# Supplementary material for: Transcriptomic Landscape of Circulating Extracellular Vesicles in Heart Transplant Ischemia–Reperfusion
Source: Genes (Basel). 2023 Nov 18;14(11):2101. doi: 10.3390/genes14112101 (PMC10671425; doi:10.3390/genes14112101)
Supplement: Supplementary file 1 [file genes-14-02101-s001.zip › Supplementary_tables_v2_final.xlsx]

## Sheet: Table S1
Table S1. RNAseq data including raw counts, and normalized counts data
Gene info					Raw count
genes	ensembl_gene_id	external_gene_name	description	gene_biotype	A0	A12	B0	B12	C0	C12	D0	D12	E0	E12	F0	F12	G0	G12	H0	H12	I0	I12	J0	J12	K0	K12	L0	L12	M0	M12	N0	N12	O0	O12	P0	P12	Q0	Q12	ER1142	ER1201	ER1233	ER1235	ER1293	ER1300	ER1333	ER1336	ER1350	ER1352	ER1500
ENSG00000160072	ENSG00000160072	ATAD3B	ATPase family AAA domain containing 3B [Source:HGNC Symbol;Acc:HGNC:24007]	protein_coding	28	213	11	93	20	146	71	84	11	229	79	237	77	70	78	113	49	108	1	66	185	300	66	221	16	176	15	119	55	381	73	84	14	236	22	162	30	367	19	69	1	23	275	57	61
ENSG00000225972	ENSG00000225972	MTND1P23	MT-ND1 pseudogene 23 [Source:HGNC Symbol;Acc:HGNC:42092]	unprocessed_pseudogene	8	3	26	6	19	8	14	11	11	26	5	5	15	2	34	37	13	10	6	17	42	18	40	11	5	10	10	13	53	45	24	4	11	3	0	2	3	13	6	8	42	38	4	3	2
ENSG00000224315	ENSG00000224315	RPL7P7	ribosomal protein L7 pseudogene 7 [Source:HGNC Symbol;Acc:HGNC:36895]	processed_pseudogene	0	1	0	15	0	2	1	0	1	45	1	1	1	1	0	1	0	2	0	9	3	28	0	1	1	14	0	4	5	0	0	0	0	5	164	0	0	1	0	0	0	4	2	2	0
ENSG00000198744	ENSG00000198744	MTCO3P12	MT-CO3 pseudogene 12 [Source:HGNC Symbol;Acc:HGNC:52042]	unprocessed_pseudogene	17	12	27	7	92	7	51	11	31	41	14	6	45	3	58	49	18	13	7	3	75	9	89	26	12	22	25	10	136	69	46	10	25	16	1	0	0	6	7	3	4	13	7	9	4
ENSG00000279928	ENSG00000279928	DDX11L17	DEAD/H-box helicase 11 like 17 (pseudogene) [Source:HGNC Symbol;Acc:HGNC:55080]	unprocessed_pseudogene	6	21	6	20	39	28	3	12	37	219	8	17	2	0	11	106	34	108	9	15	49	42	2	29	10	57	3	18	37	97	16	6	1	28	71	227	22	6	52	62	7	1	0	8	12
ENSG00000228037	ENSG00000228037		novel transcript	lncRNA	3	0	2	12	14	0	0	5	4	0	10	12	19	13	38	0	2	24	6	8	28	10	37	6	6	7	7	0	13	29	0	0	0	33	2	1	1	1	30	0	0	109	8	16	13
ENSG00000142611	ENSG00000142611	PRDM16	PR/SET domain 16 [Source:HGNC Symbol;Acc:HGNC:14000]	protein_coding	5	10	6	1	10	8	0	0	3	13	0	7	1	3	10	1	1	16	4	15	2	21	0	28	2	8	6	13	9	12	14	1	3	14	49	15	36	7	17	5	8	0	85	193	63
ENSG00000225630	ENSG00000225630	MTND2P28	MT-ND2 pseudogene 28 [Source:HGNC Symbol;Acc:HGNC:42129]	unprocessed_pseudogene	50	44	65	42	258	64	145	33	89	177	17	30	78	31	170	292	80	83	40	21	345	41	289	93	64	102	75	70	343	494	141	13	67	54	26	117	70	260	174	169	364	635	280	98	118
ENSG00000284616	ENSG00000284616		novel transcript	lncRNA	0	1	4	0	0	10	0	0	3	33	0	1	0	0	9	0	0	29	0	0	15	0	0	0	8	3	0	9	0	0	5	0	0	0	4	4	1	1	0	4	0	0	0	9	2
ENSG00000157911	ENSG00000157911	PEX10	peroxisomal biogenesis factor 10 [Source:HGNC Symbol;Acc:HGNC:8851]	protein_coding	147	212	80	42	237	110	266	93	91	127	75	569	324	177	60	241	86	293	67	114	231	206	407	137	21	216	213	178	366	251	105	106	91	641	196	462	237	5	397	253	358	1651	26	108	46
ENSG00000269896	ENSG00000269896		small nuclear ribonucleoprotein N (SNRPN) pseudogene	transcribed_processed_pseudogene	0	0	0	0	1	5	0	1	0	1	0	0	0	0	0	1	1	1	0	2	24	2	0	6	0	0	0	0	3	9	0	0	0	0	0	1	0	0	1	0	0	0	12	7	8
ENSG00000237973	ENSG00000237973	MTCO1P12	MT-CO1 pseudogene 12 [Source:HGNC Symbol;Acc:HGNC:52014]	unprocessed_pseudogene	9	21	24	11	117	9	59	7	29	50	9	8	43	2	55	39	26	7	17	22	75	7	111	31	11	23	37	14	127	100	43	2	21	14	5	8	23	24	9	27	92	99	42	13	12
ENSG00000228463	ENSG00000228463		ribosomal protein L23a (RPL23A) pseudogene	transcribed_processed_pseudogene	3	31	5	39	26	19	18	3	20	73	35	52	19	6	24	14	13	20	4	59	30	44	9	58	3	17	35	45	8	52	19	7	2	50	147	5	6	4	14	8	0	0	21	11	6
ENSG00000157933	ENSG00000157933	SKI	SKI proto-oncogene [Source:HGNC Symbol;Acc:HGNC:10896]	protein_coding	3	28	7	0	74	10	11	3	7	44	14	26	3	5	4	3	4	16	10	7	34	16	24	33	0	1	16	11	15	9	32	7	16	37	5	22	15	6	5	46	38	11	120	144	63
ENSG00000226545	ENSG00000226545		ribosomal protein L27 (RPL27) pseudogene	unprocessed_pseudogene	0	6	1	0	1	6	1	0	6	0	0	0	0	0	4	8	0	0	1	2	1	12	1	1	7	3	4	3	0	0	0	0	0	0	0	0	2	2	0	3	0	0	0	0	6
ENSG00000226374	ENSG00000226374	LINC01345	long intergenic non-protein coding RNA 1345 [Source:HGNC Symbol;Acc:HGNC:50564]	lncRNA	0	1	0	5	2	24	1	1	0	1	0	0	0	0	5	0	0	11	0	14	0	17	0	6	1	1	1	18	0	0	1	0	0	0	8	4	3	0	5	1	0	0	1	23	10
ENSG00000229280	ENSG00000229280	EEF1DP6	eukaryotic translation elongation factor 1 delta pseudogene 6 [Source:HGNC Symbol;Acc:HGNC:51456]	processed_pseudogene	0	11	1	0	7	35	0	0	4	5	0	22	0	5	16	0	2	0	0	6	23	0	4	1	10	6	6	9	7	4	11	2	0	0	17	0	13	0	26	5	0	0	7	1	5
ENSG00000142655	ENSG00000142655	PEX14	peroxisomal biogenesis factor 14 [Source:HGNC Symbol;Acc:HGNC:8856]	protein_coding	59	200	22	21	108	110	78	105	45	99	54	207	75	140	36	83	18	138	19	67	114	117	106	101	7	110	75	90	70	117	44	71	29	225	10	66	78	156	71	259	3	143	632	30	64
ENSG00000232596	ENSG00000232596	LINC01646	long intergenic non-protein coding RNA 1646 [Source:HGNC Symbol;Acc:HGNC:52433]	lncRNA	0	0	2	20	13	11	4	4	8	6	0	0	1	0	10	0	6	9	2	24	9	113	9	9	3	34	4	26	0	8	4	2	1	5	126	20	3	1	15	28	1	0	0	32	15
ENSG00000232663	ENSG00000232663		pseudogene similar to part of cytochrome oxidase subunit II	processed_pseudogene	0	4	0	0	0	0	0	3	1	0	0	0	0	1	9	3	5	4	1	9	0	19	8	0	4	1	0	5	4	5	10	1	0	8	0	1	0	0	0	0	5	0	0	9	3
ENSG00000240409	ENSG00000240409	MTATP8P1	MT-ATP8 pseudogene 1 [Source:HGNC Symbol;Acc:HGNC:44571]	unprocessed_pseudogene	15	21	12	17	83	15	49	3	16	35	1	5	34	7	34	68	8	18	10	5	96	3	78	23	17	25	20	10	124	82	34	4	20	10	2	2	15	30	34	11	130	78	2	17	17
ENSG00000229344	ENSG00000229344	MTCO2P12	MT-CO2 pseudogene 12 [Source:HGNC Symbol;Acc:HGNC:52028]	unprocessed_pseudogene	10	3	22	16	48	10	18	15	16	21	5	5	23	4	54	46	16	8	11	8	78	2	55	9	25	25	8	3	58	62	19	2	26	15	0	2	1	12	2	4	95	33	80	29	9
ENSG00000231510	ENSG00000231510	LINC02782	long intergenic non-protein coding RNA 2782 [Source:HGNC Symbol;Acc:HGNC:54302]	lncRNA	5	2	0	3	3	0	0	1	8	0	0	1	0	1	8	0	2	1	0	9	1	4	5	3	1	5	5	5	0	2	5	2	0	0	23	1	11	1	12	0	3	0	0	2	12
ENSG00000149527	ENSG00000149527	PLCH2	phospholipase C eta 2 [Source:HGNC Symbol;Acc:HGNC:29037]	protein_coding	9	17	2	4	7	3	4	4	0	5	0	3	2	2	39	7	2	12	0	4	10	4	23	21	4	4	12	9	11	8	23	1	0	40	20	39	42	9	20	2	36	6	98	252	170
ENSG00000284739	ENSG00000284739		novel transcript	lncRNA	0	0	0	0	0	0	0	2	1	0	0	0	0	0	0	0	0	0	0	0	0	3	2	9	1	0	0	1	0	2	0	0	0	0	1	2	2	0	1	1	0	3	98	0	6
ENSG00000171621	ENSG00000171621	SPSB1	splA/ryanodine receptor domain and SOCS box containing 1 [Source:HGNC Symbol;Acc:HGNC:30628]	protein_coding	138	129	214	30	473	53	349	57	36	135	118	101	456	106	594	108	85	64	29	19	491	152	327	109	63	75	131	28	684	92	372	59	146	205	219	86	230	143	385	278	16	50	2	15	520
ENSG00000272235	ENSG00000272235		novel transcript	lncRNA	0	0	0	1	5	0	0	0	0	1	0	0	0	0	0	0	0	0	0	11	0	0	1	1	0	0	0	4	0	3	2	1	0	1	10	10	1	1	4	0	7	0	0	30	12
ENSG00000284694	ENSG00000284694		novel transcript	lncRNA	0	28	0	0	18	13	0	3	2	90	0	5	0	0	4	0	6	13	0	30	0	54	11	5	2	24	5	6	6	42	2	0	1	0	2	3	4	0	2	26	1	0	97	36	9
ENSG00000230021	ENSG00000230021		septin 14 (SEPT14) pseudogene	transcribed_processed_pseudogene	8	33	18	15	49	21	25	30	18	43	8	53	29	15	46	40	26	39	10	60	59	38	64	31	23	81	14	12	95	75	26	7	22	37	0	1	23	20	9	7	90	112	51	23	20
ENSG00000287356	ENSG00000287356		novel transcript, antisense to MORN1	lncRNA	1	10	1	6	3	4	0	1	4	0	0	5	3	0	1	2	8	2	4	5	1	3	16	20	0	4	2	0	11	28	11	0	0	6	20	11	16	3	3	31	1	4	49	124	53
ENSG00000285629	ENSG00000285629		novel transcript	protein_coding	230	480	118	171	494	338	388	250	107	447	219	740	233	432	153	342	97	445	93	189	340	414	489	326	48	394	180	321	540	433	174	154	128	800	343	636	291	512	268	496	346	643	272	800	235
ENSG00000142583	ENSG00000142583	SLC2A5	solute carrier family 2 member 5 [Source:HGNC Symbol;Acc:HGNC:11010]	protein_coding	117	486	16	48	108	94	144	80	127	578	166	222	108	284	19	133	20	72	18	27	166	31	250	255	32	664	1081	1253	71	357	97	73	51	235	204	20	279	548	30	627	7	1504	4177	28	62
ENSG00000284674	ENSG00000284674	LINC02781	long intergenic non-protein coding RNA 2781 [Source:HGNC Symbol;Acc:HGNC:54301]	lncRNA	0	2	0	1	1	12	0	1	2	2	0	0	0	0	3	0	0	8	0	9	0	2	5	11	1	6	1	3	3	8	0	1	0	0	4	3	1	0	1	0	5	3	93	57	6
ENSG00000272161	ENSG00000272161		novel transcript, sense intronic to MORN1	lncRNA	1	3	0	2	0	36	1	6	0	29	0	0	0	0	1	0	4	9	0	14	4	1	7	18	1	0	2	4	18	4	26	0	0	0	0	0	28	5	0	0	3	0	11	9	5
ENSG00000237094	ENSG00000237094		pseudogene similar to part of septin 14 SEPT14	transcribed_unprocessed_pseudogene	0	2	3	2	0	5	1	2	3	9	0	2	0	1	8	2	0	6	0	13	6	8	7	0	3	1	7	16	4	4	0	0	0	3	2	4	2	0	7	0	0	1	57	1	3
ENSG00000074800	ENSG00000074800	ENO1	enolase 1 [Source:HGNC Symbol;Acc:HGNC:3350]	protein_coding	8266	47181	2668	8348	11622	24047	12196	18193	5567	39862	6738	33615	11646	37261	5059	18229	2650	30153	2210	12429	10343	34878	13176	17474	1711	28784	17429	34306	15831	35526	5300	10861	3913	50460	6645	19556	10607	33849	6811	49523	13030	77735	40192	2947	5226
ENSG00000116786	ENSG00000116786	PLEKHM2	pleckstrin homology and RUN domain containing M2 [Source:HGNC Symbol;Acc:HGNC:29131]	protein_coding	492	776	235	190	639	512	901	399	236	566	282	846	490	478	216	514	179	612	178	199	691	534	541	253	81	536	242	506	935	902	262	403	194	1279	473	47	652	15	227	1340	45	1195	52	93	329
ENSG00000287727	ENSG00000287727		novel transcript, antisense to PEX14	lncRNA	0	4	1	4	0	4	0	1	2	8	0	3	0	0	0	1	0	2	0	21	8	11	1	15	1	1	2	11	0	18	2	1	0	0	6	11	7	1	2	4	0	0	6	13	20
ENSG00000228423	ENSG00000228423		novel transcript	lncRNA	0	11	0	7	1	2	0	1	2	7	0	0	0	2	3	0	0	9	0	4	1	52	0	4	2	6	0	12	0	0	1	1	0	1	0	4	15	0	0	9	0	0	0	0	13
ENSG00000286448	ENSG00000286448		novel transcript	lncRNA	3	8	1	21	2	16	6	1	6	15	7	13	11	3	11	2	9	10	0	30	2	13	12	8	3	6	21	15	6	41	4	6	0	10	79	0	0	0	2	0	0	0	0	0	3
ENSG00000131686	ENSG00000131686	CA6	carbonic anhydrase 6 [Source:HGNC Symbol;Acc:HGNC:1380]	protein_coding	1	3	3	2	6	41	0	0	1	17	8	1	1	1	3	0	5	17	1	7	1	13	0	6	5	4	1	14	7	14	5	2	0	9	5	17	3	3	0	2	1	0	47	6	9
ENSG00000229305	ENSG00000229305		52kDa eukaryotic translation initiation factor 2 subunit 3 gamma (EIF2S3) pseudogene	processed_pseudogene	1	6	0	8	11	2	0	6	4	11	0	0	6	3	21	0	1	19	0	14	2	32	2	12	4	5	8	8	9	22	1	1	0	3	0	1	0	0	17	1	0	1	53	0	4
ENSG00000284703	ENSG00000284703		novel transcript	lncRNA	1	18	8	22	36	16	2	5	15	54	0	10	11	2	10	2	2	13	5	23	15	42	8	27	28	13	15	21	39	22	5	3	4	1	67	11	8	1	21	11	3	0	115	30	24
ENSG00000226457	ENSG00000226457	RPL22P3	ribosomal protein L22 pseudogene 3 [Source:HGNC Symbol;Acc:HGNC:36804]	processed_pseudogene	1	15	0	19	0	0	0	2	1	2	0	2	1	0	15	0	9	28	0	5	13	7	9	0	10	6	1	5	0	19	4	1	0	6	0	0	0	1	0	0	0	0	0	0	0
ENSG00000173614	ENSG00000173614	NMNAT1	nicotinamide nucleotide adenylyltransferase 1 [Source:HGNC Symbol;Acc:HGNC:17877]	protein_coding	124	145	40	62	251	106	145	84	90	205	58	186	118	107	68	129	66	181	65	81	54	168	247	92	24	137	141	191	231	169	135	104	56	315	169	89	58	8	174	100	0	29	3674	19	52
ENSG00000248527	ENSG00000248527	MTATP6P1	MT-ATP6 pseudogene 1 [Source:HGNC Symbol;Acc:HGNC:44575]	unprocessed_pseudogene	156	134	169	124	745	111	373	85	217	400	59	59	272	42	384	665	151	191	108	26	791	67	776	213	104	199	235	130	1024	788	276	39	229	160	213	621	658	2262	1189	2732	4575	8123	3419	1778	1409
ENSG00000215720	ENSG00000215720	MFFP1	MFF pseudogene 1 [Source:HGNC Symbol;Acc:HGNC:54537]	processed_pseudogene	0	1	0	2	7	2	0	0	1	1	0	0	0	0	0	0	2	4	0	4	14	3	0	0	1	2	1	7	0	5	6	1	0	0	2	1	2	0	0	0	0	0	7	0	5
ENSG00000241326	ENSG00000241326		novel transcript	lncRNA	3	12	2	5	26	2	20	16	10	33	5	13	26	11	7	7	1	16	5	5	10	9	14	12	3	10	19	21	34	4	12	15	2	15	2	69	0	1	31	0	0	0	0	1	3
ENSG00000162592	ENSG00000162592	CCDC27	coiled-coil domain containing 27 [Source:HGNC Symbol;Acc:HGNC:26546]	protein_coding	13	40	7	26	60	31	22	10	22	71	0	39	37	18	71	9	7	36	5	28	100	56	53	85	23	20	44	59	92	92	36	9	13	39	126	16	10	42	49	32	33	1	125	85	68
ENSG00000116254	ENSG00000116254	CHD5	chromodomain helicase DNA binding protein 5 [Source:HGNC Symbol;Acc:HGNC:16816]	protein_coding	6	6	1	25	42	26	4	4	7	13	0	8	0	2	7	21	7	17	0	24	8	28	16	8	2	16	4	30	10	68	15	1	4	4	128	42	25	9	16	3	22	0	140	161	111
ENSG00000233645	ENSG00000233645		novel transcript	lncRNA	0	3	0	3	0	1	0	4	1	8	0	6	0	0	4	0	10	9	0	6	0	35	4	0	2	11	0	0	3	7	1	0	0	9	0	5	0	9	1	0	0	2	0	13	1
ENSG00000204624	ENSG00000204624	DISP3	dispatched RND transporter family member 3 [Source:HGNC Symbol;Acc:HGNC:29251]	protein_coding	3	12	0	0	23	33	3	11	2	30	0	1	1	2	28	6	3	14	0	32	9	76	7	14	13	15	3	32	23	32	7	1	0	5	43	12	26	7	17	41	12	7	8	161	71
ENSG00000142606	ENSG00000142606	MMEL1	membrane metalloendopeptidase like 1 [Source:HGNC Symbol;Acc:HGNC:14668]	protein_coding	55	167	10	25	108	87	198	69	38	143	35	134	50	131	36	115	60	169	19	39	90	84	114	110	15	134	166	145	143	104	72	54	29	158	9	11	40	7	43	116	5	502	37	84	178
ENSG00000225931	ENSG00000225931		novel transcript	TEC	1	0	0	0	2	2	4	0	0	0	0	0	0	0	0	0	0	3	2	0	0	0	3	2	1	3	1	0	0	16	1	0	0	4	1	4	2	0	2	0	7	0	17	0	6
ENSG00000171729	ENSG00000171729	TMEM51	transmembrane protein 51 [Source:HGNC Symbol;Acc:HGNC:25488]	protein_coding	18	35	36	29	55	3	40	30	17	14	9	39	0	3	9	38	0	44	10	45	53	73	56	17	19	29	39	30	35	61	7	7	2	32	26	11	21	0	31	22	0	0	21	35	21
ENSG00000279457	ENSG00000279457	WASH9P	WAS protein family homolog 9, pseudogene [Source:HGNC Symbol;Acc:HGNC:53981]	unprocessed_pseudogene	13	14	1	0	17	16	13	4	4	14	6	10	37	8	22	12	4	15	2	7	17	8	22	15	4	11	8	9	19	10	11	4	6	26	12	1	10	4	17	14	10	3	0	17	14
ENSG00000162571	ENSG00000162571	TTLL10	tubulin tyrosine ligase like 10 [Source:HGNC Symbol;Acc:HGNC:26693]	protein_coding	2	4	0	6	0	3	0	0	0	13	0	0	1	0	14	1	14	13	6	2	1	12	3	1	0	7	0	2	7	0	10	7	0	0	5	10	17	5	10	12	9	0	77	35	48
ENSG00000229393	ENSG00000229393		novel transcript	lncRNA	0	1	1	0	2	3	2	0	0	1	0	0	0	0	0	0	2	2	0	0	0	6	0	1	0	0	0	0	0	1	10	0	0	0	13	0	8	1	3	5	7	0	0	7	10
ENSG00000037637	ENSG00000037637	FBXO42	F-box protein 42 [Source:HGNC Symbol;Acc:HGNC:29249]	protein_coding	404	839	122	256	1155	651	813	210	286	1030	487	1219	756	537	600	586	167	733	228	331	781	471	861	359	82	977	521	543	1360	1065	85	270	240	817	1277	750	726	439	450	388	1204	3	77	52	1020
ENSG00000287586	ENSG00000287586		novel transcript, antisense to AJAP1	lncRNA	11	4	0	3	9	5	43	2	33	43	16	0	0	0	2	2	2	1	0	3	0	36	23	26	0	0	1	19	16	8	4	7	6	0	4	8	2	1	2	3	5	0	6	36	44
ENSG00000159423	ENSG00000159423	ALDH4A1	aldehyde dehydrogenase 4 family member A1 [Source:HGNC Symbol;Acc:HGNC:406]	protein_coding	165	320	43	69	198	240	119	289	91	433	51	161	118	478	23	343	73	216	25	102	387	246	188	209	69	411	420	701	617	263	33	96	46	401	245	12	150	1	9	170	6	0	55	69	43
ENSG00000142599	ENSG00000142599	RERE	arginine-glutamic acid dipeptide repeats [Source:HGNC Symbol;Acc:HGNC:9965]	protein_coding	106	131	39	72	289	121	278	75	94	135	239	231	132	104	62	78	82	170	26	142	370	268	180	115	29	176	91	119	329	192	146	74	76	196	214	44	272	7	284	196	2	122	104	107	297
ENSG00000227169	ENSG00000227169		novel transcript	lncRNA	0	7	0	12	0	14	0	0	0	14	0	0	0	0	0	0	1	0	0	10	0	5	2	0	1	2	3	0	0	3	0	2	3	0	51	0	0	0	4	0	0	0	60	0	0
ENSG00000011021	ENSG00000011021	CLCN6	chloride voltage-gated channel 6 [Source:HGNC Symbol;Acc:HGNC:2024]	protein_coding	64	62	34	26	261	49	100	34	34	126	43	26	213	87	178	18	35	100	19	32	234	56	91	31	37	65	30	61	177	82	128	25	30	87	50	507	245	18	340	16	714	4	142	59	597
ENSG00000142615	ENSG00000142615	CELA2A	chymotrypsin like elastase 2A [Source:HGNC Symbol;Acc:HGNC:24609]	protein_coding	1	21	8	18	40	24	0	4	5	25	0	0	5	3	33	2	14	25	1	21	6	22	6	14	12	22	14	24	4	50	11	8	4	19	38	27	1	24	1	3	0	0	44	40	23
ENSG00000215704	ENSG00000215704	CELA2B	chymotrypsin like elastase 2B [Source:HGNC Symbol;Acc:HGNC:29995]	protein_coding	4	10	8	15	34	29	7	9	1	28	1	5	7	3	24	3	11	20	4	22	32	53	11	16	9	51	7	17	26	29	15	16	7	19	0	47	33	2	4	0	3	0	14	7	16
ENSG00000157916	ENSG00000157916	RER1	retention in endoplasmic reticulum sorting receptor 1 [Source:HGNC Symbol;Acc:HGNC:30309]	protein_coding	694	784	201	212	1304	671	1302	458	304	920	466	1742	812	758	396	531	301	747	241	393	860	750	1036	766	117	763	550	752	1471	990	355	420	385	1575	738	877	727	435	992	928	1537	1522	26	3188	582
ENSG00000157881	ENSG00000157881	PANK4	pantothenate kinase 4 (inactive) [Source:HGNC Symbol;Acc:HGNC:19366]	protein_coding	170	428	69	56	251	226	198	171	118	230	164	665	222	308	97	159	73	341	73	217	244	326	249	343	4	411	236	299	259	852	183	247	66	496	14	15	216	314	213	273	883	674	63	199	366
ENSG00000238290	ENSG00000238290	ERRFI1-DT	ERRFI1 divergent transcript [Source:HGNC Symbol;Acc:HGNC:55646]	lncRNA	0	37	3	28	7	13	0	8	5	11	0	0	0	5	1	0	8	22	0	13	7	43	17	10	11	15	1	18	2	41	4	4	0	0	26	7	3	2	10	0	0	8	25	8	26
ENSG00000225387	ENSG00000225387		novel transcript	lncRNA	0	0	0	0	10	1	0	2	0	21	0	0	0	0	0	0	0	3	0	2	0	21	0	11	0	0	2	0	5	0	0	7	0	0	8	0	0	0	0	1	0	0	67	3	5
ENSG00000048707	ENSG00000048707	VPS13D	vacuolar protein sorting 13 homolog D [Source:HGNC Symbol;Acc:HGNC:23595]	protein_coding	73	278	60	126	854	219	158	111	137	469	119	465	588	135	220	254	73	474	50	236	529	322	483	186	96	414	136	293	738	473	152	138	117	247	179	38	77	14	239	120	21	165	138	155	287
ENSG00000158748	ENSG00000158748	HTR6	5-hydroxytryptamine receptor 6 [Source:HGNC Symbol;Acc:HGNC:5301]	protein_coding	0	4	0	0	0	3	0	1	1	0	0	1	0	0	3	7	1	6	0	6	0	5	3	1	1	3	3	15	0	34	3	1	1	7	8	12	13	0	1	0	8	0	47	64	30
ENSG00000225196	ENSG00000225196	RPL10P17	ribosomal protein L10 pseudogene 17 [Source:HGNC Symbol;Acc:HGNC:52348]	processed_pseudogene	0	0	0	19	0	0	4	5	3	1	0	14	0	0	5	1	15	1	1	4	4	13	1	5	1	0	2	8	6	0	2	0	1	0	0	0	0	0	0	0	0	0	0	13	3
ENSG00000162444	ENSG00000162444	RBP7	retinol binding protein 7 [Source:HGNC Symbol;Acc:HGNC:30316]	protein_coding	1721	855	637	360	2198	432	1832	355	845	1235	1120	1496	850	541	513	1010	671	363	560	194	1737	1479	1640	493	154	530	541	329	1724	626	861	198	497	1598	614	1064	2370	1147	828	1866	3007	2023	1084	1480	668
ENSG00000180758	ENSG00000180758	GPR157	G protein-coupled receptor 157 [Source:HGNC Symbol;Acc:HGNC:23687]	protein_coding	8	30	8	8	33	32	16	23	10	89	2	70	29	18	19	10	8	44	5	24	4	45	18	35	27	66	101	40	36	80	22	17	5	71	8	29	29	7	14	4	6	7	72	54	50
ENSG00000184677	ENSG00000184677	ZBTB40	zinc finger and BTB domain containing 40 [Source:HGNC Symbol;Acc:HGNC:29045]	protein_coding	25	59	47	78	81	323	7	124	14	418	28	214	76	55	43	94	38	176	40	117	6	107	178	172	14	125	122	316	622	191	37	32	29	101	72	45	8	5	15	32	4	0	141	51	94
ENSG00000230679	ENSG00000230679	ENO1-AS1	ENO1 antisense RNA 1 [Source:HGNC Symbol;Acc:HGNC:40214]	lncRNA	3	10	3	10	31	11	5	5	1	8	1	8	3	0	5	0	2	14	0	15	7	19	6	4	2	18	12	6	10	10	14	8	3	10	30	1	2	0	13	6	0	3	0	13	2
ENSG00000270136	ENSG00000270136	MICOS10-NBL1	MICOS10-NBL1 readthrough [Source:HGNC Symbol;Acc:HGNC:48338]	protein_coding	465	771	168	236	901	534	773	429	208	730	369	1175	600	593	311	422	201	672	135	282	836	754	870	604	65	546	368	515	1124	609	364	253	255	1454	1037	1197	1028	2006	867	2097	3053	2507	8865	2294	885
ENSG00000288398	ENSG00000288398		novel transcript	lncRNA	4	12	9	7	36	3	15	2	8	14	1	1	0	4	22	0	6	1	0	29	20	63	6	2	6	7	12	4	61	20	6	8	0	7	16	12	55	31	12	2	1	1	163	38	27
ENSG00000224621	ENSG00000224621		novel transcript	lncRNA	0	20	2	4	5	25	4	8	6	15	0	1	7	2	4	0	11	19	0	14	11	1	32	4	0	18	3	8	2	9	7	1	2	10	3	0	1	0	2	4	0	0	0	1	3
ENSG00000131697	ENSG00000131697	NPHP4	nephrocystin 4 [Source:HGNC Symbol;Acc:HGNC:19104]	protein_coding	65	21	26	1	1	46	47	25	12	251	0	41	124	0	3	95	5	94	8	29	4	152	49	11	4	70	54	43	32	47	45	28	8	76	409	36	19	7	2	9	22	0	68	198	114
ENSG00000284692	ENSG00000284692		novel transcript	lncRNA	1	14	4	15	0	34	2	2	0	4	0	2	0	0	24	1	1	24	1	16	2	7	5	5	4	2	6	17	10	130	5	5	1	2	1	1	8	2	10	0	4	2	0	31	19
ENSG00000284745	ENSG00000284745		novel transcript	lncRNA	3	8	0	19	0	1	0	0	1	18	0	0	0	0	20	0	0	13	0	0	0	60	1	0	0	0	2	14	0	54	6	0	2	0	4	2	5	2	4	0	4	0	29	19	11
ENSG00000280222	ENSG00000280222		TEC	TEC	9	0	2	5	0	6	2	2	0	35	0	6	1	0	0	0	1	10	0	1	6	9	3	4	1	3	0	3	4	8	5	7	2	0	7	16	5	11	4	2	8	0	49	81	37
ENSG00000227634	ENSG00000227634	LINC01714	long intergenic non-protein coding RNA 1714 [Source:HGNC Symbol;Acc:HGNC:52501]	lncRNA	0	3	0	3	0	0	0	0	0	10	0	0	0	2	1	0	0	9	1	2	0	0	2	2	11	7	0	3	0	4	0	0	0	0	0	0	1	0	3	1	0	0	0	0	5
ENSG00000197921	ENSG00000197921	HES5	hes family bHLH transcription factor 5 [Source:HGNC Symbol;Acc:HGNC:19764]	protein_coding	0	1	0	0	19	3	6	1	6	0	7	3	0	0	0	0	0	8	1	0	0	3	0	8	0	5	0	3	4	0	1	1	0	11	3	4	4	0	17	20	1	0	6	48	18
ENSG00000233755	ENSG00000233755		novel transcript	lncRNA	6	6	0	6	15	1	3	0	6	7	0	6	2	0	3	0	1	0	2	5	0	0	8	0	0	7	13	19	0	1	4	0	0	3	0	1	0	4	1	1	0	1	3	2	8
ENSG00000233929	ENSG00000233929	MT1XP1	metallothionein 1X pseudogene 1 [Source:HGNC Symbol;Acc:HGNC:7442]	processed_pseudogene	0	5	0	0	3	2	0	4	6	40	0	5	4	5	0	0	4	5	0	0	6	7	3	4	7	7	2	2	25	13	9	1	2	8	2	4	0	1	4	9	6	1	16	0	6
ENSG00000226396	ENSG00000226396		ribosomal protein S14 (RPS14) pseudogene	processed_pseudogene	25	57	20	18	43	32	49	27	6	47	25	132	17	47	13	26	12	43	12	23	39	25	36	30	1	22	20	43	44	56	19	17	14	94	1	9	7	13	6	10	10	8	51	13	1
ENSG00000169504	ENSG00000169504	CLIC4	chloride intracellular channel 4 [Source:HGNC Symbol;Acc:HGNC:13518]	protein_coding	2166	6113	1900	1594	8218	3624	2818	4769	2228	6068	4088	6199	7513	6270	3863	5173	2026	6470	1647	2787	11407	9831	8744	3906	1155	4099	2779	2400	13357	3942	3941	6760	1303	6358	1789	18	2661	3277	4285	3073	1849	3561	2087	1431	623
ENSG00000234166	ENSG00000234166	ARHGEF19-AS1	ARHGEF19 antisense RNA 1 [Source:HGNC Symbol;Acc:HGNC:39996]	lncRNA	9	14	9	2	44	25	17	21	10	69	15	36	46	62	29	28	12	16	0	36	35	35	26	23	1	33	35	50	65	34	13	22	13	149	0	0	9	0	64	46	0	0	22	12	6
ENSG00000055070	ENSG00000055070	SZRD1	SUZ RNA binding domain containing 1 [Source:HGNC Symbol;Acc:HGNC:30232]	protein_coding	724	1264	178	329	1089	798	993	733	406	1186	573	1941	738	953	364	1275	288	1085	267	577	1011	1365	1119	772	131	1125	698	1054	1399	1415	536	595	257	2500	643	980	1228	798	845	1649	1337	1553	1503	716	637
ENSG00000175087	ENSG00000175087	PDIK1L	PDLIM1 interacting kinase 1 like [Source:HGNC Symbol;Acc:HGNC:18981]	protein_coding	145	210	71	90	234	168	126	155	110	282	119	832	239	443	17	133	48	484	51	110	353	476	141	290	28	403	177	323	72	287	117	105	51	315	0	5	86	218	265	288	0	660	4846	15	22
ENSG00000157191	ENSG00000157191	NECAP2	NECAP endocytosis associated 2 [Source:HGNC Symbol;Acc:HGNC:25528]	protein_coding	1119	2062	507	507	2159	1150	2344	835	682	1416	744	3156	1192	1431	822	1211	385	1787	574	845	1830	1669	2331	1108	182	1322	996	1162	2099	2001	792	991	615	3219	665	383	1745	2357	1438	2740	3374	6392	38	46	1271
ENSG00000284699	ENSG00000284699		novel transcript	lncRNA	0	8	7	3	22	8	1	2	3	2	0	11	5	0	32	0	1	0	1	6	1	8	0	1	10	11	2	13	17	9	1	2	2	6	33	9	10	1	11	9	3	0	153	2	10
ENSG00000235185	ENSG00000235185	MICOS10-DT	MICOS10 divergent transcript [Source:HGNC Symbol;Acc:HGNC:55676]	lncRNA	0	4	0	5	2	6	0	1	0	0	0	0	0	0	15	0	1	1	0	9	1	15	0	2	2	4	0	2	0	32	10	0	0	1	3	0	0	0	14	0	0	0	0	1	6
ENSG00000225643	ENSG00000225643		novel transcript	lncRNA	12	42	7	0	28	4	11	0	1	1	0	46	43	23	0	6	3	15	0	12	43	23	11	23	1	18	4	21	10	45	9	7	5	31	12	7	25	0	21	0	0	0	0	0	9
ENSG00000284666	ENSG00000284666		novel transcript	lncRNA	0	3	0	0	0	1	0	0	0	0	0	2	0	0	2	0	1	3	0	3	0	13	0	0	1	0	0	0	0	0	0	0	0	1	4	1	0	0	2	0	0	0	0	14	5
ENSG00000228943	ENSG00000228943		NADH dehydrogenase (ubiquinone) 1 alpha subcomplex, 4, 9kDa (NDUFA4) pseudogene	processed_pseudogene	0	6	0	3	2	17	2	8	1	4	0	2	0	0	2	0	3	7	0	4	2	9	0	0	3	7	2	5	1	0	1	0	0	0	0	0	5	0	0	0	0	0	0	21	1
ENSG00000284309	ENSG00000284309		novel transcript	lncRNA	0	4	1	10	0	11	0	1	4	10	0	0	0	3	0	0	2	9	1	15	2	3	2	3	0	0	17	2	3	15	16	1	0	0	45	2	1	2	1	0	4	0	18	7	8
ENSG00000162511	ENSG00000162511	LAPTM5	lysosomal protein transmembrane 5 [Source:HGNC Symbol;Acc:HGNC:29612]	protein_coding	7920	6430	1709	2031	9594	6229	9586	3033	2961	6335	4564	8950	5360	7218	2060	7772	2603	4952	1945	1802	4107	5924	5664	3953	666	6932	3859	3861	5426	9002	2888	2850	1963	12291	3241	8338	10250	4044	4113	14534	7004	10721	14240	3806	4250
ENSG00000158014	ENSG00000158014	SLC30A2	solute carrier family 30 member 2 [Source:HGNC Symbol;Acc:HGNC:11013]	protein_coding	5	8	0	2	3	28	8	2	1	5	0	36	34	5	7	5	2	2	1	4	0	31	3	2	7	1	5	20	3	42	6	3	2	2	108	8	8	2	5	1	2	5	160	51	43
ENSG00000204138	ENSG00000204138	PHACTR4	phosphatase and actin regulator 4 [Source:HGNC Symbol;Acc:HGNC:25793]	protein_coding	82	293	55	97	298	124	198	157	123	287	99	263	164	320	167	69	82	417	126	240	605	334	361	249	99	567	267	359	300	411	149	187	79	376	282	817	265	19	172	153	10	519	84	27	34
ENSG00000233419	ENSG00000233419	IFITM3P7	IFITM3 pseudogene 7 [Source:HGNC Symbol;Acc:HGNC:54546]	processed_pseudogene	0	6	0	6	8	5	0	0	2	18	0	0	0	0	0	0	1	0	0	11	0	19	2	0	3	0	4	0	1	17	0	2	2	0	51	0	0	1	0	0	5	0	70	12	7
ENSG00000235263	ENSG00000235263		novel transcript	lncRNA	0	9	0	0	1	2	0	0	1	18	0	19	0	0	14	16	2	0	0	3	0	15	0	17	5	4	0	0	1	0	2	0	0	0	1	1	0	0	2	0	0	0	48	2	5
ENSG00000231251	ENSG00000231251		family with sequence similarity 32, member A (FAM32A) pseudogene	processed_pseudogene	2	8	0	0	0	1	0	0	0	0	0	0	2	0	1	0	0	1	0	2	1	31	0	0	3	0	1	3	3	0	0	0	0	2	3	0	1	0	2	1	0	1	0	1	0
ENSG00000142675	ENSG00000142675	CNKSR1	connector enhancer of kinase suppressor of Ras 1 [Source:HGNC Symbol;Acc:HGNC:19700]	protein_coding	3	20	1	13	7	22	12	14	4	54	6	54	13	5	26	18	8	18	0	13	8	69	11	66	4	23	11	54	36	120	31	17	4	16	60	14	36	9	38	62	15	2	45	74	36
ENSG00000197245	ENSG00000197245	FAM110D	family with sequence similarity 110 member D [Source:HGNC Symbol;Acc:HGNC:25860]	protein_coding	92	106	117	31	222	131	152	54	123	212	60	102	39	64	100	176	78	69	36	19	1037	193	636	172	30	76	103	19	329	55	92	13	117	263	417	593	185	64	304	286	12	277	39	25	21
ENSG00000261025	ENSG00000261025		novel transcript	lncRNA	0	9	0	21	32	6	0	1	0	0	3	1	0	0	3	0	11	7	0	11	0	19	0	6	5	0	1	8	5	12	7	0	1	1	7	10	32	1	8	7	0	0	6	7	11
ENSG00000116237	ENSG00000116237	ICMT	isoprenylcysteine carboxyl methyltransferase [Source:HGNC Symbol;Acc:HGNC:5350]	protein_coding	206	447	103	135	692	254	412	416	90	603	241	701	379	290	198	319	139	475	116	194	618	460	578	220	91	624	278	458	928	686	204	212	120	703	162	17	183	374	373	295	3	580	13	26	21
ENSG00000130772	ENSG00000130772	MED18	mediator complex subunit 18 [Source:HGNC Symbol;Acc:HGNC:25944]	protein_coding	120	219	41	78	200	124	221	106	70	185	109	414	143	132	52	97	24	207	32	86	124	137	213	103	18	218	107	147	151	216	107	50	35	405	1	10	131	134	77	100	0	0	29	1	16
ENSG00000284676	ENSG00000284676		novel transcript	lncRNA	0	3	0	8	0	1	0	0	0	2	0	0	0	0	0	0	0	1	0	0	0	3	0	0	0	0	2	0	2	2	0	0	1	0	0	0	0	2	5	0	5	0	5	15	8
ENSG00000237058	ENSG00000237058	MMEL1-AS1	MMEL1 antisense RNA 1 [Source:HGNC Symbol;Acc:HGNC:40695]	lncRNA	0	16	5	14	11	5	4	0	9	5	0	2	0	5	7	0	6	2	1	11	0	11	7	0	4	2	6	8	5	1	8	0	1	1	11	0	1	9	2	0	0	0	0	18	20
ENSG00000090020	ENSG00000090020	SLC9A1	solute carrier family 9 member A1 [Source:HGNC Symbol;Acc:HGNC:11071]	protein_coding	42	36	25	11	142	23	162	71	25	78	105	60	29	33	6	5	5	66	22	25	190	63	97	251	2	151	69	67	170	86	39	25	10	253	109	9	148	7	74	117	3	1	65	60	39
ENSG00000157978	ENSG00000157978	LDLRAP1	low density lipoprotein receptor adaptor protein 1 [Source:HGNC Symbol;Acc:HGNC:18640]	protein_coding	186	916	207	305	633	1023	560	508	261	1642	256	1442	787	985	311	2454	148	825	173	282	958	732	953	1751	170	1442	554	881	818	2993	309	309	358	2515	161	1681	772	814	1355	1326	510	2442	70	44	870
ENSG00000270282	ENSG00000270282		ferritin, light polypeptide (FTL) pseudogene	processed_pseudogene	0	9	0	0	0	11	0	0	0	0	0	0	0	8	4	5	0	4	0	15	0	5	0	2	0	0	0	3	0	0	0	2	0	0	17	0	0	0	0	0	0	0	0	1	1
ENSG00000130770	ENSG00000130770	ATP5IF1	ATP synthase inhibitory factor subunit 1 [Source:HGNC Symbol;Acc:HGNC:871]	protein_coding	837	1728	249	509	1501	1137	1539	1095	608	1993	855	2839	1051	1462	496	1372	361	1938	305	665	1274	1457	1809	1965	225	2294	1350	1819	1961	3391	608	535	445	2576	703	3092	1498	2853	1138	2478	2476	3735	12097	2813	955
ENSG00000229044	ENSG00000229044		novel transcript	lncRNA	204	692	112	114	421	352	375	291	179	661	209	967	245	558	157	344	102	415	128	147	429	431	499	500	91	678	432	507	559	614	178	201	131	732	249	363	192	257	539	640	370	1257	1507	2	96
ENSG00000162512	ENSG00000162512	SDC3	syndecan 3 [Source:HGNC Symbol;Acc:HGNC:10660]	protein_coding	29	114	61	20	86	29	77	93	63	40	84	168	30	38	111	52	46	34	35	40	83	79	78	63	20	42	54	25	110	105	128	28	51	62	25	361	124	10	165	229	18	6	20	52	51
ENSG00000158006	ENSG00000158006	PAFAH2	platelet activating factor acetylhydrolase 2 [Source:HGNC Symbol;Acc:HGNC:8579]	protein_coding	38	141	69	73	499	149	131	192	81	137	211	925	154	113	49	287	50	435	77	91	149	158	239	211	47	340	191	190	207	576	187	149	73	592	39	2	6	7	241	105	854	0	37	23	388
ENSG00000126698	ENSG00000126698	DNAJC8	DnaJ heat shock protein family (Hsp40) member C8 [Source:HGNC Symbol;Acc:HGNC:15470]	protein_coding	1505	3659	697	975	3675	1909	2574	1645	1177	3215	1543	5700	2677	2563	1176	1818	851	2821	653	1469	3375	2921	2949	2161	413	3079	2169	3329	4634	3771	1170	1432	959	4513	2939	4454	2322	2947	2994	3981	5784	8854	20417	7125	1828
ENSG00000229447	ENSG00000229447		general transcription factor IIA, 2, 12kDa (GTF2A2) pseudogene	processed_pseudogene	0	23	5	9	8	14	5	4	18	1	0	2	0	0	28	0	3	9	2	29	10	14	12	12	11	1	6	19	3	0	7	3	1	2	47	1	2	1	16	16	0	0	126	8	1
ENSG00000130766	ENSG00000130766	SESN2	sestrin 2 [Source:HGNC Symbol;Acc:HGNC:20746]	protein_coding	122	262	19	13	357	240	738	119	43	139	73	423	197	191	106	249	61	296	36	118	71	273	49	90	13	321	162	195	493	834	142	475	49	976	74	574	315	4	356	284	93	1	86	40	235
ENSG00000168528	ENSG00000168528	SERINC2	serine incorporator 2 [Source:HGNC Symbol;Acc:HGNC:23231]	protein_coding	178	633	25	73	106	226	103	144	27	304	65	178	37	398	0	144	20	190	23	40	111	224	66	110	9	414	91	299	100	304	9	73	26	315	234	7	74	348	33	538	10	2	17	23	33
ENSG00000196581	ENSG00000196581	AJAP1	adherens junctions associated protein 1 [Source:HGNC Symbol;Acc:HGNC:30801]	protein_coding	15	23	8	5	13	8	25	7	20	67	10	18	32	2	38	44	10	20	27	39	91	47	73	10	14	37	16	37	36	33	17	11	4	2	115	17	95	6	133	66	18	0	222	87	69
ENSG00000169403	ENSG00000169403	PTAFR	platelet activating factor receptor [Source:HGNC Symbol;Acc:HGNC:9582]	protein_coding	1119	391	347	117	702	553	1302	240	549	327	719	628	928	322	696	111	374	525	388	312	408	701	709	421	65	352	624	413	790	567	506	757	363	1642	687	57	1191	212	761	677	984	201	4	16	817
ENSG00000084628	ENSG00000084628	NKAIN1	sodium/potassium transporting ATPase interacting 1 [Source:HGNC Symbol;Acc:HGNC:25743]	protein_coding	0	17	4	8	18	18	0	14	4	12	0	0	8	0	29	17	2	19	1	22	6	92	12	18	4	29	1	16	8	34	17	5	0	0	138	117	1	0	8	15	3	2	11	48	33
ENSG00000060688	ENSG00000060688	SNRNP40	small nuclear ribonucleoprotein U5 subunit 40 [Source:HGNC Symbol;Acc:HGNC:30857]	protein_coding	453	1888	263	453	1381	1073	869	928	473	2194	683	3575	872	1853	713	1007	336	2024	237	915	1698	2199	1163	1034	175	1721	1052	1844	1831	1932	619	631	403	2207	843	1273	727	941	801	2003	1864	3843	7868	23	480
ENSG00000171612	ENSG00000171612	SLC25A33	solute carrier family 25 member 33 [Source:HGNC Symbol;Acc:HGNC:29681]	protein_coding	175	289	66	40	112	100	332	129	47	149	46	354	189	275	138	119	77	255	71	163	440	277	255	247	45	308	92	227	441	335	187	128	62	662	30	545	237	157	98	311	8	508	11	44	23
ENSG00000188910	ENSG00000188910	GJB3	gap junction protein beta 3 [Source:HGNC Symbol;Acc:HGNC:4285]	protein_coding	0	9	3	5	5	3	0	7	1	0	0	0	0	0	4	0	0	17	0	1	0	18	4	18	0	0	2	0	5	2	1	0	0	0	4	11	0	2	7	3	5	0	94	6	20
ENSG00000230523	ENSG00000230523	LINC01756	long intergenic non-protein coding RNA 1756 [Source:HGNC Symbol;Acc:HGNC:52545]	lncRNA	0	3	0	1	4	0	0	0	0	4	0	2	0	0	1	0	0	1	1	0	0	1	0	0	0	0	0	0	0	0	1	0	0	0	13	6	3	0	3	0	9	2	32	10	20
ENSG00000116138	ENSG00000116138	DNAJC16	DnaJ heat shock protein family (Hsp40) member C16 [Source:HGNC Symbol;Acc:HGNC:29157]	protein_coding	22	180	22	120	147	146	115	72	92	163	175	207	269	222	76	92	76	156	37	179	141	109	114	132	75	159	54	144	208	314	113	54	64	85	143	17	65	46	143	1	37	67	82	47	247
ENSG00000158161	ENSG00000158161	EYA3	EYA transcriptional coactivator and phosphatase 3 [Source:HGNC Symbol;Acc:HGNC:3521]	protein_coding	73	185	17	44	91	284	67	137	63	747	159	219	93	97	47	310	21	365	43	134	32	362	246	257	32	246	75	246	157	294	146	112	54	188	94	18	8	263	227	1033	102	6	221	255	17
ENSG00000142684	ENSG00000142684	ZNF593	zinc finger protein 593 [Source:HGNC Symbol;Acc:HGNC:30943]	protein_coding	119	421	69	48	196	216	296	131	58	106	136	347	187	180	77	100	54	156	27	88	175	225	153	146	21	204	50	105	252	259	109	126	66	507	118	395	236	410	123	413	169	464	1159	394	232
ENSG00000234619	ENSG00000234619	RPL7P11	ribosomal protein L7 pseudogene 11 [Source:HGNC Symbol;Acc:HGNC:35667]	processed_pseudogene	0	8	0	2	3	22	4	3	0	0	1	3	6	6	3	1	4	3	0	1	1	13	8	3	17	21	0	1	2	27	0	1	0	2	0	0	0	0	2	0	0	4	2	10	0
ENSG00000121769	ENSG00000121769	FABP3	fatty acid binding protein 3 [Source:HGNC Symbol;Acc:HGNC:3557]	protein_coding	97	80	46	37	286	57	112	44	50	61	59	131	78	232	49	36	21	47	26	44	185	167	167	109	9	46	48	57	265	62	95	8	43	82	370	4	42	31	133	885	258	180	0	646	98
ENSG00000142627	ENSG00000142627	EPHA2	EPH receptor A2 [Source:HGNC Symbol;Acc:HGNC:3386]	protein_coding	44	9	8	18	2	42	122	12	9	72	0	69	86	11	15	0	3	38	16	5	133	13	119	59	0	3	4	5	220	4	9	27	17	129	1	20	79	0	97	259	9	2	59	80	45
ENSG00000284668	ENSG00000284668	LINC02780	long intergenic non-protein coding RNA 2780 [Source:HGNC Symbol;Acc:HGNC:54300]	lncRNA	0	13	0	0	0	0	0	0	0	0	0	0	0	2	0	5	1	3	0	2	2	1	2	0	3	0	1	8	14	21	1	0	0	0	3	2	3	0	3	26	0	0	0	31	5
ENSG00000142632	ENSG00000142632	ARHGEF19	Rho guanine nucleotide exchange factor 19 [Source:HGNC Symbol;Acc:HGNC:26604]	protein_coding	29	43	18	28	164	78	52	43	24	230	73	136	164	179	65	112	37	73	10	96	102	99	107	81	2	122	100	121	320	64	36	77	69	588	0	16	65	7	271	201	3	6	45	43	34
ENSG00000234593	ENSG00000234593	KAZN-AS1	KAZN antisense RNA 1 [Source:HGNC Symbol;Acc:HGNC:53610]	lncRNA	1	16	0	0	0	2	0	9	3	33	0	1	0	0	2	12	2	40	0	15	17	30	7	1	5	40	4	36	8	0	3	0	0	1	40	3	2	0	1	2	0	0	4	40	15
ENSG00000158292	ENSG00000158292	GPR153	G protein-coupled receptor 153 [Source:HGNC Symbol;Acc:HGNC:23618]	protein_coding	28	44	46	13	149	107	34	23	14	4	63	209	59	4	66	2	27	11	31	0	63	5	155	24	2	85	11	14	207	47	111	54	25	70	6	38	44	162	177	137	9	7	60	44	43
ENSG00000270605	ENSG00000270605		novel transcript	lncRNA	2	9	0	5	2	10	7	1	7	2	0	33	9	13	7	0	0	27	3	13	7	4	13	1	20	24	15	19	3	0	12	0	0	10	28	44	3	0	14	21	0	2	0	29	22
ENSG00000189337	ENSG00000189337	KAZN	kazrin, periplakin interacting protein [Source:HGNC Symbol;Acc:HGNC:29173]	protein_coding	341	514	178	148	633	474	940	318	248	479	463	678	320	135	191	390	76	575	199	150	669	465	1166	583	98	474	253	196	693	482	251	268	211	1148	283	249	583	751	645	577	571	680	178	100	102
ENSG00000232912	ENSG00000232912	RERE-AS1	RERE antisense RNA 1 [Source:HGNC Symbol;Acc:HGNC:40501]	lncRNA	19	13	7	0	5	0	16	1	2	21	3	2	0	0	14	18	0	20	4	32	5	41	5	8	2	0	15	37	2	19	25	10	9	8	17	24	3	1	2	1	0	1	3	7	9
ENSG00000235084	ENSG00000235084	CHCHD2P6	coiled-coil-helix-coiled-coil-helix domain containing 2 pseudogene 6 [Source:HGNC Symbol;Acc:HGNC:39590]	processed_pseudogene	11	16	1	5	11	15	8	10	12	27	3	26	16	5	18	2	1	18	8	8	31	7	26	13	7	18	16	16	15	35	6	8	10	27	2	1	23	98	7	2	1	29	1	1	4
ENSG00000235143	ENSG00000235143		novel transcript	lncRNA	0	4	0	0	0	0	0	0	0	7	0	1	0	0	0	0	0	2	0	1	0	0	1	0	0	1	0	2	0	0	1	0	0	0	3	4	0	0	4	0	0	0	24	21	13
ENSG00000225478	ENSG00000225478		MT-ND1 (MT-ND1) pseudogene	processed_pseudogene	0	0	2	6	2	8	0	0	0	1	0	0	0	0	18	0	0	7	2	2	5	1	0	6	0	1	0	2	5	0	0	0	0	1	0	0	0	0	3	0	0	0	0	0	0
ENSG00000225077	ENSG00000225077	ICMT-DT	ICMT divergent transcript [Source:HGNC Symbol;Acc:HGNC:28620]	lncRNA	21	32	7	18	67	26	22	33	9	57	12	42	24	15	31	27	22	45	8	34	52	77	29	13	15	43	29	24	62	70	13	11	6	55	23	7	30	27	23	39	1	44	10	15	24
ENSG00000028137	ENSG00000028137	TNFRSF1B	TNF receptor superfamily member 1B [Source:HGNC Symbol;Acc:HGNC:11917]	protein_coding	877	536	439	254	1945	537	3232	243	588	732	519	3742	1176	487	344	722	269	635	465	537	838	696	1013	445	112	997	619	518	1320	1627	599	604	301	2229	506	18	2032	9	933	1076	28	1047	16	119	1013
ENSG00000204464	ENSG00000204464	TMEM51-AS2	TMEM51 antisense RNA 2 [Source:HGNC Symbol;Acc:HGNC:32332]	lncRNA	0	1	0	8	0	0	0	0	0	8	0	1	0	1	0	0	0	0	0	2	0	4	0	0	0	0	0	0	0	0	1	0	0	0	0	0	0	5	0	0	0	0	0	2	4
ENSG00000233372	ENSG00000233372		novel transcript	lncRNA	0	0	0	0	3	0	0	0	1	0	0	0	0	0	0	0	0	0	0	0	0	0	0	0	0	0	6	0	0	25	5	0	0	0	0	4	0	3	1	0	0	0	0	19	4
ENSG00000284543	ENSG00000284543	LINC01226	long intergenic non-protein coding RNA 1226 [Source:HGNC Symbol;Acc:HGNC:49678]	lncRNA	49	82	55	100	208	148	191	109	62	164	50	159	74	56	110	155	69	100	38	79	366	244	197	50	49	54	54	67	132	85	96	48	67	181	106	103	100	50	110	161	87	2	64	64	104
ENSG00000130939	ENSG00000130939	UBE4B	ubiquitination factor E4B [Source:HGNC Symbol;Acc:HGNC:12500]	protein_coding	233	383	61	72	558	185	308	140	218	258	216	466	435	354	281	272	123	370	85	155	425	269	313	279	74	402	292	290	921	558	113	132	104	278	322	15	183	286	193	267	9	2	13	67	36
ENSG00000175147	ENSG00000175147	TMEM51-AS1	TMEM51 antisense RNA 1 [Source:HGNC Symbol;Acc:HGNC:26301]	lncRNA	16	119	22	69	44	92	97	26	18	168	0	2	1	8	53	4	5	81	17	30	56	80	97	132	16	66	48	83	118	140	38	42	13	110	160	43	38	1	88	99	7	14	135	121	107
ENSG00000127472	ENSG00000127472	PLA2G5	phospholipase A2 group V [Source:HGNC Symbol;Acc:HGNC:9038]	protein_coding	76	11	112	34	241	9	199	7	64	1	210	4	557	25	392	3	61	61	51	59	664	23	574	54	72	1	178	50	1350	27	262	1	106	19	695	21	371	3	792	1	1691	3	44	15	25
ENSG00000060656	ENSG00000060656	PTPRU	protein tyrosine phosphatase receptor type U [Source:HGNC Symbol;Acc:HGNC:9683]	protein_coding	1	13	0	10	178	18	39	3	3	30	0	0	30	30	6	1	7	2	10	16	107	37	6	23	4	11	5	19	128	17	34	7	5	2	57	17	10	6	67	34	14	5	67	158	78
ENSG00000163867	ENSG00000163867	ZMYM6	zinc finger MYM-type containing 6 [Source:HGNC Symbol;Acc:HGNC:13050]	protein_coding	309	415	111	290	323	380	383	291	192	668	331	982	301	479	268	360	103	526	162	242	422	402	388	206	71	293	374	417	711	665	320	230	85	688	536	700	185	294	297	201	2431	1170	2	40	47
ENSG00000189280	ENSG00000189280	GJB5	gap junction protein beta 5 [Source:HGNC Symbol;Acc:HGNC:4287]	protein_coding	5	0	0	0	0	30	0	0	6	1	0	0	0	0	1	12	0	12	0	1	0	34	0	46	5	1	1	0	0	1	0	0	0	0	3	1	1	3	1	0	4	0	0	4	8
ENSG00000134698	ENSG00000134698	AGO4	argonaute RISC component 4 [Source:HGNC Symbol;Acc:HGNC:18424]	protein_coding	3340	2187	510	765	3646	2071	5885	1380	1920	1814	2451	4550	2263	1584	987	3935	1443	2795	800	1056	1441	2004	3678	1901	173	3068	2385	2781	2910	5329	1373	1749	1152	5964	1274	2740	2530	1015	1643	1404	1730	271	48	133	723
ENSG00000134690	ENSG00000134690	CDCA8	cell division cycle associated 8 [Source:HGNC Symbol;Acc:HGNC:14629]	protein_coding	48	361	19	17	345	225	33	218	122	597	41	353	125	400	3	223	46	454	15	149	46	164	364	585	18	560	376	526	100	764	47	80	22	144	2	4	384	915	50	384	2	840	27	15	15
ENSG00000272420	ENSG00000272420		novel transcript, sense intronic to MORN1	lncRNA	0	3	0	3	4	5	3	1	4	0	0	0	0	0	4	0	0	0	0	14	0	0	4	0	4	1	5	3	7	8	4	0	0	0	7	0	0	0	26	0	0	0	6	0	6
ENSG00000132881	ENSG00000132881	CPLANE2	ciliogenesis and planar polarity effector complex subunit 2 [Source:HGNC Symbol;Acc:HGNC:28127]	protein_coding	21	12	8	10	14	19	8	6	4	75	0	57	29	31	25	10	17	31	10	20	58	75	27	15	14	39	8	10	19	37	6	6	1	10	9	7	1	2	3	71	6	0	13	14	5
ENSG00000273274	ENSG00000273274	ZBTB8B	zinc finger and BTB domain containing 8B [Source:HGNC Symbol;Acc:HGNC:37057]	protein_coding	2	32	5	26	29	34	41	9	11	86	0	2	1	5	16	5	14	30	2	82	2	94	41	21	17	18	8	54	45	126	9	0	4	3	57	18	10	4	29	3	2	2	78	88	31
ENSG00000116251	ENSG00000116251	RPL22	ribosomal protein L22 [Source:HGNC Symbol;Acc:HGNC:10315]	protein_coding	516	1028	278	408	1534	785	1086	438	275	1007	607	1947	792	887	417	725	278	927	284	379	1207	757	1332	670	111	843	526	744	1569	1009	606	311	375	1562	768	701	762	1063	585	1071	1397	1074	309	2686	506
ENSG00000272510	ENSG00000272510		novel transcript, antisense to DNAJC16	lncRNA	0	7	0	5	7	8	7	1	5	10	8	7	21	11	1	3	12	10	0	5	11	0	7	4	1	10	6	10	3	18	5	2	6	7	0	0	0	1	0	0	5	0	0	0	7
ENSG00000158286	ENSG00000158286	RNF207	ring finger protein 207 [Source:HGNC Symbol;Acc:HGNC:32947]	protein_coding	11	30	7	6	20	30	7	18	5	38	0	25	1	6	12	21	27	31	7	13	24	27	20	20	13	30	10	29	24	15	24	8	7	6	314	26	26	10	91	80	9	2	73	91	72
ENSG00000236648	ENSG00000236648	LINC02810	long intergenic non-protein coding RNA 2810 [Source:HGNC Symbol;Acc:HGNC:54342]	lncRNA	1	9	0	11	0	14	2	0	3	7	0	0	2	0	7	0	2	1	0	24	0	25	2	1	3	13	6	27	0	19	32	0	0	0	1	0	1	0	2	0	0	0	0	11	10
ENSG00000232273	ENSG00000232273	FTH1P1	ferritin heavy chain 1 pseudogene 1 [Source:HGNC Symbol;Acc:HGNC:3979]	processed_pseudogene	4	15	6	5	9	1	13	4	8	2	4	7	3	7	3	6	3	3	6	15	6	17	6	6	2	1	1	2	10	5	3	0	2	11	0	0	0	1	5	5	0	1	2	2	8
ENSG00000009709	ENSG00000009709	PAX7	paired box 7 [Source:HGNC Symbol;Acc:HGNC:8621]	protein_coding	2	17	1	12	14	13	3	5	7	38	0	1	0	0	9	1	0	11	0	14	3	19	8	4	3	14	6	7	8	28	7	2	0	0	3	23	11	0	1	2	11	6	67	45	49
ENSG00000223589	ENSG00000223589		FK506 binding protein 3, 25kDa (FKBP3) pseudogene	processed_pseudogene	0	3	0	1	6	0	0	7	5	21	0	0	0	0	43	0	5	19	0	5	0	39	5	2	8	9	8	7	9	19	18	0	2	3	43	1	9	0	3	0	0	0	5	15	1
ENSG00000158008	ENSG00000158008	EXTL1	exostosin like glycosyltransferase 1 [Source:HGNC Symbol;Acc:HGNC:3515]	protein_coding	3	13	2	3	13	19	2	5	1	15	0	7	2	4	2	3	0	41	0	21	59	71	3	23	2	22	11	19	17	26	10	6	0	5	107	13	13	56	5	6	13	4	78	59	43
ENSG00000130940	ENSG00000130940	CASZ1	castor zinc finger 1 [Source:HGNC Symbol;Acc:HGNC:26002]	protein_coding	34	60	19	61	69	46	29	46	29	70	61	137	13	22	20	58	43	71	17	60	27	105	55	74	6	108	53	75	155	147	50	51	29	65	102	42	46	19	15	13	38	4	150	255	161
ENSG00000116771	ENSG00000116771	AGMAT	agmatinase [Source:HGNC Symbol;Acc:HGNC:18407]	protein_coding	6	35	4	29	68	49	10	7	14	18	11	100	9	36	34	19	16	49	6	17	9	44	50	17	25	28	15	30	23	52	7	20	1	60	7	6	13	12	41	5	2	302	97	79	80
ENSG00000237301	ENSG00000237301		novel transcript	lncRNA	0	6	2	7	3	6	1	2	3	50	0	1	0	8	22	3	11	5	1	20	1	6	12	8	1	6	12	19	30	11	5	4	2	25	2	30	15	1	8	4	4	0	0	43	20
ENSG00000162585	ENSG00000162585	FAAP20	FA core complex associated protein 20 [Source:HGNC Symbol;Acc:HGNC:26428]	protein_coding	292	244	94	113	449	332	504	159	124	274	204	614	362	203	162	217	119	314	91	82	474	307	430	250	47	268	203	251	519	418	225	147	159	675	654	1324	686	716	473	583	757	1255	186	648	261
ENSG00000163879	ENSG00000163879	DNALI1	dynein axonemal light intermediate chain 1 [Source:HGNC Symbol;Acc:HGNC:14353]	protein_coding	31	73	17	15	122	33	99	22	12	94	93	74	41	41	93	22	51	90	15	26	120	46	159	27	12	54	38	39	253	118	54	28	38	56	22	57	41	4	139	83	0	29	0	197	35
ENSG00000227527	ENSG00000227527		novel transcript	lncRNA	0	19	2	5	3	9	0	1	8	18	0	1	0	3	10	6	0	2	3	2	31	7	1	21	12	4	3	19	6	11	13	0	0	17	26	3	0	10	2	0	1	0	7	0	6
ENSG00000116954	ENSG00000116954	RRAGC	Ras related GTP binding C [Source:HGNC Symbol;Acc:HGNC:19902]	protein_coding	134	156	32	73	144	127	121	75	105	186	62	282	230	188	166	109	65	188	63	101	74	262	262	158	74	167	126	230	285	229	176	114	57	218	90	11	167	147	117	55	317	35	12	12	89
ENSG00000228589	ENSG00000228589	SPCS2P4	signal peptidase complex subunit 2 pseudogene 4 [Source:HGNC Symbol;Acc:HGNC:45237]	processed_pseudogene	22	19	12	9	46	12	32	8	4	15	10	42	24	16	10	18	5	12	5	14	25	29	32	21	5	23	15	13	34	22	13	11	16	22	1	0	27	3	36	5	14	3	22	12	5
ENSG00000163873	ENSG00000163873	GRIK3	glutamate ionotropic receptor kainate type subunit 3 [Source:HGNC Symbol;Acc:HGNC:4581]	protein_coding	3	4	0	11	28	20	0	3	1	67	0	21	1	0	30	5	9	28	0	30	2	83	12	12	3	20	7	28	7	22	5	4	4	30	125	26	17	12	19	61	10	2	54	98	78
ENSG00000117215	ENSG00000117215	PLA2G2D	phospholipase A2 group IID [Source:HGNC Symbol;Acc:HGNC:9033]	protein_coding	0	6	0	3	3	13	10	2	13	27	0	17	0	32	20	5	4	14	5	14	0	22	7	10	8	1	8	16	3	10	24	1	0	14	9	8	2	3	2	30	13	0	2	75	15
ENSG00000196449	ENSG00000196449	YRDC	yrdC N6-threonylcarbamoyltransferase domain containing [Source:HGNC Symbol;Acc:HGNC:28905]	protein_coding	326	587	134	107	532	189	713	273	125	241	89	737	276	267	165	210	90	545	154	179	605	559	532	291	40	476	159	391	650	591	260	179	201	1001	233	3	455	900	401	475	947	195	10	8	57
ENSG00000230163	ENSG00000230163		novel transcript	lncRNA	22	18	0	0	23	24	3	0	1	21	0	49	11	22	2	1	15	5	2	9	18	24	19	5	0	8	11	6	0	13	20	12	1	17	3	2	1	36	3	1	0	0	0	29	5
ENSG00000227538	ENSG00000227538	HNRNPFP1	heterogeneous nuclear ribonucleoprotein F pseudogene 1 [Source:HGNC Symbol;Acc:HGNC:48812]	processed_pseudogene	1	11	0	1	4	22	0	0	2	0	0	0	0	3	7	2	0	1	0	6	2	8	9	0	21	2	4	7	6	11	5	3	0	0	2	0	0	0	4	0	2	0	0	7	9
ENSG00000232208	ENSG00000232208		zinc finger protein 271 (ZNF) pseudogene	processed_pseudogene	2	7	0	7	18	6	3	8	0	1	14	11	0	2	21	0	14	8	3	8	0	0	0	6	2	11	4	8	5	14	2	0	1	4	0	0	0	0	23	0	0	0	0	0	3
ENSG00000236500	ENSG00000236500	CD24P1	CD24 molecule pseudogene 1 [Source:HGNC Symbol;Acc:HGNC:1646]	processed_pseudogene	0	5	0	3	1	5	0	0	0	4	0	0	0	0	1	0	4	1	1	5	4	0	5	11	14	6	7	8	1	0	0	5	0	9	46	92	17	0	20	12	0	0	0	0	2
ENSG00000044012	ENSG00000044012	GUCA2B	guanylate cyclase activator 2B [Source:HGNC Symbol;Acc:HGNC:4683]	protein_coding	0	1	1	3	0	9	0	0	0	1	0	1	3	4	1	0	0	21	0	9	0	21	0	5	0	2	1	4	0	0	0	0	0	0	4	2	2	1	1	0	0	2	0	11	5
ENSG00000179051	ENSG00000179051	RCC2	regulator of chromosome condensation 2 [Source:HGNC Symbol;Acc:HGNC:30297]	protein_coding	278	1006	104	304	57	459	310	518	408	1228	493	1701	396	1195	268	500	163	1071	198	365	788	1035	545	676	111	1475	1008	1741	836	1787	290	404	165	1245	350	322	576	1228	236	408	14	651	33	74	522
ENSG00000231868	ENSG00000231868		novel transcript, antisense to ESPN	lncRNA	0	2	0	2	3	0	2	1	1	3	0	1	0	2	1	3	5	2	6	2	3	4	1	0	1	2	0	2	4	1	3	1	1	5	9	1	9	0	5	5	0	0	0	21	7
ENSG00000284650	ENSG00000284650		novel transcript	lncRNA	0	0	0	0	13	3	3	1	3	0	0	0	0	0	0	0	0	6	0	12	0	9	0	1	2	1	1	4	1	0	0	0	0	0	1	0	0	4	0	0	1	0	0	0	3
ENSG00000237329	ENSG00000237329		TAF9 RNA polymerase II, TATA box binding protein (TBP)-associated factor, 32kDa (TAF9) pseudogene	processed_pseudogene	0	0	1	2	1	0	0	0	0	0	0	0	0	0	15	0	2	20	0	1	0	34	2	0	11	0	5	1	0	0	0	0	0	0	0	3	0	0	0	8	0	0	2	0	1
ENSG00000236948	ENSG00000236948		novel transcript	lncRNA	2	0	0	1	3	11	0	1	5	17	0	7	0	1	0	2	1	0	2	11	3	7	10	8	7	5	1	0	4	10	1	5	0	13	5	40	4	0	1	0	0	0	0	11	16
ENSG00000126067	ENSG00000126067	PSMB2	proteasome 20S subunit beta 2 [Source:HGNC Symbol;Acc:HGNC:9539]	protein_coding	737	3028	256	696	1529	1321	1210	1263	479	2039	972	3827	1192	2273	576	991	406	2410	335	1207	1420	2271	1648	1659	200	2307	1211	1958	1780	2254	707	872	450	2758	961	1298	1206	2577	1134	2056	2632	3564	14	29	158
ENSG00000274944	ENSG00000274944		novel protein	protein_coding	550	854	122	128	580	597	691	425	268	1063	416	1336	491	651	175	379	146	464	158	258	313	669	642	538	69	815	630	1172	533	897	257	230	133	1093	88	246	288	501	304	127	359	523	849	333	69
ENSG00000132906	ENSG00000132906	CASP9	caspase 9 [Source:HGNC Symbol;Acc:HGNC:1511]	protein_coding	253	222	39	30	434	229	297	149	184	78	200	513	298	210	215	161	152	295	66	192	423	215	311	123	42	394	306	211	345	338	167	117	72	483	157	579	536	4	241	461	3	2	49	15	31
ENSG00000197312	ENSG00000197312	DDI2	DNA damage inducible 1 homolog 2 [Source:HGNC Symbol;Acc:HGNC:24578]	protein_coding	125	475	73	67	241	140	134	156	126	330	256	912	339	345	278	363	41	363	163	188	254	454	512	605	131	519	63	399	534	778	61	166	91	381	710	13	240	475	45	72	0	74	303	62	167
ENSG00000272078	ENSG00000272078		novel transcript, antisense to CASZ1	lncRNA	20	19	2	24	47	8	13	21	8	14	27	31	5	12	0	24	7	16	2	25	0	43	26	33	0	39	26	37	48	46	17	18	11	21	29	27	14	7	3	6	11	2	82	158	69
ENSG00000173660	ENSG00000173660	UQCRH	ubiquinol-cytochrome c reductase hinge protein [Source:HGNC Symbol;Acc:HGNC:12590]	protein_coding	537	1391	235	320	1092	797	992	713	308	1393	462	1791	640	1286	325	884	146	1299	251	391	923	1156	1058	1218	146	1676	770	1090	1282	1171	292	349	274	1977	508	1472	785	3031	1040	1821	2306	3098	5627	1182	827
ENSG00000224592	ENSG00000224592	MIR3659HG	MIR3659 host gene [Source:HGNC Symbol;Acc:HGNC:54306]	lncRNA	0	0	1	1	4	22	1	1	7	10	0	0	0	1	9	0	13	4	0	18	0	18	1	3	1	7	2	3	2	20	3	0	3	0	2	6	32	1	0	0	7	0	4	18	25
ENSG00000233728	ENSG00000233728		novel transcript	lncRNA	0	12	0	0	0	0	1	0	2	0	0	100	4	0	29	0	0	25	3	27	30	8	38	12	0	16	0	21	17	56	2	8	13	26	4	7	0	0	3	0	0	0	0	0	4
ENSG00000231606	ENSG00000231606		novel transcript	lncRNA	7	5	4	23	16	28	1	2	12	2	1	0	17	11	9	0	4	1	0	18	13	11	12	0	6	0	0	24	0	0	2	11	1	0	94	7	4	2	1	0	0	0	0	4	2
ENSG00000215900	ENSG00000215900	SELENOWP1	selenoprotein W pseudogene 1 [Source:HGNC Symbol;Acc:HGNC:10753]	processed_pseudogene	2	7	3	5	5	14	0	6	3	23	0	0	0	0	11	0	0	3	0	2	2	11	20	0	3	13	2	1	0	0	1	2	1	6	0	0	4	0	0	0	7	0	0	4	3
ENSG00000284632	ENSG00000284632		novel transcript	lncRNA	0	1	0	1	0	17	0	3	1	12	0	0	0	0	8	1	0	2	0	10	1	6	0	17	1	7	0	3	0	12	0	0	0	5	6	3	0	0	0	0	0	0	0	16	8
ENSG00000241014	ENSG00000241014	GPR199P	G protein-coupled receptor 199, pseudogene [Source:HGNC Symbol;Acc:HGNC:55170]	transcribed_unitary_pseudogene	7	7	0	3	59	0	11	0	0	0	22	1	0	14	0	2	0	4	6	1	0	1	0	16	0	10	11	17	44	0	4	0	8	35	0	1	0	1	0	67	11	1	13	43	8
ENSG00000054118	ENSG00000054118	THRAP3	thyroid hormone receptor associated protein 3 [Source:HGNC Symbol;Acc:HGNC:22964]	protein_coding	837	1475	306	298	1577	1154	945	696	561	1278	1145	3399	1119	1124	549	814	328	1790	334	869	1004	1212	1643	1539	142	2034	1203	1399	1981	2805	548	709	458	1741	663	245	819	45	863	1193	1555	2019	5085	1725	304
ENSG00000254553	ENSG00000254553		novel transcript	protein_coding	23	15	38	48	196	38	170	28	36	205	6	123	59	44	44	3	62	45	20	23	112	73	215	61	31	56	27	23	87	36	65	29	12	29	76	4	53	1	79	148	2	0	18	577	26
ENSG00000284653	ENSG00000284653		novel transcript	lncRNA	0	0	0	1	1	4	0	0	4	45	0	0	0	1	0	1	0	6	0	1	8	0	0	0	5	1	1	1	0	24	4	1	0	0	0	4	1	0	0	0	0	0	26	24	16
ENSG00000237749	ENSG00000237749		ribosomal protein S27 (metallopanstimulin 1) (RPS27) pseudogene	processed_pseudogene	4	4	0	19	16	12	8	5	2	8	8	28	3	6	4	8	8	22	2	13	4	32	9	6	0	7	5	12	5	67	4	7	4	19	0	0	1	0	1	1	0	0	12	2	1
ENSG00000276747	ENSG00000276747	PADI6	peptidyl arginine deiminase 6 [Source:HGNC Symbol;Acc:HGNC:20449]	protein_coding	3	9	0	9	7	20	2	1	0	41	0	34	0	1	4	1	0	23	0	29	3	63	6	11	5	11	12	10	4	64	11	16	1	1	6	4	15	2	3	5	0	0	0	50	37
ENSG00000284705	ENSG00000284705		novel transcript	lncRNA	0	0	2	14	0	1	0	0	0	23	0	0	0	0	0	0	2	9	0	16	2	49	5	17	3	7	1	5	1	21	2	0	0	41	82	1	0	3	3	3	3	3	0	18	16
ENSG00000228776	ENSG00000228776		ribosomal protein L21 (RPL21) pseudogene	processed_pseudogene	0	4	0	5	12	0	0	0	8	7	0	0	1	0	0	5	1	0	0	0	0	9	7	2	0	1	1	2	3	1	0	0	0	1	3	19	3	0	0	1	0	3	0	25	5
ENSG00000159339	ENSG00000159339	PADI4	peptidyl arginine deiminase 4 [Source:HGNC Symbol;Acc:HGNC:18368]	protein_coding	7981	4751	405	283	6261	7606	11803	4681	4549	12191	5073	4234	3195	1939	1006	5049	3628	6061	1649	619	2170	6500	9065	5110	407	5567	5778	3860	7342	8829	2743	2519	1147	11095	4047	4535	4555	3060	2294	6343	7634	18177	14590	6958	6259
ENSG00000197982	ENSG00000197982	C1orf122	chromosome 1 open reading frame 122 [Source:HGNC Symbol;Acc:HGNC:24789]	protein_coding	326	543	137	124	653	239	703	258	140	391	149	734	360	289	213	267	148	506	127	176	771	502	624	325	54	497	199	411	821	449	359	219	178	1062	522	117	542	990	459	993	1475	393	2	375	405
ENSG00000261781	ENSG00000261781	LINC01654	long intergenic non-protein coding RNA 1654 [Source:HGNC Symbol;Acc:HGNC:52442]	lncRNA	0	0	0	24	0	1	0	0	0	1	0	4	0	1	2	0	3	0	0	3	0	3	0	1	1	1	0	4	1	22	0	0	0	0	3	1	0	3	2	16	0	0	0	36	7
ENSG00000183317	ENSG00000183317	EPHA10	EPH receptor A10 [Source:HGNC Symbol;Acc:HGNC:19987]	protein_coding	1	22	9	18	24	53	1	11	2	30	0	5	1	3	9	6	18	45	1	44	42	124	22	18	21	13	5	35	16	40	29	6	2	15	35	12	18	10	31	7	6	1	117	157	86
ENSG00000183386	ENSG00000183386	FHL3	four and a half LIM domains 3 [Source:HGNC Symbol;Acc:HGNC:3704]	protein_coding	420	546	142	108	636	327	546	146	167	440	219	365	881	711	207	459	176	219	165	116	270	204	476	300	61	439	356	321	493	508	399	113	143	693	87	974	866	126	297	502	9	557	12	17	601
ENSG00000158315	ENSG00000158315	RHBDL2	rhomboid like 2 [Source:HGNC Symbol;Acc:HGNC:16083]	protein_coding	3	16	8	17	34	42	26	6	10	34	5	18	0	7	3	24	0	21	4	13	47	1	23	16	13	25	18	8	14	24	23	8	1	21	0	2	1	0	49	5	0	0	2	14	292
ENSG00000204084	ENSG00000204084	INPP5B	inositol polyphosphate-5-phosphatase B [Source:HGNC Symbol;Acc:HGNC:6077]	protein_coding	151	449	44	122	554	237	226	211	110	506	172	697	356	623	170	289	72	452	40	211	604	385	197	496	48	540	457	245	401	1035	92	178	120	292	91	61	119	50	575	656	0	1	42	74	41
ENSG00000271806	ENSG00000271806		novel transcript, antisense PRKCZ	lncRNA	43	29	10	37	38	37	5	6	28	25	12	41	31	13	19	2	4	21	12	23	60	24	23	10	19	16	15	25	47	45	27	14	8	46	34	168	28	9	68	33	0	8	1	16	85
ENSG00000146463	ENSG00000146463	ZMYM4	zinc finger MYM-type containing 4 [Source:HGNC Symbol;Acc:HGNC:13055]	protein_coding	375	1247	174	340	1731	454	455	467	384	1038	508	1402	611	903	406	692	158	604	214	468	1569	973	976	661	118	727	695	493	1232	782	353	266	273	1346	435	490	232	6	848	535	442	247	3	100	28
ENSG00000183520	ENSG00000183520	UTP11	UTP11 small subunit processome component [Source:HGNC Symbol;Acc:HGNC:24329]	protein_coding	316	1059	128	215	911	426	399	446	244	922	310	1495	600	755	343	453	158	758	104	296	692	909	640	625	95	752	364	613	904	1087	316	267	224	1059	359	760	416	954	677	717	983	1259	2344	40	269
ENSG00000271741	ENSG00000271741		novel transcript, ZMYM6-ZMYM6NB readthrough	protein_coding	359	365	135	245	525	343	663	261	223	665	401	1167	381	544	279	321	104	438	180	201	591	542	468	235	82	272	444	396	1058	604	314	233	129	711	394	760	374	257	419	441	2357	952	10	12	403
ENSG00000214141	ENSG00000214141	ACTN4P2	actinin alpha 4 pseudogene 2 [Source:HGNC Symbol;Acc:HGNC:44032]	processed_pseudogene	1	0	0	0	0	0	0	0	0	0	0	0	0	0	1	1	0	0	0	13	1	0	0	0	7	0	0	0	0	0	1	4	0	0	8	2	7	0	0	0	0	0	0	13	21
ENSG00000142686	ENSG00000142686	C1orf216	chromosome 1 open reading frame 216 [Source:HGNC Symbol;Acc:HGNC:26800]	protein_coding	271	635	125	284	396	448	496	372	200	390	347	1050	687	351	272	461	118	398	165	259	1036	746	824	176	109	274	361	465	1442	524	188	196	206	1056	230	4	630	5	484	1101	26	1517	4	18	24
ENSG00000279096	ENSG00000279096		TEC	TEC	2	28	1	6	5	2	1	2	3	2	0	1	1	0	6	0	6	2	1	12	2	9	6	27	2	0	4	6	19	97	21	1	0	26	0	30	0	0	18	0	4	0	5	26	7
ENSG00000117148	ENSG00000117148	ACTL8	actin like 8 [Source:HGNC Symbol;Acc:HGNC:24018]	protein_coding	2	5	0	4	1	4	0	0	0	5	0	0	0	0	5	1	6	17	0	3	0	3	4	0	0	2	5	6	25	0	9	7	0	0	12	6	1	1	14	0	3	0	0	16	11
ENSG00000230585	ENSG00000230585	PHB1P12	PHB1 pseudogene 12 [Source:HGNC Symbol;Acc:HGNC:39291]	processed_pseudogene	12	7	7	0	38	17	0	3	7	4	21	0	0	0	15	0	3	28	0	3	5	21	7	5	8	12	14	12	9	3	7	0	0	0	0	1	1	0	56	1	0	0	0	3	5
ENSG00000117000	ENSG00000117000	RLF	RLF zinc finger [Source:HGNC Symbol;Acc:HGNC:10025]	protein_coding	346	507	119	136	732	158	388	217	177	361	155	1035	498	514	97	317	56	689	114	238	842	411	607	255	38	540	217	322	789	693	226	198	203	435	5	0	229	0	2	107	986	274	48	4	13
ENSG00000284989	ENSG00000284989		novel transcript	protein_coding	309	646	123	182	1063	601	534	358	229	811	163	802	574	371	360	491	265	609	157	260	701	359	936	831	124	759	598	505	972	691	199	237	213	1424	731	21	340	344	777	524	10	434	0	56	119
ENSG00000092853	ENSG00000092853	CLSPN	claspin [Source:HGNC Symbol;Acc:HGNC:19715]	protein_coding	20	304	26	148	78	165	12	141	68	411	80	366	161	277	226	49	44	296	11	259	111	289	75	279	96	374	275	464	72	532	95	81	20	116	268	431	37	379	144	238	3	84	144	52	55
ENSG00000255811	ENSG00000255811		novel transcript, antisense to GJB4 and GJB3	lncRNA	8	8	0	1	8	4	0	1	0	9	0	0	0	0	14	0	0	0	0	4	0	5	0	1	0	3	1	4	0	4	1	3	0	0	2	5	5	1	0	23	0	0	0	16	2
ENSG00000134697	ENSG00000134697	GNL2	G protein nucleolar 2 [Source:HGNC Symbol;Acc:HGNC:29925]	protein_coding	500	1880	255	446	1153	1033	873	817	346	1655	583	2852	1208	1375	578	1032	420	1675	215	772	1442	1471	1021	1348	165	1825	639	1082	1771	2510	579	570	317	2009	611	1184	675	41	299	2213	60	1773	55	3489	599
ENSG00000187513	ENSG00000187513	GJA4	gap junction protein alpha 4 [Source:HGNC Symbol;Acc:HGNC:4278]	protein_coding	105	159	25	44	102	131	39	82	48	130	54	35	79	216	22	110	61	47	17	32	172	191	283	137	16	60	90	58	286	45	71	25	48	174	3	0	69	166	150	141	2	284	0	57	29
ENSG00000225142	ENSG00000225142		ribosomal protein L21 (RPL21) pseudogene	processed_pseudogene	2	0	0	0	6	7	0	2	5	5	0	1	6	1	10	0	1	25	0	9	0	1	0	0	3	5	7	8	2	0	4	0	0	6	3	0	0	23	0	0	0	0	22	1	2
ENSG00000230138	ENSG00000230138	LINC02812	long intergenic non-protein coding RNA 2812 [Source:HGNC Symbol;Acc:HGNC:54344]	lncRNA	10	10	3	17	69	11	10	2	8	8	22	26	12	6	17	10	7	12	4	36	7	43	2	9	3	24	8	14	31	33	11	9	0	18	94	4	2	1	12	44	4	82	8	19	10
ENSG00000223390	ENSG00000223390		novel transcript	lncRNA	38	83	5	14	62	49	58	44	15	63	26	90	53	54	21	26	8	51	21	32	6	31	75	39	1	72	33	50	77	110	24	20	19	119	95	5	18	52	15	99	0	6	0	12	13
ENSG00000285823	ENSG00000285823	LINC02793	long intergenic non-protein coding RNA 2793 [Source:HGNC Symbol;Acc:HGNC:54317]	lncRNA	0	8	0	0	0	0	0	2	0	2	0	1	12	0	0	1	1	6	0	3	0	15	0	17	1	8	0	1	0	0	2	1	0	0	85	1	6	1	0	1	0	1	0	3	2
ENSG00000284720	ENSG00000284720		novel transcript	lncRNA	0	8	0	7	10	12	0	4	0	8	0	0	0	0	3	0	0	0	0	11	0	3	1	0	1	0	2	2	0	3	0	0	0	0	3	1	1	0	3	0	0	0	47	20	9
ENSG00000225028	ENSG00000225028		novel transcript	lncRNA	0	1	0	0	0	6	1	0	0	0	0	0	0	0	0	0	0	0	0	0	0	1	0	0	1	7	0	0	0	0	0	0	0	0	0	0	0	2	0	4	0	0	80	38	10
ENSG00000116151	ENSG00000116151	MORN1	MORN repeat containing 1 [Source:HGNC Symbol;Acc:HGNC:25852]	protein_coding	33	37	0	41	48	71	24	19	13	51	0	13	28	16	103	2	11	111	8	28	61	183	19	59	18	30	42	78	91	82	47	28	6	71	116	39	75	8	64	136	28	1	103	260	113
ENSG00000226147	ENSG00000226147	TUBBP10	tubulin beta class I pseudogene 10 [Source:HGNC Symbol;Acc:HGNC:42344]	processed_pseudogene	0	0	0	0	0	37	0	0	1	0	0	0	0	0	0	0	0	0	0	0	0	0	0	0	0	29	0	0	1	1	0	0	0	0	2	0	0	2	0	0	3	0	0	7	4
ENSG00000182873	ENSG00000182873	PRKCZ-AS1	PRKCZ antisense RNA 1 [Source:HGNC Symbol;Acc:HGNC:40477]	lncRNA	1	0	2	0	4	0	0	0	0	0	0	0	26	0	5	0	2	2	0	1	0	2	1	0	2	0	14	0	29	0	8	2	2	4	9	9	5	1	7	1	14	0	1	30	12
ENSG00000006555	ENSG00000006555	TTC22	tetratricopeptide repeat domain 22 [Source:HGNC Symbol;Acc:HGNC:26067]	protein_coding	40	29	5	19	156	15	79	10	20	78	32	46	44	15	30	1	9	44	3	31	18	18	101	61	19	17	46	28	14	52	40	15	10	38	14	32	82	3	18	105	2	9	7	109	36
ENSG00000236111	ENSG00000236111	RPL6P1	ribosomal protein L6 pseudogene 1 [Source:HGNC Symbol;Acc:HGNC:35972]	processed_pseudogene	1	10	0	5	8	16	5	2	3	24	1	0	1	0	12	1	2	12	6	20	2	32	3	0	2	15	3	14	1	2	0	0	1	1	114	0	0	0	17	0	2	0	0	0	2
ENSG00000066056	ENSG00000066056	TIE1	tyrosine kinase with immunoglobulin like and EGF like domains 1 [Source:HGNC Symbol;Acc:HGNC:11809]	protein_coding	25	82	22	17	52	25	123	68	20	82	26	34	52	27	34	117	9	47	15	28	223	160	185	40	14	40	41	46	328	134	102	7	21	55	316	19	5	50	20	201	14	5	60	63	83
ENSG00000214114	ENSG00000214114	MYCBP	MYC binding protein [Source:HGNC Symbol;Acc:HGNC:7554]	protein_coding	1341	1788	276	277	1337	1404	1574	956	754	2229	934	3234	1128	1478	491	761	307	1007	362	582	601	1423	1543	1235	210	1922	1606	2592	1240	1962	711	544	334	2551	240	550	703	1175	808	548	922	1603	860	1053	168
ENSG00000173436	ENSG00000173436	MICOS10	mitochondrial contact site and cristae organizing system subunit 10 [Source:HGNC Symbol;Acc:HGNC:32068]	protein_coding	444	784	204	230	844	595	693	445	208	782	368	1236	542	609	267	412	202	674	124	318	851	871	841	714	97	569	388	551	842	697	354	261	242	1518	796	1198	881	1967	814	2187	3121	2582	9240	2405	1083
ENSG00000116544	ENSG00000116544	DLGAP3	DLG associated protein 3 [Source:HGNC Symbol;Acc:HGNC:30368]	protein_coding	1	10	0	1	1	3	0	4	2	3	0	13	5	3	0	1	0	7	1	7	13	7	8	3	0	5	2	5	2	9	11	4	2	5	46	13	7	24	2	18	10	61	26	86	40
ENSG00000231900	ENSG00000231900	GOT2P1	GOT2 pseudogene 1 [Source:HGNC Symbol;Acc:HGNC:4434]	processed_pseudogene	0	10	0	0	0	0	0	0	0	0	0	0	0	0	11	0	0	15	0	16	0	48	10	0	0	2	0	0	0	0	0	0	0	0	0	2	0	0	0	1	0	0	68	0	2
ENSG00000236723	ENSG00000236723		novel transcript, antisense to CPT2	lncRNA	176	269	58	93	101	289	266	232	106	299	211	849	244	372	164	291	31	377	79	182	306	355	368	213	29	432	419	460	275	336	172	109	73	465	167	0	224	0	343	132	1867	456	24	10	5
ENSG00000117016	ENSG00000117016	RIMS3	regulating synaptic membrane exocytosis 3 [Source:HGNC Symbol;Acc:HGNC:21292]	protein_coding	5	83	16	24	111	16	1	25	0	47	0	48	5	6	9	65	0	78	11	9	13	52	9	88	16	20	2	14	2	83	3	16	12	30	5	12	12	4	17	2	4	13	40	30	43
ENSG00000121310	ENSG00000121310	ECHDC2	enoyl-CoA hydratase domain containing 2 [Source:HGNC Symbol;Acc:HGNC:23408]	protein_coding	141	126	79	53	342	81	150	27	70	303	68	191	297	241	185	159	76	174	49	64	652	198	259	73	52	210	182	254	785	216	196	22	73	58	555	14	306	270	603	130	7	206	1	80	417
ENSG00000169213	ENSG00000169213	RAB3B	RAB3B, member RAS oncogene family [Source:HGNC Symbol;Acc:HGNC:9778]	protein_coding	0	23	3	11	35	127	2	29	13	86	5	1	22	3	38	12	21	64	1	105	13	97	19	25	21	74	15	44	2	110	29	8	0	4	50	25	7	2	19	84	4	0	30	18	60
ENSG00000163866	ENSG00000163866	SMIM12	small integral membrane protein 12 [Source:HGNC Symbol;Acc:HGNC:25154]	protein_coding	803	1293	328	303	1160	993	830	571	475	1265	554	1878	515	767	273	879	292	916	238	468	1045	1449	831	543	100	887	558	890	1451	1055	379	512	352	2327	481	369	786	563	741	1534	4	2012	144	109	433
ENSG00000225779	ENSG00000225779		novel pseudogene	processed_pseudogene	0	8	1	0	1	0	3	2	6	5	0	0	10	4	7	0	0	2	0	3	0	2	3	4	6	1	1	8	12	0	14	1	0	2	2	2	1	2	9	0	0	0	0	0	8
ENSG00000284601	ENSG00000284601		novel transcript	lncRNA	2	18	3	7	16	14	6	6	3	102	5	0	3	2	11	4	10	27	3	11	14	11	14	13	10	5	11	18	10	13	6	16	0	7	33	4	37	0	20	6	8	0	51	59	19
ENSG00000237130	ENSG00000237130	MRPS6P2	mitochondrial ribosomal protein S6 pseudogene 2 [Source:HGNC Symbol;Acc:HGNC:29781]	processed_pseudogene	0	6	0	3	1	8	0	1	0	0	0	0	0	0	0	0	0	0	0	8	6	0	3	4	1	9	0	2	0	0	2	4	0	0	1	0	0	0	19	0	0	0	13	0	0
ENSG00000143001	ENSG00000143001	TMEM61	transmembrane protein 61 [Source:HGNC Symbol;Acc:HGNC:27296]	protein_coding	0	0	0	0	5	0	0	0	0	11	0	0	5	0	0	0	0	9	1	0	1	0	7	0	0	10	0	5	33	13	10	0	1	0	1	2	3	0	1	0	3	0	0	33	8
ENSG00000229716	ENSG00000229716	RPL23AP19	ribosomal protein L23a pseudogene 19 [Source:HGNC Symbol;Acc:HGNC:36708]	processed_pseudogene	0	6	1	0	0	26	2	2	2	5	0	0	0	0	3	0	0	6	0	7	4	14	1	0	0	6	2	12	0	29	0	2	0	13	0	1	1	0	0	0	0	0	0	0	0
ENSG00000226133	ENSG00000226133	LINC02794	long intergenic non-protein coding RNA 2794 [Source:HGNC Symbol;Acc:HGNC:54318]	lncRNA	0	3	0	1	14	7	1	5	1	3	0	0	0	0	1	0	0	0	0	9	4	25	6	0	2	10	0	6	6	3	0	0	2	1	35	5	2	2	0	1	0	0	10	14	14
ENSG00000232335	ENSG00000232335		novel transcript	lncRNA	1	20	5	24	8	15	0	3	4	28	7	33	24	25	26	12	2	9	0	21	13	36	0	22	19	28	24	50	0	53	17	20	2	0	7	1	0	27	55	44	0	0	16	4	4
ENSG00000260971	ENSG00000260971		novel transcript	lncRNA	2	35	1	21	24	35	9	9	20	36	0	1	2	4	66	36	21	26	7	70	10	83	38	54	40	36	23	44	25	21	9	10	12	13	37	19	15	6	33	0	5	0	92	42	34
ENSG00000284696	ENSG00000284696	LINC02808	long intergenic non-protein coding RNA 2808 [Source:HGNC Symbol;Acc:HGNC:54340]	lncRNA	0	4	0	6	4	5	1	14	2	33	0	2	0	1	2	11	0	8	0	22	3	20	0	2	3	1	0	3	1	42	1	0	0	18	111	11	0	2	20	1	1	7	0	18	16
ENSG00000238242	ENSG00000238242	LINC02778	long intergenic non-protein coding RNA 2778 [Source:HGNC Symbol;Acc:HGNC:54298]	lncRNA	0	6	0	0	2	7	4	0	8	1	0	4	0	8	1	0	0	2	14	8	0	0	3	1	5	9	1	9	3	0	3	0	0	0	6	3	0	0	0	42	2	0	0	9	12
ENSG00000285839	ENSG00000285839		novel transcript	protein_coding	663	593	244	154	1007	308	1110	291	284	655	384	1496	767	754	345	243	219	387	252	234	939	489	781	477	41	558	414	437	1240	814	516	234	329	1144	265	818	588	546	517	853	2633	336	0	1553	559
ENSG00000232762	ENSG00000232762		novel transcript	lncRNA	0	10	0	6	0	3	0	2	0	0	0	0	0	0	7	0	0	8	0	6	1	2	0	4	0	0	0	12	8	5	2	1	0	7	83	2	2	0	1	21	3	3	22	0	32
ENSG00000117419	ENSG00000117419	ERI3	ERI1 exoribonuclease family member 3 [Source:HGNC Symbol;Acc:HGNC:17276]	protein_coding	240	591	144	169	460	346	506	201	121	327	198	1071	410	322	158	293	109	491	100	218	769	427	625	409	46	404	270	338	879	621	255	150	232	885	515	1042	473	536	383	655	1508	731	2070	83	602
ENSG00000162384	ENSG00000162384	CZIB	CXXC motif containing zinc binding protein [Source:HGNC Symbol;Acc:HGNC:26059]	protein_coding	493	518	174	174	1325	455	786	324	209	640	620	1050	686	488	306	296	219	502	194	244	1191	662	970	362	61	509	481	515	1399	768	362	177	323	1064	648	335	747	1065	930	1055	1428	642	6	23	848
ENSG00000162391	ENSG00000162391	FAM151A	family with sequence similarity 151 member A [Source:HGNC Symbol;Acc:HGNC:25032]	protein_coding	0	36	0	6	23	6	0	22	8	9	0	31	0	51	0	4	0	22	0	16	4	28	23	19	0	5	31	45	0	1	6	0	10	89	3	13	2	3	65	2	2	1	76	18	17
ENSG00000174348	ENSG00000174348	PODN	podocan [Source:HGNC Symbol;Acc:HGNC:23174]	protein_coding	318	3	283	1	1792	1	842	24	161	45	242	2	2173	2	800	3	263	60	160	7	3328	15	1499	10	175	19	292	14	3979	5	1351	2	662	0	1411	14	690	0	2903	1	101	12	45	58	451
ENSG00000154198	ENSG00000154198	CYP4Z2P	cytochrome P450 family 4 subfamily Z member 2, pseudogene [Source:HGNC Symbol;Acc:HGNC:24426]	transcribed_unprocessed_pseudogene	0	10	0	8	0	0	0	9	2	0	0	1	0	0	4	0	4	16	0	18	0	47	2	3	5	10	0	22	38	16	3	5	0	0	0	1	0	2	11	0	3	0	33	4	14
ENSG00000117859	ENSG00000117859	OSBPL9	oxysterol binding protein like 9 [Source:HGNC Symbol;Acc:HGNC:16386]	protein_coding	2302	3473	1021	704	3711	2849	4170	1695	1408	3558	1330	5393	3305	2679	1419	2647	807	3256	924	1368	2935	3466	4021	2816	472	5195	2190	3086	7136	6491	1917	2130	1209	5933	3786	4758	2766	1320	2435	2479	3799	1843	7307	93	877
ENSG00000228121	ENSG00000228121	PHB1P3	PHB1 pseudogene 3 [Source:HGNC Symbol;Acc:HGNC:8915]	processed_pseudogene	0	0	0	1	0	1	0	0	0	0	0	0	0	0	0	0	0	1	0	8	0	1	2	0	0	0	4	2	1	0	0	1	0	2	0	0	0	0	0	0	0	0	0	11	8
ENSG00000162396	ENSG00000162396	PARS2	prolyl-tRNA synthetase 2, mitochondrial [Source:HGNC Symbol;Acc:HGNC:30563]	protein_coding	13	91	6	4	0	8	13	12	13	91	51	102	47	28	16	35	0	103	5	9	54	21	60	60	17	18	11	45	70	81	13	29	5	59	5	7	19	1	3	179	1	1	8	31	6
ENSG00000203995	ENSG00000203995	ZYG11A	zyg-11 family member A, cell cycle regulator [Source:HGNC Symbol;Acc:HGNC:32058]	protein_coding	2	17	3	28	23	30	1	3	5	121	0	3	5	4	22	0	2	39	4	19	9	43	7	4	11	37	5	37	10	45	10	2	1	8	30	7	28	1	43	0	2	0	24	6	17
ENSG00000227742	ENSG00000227742	CALR4P	calreticulin 4, pseudogene [Source:HGNC Symbol;Acc:HGNC:35456]	transcribed_unitary_pseudogene	0	10	0	1	0	4	0	1	1	13	0	0	2	2	2	1	0	24	6	32	14	19	11	12	4	14	8	25	8	8	1	1	1	0	46	5	18	0	13	26	0	0	93	10	16
ENSG00000284686	ENSG00000284686		novel transcript	protein_coding	214	258	167	52	579	91	351	110	169	217	305	70	555	262	456	124	145	63	109	49	1458	214	1130	124	69	71	303	48	957	124	321	33	180	300	442	231	348	3	504	183	463	0	0	31	103
ENSG00000162378	ENSG00000162378	ZYG11B	zyg-11 family member B, cell cycle regulator [Source:HGNC Symbol;Acc:HGNC:25820]	protein_coding	279	416	150	175	386	636	481	233	262	196	144	717	424	208	130	403	189	800	179	269	597	428	565	252	41	291	435	445	850	803	366	143	166	430	50	4	278	31	327	152	2	1	14	33	69
ENSG00000233079	ENSG00000233079	LINC01755	long intergenic non-protein coding RNA 1755 [Source:HGNC Symbol;Acc:HGNC:52543]	lncRNA	0	10	0	0	32	1	0	14	4	69	0	0	0	0	5	2	6	11	0	18	8	7	22	6	2	0	8	8	26	0	5	0	1	16	0	6	20	0	1	1	12	0	26	13	7
ENSG00000259818	ENSG00000259818	CZIB-DT	CZIB divergent transcript [Source:HGNC Symbol;Acc:HGNC:55408]	lncRNA	0	1	0	6	1	1	0	2	0	0	0	0	0	0	3	0	1	3	0	4	6	1	1	20	0	0	0	2	12	0	0	0	0	0	16	4	1	2	4	1	1	0	7	22	18
ENSG00000229444	ENSG00000229444	ST3GAL3-AS1	ST3GAL3 antisense RNA 1 [Source:HGNC Symbol;Acc:HGNC:40529]	lncRNA	0	7	1	3	7	6	4	1	9	8	0	5	0	3	31	2	2	16	2	27	0	31	8	8	7	12	5	12	5	26	10	1	1	12	29	0	2	0	26	0	0	0	0	0	2
ENSG00000240563	ENSG00000240563	L1TD1	LINE1 type transposase domain containing 1 [Source:HGNC Symbol;Acc:HGNC:25595]	protein_coding	0	36	0	48	62	2	4	10	24	88	0	29	2	1	1	0	5	33	8	13	4	47	1	1	8	29	15	6	0	15	0	2	2	2	27	2	0	0	12	2	0	0	6	0	14
ENSG00000284773	ENSG00000284773		novel protein	protein_coding	40	29	18	21	170	29	183	24	35	66	80	189	95	102	38	22	25	43	25	9	130	69	85	54	14	28	93	59	236	30	40	23	44	87	20	31	101	48	47	208	96	0	13	51	129
ENSG00000117862	ENSG00000117862	TXNDC12	thioredoxin domain containing 12 [Source:HGNC Symbol;Acc:HGNC:24626]	protein_coding	628	486	236	140	1019	269	1027	247	281	625	350	1422	724	702	318	261	222	316	240	184	920	465	769	419	51	493	342	388	1174	753	502	212	317	1061	213	857	584	548	530	842	2744	367	2	1621	607
ENSG00000228369	ENSG00000228369	TXNDC12-AS1	TXNDC12 antisense RNA 1 [Source:HGNC Symbol;Acc:HGNC:30008]	lncRNA	0	0	0	14	49	24	0	5	3	42	0	0	0	0	27	14	4	14	0	9	6	28	5	0	0	15	7	10	0	8	0	0	0	0	0	0	0	0	0	1	0	0	0	0	2
ENSG00000183431	ENSG00000183431	SF3A3	splicing factor 3a subunit 3 [Source:HGNC Symbol;Acc:HGNC:10767]	protein_coding	560	2024	283	655	1541	1785	885	951	498	1810	1090	3866	1326	2023	674	1421	384	2178	296	794	1515	1952	1586	1239	276	2078	1182	1797	2226	3054	654	787	584	2457	719	3152	964	1916	962	1567	3654	4782	210	3368	371
ENSG00000224609	ENSG00000224609	FGGY-DT	FGGY divergent transcript [Source:HGNC Symbol;Acc:HGNC:55265]	lncRNA	21	20	7	5	22	21	30	13	24	43	0	3	35	0	16	1	6	53	1	23	13	33	29	17	7	21	9	18	84	21	14	17	18	9	47	5	71	4	23	23	7	0	88	101	21
ENSG00000235545	ENSG00000235545	DOCK7-DT	DOCK7 divergent transcript [Source:HGNC Symbol;Acc:HGNC:55670]	lncRNA	1	23	2	19	30	2	4	12	1	25	0	2	13	10	16	0	15	3	0	18	0	8	3	3	3	2	5	18	3	81	8	0	0	0	2	1	7	1	12	17	0	0	0	7	6
ENSG00000169174	ENSG00000169174	PCSK9	proprotein convertase subtilisin/kexin type 9 [Source:HGNC Symbol;Acc:HGNC:20001]	protein_coding	20	5	0	0	2	3	4	6	3	11	0	0	0	0	5	1	0	15	2	0	2	18	16	15	0	1	7	11	21	20	13	2	0	0	17	21	131	3	3	11	12	1	139	112	70
ENSG00000238063	ENSG00000238063	LINC01685	long intergenic non-protein coding RNA 1685 [Source:HGNC Symbol;Acc:HGNC:52473]	lncRNA	0	9	4	6	10	25	1	4	7	6	0	1	2	2	7	1	0	5	0	11	2	54	3	0	6	14	1	9	2	5	4	3	0	8	0	5	7	2	4	17	0	0	58	25	26
ENSG00000243725	ENSG00000243725	TTC4	tetratricopeptide repeat domain 4 [Source:HGNC Symbol;Acc:HGNC:12394]	protein_coding	115	413	42	155	283	306	407	254	81	504	260	552	278	245	284	192	89	331	138	271	516	428	279	368	40	234	215	326	752	619	129	252	140	674	397	293	240	406	291	602	903	2255	14	26	124
ENSG00000171872	ENSG00000171872	KLF17	Kruppel like factor 17 [Source:HGNC Symbol;Acc:HGNC:18830]	protein_coding	1	40	8	16	29	1	0	4	4	27	0	4	1	3	22	0	4	32	0	16	2	56	13	3	2	11	6	34	2	1	4	1	3	0	0	5	0	3	3	1	0	0	48	25	11
ENSG00000162407	ENSG00000162407	PLPP3	phospholipid phosphatase 3 [Source:HGNC Symbol;Acc:HGNC:9229]	protein_coding	424	479	282	67	1203	142	725	239	337	465	554	164	1073	479	978	281	296	129	235	113	3224	376	2170	221	125	155	497	94	1567	178	768	89	282	574	910	340	893	5	1023	446	1144	4	47	54	248
ENSG00000285079	ENSG00000285079		novel transcript	lncRNA	0	6	0	2	0	0	0	0	0	27	0	0	0	1	10	0	0	4	0	12	0	30	5	1	3	14	0	2	0	59	7	2	0	8	0	0	0	0	1	1	0	0	0	5	2
ENSG00000169218	ENSG00000169218	RSPO1	R-spondin 1 [Source:HGNC Symbol;Acc:HGNC:21679]	protein_coding	28	1	6	0	10	28	71	24	45	9	67	10	28	2	29	13	20	71	24	24	250	32	79	15	7	8	15	24	136	178	35	7	16	41	231	13	4	4	88	72	0	0	120	88	50
ENSG00000163877	ENSG00000163877	SNIP1	Smad nuclear interacting protein 1 [Source:HGNC Symbol;Acc:HGNC:30587]	protein_coding	94	119	26	89	145	129	212	56	44	159	92	154	95	132	50	72	65	148	60	117	247	132	234	89	23	142	83	101	206	87	122	66	20	361	68	53	186	1	143	72	0	5	0	13	121
ENSG00000228929	ENSG00000228929	RPS13P2	ribosomal protein S13 pseudogene 2 [Source:HGNC Symbol;Acc:HGNC:36364]	processed_pseudogene	24	41	10	18	71	23	43	25	11	31	29	80	20	37	13	28	13	62	11	30	39	64	35	26	7	37	26	32	51	39	15	17	12	94	4	9	8	14	18	1	14	10	38	5	11
ENSG00000157184	ENSG00000157184	CPT2	carnitine palmitoyltransferase 2 [Source:HGNC Symbol;Acc:HGNC:2330]	protein_coding	271	387	78	142	295	419	378	297	151	464	320	1173	393	492	224	391	75	534	117	272	500	560	544	303	48	561	597	626	493	483	232	152	127	653	265	54	349	80	495	202	2683	631	74	44	70
ENSG00000272491	ENSG00000272491		novel transcript, antisense to SLC5A9	lncRNA	17	0	0	0	0	8	0	8	1	1	0	0	0	2	16	0	7	20	3	5	0	1	0	1	1	0	0	16	1	0	0	2	2	0	0	2	3	2	1	1	2	0	2	23	10
ENSG00000198815	ENSG00000198815	FOXJ3	forkhead box J3 [Source:HGNC Symbol;Acc:HGNC:29178]	protein_coding	301	808	87	246	574	565	602	320	373	774	443	1844	346	562	159	516	147	802	178	318	492	842	877	644	132	627	529	477	836	649	416	218	159	528	372	1322	119	350	502	595	0	2	146	25	20
ENSG00000134744	ENSG00000134744	TUT4	terminal uridylyl transferase 4 [Source:HGNC Symbol;Acc:HGNC:28981]	protein_coding	94	156	54	113	267	210	154	116	104	377	209	576	234	177	299	429	27	347	71	288	87	276	195	215	68	308	94	192	418	261	104	98	81	656	12	11	165	76	247	41	465	2	421	134	42
ENSG00000287703	ENSG00000287703		novel transcript	lncRNA	0	0	0	1	0	0	0	0	0	0	0	0	0	1	0	1	0	0	0	9	0	0	0	0	1	11	0	0	0	0	0	0	0	0	0	2	2	0	3	0	2	0	2	26	6
ENSG00000283039	ENSG00000283039	KLF18	Kruppel like factor 18 [Source:HGNC Symbol;Acc:HGNC:51793]	protein_coding	0	9	0	16	0	27	0	0	1	23	0	7	0	0	15	4	1	16	0	7	10	67	0	2	0	0	8	6	45	44	0	0	4	1	9	3	0	0	3	14	2	0	0	10	12
ENSG00000229294	ENSG00000229294		novel transcript	lncRNA	0	3	0	4	5	21	1	0	2	14	0	12	0	2	13	0	0	7	0	4	8	0	12	0	4	0	5	4	0	11	0	1	0	4	0	0	0	0	6	0	2	0	0	2	26
ENSG00000232993	ENSG00000232993		novel transcript	lncRNA	69	0	59	0	374	0	179	8	31	3	49	0	498	2	146	1	51	12	30	0	677	0	281	0	47	1	73	0	858	0	269	0	134	0	309	1	161	0	636	1	19	0	0	14	104
ENSG00000235446	ENSG00000235446	LINC02791	long intergenic non-protein coding RNA 2791 [Source:HGNC Symbol;Acc:HGNC:54315]	lncRNA	0	0	0	12	4	0	0	0	0	0	0	0	0	0	0	0	0	5	0	5	0	6	3	0	1	2	0	3	5	7	0	0	1	0	11	0	0	1	0	0	0	0	0	0	5
ENSG00000162385	ENSG00000162385	MAGOH	mago homolog, exon junction complex subunit [Source:HGNC Symbol;Acc:HGNC:6815]	protein_coding	137	199	39	60	124	101	211	91	53	199	50	369	122	137	64	100	42	208	47	72	104	187	212	128	11	160	80	173	216	266	99	108	46	326	176	566	304	620	226	427	0	658	5	3	43
ENSG00000234264	ENSG00000234264	DEPDC1-AS1	DEPDC1 antisense RNA 1 [Source:HGNC Symbol;Acc:HGNC:50592]	lncRNA	0	8	0	1	0	7	0	8	4	4	0	0	1	0	6	2	0	14	3	11	0	8	0	1	3	1	2	32	0	9	2	2	2	0	17	0	22	0	4	12	0	2	38	0	0
ENSG00000223883	ENSG00000223883	LINC01707	long intergenic non-protein coding RNA 1707 [Source:HGNC Symbol;Acc:HGNC:52495]	lncRNA	3	10	2	8	1	27	0	14	5	43	0	0	1	1	20	12	8	20	1	35	3	18	8	0	7	5	6	5	8	1	6	6	1	15	7	17	1	0	42	0	2	3	3	52	18
ENSG00000284808	ENSG00000284808		novel transcript	lncRNA	0	5	0	2	8	64	0	0	0	16	0	0	0	0	1	0	0	7	0	20	4	14	0	1	0	2	1	0	6	3	0	0	0	0	0	4	0	0	3	0	0	0	3	1	5
ENSG00000275350	ENSG00000275350		tubulin, beta 3 class III (TUBB3) pseudogene	processed_pseudogene	0	4	0	13	18	1	0	2	1	0	0	1	0	1	5	0	1	1	1	8	10	2	0	0	3	1	5	1	1	9	3	4	2	2	0	2	11	2	7	0	0	1	0	0	0
ENSG00000116652	ENSG00000116652	DLEU2L	deleted in lymphocytic leukemia 2 like [Source:HGNC Symbol;Acc:HGNC:13225]	lncRNA	0	0	0	8	0	0	0	0	1	0	0	0	0	0	1	0	0	1	0	18	10	0	0	2	0	0	0	1	0	0	7	0	0	0	3	5	0	1	0	0	0	0	13	32	4
ENSG00000123080	ENSG00000123080	CDKN2C	cyclin dependent kinase inhibitor 2C [Source:HGNC Symbol;Acc:HGNC:1789]	protein_coding	154	281	19	62	224	242	271	168	143	490	161	416	225	365	79	100	34	474	94	146	329	318	522	452	77	499	338	468	281	558	181	122	72	441	100	1147	82	526	155	334	297	677	15	1072	333
ENSG00000077549	ENSG00000077549	CAPZB	capping actin protein of muscle Z-line subunit beta [Source:HGNC Symbol;Acc:HGNC:1491]	protein_coding	2691	4103	669	968	3642	3618	3627	1930	1484	5381	2210	6280	2517	3261	984	2930	908	3749	814	1746	2298	4676	3472	2756	402	4928	2395	3574	4203	5846	1468	1598	971	7203	1884	3597	4009	4704	2429	5983	3069	10264	8615	2263	1526
ENSG00000162598	ENSG00000162598	C1orf87	chromosome 1 open reading frame 87 [Source:HGNC Symbol;Acc:HGNC:28547]	protein_coding	0	16	2	9	16	28	1	10	15	13	0	0	0	1	13	1	2	14	13	70	9	10	44	7	4	3	9	14	65	23	17	7	2	4	46	45	5	7	6	0	1	0	19	55	36
ENSG00000280317	ENSG00000280317		TEC	TEC	0	17	1	8	3	10	1	1	3	7	0	3	0	1	7	0	0	8	0	11	1	16	1	7	5	7	4	1	2	9	2	9	1	3	37	4	1	1	6	0	0	0	0	0	6
ENSG00000162415	ENSG00000162415	ZSWIM5	zinc finger SWIM-type containing 5 [Source:HGNC Symbol;Acc:HGNC:29299]	protein_coding	2	28	12	11	34	18	28	32	34	115	132	8	32	1	19	3	20	43	23	36	7	44	24	17	3	38	7	36	27	5	14	14	0	91	24	12	28	1	30	10	1	4	33	133	36
ENSG00000162600	ENSG00000162600	OMA1	OMA1 zinc metallopeptidase [Source:HGNC Symbol;Acc:HGNC:29661]	protein_coding	170	189	79	44	599	204	465	208	135	433	160	587	205	294	126	44	125	321	124	209	393	155	452	252	53	199	273	506	383	397	226	174	61	329	126	2	105	947	350	100	6	2	4949	27	17
ENSG00000116704	ENSG00000116704	SLC35D1	solute carrier family 35 member D1 [Source:HGNC Symbol;Acc:HGNC:20800]	protein_coding	62	57	63	10	18	18	111	66	115	94	168	146	78	203	133	15	100	171	21	56	349	175	3	61	64	38	59	39	348	340	74	48	16	257	284	11	448	4	143	0	1	2	10	50	22
ENSG00000227644	ENSG00000227644	HIGD1AP11	HIG1 hypoxia inducible domain family member 1A pseudogene 11 [Source:HGNC Symbol;Acc:HGNC:43006]	processed_pseudogene	5	0	0	0	26	0	24	0	0	0	16	0	102	0	30	0	10	6	10	0	117	0	19	0	6	0	11	0	141	0	2	0	9	0	0	0	26	0	65	0	0	0	0	1	28
ENSG00000157193	ENSG00000157193	LRP8	LDL receptor related protein 8 [Source:HGNC Symbol;Acc:HGNC:6700]	protein_coding	20	47	15	54	52	145	52	111	34	232	0	145	51	126	48	15	22	224	2	97	115	143	39	65	11	59	54	134	260	157	110	28	23	71	52	36	18	13	27	97	19	41	77	232	111
ENSG00000116205	ENSG00000116205	TCEANC2	transcription elongation factor A N-terminal and central domain containing 2 [Source:HGNC Symbol;Acc:HGNC:26494]	protein_coding	138	345	72	109	441	222	158	175	152	384	221	810	201	235	206	334	206	281	52	234	333	498	309	330	79	278	243	442	482	409	248	140	97	227	50	431	197	13	315	475	11	71	170	103	83
ENSG00000198841	ENSG00000198841	KTI12	KTI12 chromatin associated homolog [Source:HGNC Symbol;Acc:HGNC:25160]	protein_coding	94	247	26	55	34	125	182	115	33	155	88	253	164	161	77	48	10	169	47	101	40	110	168	135	2	178	137	151	212	287	47	64	36	265	268	3	43	125	24	236	0	0	0	28	13
ENSG00000116212	ENSG00000116212	LRRC42	leucine rich repeat containing 42 [Source:HGNC Symbol;Acc:HGNC:28792]	protein_coding	268	285	80	83	330	182	264	142	128	200	181	470	185	276	121	81	101	249	96	161	326	218	310	362	28	246	230	283	387	628	166	120	93	283	114	278	238	1	359	0	1082	445	3	13	245
ENSG00000234204	ENSG00000234204	PIGPP2	phosphatidylinositol glycan anchor biosynthesis class P pseudogene 2 [Source:HGNC Symbol;Acc:HGNC:45154]	processed_pseudogene	2	6	0	12	0	0	0	1	3	4	0	0	0	0	1	0	0	0	0	8	0	5	2	0	8	4	9	1	1	8	4	0	1	0	19	3	0	0	15	0	0	0	0	11	1
ENSG00000233994	ENSG00000233994	GDI2P2	GDP dissociation inhibitor 2 pseudogene 2 [Source:HGNC Symbol;Acc:HGNC:37976]	processed_pseudogene	0	12	1	0	0	0	0	8	0	4	0	7	1	0	7	1	2	4	0	28	0	7	1	0	2	7	3	1	0	13	0	0	1	0	1	0	0	0	0	1	1	1	1	35	0
ENSG00000213561	ENSG00000213561		Nit protein 2 (NIT2) pseudogene	processed_pseudogene	0	0	0	0	1	0	0	0	0	2	0	0	0	0	0	0	5	20	0	1	0	0	20	0	0	9	0	9	0	14	0	0	0	2	0	0	0	0	0	3	0	0	0	10	3
ENSG00000132854	ENSG00000132854	KANK4	KN motif and ankyrin repeat domains 4 [Source:HGNC Symbol;Acc:HGNC:27263]	protein_coding	5	9	3	25	178	39	21	11	17	55	0	0	1	4	93	8	6	35	5	27	18	107	34	19	25	29	33	37	143	43	29	19	0	3	67	28	37	4	57	5	4	4	117	60	52
ENSG00000162616	ENSG00000162616	DNAJB4	DnaJ heat shock protein family (Hsp40) member B4 [Source:HGNC Symbol;Acc:HGNC:14886]	protein_coding	308	666	175	135	763	267	924	254	289	387	446	279	485	534	377	298	118	343	152	235	1429	341	1012	385	114	467	183	190	1073	300	359	96	140	565	713	4	401	15	858	163	9	921	23	3	143
ENSG00000162607	ENSG00000162607	USP1	ubiquitin specific peptidase 1 [Source:HGNC Symbol;Acc:HGNC:12607]	protein_coding	431	1009	94	258	1061	594	720	384	380	1659	511	1391	491	966	257	789	112	1121	190	566	1160	431	890	875	110	1128	866	1392	785	1545	422	446	155	1242	644	20	160	397	410	276	2187	204	40	37	21
ENSG00000233271	ENSG00000233271		novel transcript	lncRNA	0	0	0	0	5	0	0	0	0	10	0	0	5	0	0	0	0	7	1	0	0	0	7	0	0	10	0	3	30	9	7	0	1	0	0	0	3	0	0	0	3	0	0	27	5
ENSG00000233333	ENSG00000233333	RNFT1P2	ring finger protein, transmembrane 1 pseudogene 2 [Source:HGNC Symbol;Acc:HGNC:44388]	processed_pseudogene	0	11	0	5	0	6	1	4	0	2	0	5	0	0	15	0	0	3	0	28	0	0	3	18	0	17	3	0	0	0	1	1	1	0	109	0	0	0	16	0	0	0	0	0	0
ENSG00000154027	ENSG00000154027	AK5	adenylate kinase 5 [Source:HGNC Symbol;Acc:HGNC:365]	protein_coding	2	37	21	24	3	47	223	16	10	18	0	53	39	67	47	0	25	31	55	48	126	15	71	5	20	35	36	23	48	39	63	22	31	5	155	3	11	1	24	10	1	1	84	29	25
ENSG00000234108	ENSG00000234108		cytochrome c oxidase subunit V1a polypeptide 1 (COX6A1) pseudogene	processed_pseudogene	0	5	0	3	4	2	3	0	1	10	1	0	0	6	4	0	1	2	0	5	0	2	0	1	5	6	3	9	0	0	0	0	0	0	1	4	0	1	3	0	0	0	8	0	5
ENSG00000132122	ENSG00000132122	SPATA6	spermatogenesis associated 6 [Source:HGNC Symbol;Acc:HGNC:18309]	protein_coding	225	340	62	41	569	118	95	72	139	233	161	289	226	49	67	179	137	254	69	152	535	159	446	60	23	18	101	94	735	12	119	63	144	163	130	0	52	2	225	22	2	1	19	12	110
ENSG00000137960	ENSG00000137960	GIPC2	GIPC PDZ domain containing family member 2 [Source:HGNC Symbol;Acc:HGNC:18177]	protein_coding	210	291	171	100	431	365	355	174	196	182	542	407	210	146	195	39	77	231	162	115	529	185	1172	296	39	419	133	84	686	62	352	187	227	1102	145	380	198	25	123	163	1066	0	5	73	10
ENSG00000237852	ENSG00000237852		novel transcript	lncRNA	5	3	0	1	1	0	7	0	3	0	4	9	2	0	1	0	1	0	1	0	0	18	1	0	1	7	1	0	19	0	0	0	0	4	1	73	3	3	0	0	0	0	0	0	1
ENSG00000116745	ENSG00000116745	RPE65	retinoid isomerohydrolase RPE65 [Source:HGNC Symbol;Acc:HGNC:10294]	protein_coding	0	18	0	23	0	15	1	2	7	28	0	0	0	0	2	1	1	60	0	43	7	49	14	0	7	2	10	17	0	22	11	0	0	2	17	4	5	2	1	8	0	0	0	0	11
ENSG00000132855	ENSG00000132855	ANGPTL3	angiopoietin like 3 [Source:HGNC Symbol;Acc:HGNC:491]	protein_coding	0	0	1	0	0	14	108	0	0	1	101	152	22	474	3	0	3	0	3	3	169	0	3	0	11	166	2	7	2	14	2	11	0	0	0	0	0	1	0	0	0	1	0	1	2
ENSG00000285407	ENSG00000285407		novel transcript	lncRNA	0	42	0	21	7	13	0	14	9	6	0	0	0	0	9	0	2	22	0	40	1	68	4	20	9	1	0	43	7	9	1	0	0	1	5	3	15	5	10	0	2	0	0	12	13
ENSG00000229636	ENSG00000229636	KRT8P21	keratin 8 pseudogene 21 [Source:HGNC Symbol;Acc:HGNC:33373]	processed_pseudogene	0	3	0	5	3	2	1	0	0	33	0	0	0	3	44	1	3	3	0	0	0	24	2	0	0	0	3	3	0	0	5	1	2	0	4	2	0	27	2	0	0	0	0	22	9
ENSG00000116675	ENSG00000116675	DNAJC6	DnaJ heat shock protein family (Hsp40) member C6 [Source:HGNC Symbol;Acc:HGNC:15469]	protein_coding	11	404	5	98	86	174	80	180	48	95	13	50	136	48	205	182	37	652	54	480	33	209	620	623	36	422	37	167	385	743	17	37	7	176	5	578	105	404	157	134	1	16	94	36	43
ENSG00000162433	ENSG00000162433	AK4	adenylate kinase 4 [Source:HGNC Symbol;Acc:HGNC:363]	protein_coding	116	297	45	58	435	206	451	164	67	283	347	370	286	298	335	116	131	145	48	120	421	307	320	155	12	133	106	164	528	161	262	93	49	221	123	347	288	287	123	129	10	4	4	32	175
ENSG00000213625	ENSG00000213625	LEPROT	leptin receptor overlapping transcript [Source:HGNC Symbol;Acc:HGNC:29477]	protein_coding	719	788	391	335	2362	892	1087	602	533	1217	805	1210	1541	935	951	1909	459	931	525	438	2071	659	2389	1521	396	1831	702	834	2899	1902	795	320	444	829	846	444	1054	139	2570	496	977	774	0	10	81
ENSG00000158966	ENSG00000158966	CACHD1	cache domain containing 1 [Source:HGNC Symbol;Acc:HGNC:29314]	protein_coding	52	33	25	40	136	43	124	30	22	42	82	10	108	41	121	4	21	43	10	80	222	164	72	37	47	9	121	29	288	56	131	22	14	73	719	18	48	2	416	19	6	0	71	59	47
ENSG00000203965	ENSG00000203965	EFCAB7	EF-hand calcium binding domain 7 [Source:HGNC Symbol;Acc:HGNC:29379]	protein_coding	76	98	19	52	157	21	115	30	58	76	34	58	160	20	49	0	42	66	15	71	36	59	46	24	18	29	77	56	177	61	37	59	30	120	2	2	22	0	173	17	188	0	0	2	7
ENSG00000153898	ENSG00000153898	MCOLN2	mucolipin TRP cation channel 2 [Source:HGNC Symbol;Acc:HGNC:13357]	protein_coding	0	6	3	25	21	77	4	28	6	81	49	133	4	25	56	81	16	105	2	109	38	150	40	4	24	24	42	43	68	119	65	23	7	80	76	3	3	453	45	113	0	0	21	11	16
ENSG00000117069	ENSG00000117069	ST6GALNAC5	ST6 N-acetylgalactosaminide alpha-2,6-sialyltransferase 5 [Source:HGNC Symbol;Acc:HGNC:19342]	protein_coding	0	1	0	0	2	5	6	0	0	7	1	0	0	0	0	0	1	0	0	6	18	0	1	2	2	0	4	1	0	0	6	4	0	8	7	4	7	0	1	0	0	0	65	24	14
ENSG00000125703	ENSG00000125703	ATG4C	autophagy related 4C cysteine peptidase [Source:HGNC Symbol;Acc:HGNC:16040]	protein_coding	188	342	104	118	231	337	261	219	137	487	308	499	256	341	194	336	51	564	104	210	491	355	403	473	32	425	176	179	215	149	209	152	61	337	179	753	296	190	244	343	1	0	24	0	172
ENSG00000285041	ENSG00000285041		novel transcript	lncRNA	1	10	0	5	0	10	2	8	2	10	0	0	0	1	2	0	2	6	0	20	2	65	3	0	5	4	2	5	1	0	0	3	0	0	0	1	17	31	2	23	0	0	0	9	5
ENSG00000285808	ENSG00000285808	LINC02797	long intergenic non-protein coding RNA 2797 [Source:HGNC Symbol;Acc:HGNC:54320]	lncRNA	0	8	1	6	0	0	1	1	0	7	0	1	1	0	4	1	0	0	0	2	2	6	1	0	0	0	0	7	0	5	5	0	0	0	1	0	4	2	21	0	0	0	0	11	5
ENSG00000154007	ENSG00000154007	ASB17	ankyrin repeat and SOCS box containing 17 [Source:HGNC Symbol;Acc:HGNC:19769]	protein_coding	0	0	0	0	0	1	0	6	0	3	0	0	0	0	0	0	10	0	0	18	0	0	0	7	1	0	0	1	0	0	0	0	0	0	0	5	0	0	1	0	0	0	4	0	0
ENSG00000230498	ENSG00000230498		novel transcript	lncRNA	1	11	0	1	0	0	2	6	0	13	0	0	0	0	8	0	1	1	0	16	0	30	0	0	1	7	1	10	1	9	0	1	0	6	3	101	1	0	3	0	0	0	37	0	3
ENSG00000162618	ENSG00000162618	ADGRL4	adhesion G protein-coupled receptor L4 [Source:HGNC Symbol;Acc:HGNC:20822]	protein_coding	761	1456	338	218	1414	403	1701	661	432	1337	452	733	533	735	760	708	232	593	302	251	1697	855	1180	356	113	530	228	117	820	284	450	192	521	1006	155	10	640	1085	455	330	1311	313	12	58	8
ENSG00000131233	ENSG00000131233	GJA9	gap junction protein alpha 9 [Source:HGNC Symbol;Acc:HGNC:19155]	protein_coding	9	9	0	0	23	3	9	4	6	12	0	3	8	2	13	6	0	0	1	8	11	12	7	8	3	0	12	5	22	6	2	5	3	25	0	7	8	0	1	0	0	0	0	15	1
ENSG00000287647	ENSG00000287647		novel transcript, antisense to AK5	lncRNA	0	3	2	6	18	0	63	0	0	25	0	4	0	2	4	0	1	1	12	9	34	13	29	0	3	0	5	0	0	2	3	0	0	0	0	0	19	0	3	0	0	0	0	35	3
ENSG00000230863	ENSG00000230863		histidine acid phosphatase domain containing 1 (HISPPD1) pseudogene	transcribed_processed_pseudogene	0	4	1	4	8	5	1	1	1	9	0	0	2	1	9	0	3	1	1	6	9	8	1	3	3	3	5	19	5	9	7	2	1	5	3	1	0	0	22	0	0	0	104	17	10
ENSG00000287224	ENSG00000287224		novel transcript	lncRNA	0	1	0	0	0	0	0	7	0	0	0	0	0	0	0	0	0	0	0	0	0	0	0	0	4	1	0	0	0	0	29	0	9	0	0	4	0	0	0	1	3	0	3	0	7
ENSG00000225087	ENSG00000225087		novel transcript	lncRNA	0	6	2	4	0	2	1	3	1	0	0	2	0	0	9	0	2	5	1	8	0	18	1	1	4	3	6	5	0	7	6	4	0	0	75	0	17	2	4	1	0	0	0	64	11
ENSG00000224986	ENSG00000224986	PPP1R8P1	protein phosphatase 1 regulatory subunit 8 pseudogene 1 [Source:HGNC Symbol;Acc:HGNC:9297]	processed_pseudogene	0	4	0	14	2	0	2	5	5	0	0	1	4	0	8	0	0	11	1	28	0	53	12	15	12	0	3	3	2	30	2	4	0	10	0	32	11	0	50	1	3	0	0	3	7
ENSG00000280378	ENSG00000280378		TEC	TEC	7	44	8	27	31	35	5	6	10	28	0	19	27	2	24	0	9	49	2	22	13	78	8	34	26	22	15	13	22	19	13	7	0	1	38	1	1	3	22	0	0	0	49	5	50
ENSG00000188786	ENSG00000188786	MTF1	metal regulatory transcription factor 1 [Source:HGNC Symbol;Acc:HGNC:7428]	protein_coding	627	658	112	176	694	446	798	462	477	558	322	1484	474	571	342	544	197	1246	194	386	338	928	779	801	44	918	613	801	637	670	294	922	105	2202	104	472	452	672	654	374	1	1350	50	30	422
ENSG00000137941	ENSG00000137941	TTLL7	tubulin tyrosine ligase like 7 [Source:HGNC Symbol;Acc:HGNC:26242]	protein_coding	1	49	15	23	119	33	7	12	12	8	115	7	102	17	136	1	11	31	8	88	126	53	27	22	21	31	19	62	183	46	36	17	7	151	47	1	23	1	10	2	11	0	2	54	29
ENSG00000223720	ENSG00000223720		novel transcript	lncRNA	0	0	0	0	0	12	0	0	3	0	0	0	0	0	0	0	1	1	0	17	3	0	1	3	0	6	0	6	12	0	0	2	1	0	2	4	0	2	0	0	0	0	0	47	1
ENSG00000286548	ENSG00000286548		novel transcript, antisense to LRRC8B	lncRNA	3	45	3	1	23	9	19	6	2	11	18	0	2	7	17	1	5	5	2	32	16	57	18	2	2	12	5	15	25	30	5	20	6	0	20	15	7	4	2	144	3	0	6	38	36
ENSG00000066135	ENSG00000066135	KDM4A	lysine demethylase 4A [Source:HGNC Symbol;Acc:HGNC:22978]	protein_coding	145	445	47	74	467	265	374	223	157	197	51	676	311	115	147	104	98	324	49	181	349	255	363	248	56	307	456	315	456	619	60	145	109	749	81	16	380	27	34	415	0	4	0	77	121
ENSG00000230027	ENSG00000230027		novel transcript	lncRNA	0	0	0	1	0	5	1	0	0	51	0	0	0	0	6	0	0	7	0	5	0	38	1	4	1	2	0	0	0	0	0	0	0	0	0	5	0	4	12	2	0	0	0	2	6
ENSG00000233061	ENSG00000233061	TTLL7-IT1	TTLL7 intronic transcript 1 [Source:HGNC Symbol;Acc:HGNC:41486]	lncRNA	0	6	0	1	1	2	2	0	0	2	0	0	0	0	6	1	0	1	3	17	1	42	0	0	0	0	8	12	3	3	7	0	0	0	1	0	0	8	0	0	0	0	0	3	6
ENSG00000272094	ENSG00000272094		novel transcript	lncRNA	0	0	0	1	1	0	0	1	0	0	0	0	0	2	5	0	1	1	0	9	0	0	0	0	0	10	0	5	0	0	0	0	0	0	0	0	0	0	0	8	0	0	0	2	0
ENSG00000232453	ENSG00000232453	LINC02777	long intergenic non-protein coding RNA 2777 [Source:HGNC Symbol;Acc:HGNC:54297]	lncRNA	55	42	3	15	21	22	48	9	12	60	27	24	33	22	29	0	9	31	8	14	67	23	12	10	7	8	13	14	46	22	30	18	10	95	10	11	9	2	23	69	14	0	21	22	23
ENSG00000260386	ENSG00000260386	LDC1P	leucine decarboxylase 1, pseudogene [Source:HGNC Symbol;Acc:HGNC:49677]	transcribed_unitary_pseudogene	0	0	3	10	3	41	0	1	2	3	0	4	0	0	14	1	1	8	0	2	0	53	2	8	0	7	0	17	5	8	1	5	0	12	24	6	0	16	3	1	6	7	2	36	31
ENSG00000117174	ENSG00000117174	ZNHIT6	zinc finger HIT-type containing 6 [Source:HGNC Symbol;Acc:HGNC:26089]	protein_coding	94	427	78	101	583	400	285	164	156	617	164	842	477	295	280	403	20	436	85	200	869	694	518	93	127	246	265	255	1015	429	143	164	97	498	210	6	135	27	343	50	475	0	0	19	17
ENSG00000237413	ENSG00000237413	MGC27382	uncharacterized MGC27382 [Source:NCBI gene (formerly Entrezgene);Acc:149047]	lncRNA	1	5	0	0	0	0	0	0	0	0	0	0	1	1	5	0	0	1	0	1	0	46	1	1	3	8	0	0	0	3	19	0	1	0	0	0	0	0	8	0	0	0	2	1	2
ENSG00000184313	ENSG00000184313	MROH7	maestro heat like repeat family member 7 [Source:HGNC Symbol;Acc:HGNC:24802]	protein_coding	1	29	1	46	44	57	4	14	13	103	0	45	5	1	52	1	5	70	12	77	16	56	34	23	14	54	20	64	30	140	64	14	3	16	43	42	73	11	12	16	15	1	13	99	55
ENSG00000284645	ENSG00000284645		novel transcript	lncRNA	0	17	2	8	0	36	0	25	0	6	0	1	0	1	0	10	0	40	0	0	0	2	1	0	0	6	0	1	0	0	0	0	0	37	0	5	0	6	17	0	0	0	0	0	7
ENSG00000225605	ENSG00000225605		novel transcript	lncRNA	0	3	0	2	2	19	0	10	0	25	0	19	2	0	4	0	10	11	0	26	1	3	4	7	8	2	4	3	0	7	2	0	0	0	1	4	0	1	18	0	0	0	0	17	3
ENSG00000225446	ENSG00000225446	LINC01763	long intergenic non-protein coding RNA 1763 [Source:HGNC Symbol;Acc:HGNC:52554]	lncRNA	0	2	0	9	0	0	0	5	1	1	0	0	0	0	7	0	0	0	0	0	0	0	4	0	2	2	2	13	0	0	1	6	2	0	9	4	7	0	0	19	3	1	1	7	8
ENSG00000122420	ENSG00000122420	PTGFR	prostaglandin F receptor [Source:HGNC Symbol;Acc:HGNC:9600]	protein_coding	0	37	3	5	144	29	233	21	7	11	37	0	132	0	131	0	24	48	31	63	168	28	2	4	32	0	40	36	353	0	141	3	41	3	82	9	4	5	26	0	0	0	5	21	14
ENSG00000284240	ENSG00000284240	LINC02801	long intergenic non-protein coding RNA 2801 [Source:HGNC Symbol;Acc:HGNC:54325]	lncRNA	3	16	0	7	20	3	0	3	8	37	0	0	0	6	6	0	1	22	3	27	3	38	2	10	15	18	4	16	1	19	2	5	1	0	42	6	22	33	16	3	0	0	20	28	11
ENSG00000143013	ENSG00000143013	LMO4	LIM domain only 4 [Source:HGNC Symbol;Acc:HGNC:6644]	protein_coding	122	155	41	55	368	103	227	118	111	187	110	651	181	148	113	168	69	142	52	100	360	154	241	166	10	158	110	176	406	276	91	112	63	324	444	241	259	284	264	346	491	777	40	431	102
ENSG00000226084	ENSG00000226084		ribosomal protein L17 (RPL17) pseudogene	processed_pseudogene	21	37	7	15	37	23	19	19	8	20	11	63	21	35	12	19	8	43	7	17	32	22	30	23	4	29	11	33	38	37	15	9	12	70	10	20	3	9	17	12	17	22	8	16	4
ENSG00000134748	ENSG00000134748	PRPF38A	pre-mRNA processing factor 38A [Source:HGNC Symbol;Acc:HGNC:25930]	protein_coding	934	1866	510	574	1855	1400	1902	1105	644	2104	727	3265	1598	1408	638	1663	438	1959	512	1000	1658	2111	1646	1451	253	2011	1285	1791	2566	2081	836	738	489	3410	988	1760	1626	1175	1185	1182	3654	2374	19	49	1058
ENSG00000142892	ENSG00000142892	PIGK	phosphatidylinositol glycan anchor biosynthesis class K [Source:HGNC Symbol;Acc:HGNC:8965]	protein_coding	112	141	62	15	213	128	201	124	105	242	173	272	244	246	80	98	82	110	62	34	257	276	243	195	51	249	114	82	461	48	153	35	75	129	99	666	222	243	137	31	0	0	0	2	256
ENSG00000184005	ENSG00000184005	ST6GALNAC3	ST6 N-acetylgalactosaminide alpha-2,6-sialyltransferase 3 [Source:HGNC Symbol;Acc:HGNC:19343]	protein_coding	195	342	27	180	323	182	341	227	242	643	212	400	94	302	140	192	58	315	65	123	564	656	199	287	35	185	200	192	576	195	86	221	138	568	237	268	119	158	258	524	646	460	0	21	275
ENSG00000287743	ENSG00000287743		novel transcript, antisense to RIMS3	lncRNA	0	11	0	0	1	0	0	3	0	1	0	0	0	0	5	0	0	3	0	2	0	3	0	0	0	2	0	1	0	5	0	1	0	0	0	0	0	1	0	0	0	0	0	0	10
ENSG00000237505	ENSG00000237505	PKN2-AS1	PKN2 antisense RNA 1 [Source:HGNC Symbol;Acc:HGNC:50597]	lncRNA	3	44	2	12	17	35	19	13	6	15	2	2	6	3	53	24	6	39	10	70	9	91	13	24	25	43	16	20	20	31	7	6	4	30	84	26	11	23	25	7	4	0	88	52	30
ENSG00000197273	ENSG00000197273	GUCA2A	guanylate cyclase activator 2A [Source:HGNC Symbol;Acc:HGNC:4682]	protein_coding	0	0	1	8	20	11	0	4	0	2	0	12	2	0	2	0	0	1	0	7	0	22	0	20	1	0	6	3	4	14	7	6	0	7	88	2	0	0	8	18	0	0	0	15	11
ENSG00000230728	ENSG00000230728		novel transcript	lncRNA	1	5	1	8	8	10	0	1	4	12	0	0	0	0	2	0	0	1	5	2	10	10	0	0	1	0	4	5	0	0	8	1	0	11	1	0	0	1	1	0	6	0	7	11	0
ENSG00000162402	ENSG00000162402	USP24	ubiquitin specific peptidase 24 [Source:HGNC Symbol;Acc:HGNC:12623]	protein_coding	106	435	40	277	421	285	184	268	131	675	388	929	243	209	117	169	80	543	82	487	289	336	269	219	80	640	199	235	621	962	125	211	51	360	182	100	395	39	225	174	5	6	6	101	111
ENSG00000219201	ENSG00000219201		novel pseudogene	processed_pseudogene	3	11	4	1	8	6	8	12	4	13	3	22	7	12	5	2	4	10	3	11	9	12	10	2	1	8	2	7	40	15	10	8	2	15	2	9	2	0	1	5	0	2	0	0	1
ENSG00000230787	ENSG00000230787	PSAT1P3	phosphoserine aminotransferase 1 pseudogene 3 [Source:HGNC Symbol;Acc:HGNC:43989]	processed_pseudogene	0	0	0	0	0	0	0	0	0	0	0	1	0	0	0	0	0	1	0	0	0	1	0	0	0	9	0	0	0	0	0	1	0	0	0	0	2	0	0	0	0	0	0	0	1
ENSG00000116641	ENSG00000116641	DOCK7	dedicator of cytokinesis 7 [Source:HGNC Symbol;Acc:HGNC:19190]	protein_coding	80	269	42	150	773	218	136	171	128	109	24	158	166	131	201	124	142	150	55	263	268	353	300	149	120	214	166	152	660	231	201	47	16	50	192	11	220	30	361	61	3	8	68	133	60
ENSG00000235927	ENSG00000235927	NEXN-AS1	NEXN antisense RNA 1 [Source:HGNC Symbol;Acc:HGNC:31983]	lncRNA	30	16	28	22	55	86	35	16	26	54	19	16	53	26	27	45	17	37	13	13	72	87	113	81	27	61	27	14	121	93	28	18	16	28	36	38	47	2	155	38	90	1	10	28	19
ENSG00000223920	ENSG00000223920		sepiapterin reductase (7,8-dihydrobiopterin:NADP+ oxidoreductase) (SPR) pseudogene	processed_pseudogene	0	0	5	0	0	7	0	0	0	16	0	0	0	0	14	2	0	0	0	6	1	15	0	0	1	0	0	7	2	0	0	0	0	0	0	5	0	0	1	11	0	0	12	8	13
ENSG00000172260	ENSG00000172260	NEGR1	neuronal growth regulator 1 [Source:HGNC Symbol;Acc:HGNC:17302]	protein_coding	195	23	103	22	1468	20	393	3	94	19	226	11	1128	12	478	0	273	8	101	71	1020	17	863	5	46	9	76	9	1649	7	508	7	123	20	17	7	282	2	484	0	8	0	3	2816	32
ENSG00000237959	ENSG00000237959	RPL36AP10	ribosomal protein L36a pseudogene 10 [Source:HGNC Symbol;Acc:HGNC:36175]	processed_pseudogene	0	2	0	0	0	0	0	1	0	0	0	0	0	0	4	2	0	14	0	11	0	0	0	16	0	0	0	2	0	0	0	0	0	0	17	0	1	0	1	0	0	0	0	5	0
ENSG00000231364	ENSG00000231364	LINC01712	long intergenic non-protein coding RNA 1712 [Source:HGNC Symbol;Acc:HGNC:52499]	lncRNA	0	3	0	5	0	0	4	0	3	0	0	1	0	2	0	0	3	6	11	11	11	6	1	0	0	0	2	1	0	17	0	0	0	0	0	0	12	0	7	0	0	0	0	0	13
ENSG00000117480	ENSG00000117480	FAAH	fatty acid amide hydrolase [Source:HGNC Symbol;Acc:HGNC:3553]	protein_coding	30	16	0	5	8	5	4	1	17	5	9	54	67	57	23	84	7	34	14	15	67	9	19	16	4	17	71	42	3	31	16	9	12	48	2	8	15	7	4	2	7	352	21	37	22
ENSG00000137944	ENSG00000137944	KYAT3	kynurenine aminotransferase 3 [Source:HGNC Symbol;Acc:HGNC:33238]	protein_coding	512	846	168	223	876	539	1049	431	260	587	284	1561	510	861	398	453	104	665	220	357	794	550	563	384	71	720	484	536	1114	538	393	367	327	1201	28	321	270	671	663	512	1016	827	774	2107	198
ENSG00000229505	ENSG00000229505		novel pseudogene	processed_pseudogene	0	2	1	23	1	12	6	5	4	14	0	0	0	2	18	0	1	12	0	11	14	62	9	1	13	22	3	14	4	0	9	0	0	0	0	0	1	2	13	0	0	0	3	5	3
ENSG00000182183	ENSG00000182183	SHISAL2A	shisa like 2A [Source:HGNC Symbol;Acc:HGNC:28757]	protein_coding	13	35	6	27	99	48	5	19	17	51	7	76	23	19	19	88	2	42	6	39	34	60	16	5	8	29	16	72	13	48	22	15	2	49	6	146	2	21	32	3	3	0	0	34	46
ENSG00000271949	ENSG00000271949		novel transcript, LRRC8C-LRRC8D readthrough	protein_coding	50	125	26	74	83	121	116	56	78	199	73	226	102	130	61	109	7	100	32	56	70	80	206	131	21	106	88	94	235	256	62	39	42	128	229	108	14	0	72	102	75	260	0	1	9
ENSG00000227062	ENSG00000227062		ubiquitin-conjugating enzyme E2 variant 1 (UBE2V1) pseudogene	processed_pseudogene	0	6	0	5	0	10	1	0	1	8	0	14	0	0	5	0	0	9	0	9	0	0	0	6	3	1	0	5	0	0	0	5	0	0	50	0	0	0	0	3	0	0	0	0	0
ENSG00000067334	ENSG00000067334	DNTTIP2	deoxynucleotidyltransferase terminal interacting protein 2 [Source:HGNC Symbol;Acc:HGNC:24013]	protein_coding	1186	2481	634	632	2748	1110	2395	1209	666	2135	1222	3787	1766	1920	924	1732	602	2455	573	990	2635	3224	1962	1249	229	1931	1200	1638	3317	3148	1052	1412	732	3035	1189	1936	1651	1601	1443	2515	2015	3816	1723	4203	1671
ENSG00000235673	ENSG00000235673		ribosomal protein S2 (RPS2) pseudogene	processed_pseudogene	0	1	0	16	22	17	0	0	1	7	0	0	1	0	4	0	8	4	0	5	0	31	2	0	3	8	7	12	3	19	11	3	0	0	35	0	0	0	3	0	1	0	8	13	1
ENSG00000287587	ENSG00000287587		novel transcript	lncRNA	1	6	0	2	0	2	0	0	1	3	0	0	0	0	0	5	0	8	0	12	7	13	1	2	0	3	1	1	0	14	2	0	0	0	46	5	2	1	20	2	3	0	0	10	10
ENSG00000142949	ENSG00000142949	PTPRF	protein tyrosine phosphatase receptor type F [Source:HGNC Symbol;Acc:HGNC:9670]	protein_coding	50	34	11	17	284	52	29	14	11	81	30	51	30	11	110	10	29	165	11	65	70	229	33	35	16	66	24	68	143	86	69	33	30	95	67	183	164	19	47	88	15	3	164	161	123
ENSG00000116133	ENSG00000116133	DHCR24	24-dehydrocholesterol reductase [Source:HGNC Symbol;Acc:HGNC:2859]	protein_coding	179	157	94	67	453	120	254	47	132	253	149	269	86	108	252	11	90	194	45	17	398	373	350	103	24	182	60	104	431	232	173	51	148	480	29	28	26	5	545	378	1	0	100	142	51
ENSG00000171502	ENSG00000171502	COL24A1	collagen type XXIV alpha 1 chain [Source:HGNC Symbol;Acc:HGNC:20821]	protein_coding	6	29	7	12	5	33	2	11	5	11	0	4	1	2	15	50	9	9	5	61	96	55	10	3	9	18	6	22	60	11	5	8	1	16	19	7	7	0	12	11	2	5	5	79	28
ENSG00000162399	ENSG00000162399	BSND	barttin CLCNK type accessory subunit beta [Source:HGNC Symbol;Acc:HGNC:16512]	protein_coding	4	0	0	0	3	6	5	1	0	15	0	0	0	0	8	0	2	32	0	11	2	2	4	0	0	35	9	7	3	4	2	0	0	1	36	22	2	9	10	3	3	0	67	66	57
ENSG00000116157	ENSG00000116157	GPX7	glutathione peroxidase 7 [Source:HGNC Symbol;Acc:HGNC:4559]	protein_coding	43	49	13	19	84	31	118	26	7	51	48	96	40	83	15	38	8	43	30	32	156	14	102	75	4	99	48	47	143	68	47	29	16	81	60	6	37	103	3	52	0	0	53	8	15
ENSG00000143036	ENSG00000143036	SLC44A3	solute carrier family 44 member 3 [Source:HGNC Symbol;Acc:HGNC:28689]	protein_coding	1	21	2	16	51	11	22	0	6	13	0	0	9	0	8	1	0	37	0	26	43	28	4	22	2	0	26	17	181	53	36	7	12	12	0	4	0	0	24	0	0	0	30	81	11
ENSG00000232672	ENSG00000232672	ACTG1P21	actin gamma 1 pseudogene 21 [Source:HGNC Symbol;Acc:HGNC:51501]	processed_pseudogene	0	1	0	2	0	0	0	0	1	5	0	2	1	1	12	1	1	8	0	12	0	58	0	0	0	1	0	2	0	0	0	0	0	0	0	3	0	1	0	1	0	0	3	25	6
ENSG00000230817	ENSG00000230817	LINC01362	long intergenic non-protein coding RNA 1362 [Source:HGNC Symbol;Acc:HGNC:50596]	lncRNA	0	4	1	3	0	6	0	5	2	12	0	0	0	0	9	0	0	7	0	18	0	4	0	0	1	1	0	3	4	2	0	0	2	0	0	0	21	0	1	4	0	0	0	26	9
ENSG00000235613	ENSG00000235613	NSRP1P1	nuclear speckle splicing regulatory protein 1 pseudogene 1 [Source:HGNC Symbol;Acc:HGNC:38087]	processed_pseudogene	0	0	0	3	1	1	0	1	0	1	1	1	1	0	0	0	0	32	0	10	0	0	0	10	0	1	0	0	1	0	0	0	0	0	0	0	0	1	0	0	0	0	0	15	4
ENSG00000065243	ENSG00000065243	PKN2	protein kinase N2 [Source:HGNC Symbol;Acc:HGNC:9406]	protein_coding	350	267	79	54	668	224	418	113	224	264	141	291	422	213	145	219	323	276	139	221	345	221	583	421	111	472	252	139	800	575	318	160	192	150	5	8	77	219	51	140	41	0	5	20	18
ENSG00000226759	ENSG00000226759	DAB1-AS1	DAB1 antisense RNA 1 [Source:HGNC Symbol;Acc:HGNC:49443]	lncRNA	0	6	0	2	0	16	0	2	3	20	0	0	0	0	8	0	1	12	0	21	0	5	1	4	4	0	0	11	0	0	2	3	0	1	0	2	4	3	18	2	1	1	20	51	17
ENSG00000226960	ENSG00000226960	MTCO1P21	MT-CO1 pseudogene 21 [Source:HGNC Symbol;Acc:HGNC:52086]	unprocessed_pseudogene	0	2	0	2	0	0	0	0	0	1	0	0	0	0	0	0	0	0	3	2	0	59	0	0	0	0	0	0	0	14	0	0	0	0	0	0	0	1	0	0	0	0	63	0	34
ENSG00000237899	ENSG00000237899		novel transcript	lncRNA	0	6	1	8	1	2	3	3	1	11	0	4	1	0	1	0	3	17	1	3	2	7	2	8	5	2	3	20	0	5	6	4	3	13	9	9	25	0	0	2	0	24	50	5	5
ENSG00000225492	ENSG00000225492	GBP1P1	guanylate binding protein 1 pseudogene 1 [Source:HGNC Symbol;Acc:HGNC:39561]	transcribed_unprocessed_pseudogene	32	42	13	22	187	15	28	13	22	35	154	163	92	99	90	21	20	73	25	246	152	54	89	6	35	47	51	60	178	40	128	121	39	82	20	1	42	2	63	97	0	0	0	26	14
ENSG00000223905	ENSG00000223905		peroxiredoxin 5 (PRDX5) pseudogene	processed_pseudogene	0	17	0	5	0	1	0	7	2	9	0	0	0	0	4	0	0	2	0	6	0	2	4	4	5	0	0	7	1	0	5	2	1	0	65	4	0	1	0	29	2	0	39	1	3
ENSG00000227290	ENSG00000227290	LINC01364	long intergenic non-protein coding RNA 1364 [Source:HGNC Symbol;Acc:HGNC:50599]	lncRNA	0	10	0	0	0	0	0	9	0	37	0	0	0	0	0	0	0	23	1	11	0	11	0	4	0	2	0	8	1	0	1	0	0	0	0	3	0	0	3	0	0	0	0	0	8
ENSG00000231090	ENSG00000231090	MIR4422HG	MIR4422 host gene [Source:HGNC Symbol;Acc:HGNC:53113]	lncRNA	0	31	1	10	41	3	5	6	1	46	0	2	0	0	12	1	1	12	0	17	1	38	0	8	4	42	6	0	29	32	3	0	0	0	169	0	15	2	9	0	0	0	68	0	10
ENSG00000117528	ENSG00000117528	ABCD3	ATP binding cassette subfamily D member 3 [Source:HGNC Symbol;Acc:HGNC:67]	protein_coding	268	861	86	271	495	337	359	409	313	775	495	733	620	752	226	363	76	568	145	345	852	615	768	669	98	702	481	463	1081	649	126	160	123	715	28	5	161	318	411	116	3	0	5	23	23
ENSG00000271723	ENSG00000271723	MROH7-TTC4	MROH7-TTC4 readthrough (NMD candidate) [Source:HGNC Symbol;Acc:HGNC:49180]	protein_coding	115	431	42	195	295	349	410	263	90	580	260	566	282	245	311	192	90	374	144	307	523	473	298	380	54	252	224	376	771	680	163	262	140	689	424	320	303	405	296	608	911	2247	13	72	153
ENSG00000172339	ENSG00000172339	ALG14	ALG14 UDP-N-acetylglucosaminyltransferase subunit [Source:HGNC Symbol;Acc:HGNC:28287]	protein_coding	69	168	27	101	156	164	118	58	67	146	52	151	164	64	118	61	48	224	32	137	184	303	272	153	68	170	69	168	240	245	111	59	52	225	98	250	62	32	172	58	0	199	64	49	54
ENSG00000036549	ENSG00000036549	ZZZ3	zinc finger ZZ-type containing 3 [Source:HGNC Symbol;Acc:HGNC:24523]	protein_coding	277	1052	303	228	861	597	381	460	287	510	232	1319	535	564	280	535	232	669	218	267	455	953	601	325	81	604	677	618	1099	512	346	343	210	625	464	6	160	3	493	871	152	613	7	7	339
ENSG00000287724	ENSG00000287724		novel transcript, antisense to DHCR24	lncRNA	11	18	10	9	60	12	36	4	13	30	10	32	16	16	26	9	13	22	7	5	59	51	40	18	4	31	9	6	81	46	23	6	12	60	0	0	19	0	52	42	0	0	0	4	3
ENSG00000058799	ENSG00000058799	YIPF1	Yip1 domain family member 1 [Source:HGNC Symbol;Acc:HGNC:25231]	protein_coding	621	409	81	204	333	508	913	282	317	748	581	891	712	562	429	492	215	610	193	261	539	542	624	391	81	583	332	425	903	768	278	407	206	1141	210	13	483	492	496	788	739	1537	5452	14	667
ENSG00000273637	ENSG00000273637		novel transcript	lncRNA	413	574	92	129	448	494	467	288	205	738	304	1048	425	481	153	330	129	414	139	224	261	594	540	429	73	603	444	819	514	672	254	229	121	782	155	178	291	465	232	139	252	406	842	254	108
ENSG00000203985	ENSG00000203985	LDLRAD1	low density lipoprotein receptor class A domain containing 1 [Source:HGNC Symbol;Acc:HGNC:32069]	protein_coding	0	2	0	7	14	1	0	0	0	2	0	1	0	0	1	0	0	11	0	0	1	10	3	0	1	0	0	1	0	14	4	0	0	0	7	64	1	2	0	0	0	0	3	35	12
ENSG00000283761	ENSG00000283761		novel protein	protein_coding	252	654	128	148	429	471	948	250	246	502	446	973	1015	619	293	426	293	502	251	307	722	489	694	235	122	448	385	429	844	936	425	317	163	659	158	496	555	214	275	510	8	236	36	24	225
ENSG00000189433	ENSG00000189433	GJB4	gap junction protein beta 4 [Source:HGNC Symbol;Acc:HGNC:4286]	protein_coding	8	0	0	1	0	0	0	0	0	12	0	0	0	0	20	0	0	2	0	0	0	1	0	0	0	0	0	0	4	1	4	0	0	0	5	2	7	0	0	0	0	2	0	20	6
ENSG00000179178	ENSG00000179178	TMEM125	transmembrane protein 125 [Source:HGNC Symbol;Acc:HGNC:28275]	protein_coding	0	6	2	0	0	0	0	0	3	0	0	1	7	0	3	0	0	4	0	6	32	33	1	1	0	30	4	4	1	2	2	4	0	0	12	13	1	3	42	1	0	0	27	6	21
ENSG00000142700	ENSG00000142700	DMRTA2	DMRT like family A2 [Source:HGNC Symbol;Acc:HGNC:13908]	protein_coding	1	0	0	4	0	2	0	7	0	0	0	0	0	0	0	0	0	4	0	0	0	9	2	1	2	0	0	5	0	2	1	0	0	0	9	9	4	0	19	0	2	0	66	71	45
ENSG00000285525	ENSG00000285525		novel transcript	lncRNA	0	5	1	9	0	11	0	0	8	19	0	0	0	0	1	0	0	22	0	8	1	0	2	0	1	0	1	7	0	35	0	0	1	21	0	9	1	6	4	0	0	0	0	12	4
ENSG00000236098	ENSG00000236098		novel transcript	lncRNA	0	15	0	3	9	0	0	0	0	0	9	1	0	0	7	1	0	8	1	13	0	0	6	0	0	13	5	2	2	7	4	3	0	0	34	0	0	0	0	0	0	0	0	0	4
ENSG00000127124	ENSG00000127124	HIVEP3	HIVEP zinc finger 3 [Source:HGNC Symbol;Acc:HGNC:13561]	protein_coding	39	84	42	20	138	26	110	52	53	64	122	474	119	53	109	28	23	97	33	30	167	173	212	64	13	51	69	66	96	176	64	46	55	68	47	51	164	7	98	108	210	5	38	126	77
ENSG00000266993	ENSG00000266993		novel transcript, antisense to NRD1	lncRNA	446	708	151	109	568	529	574	415	299	683	309	1156	615	534	207	592	146	769	130	402	469	683	741	526	103	901	552	487	932	878	269	402	148	1208	407	389	496	349	376	462	388	481	585	48	72
ENSG00000223675	ENSG00000223675		novel transcript	lncRNA	0	18	0	0	0	0	1	0	0	5	0	0	5	1	0	0	0	9	3	26	0	11	0	0	0	4	1	0	0	0	2	0	0	1	0	3	12	0	3	0	1	0	0	17	5
ENSG00000162604	ENSG00000162604	TM2D1	TM2 domain containing 1 [Source:HGNC Symbol;Acc:HGNC:24142]	protein_coding	181	174	52	79	140	119	351	85	80	138	214	384	162	127	122	151	74	218	70	115	375	215	182	91	47	132	109	115	250	214	206	79	79	269	126	9	159	109	126	163	452	423	26	992	70
ENSG00000116171	ENSG00000116171	SCP2	sterol carrier protein 2 [Source:HGNC Symbol;Acc:HGNC:10606]	protein_coding	2188	3032	749	681	4494	1976	2958	1133	1324	4062	2079	5508	3305	3854	1800	1710	775	1766	847	876	5103	2698	3711	1995	354	3210	3074	4141	5355	3093	1990	810	943	3990	2270	1575	1829	3181	3252	1672	4889	2496	1694	4000	1134
ENSG00000225767	ENSG00000225767	FAF1-AS1	FAF1 antisense RNA 1 [Source:HGNC Symbol;Acc:HGNC:40228]	lncRNA	0	5	0	23	1	4	0	0	6	6	0	0	0	0	10	0	12	4	0	19	4	15	0	2	3	10	1	7	0	5	0	0	0	0	37	0	3	0	5	12	0	0	15	0	2
ENSG00000234099	ENSG00000234099	MTND4P11	MT-ND4 pseudogene 11 [Source:HGNC Symbol;Acc:HGNC:42223]	unprocessed_pseudogene	2	42	1	9	66	16	1	1	5	13	0	9	2	1	27	0	7	2	0	57	0	45	4	8	14	8	0	24	10	1	2	7	2	21	26	1	28	0	0	0	0	0	0	0	5
ENSG00000137936	ENSG00000137936	BCAR3	BCAR3 adaptor protein, NSP family member [Source:HGNC Symbol;Acc:HGNC:973]	protein_coding	106	219	67	79	574	191	139	188	61	253	184	276	320	199	173	317	30	110	60	113	433	301	459	69	32	111	118	69	651	125	86	78	74	223	103	48	232	575	301	217	911	0	10	43	77
ENSG00000232752	ENSG00000232752	MTCO3P21	MT-CO3 pseudogene 21 [Source:HGNC Symbol;Acc:HGNC:52083]	unprocessed_pseudogene	0	5	0	2	1	0	0	5	1	0	0	0	0	0	0	0	3	3	2	5	0	15	0	0	6	7	0	8	0	0	0	0	0	0	0	0	0	0	0	0	0	0	0	0	8
ENSG00000235829	ENSG00000235829	TBCAP2	tubulin folding cofactor A pseudogene 2 [Source:HGNC Symbol;Acc:HGNC:42631]	processed_pseudogene	0	10	0	5	1	0	0	6	3	1	0	10	0	0	2	0	2	0	0	6	1	0	0	0	5	0	5	7	1	25	1	0	4	0	71	0	0	0	0	2	0	1	0	23	2
ENSG00000143032	ENSG00000143032	BARHL2	BarH like homeobox 2 [Source:HGNC Symbol;Acc:HGNC:954]	protein_coding	0	1	0	1	0	5	1	2	0	0	0	0	0	0	0	2	0	0	0	0	0	19	0	2	1	4	2	0	8	1	0	0	0	0	1	2	3	1	0	15	4	0	0	7	2
ENSG00000226745	ENSG00000226745	OAZ1P1	OAZ1 pseudogene 1 [Source:HGNC Symbol;Acc:HGNC:54556]	processed_pseudogene	4	1	8	7	11	4	0	0	5	13	0	3	1	1	2	1	0	4	0	5	11	32	8	8	7	3	1	21	3	9	7	2	1	2	22	2	3	7	18	0	2	0	0	6	3
ENSG00000178028	ENSG00000178028	DMAP1	DNA methyltransferase 1 associated protein 1 [Source:HGNC Symbol;Acc:HGNC:18291]	protein_coding	324	531	102	34	851	227	257	203	119	421	231	715	182	338	152	336	76	386	123	167	490	295	468	165	58	479	288	401	671	490	310	223	126	552	716	414	191	861	167	216	905	974	22	113	241
ENSG00000280040	ENSG00000280040		novel transcript	TEC	0	2	0	0	0	0	10	0	3	1	0	16	17	0	0	0	0	6	0	3	0	19	0	0	2	1	0	3	0	1	0	0	4	0	3	0	0	0	0	0	0	0	0	0	1
ENSG00000168710	ENSG00000168710	AHCYL1	adenosylhomocysteinase like 1 [Source:HGNC Symbol;Acc:HGNC:344]	protein_coding	1056	1673	429	395	2567	1089	1148	874	532	2069	689	3227	2066	1719	1096	824	380	1728	439	771	2270	1235	1862	864	245	1854	1094	1434	3647	2562	949	635	421	1493	969	1287	1042	1921	2186	1376	1510	1310	13864	40	1217
ENSG00000117519	ENSG00000117519	CNN3	calponin 3 [Source:HGNC Symbol;Acc:HGNC:2157]	protein_coding	6055	3310	2868	828	9175	1805	10741	1886	3027	4575	3389	3459	7246	3803	3623	2349	1721	1393	2370	479	19055	4025	14721	2107	798	1403	2505	830	11934	2007	3996	1050	3571	4185	5820	4231	5492	2433	7044	3495	15547	3018	8044	2916	2576
ENSG00000238037	ENSG00000238037	OOSP1P1	oocyte secreted protein 1 pseudogene 1 [Source:HGNC Symbol;Acc:HGNC:49240]	processed_pseudogene	0	8	4	9	3	1	2	4	3	0	0	0	0	0	7	0	1	8	0	6	5	16	3	0	7	0	7	27	0	8	0	0	0	0	66	0	0	0	5	0	0	0	0	3	1
ENSG00000215869	ENSG00000215869		THAP domain containing, apoptosis associated protein 3 (THAP3) pseudogene	transcribed_processed_pseudogene	0	7	0	28	1	39	1	6	22	0	0	0	0	1	15	0	2	3	1	46	4	25	24	10	26	10	7	9	2	17	13	8	12	3	13	0	0	1	21	42	3	0	0	6	13
ENSG00000134215	ENSG00000134215	VAV3	vav guanine nucleotide exchange factor 3 [Source:HGNC Symbol;Acc:HGNC:12659]	protein_coding	474	909	178	197	603	692	1061	443	312	1016	496	1173	623	824	216	1070	349	837	226	575	737	790	731	676	105	872	741	782	420	1058	398	407	143	1010	761	28	476	125	163	534	0	905	62	15	31
ENSG00000227935	ENSG00000227935		novel transcript	lncRNA	0	0	1	4	0	4	0	0	2	2	0	0	0	0	4	0	0	5	0	1	0	28	0	0	0	0	0	2	0	4	0	0	5	0	0	0	3	0	1	0	0	4	0	3	6
ENSG00000229887	ENSG00000229887	HNRNPA1P6	heterogeneous nuclear ribonucleoprotein A1 pseudogene 6 [Source:HGNC Symbol;Acc:HGNC:5032]	transcribed_unprocessed_pseudogene	0	0	1	0	1	0	1	0	0	0	0	10	0	0	6	0	0	23	0	4	0	2	0	0	0	1	0	0	0	0	1	0	0	0	4	0	0	0	3	0	0	0	0	4	3
ENSG00000228502	ENSG00000228502	EEF1A1P11	eukaryotic translation elongation factor 1 alpha 1 pseudogene 11 [Source:HGNC Symbol;Acc:HGNC:3206]	processed_pseudogene	24	35	11	15	57	44	41	19	10	42	24	100	22	41	24	26	13	37	19	19	42	37	59	26	2	23	22	44	67	50	13	8	6	71	4	6	8	7	16	10	8	12	58	7	3
ENSG00000236268	ENSG00000236268	LINC01361	long intergenic non-protein coding RNA 1361 [Source:HGNC Symbol;Acc:HGNC:50595]	lncRNA	0	0	0	0	11	10	0	2	4	1	0	0	0	0	3	0	0	22	2	31	0	72	3	1	0	3	4	8	0	1	0	0	1	0	0	11	0	0	2	1	0	1	0	14	18
ENSG00000279778	ENSG00000279778		TEC	TEC	23	31	0	5	42	0	0	0	1	32	0	0	4	0	1	0	0	0	0	40	1	3	4	17	5	0	0	0	0	16	0	0	0	0	7	1	0	0	0	19	0	0	9	0	7
ENSG00000230955	ENSG00000230955		novel transcript	lncRNA	22	67	6	12	37	66	24	35	15	74	3	110	58	94	38	37	14	73	12	34	111	47	26	60	6	94	55	33	63	199	2	30	26	41	25	39	21	24	109	33	0	0	0	14	3
ENSG00000188641	ENSG00000188641	DPYD	dihydropyrimidine dehydrogenase [Source:HGNC Symbol;Acc:HGNC:3012]	protein_coding	1540	2706	571	905	3205	1846	1819	1366	1023	3186	1347	3025	2430	2044	590	2532	253	2939	401	2216	1651	3142	2022	1105	218	2924	1541	2573	1972	3093	1212	1330	482	4688	1079	2901	1483	1698	1582	2213	1282	1851	4064	24	201
ENSG00000152078	ENSG00000152078	TLCD4	TLC domain containing 4 [Source:HGNC Symbol;Acc:HGNC:26477]	protein_coding	372	943	99	265	570	521	617	494	288	941	557	744	537	460	211	466	161	1466	90	639	536	431	1201	1549	133	1634	164	426	739	2006	78	195	108	809	227	702	569	553	244	73	667	0	1719	38	219
ENSG00000237279	ENSG00000237279	H3P2	H3 histone pseudogene 2 [Source:HGNC Symbol;Acc:HGNC:43795]	processed_pseudogene	1	16	0	4	6	8	1	0	3	7	0	0	0	2	9	0	1	4	0	18	0	32	19	19	9	24	1	5	0	5	2	7	0	0	0	0	0	0	0	0	0	0	50	0	2
ENSG00000233359	ENSG00000233359		novel transcript	lncRNA	0	9	0	15	0	21	0	0	4	1	0	0	0	0	0	0	0	1	0	4	0	4	3	2	1	0	0	7	0	0	0	2	2	0	0	4	0	0	0	0	0	0	0	1	2
ENSG00000185668	ENSG00000185668	POU3F1	POU class 3 homeobox 1 [Source:HGNC Symbol;Acc:HGNC:9214]	protein_coding	2	2	0	0	2	3	3	2	5	0	0	1	1	4	2	0	0	4	1	0	3	1	5	1	1	1	5	1	1	4	7	0	2	1	2	7	17	3	6	8	11	0	50	54	55
ENSG00000171492	ENSG00000171492	LRRC8D	leucine rich repeat containing 8 VRAC subunit D [Source:HGNC Symbol;Acc:HGNC:16992]	protein_coding	327	532	151	322	415	593	501	349	378	1108	350	593	411	568	282	548	38	458	186	297	409	412	910	682	140	463	476	400	1187	1218	367	180	192	558	970	569	118	0	481	391	5	506	27	24	14
ENSG00000233129	ENSG00000233129		pseudogene similar to part of NADH dehydrogenase 2 (MTND2)	processed_pseudogene	0	2	0	0	0	14	5	1	2	1	0	0	0	0	0	0	0	7	0	11	2	5	7	0	5	13	6	7	0	10	3	0	2	0	9	0	0	10	0	0	0	0	0	0	0
ENSG00000170989	ENSG00000170989	S1PR1	sphingosine-1-phosphate receptor 1 [Source:HGNC Symbol;Acc:HGNC:3165]	protein_coding	514	1115	482	443	664	826	952	852	280	1512	523	1307	487	649	322	1215	181	877	209	374	1422	1802	764	511	92	462	327	272	1136	947	423	538	258	2143	312	464	821	1362	462	1258	94	124	0	10	179
ENSG00000258634	ENSG00000258634		novel transcript, antisense to ALX3	lncRNA	5	11	11	2	0	0	18	1	0	15	0	0	39	1	10	0	2	11	0	2	2	31	0	0	0	3	0	6	11	22	0	3	2	0	50	9	1	4	3	1	11	231	3	84	115
ENSG00000116299	ENSG00000116299	ELAPOR1	endosome-lysosome associated apoptosis and autophagy regulator 1 [Source:HGNC Symbol;Acc:HGNC:29618]	protein_coding	168	30	22	29	169	100	348	13	98	61	117	67	234	31	71	74	31	36	6	32	123	140	16	30	65	69	74	59	126	107	51	32	17	39	79	27	154	8	139	5	1	12	59	55	49
ENSG00000137962	ENSG00000137962	ARHGAP29	Rho GTPase activating protein 29 [Source:HGNC Symbol;Acc:HGNC:30207]	protein_coding	559	1747	457	453	1879	896	1123	621	625	1401	835	876	1263	885	890	1006	239	728	318	405	2384	1589	1603	491	170	497	796	418	2275	742	744	475	454	1122	1294	1565	657	1584	1383	1652	2332	2	81	52	310
ENSG00000260464	ENSG00000260464		novel transcript	lncRNA	0	0	7	1	2	9	13	6	3	0	0	3	1	7	2	13	16	2	1	11	1	0	7	2	1	0	2	2	0	17	1	0	0	4	11	5	3	2	1	0	3	0	2	18	8
ENSG00000237435	ENSG00000237435	LINC02790	long intergenic non-protein coding RNA 2790 [Source:HGNC Symbol;Acc:HGNC:54313]	lncRNA	1	12	3	4	14	8	6	4	8	0	0	0	0	7	14	1	2	18	1	50	7	18	18	7	16	13	2	18	15	5	0	0	0	0	4	0	11	2	4	13	2	0	0	1	2
ENSG00000273204	ENSG00000273204		novel transcript, antisense to EXTL2	lncRNA	0	2	1	0	0	0	0	1	1	0	3	1	3	0	0	2	8	1	0	1	0	13	0	0	4	0	1	0	3	7	0	0	4	2	0	2	1	0	13	6	0	0	25	0	5
ENSG00000079739	ENSG00000079739	PGM1	phosphoglucomutase 1 [Source:HGNC Symbol;Acc:HGNC:8905]	protein_coding	1346	2045	309	309	2201	1408	2062	776	722	2551	862	2411	1446	2170	652	1012	379	1659	384	434	1137	1116	1781	1409	203	2423	1720	2021	2545	2227	800	604	492	2662	727	1087	1109	1180	905	1956	2071	1756	38	24	721
ENSG00000117154	ENSG00000117154	IGSF21	immunoglobin superfamily member 21 [Source:HGNC Symbol;Acc:HGNC:28246]	protein_coding	15	41	22	68	42	15	18	0	0	6	0	56	2	64	0	12	4	5	1	20	80	86	57	119	1	17	13	17	2	1	5	2	1	108	28	106	48	0	5	380	1	4	4	41	18
ENSG00000162377	ENSG00000162377	COA7	cytochrome c oxidase assembly factor 7 [Source:HGNC Symbol;Acc:HGNC:25716]	protein_coding	95	598	83	243	228	391	205	201	71	230	168	509	268	265	153	245	5	319	23	181	436	674	358	274	30	250	217	320	467	514	224	249	98	549	1	5	213	0	83	265	1	404	7	29	192
ENSG00000224613	ENSG00000224613	RNPC3-DT	RNPC3 divergent transcript [Source:HGNC Symbol;Acc:HGNC:55855]	lncRNA	0	2	0	5	2	0	0	5	2	0	0	2	0	0	9	0	0	13	1	8	10	7	8	1	4	0	4	1	2	0	4	1	1	2	0	10	0	20	3	27	0	0	0	17	12
ENSG00000287372	ENSG00000287372		novel transcript	lncRNA	5	33	2	5	21	3	3	3	4	16	0	0	5	4	15	0	3	2	0	68	12	68	12	2	4	18	4	5	0	0	0	1	0	0	2	13	4	5	8	1	1	0	6	7	14
ENSG00000231095	ENSG00000231095	GYG1P3	glycogenin 1 pseudogene 3 [Source:HGNC Symbol;Acc:HGNC:39711]	processed_pseudogene	0	19	0	1	1	5	0	0	0	61	1	0	0	0	2	0	1	1	0	23	0	24	0	25	0	15	2	1	0	2	0	2	0	2	0	1	0	0	0	0	3	0	2	10	36
ENSG00000116774	ENSG00000116774	OLFML3	olfactomedin like 3 [Source:HGNC Symbol;Acc:HGNC:24956]	protein_coding	275	39	113	2	1224	3	340	16	65	42	185	78	801	1	334	0	182	10	128	63	941	26	885	8	71	21	166	18	2521	0	305	0	163	56	648	60	347	0	1099	0	1301	1	72	3760	689
ENSG00000287756	ENSG00000287756		novel transcript, antisense to KAZN	lncRNA	0	26	3	20	48	51	0	15	7	86	0	28	2	4	28	2	9	31	3	37	4	73	10	5	10	12	10	69	8	44	2	9	3	7	115	5	1	0	6	3	4	0	3	8	29
ENSG00000269113	ENSG00000269113	TRABD2B	TraB domain containing 2B [Source:HGNC Symbol;Acc:HGNC:44200]	protein_coding	0	3	0	2	14	8	6	0	3	3	0	0	2	0	3	1	0	1	0	1	0	39	17	18	4	16	6	3	51	7	10	0	5	4	17	17	4	1	37	1	0	1	83	120	62
ENSG00000284652	ENSG00000284652		novel transcript	lncRNA	0	0	2	0	2	26	0	0	4	0	0	0	0	0	6	0	0	1	0	2	0	1	0	1	2	5	2	2	0	0	1	0	0	2	0	8	0	0	0	0	2	1	0	0	8
ENSG00000023909	ENSG00000023909	GCLM	glutamate-cysteine ligase modifier subunit [Source:HGNC Symbol;Acc:HGNC:4312]	protein_coding	610	2252	162	400	943	1687	509	952	339	1595	567	2346	570	1055	443	1055	198	4051	116	1221	585	1641	1050	2585	170	2350	690	1192	1015	3460	419	851	117	2059	235	556	231	2269	266	1144	3	1309	1909	1383	37
ENSG00000069702	ENSG00000069702	TGFBR3	transforming growth factor beta receptor 3 [Source:HGNC Symbol;Acc:HGNC:11774]	protein_coding	274	178	164	137	589	98	539	93	198	147	445	674	1060	167	273	83	193	182	172	177	1218	251	829	194	85	164	236	117	1967	337	226	122	222	89	637	29	217	11	604	120	25	20	77	23	142
ENSG00000230489	ENSG00000230489	VAV3-AS1	VAV3 antisense RNA 1 [Source:HGNC Symbol;Acc:HGNC:40608]	lncRNA	1	28	2	10	35	30	6	2	2	10	0	31	11	0	11	5	2	32	2	36	16	32	4	10	7	5	3	18	11	17	9	5	5	6	1	31	0	84	3	3	0	0	0	2	0
ENSG00000236776	ENSG00000236776	RPL21P23	ribosomal protein L21 pseudogene 23 [Source:HGNC Symbol;Acc:HGNC:36205]	processed_pseudogene	0	0	0	1	0	0	0	0	3	23	0	0	0	0	5	0	7	4	1	0	0	3	0	0	5	0	0	0	6	4	0	0	1	0	0	1	0	26	0	34	0	0	0	0	4
ENSG00000285928	ENSG00000285928		novel transcript	lncRNA	1	34	0	12	13	5	6	1	12	6	0	2	0	0	22	0	0	25	2	15	2	5	2	2	10	8	10	7	0	9	1	0	1	0	0	1	4	1	11	0	0	0	0	3	7
ENSG00000287076	ENSG00000287076		novel transcript	lncRNA	0	0	0	0	0	0	0	0	0	0	0	0	0	0	0	0	0	3	0	0	0	0	0	0	0	0	1	0	0	0	0	1	0	6	1	2	0	3	4	0	1	0	22	14	16
ENSG00000237480	ENSG00000237480		novel transcript	lncRNA	0	36	0	47	14	28	9	9	8	10	0	13	16	18	43	1	4	54	5	69	7	48	17	19	23	40	23	33	31	40	19	5	1	1	143	8	6	14	30	0	2	0	97	19	30
ENSG00000230427	ENSG00000230427	ALG14-AS1	ALG14 antisense RNA 1 [Source:HGNC Symbol;Acc:HGNC:41192]	lncRNA	0	2	3	0	0	0	2	6	0	0	0	0	1	0	11	0	2	7	0	12	12	10	0	0	2	3	11	2	0	25	1	0	0	9	1	3	0	4	0	0	0	0	0	1	12
ENSG00000286758	ENSG00000286758		novel transcript	lncRNA	3	4	0	6	0	2	1	4	3	6	0	0	2	0	6	3	0	2	0	17	0	22	16	4	0	5	6	11	5	2	6	2	4	5	112	4	5	0	5	0	0	0	0	3	31
ENSG00000237337	ENSG00000237337	ELAVL4-AS1	ELAVL4 antisense RNA 1 [Source:HGNC Symbol;Acc:HGNC:40210]	lncRNA	0	33	1	0	1	27	3	5	2	6	0	1	0	2	3	0	5	11	0	31	2	10	3	0	9	8	6	11	1	1	2	0	0	11	43	16	20	1	4	1	0	0	0	21	7
ENSG00000198198	ENSG00000198198	SZT2	SZT2 subunit of KICSTOR complex [Source:HGNC Symbol;Acc:HGNC:29040]	protein_coding	151	188	52	78	440	231	140	95	84	300	111	388	190	71	202	165	65	300	50	150	198	314	306	177	55	368	158	214	446	461	115	72	67	353	655	197	210	155	184	170	36	7	456	321	289
ENSG00000225183	ENSG00000225183		cytochrome c oxidase subunit VIIb (COX7B) pseudogene	processed_pseudogene	0	6	0	0	0	1	0	2	0	0	0	0	0	0	3	0	1	22	0	19	0	17	0	0	0	3	1	3	0	0	0	0	0	0	11	0	0	2	0	7	0	0	0	0	1
ENSG00000116793	ENSG00000116793	PHTF1	putative homeodomain transcription factor 1 [Source:HGNC Symbol;Acc:HGNC:8939]	protein_coding	329	457	118	57	604	462	515	283	268	701	239	823	574	512	203	587	150	500	96	312	312	792	245	294	112	867	400	582	1207	998	299	379	187	1023	340	406	334	1023	359	198	13	1082	32	32	447
ENSG00000134201	ENSG00000134201	GSTM5	glutathione S-transferase mu 5 [Source:HGNC Symbol;Acc:HGNC:4637]	protein_coding	46	4	73	1	571	10	172	0	58	63	118	13	311	42	235	6	18	20	36	46	392	101	258	12	37	60	134	63	984	156	492	20	123	10	633	12	151	0	1106	5	968	3	3	54	592
ENSG00000260879	ENSG00000260879		novel transcript, antisense to SLC25A24	lncRNA	89	177	26	49	124	146	155	130	63	157	69	353	125	129	55	265	20	210	18	75	204	220	109	71	10	125	97	150	176	163	27	52	45	327	1	302	108	102	92	170	2	263	14	0	19
ENSG00000213366	ENSG00000213366	GSTM2	glutathione S-transferase mu 2 [Source:HGNC Symbol;Acc:HGNC:4634]	protein_coding	64	99	22	15	164	62	100	32	77	233	55	224	136	41	122	110	61	70	22	40	261	183	214	153	16	147	51	61	215	118	145	93	52	285	351	9	143	78	318	292	249	446	59	71	207
ENSG00000230864	ENSG00000230864		novel transcript	lncRNA	0	4	0	0	0	0	1	0	1	0	0	2	0	0	1	8	0	0	0	2	0	0	4	0	0	7	0	1	0	0	0	2	0	0	0	3	0	0	1	0	0	1	0	24	11
ENSG00000232918	ENSG00000232918		ribosomal protein L21 (RPL21) pseudogene	processed_pseudogene	0	1	0	0	0	4	1	0	0	0	0	0	2	1	0	0	0	3	0	5	0	18	7	3	2	3	1	2	0	1	5	0	0	6	5	0	10	0	0	0	0	0	0	0	16
ENSG00000236360	ENSG00000236360	RRAS2P1	RRAS2 pseudogene 1 [Source:HGNC Symbol;Acc:HGNC:54561]	processed_pseudogene	0	0	0	0	0	4	2	1	1	0	1	1	6	5	0	2	2	1	0	0	1	10	2	0	0	13	0	0	1	7	1	0	0	0	0	0	1	0	2	0	0	0	0	0	9
ENSG00000183298	ENSG00000183298	RPSAP19	ribosomal protein SA pseudogene 19 [Source:HGNC Symbol;Acc:HGNC:36508]	processed_pseudogene	2	13	4	18	2	15	1	7	3	49	3	15	0	4	4	4	3	19	5	9	11	26	6	27	4	9	4	15	4	5	9	9	1	9	4	4	3	3	18	3	0	0	0	11	1
ENSG00000117525	ENSG00000117525	F3	coagulation factor III, tissue factor [Source:HGNC Symbol;Acc:HGNC:3541]	protein_coding	85	12	43	4	211	3	101	5	15	0	48	14	342	9	174	0	26	2	32	21	524	6	221	32	29	6	26	24	907	78	134	0	68	14	46	20	116	0	261	0	8	7	5	15	21
ENSG00000224238	ENSG00000224238	WARS2-IT1	WARS2 intronic transcript 1 [Source:HGNC Symbol;Acc:HGNC:41393]	lncRNA	1	8	1	1	4	4	12	10	2	4	0	2	0	0	5	2	3	2	1	12	27	56	31	0	2	2	2	11	123	27	1	0	5	0	2	1	1	0	0	0	0	2	0	12	7
ENSG00000229537	ENSG00000229537	LINC01739	long intergenic non-protein coding RNA 1739 [Source:HGNC Symbol;Acc:HGNC:52527]	lncRNA	0	14	0	0	0	1	2	0	1	3	0	0	0	3	11	0	1	0	0	11	0	0	1	1	4	0	5	0	0	28	0	7	0	0	36	7	0	1	2	0	1	0	5	0	4
ENSG00000162692	ENSG00000162692	VCAM1	vascular cell adhesion molecule 1 [Source:HGNC Symbol;Acc:HGNC:12663]	protein_coding	233	300	84	44	268	128	125	55	134	254	55	709	108	645	67	70	129	137	73	162	683	299	512	90	32	60	64	76	407	137	246	86	129	184	117	5	77	247	296	2886	1098	492	2120	3	20
ENSG00000270457	ENSG00000270457		novel transcript	lncRNA	0	10	5	1	0	6	0	2	2	2	0	0	0	3	3	1	0	23	0	2	0	19	3	13	13	1	3	13	1	0	1	1	3	0	0	0	0	0	0	0	2	0	0	0	0
ENSG00000203858	ENSG00000203858	HSD3BP2	hydroxy-delta-5-steroid dehydrogenase, 3 beta, pseudogene 2 [Source:HGNC Symbol;Acc:HGNC:5220]	unprocessed_pseudogene	0	13	0	0	2	32	0	8	0	0	0	0	0	1	3	0	1	15	0	32	0	46	0	0	0	6	1	13	0	45	0	11	0	0	26	3	0	2	1	0	0	7	0	4	10
ENSG00000224445	ENSG00000224445	LINC01708	long intergenic non-protein coding RNA 1708 [Source:HGNC Symbol;Acc:HGNC:52496]	lncRNA	1	2	2	4	7	11	0	3	0	0	0	3	0	0	2	0	2	6	0	18	15	1	0	2	5	1	1	9	0	6	0	0	3	0	0	0	0	0	3	0	0	0	0	11	4
ENSG00000229842	ENSG00000229842	MTATP6P13	MT-ATP6 pseudogene 13 [Source:HGNC Symbol;Acc:HGNC:52058]	unprocessed_pseudogene	0	9	0	3	0	0	0	5	0	0	0	0	0	0	0	0	8	4	4	6	0	38	0	0	6	10	0	8	0	0	0	0	0	0	0	0	0	0	0	0	0	0	0	0	3
ENSG00000229201	ENSG00000229201	LINC02787	long intergenic non-protein coding RNA 2787 [Source:HGNC Symbol;Acc:HGNC:54308]	lncRNA	0	0	0	3	1	12	0	4	0	9	0	0	0	0	0	0	0	1	0	10	0	0	0	0	0	4	0	7	0	16	0	0	0	6	45	0	0	1	8	0	0	0	0	9	3
ENSG00000181656	ENSG00000181656	GPR88	G protein-coupled receptor 88 [Source:HGNC Symbol;Acc:HGNC:4539]	protein_coding	4	17	0	0	0	2	4	16	4	22	0	13	2	2	32	3	3	12	4	4	91	17	55	25	2	9	7	2	9	77	13	4	13	7	229	12	2	3	97	1	2	439	62	14	23
ENSG00000122481	ENSG00000122481	RWDD3	RWD domain containing 3 [Source:HGNC Symbol;Acc:HGNC:21393]	protein_coding	182	242	46	74	215	132	323	127	87	144	93	244	214	167	112	209	63	137	88	115	169	192	406	305	24	218	68	160	230	280	97	74	71	373	221	294	177	351	184	122	856	310	0	5	52
ENSG00000198162	ENSG00000198162	MAN1A2	mannosidase alpha class 1A member 2 [Source:HGNC Symbol;Acc:HGNC:6822]	protein_coding	221	372	116	113	494	184	298	218	148	485	449	1420	219	348	196	235	77	337	79	186	706	526	563	386	41	391	165	272	537	643	271	189	94	502	44	81	117	129	294	348	3	147	6	46	146
ENSG00000238198	ENSG00000238198	LRIG2-DT	LRIG2 divergent transcript [Source:HGNC Symbol;Acc:HGNC:54312]	lncRNA	3	9	1	28	14	28	3	7	26	83	0	4	6	15	34	11	45	21	10	35	68	39	18	12	32	17	13	54	8	52	23	2	2	38	78	3	97	13	26	6	6	0	37	4	27
ENSG00000171517	ENSG00000171517	LPAR3	lysophosphatidic acid receptor 3 [Source:HGNC Symbol;Acc:HGNC:14298]	protein_coding	0	21	3	30	11	40	8	3	2	37	0	0	30	0	7	0	4	15	1	40	0	50	4	0	2	8	9	11	5	34	7	1	0	0	4	2	15	3	8	50	1	0	22	25	20
ENSG00000228852	ENSG00000228852		novel transcript, antisense to RWDD3	lncRNA	2	7	0	5	3	12	1	4	4	22	0	3	0	5	13	1	6	14	1	29	0	1	1	0	3	11	1	2	4	12	1	0	1	3	67	1	13	0	0	3	0	0	2	14	5
ENSG00000232878	ENSG00000232878	DPYD-AS1	DPYD antisense RNA 1 [Source:HGNC Symbol;Acc:HGNC:40195]	lncRNA	138	276	47	75	319	192	189	165	99	336	126	256	252	207	62	271	10	330	25	238	164	283	140	117	22	302	188	276	201	341	123	128	39	499	116	260	130	223	164	279	105	170	418	0	16
ENSG00000143079	ENSG00000143079	CTTNBP2NL	CTTNBP2 N-terminal like [Source:HGNC Symbol;Acc:HGNC:25330]	protein_coding	168	834	133	275	743	486	503	330	263	643	218	166	182	373	511	1301	162	377	210	292	820	465	612	373	80	334	210	158	782	294	221	118	146	375	1082	4	409	3	541	378	0	4	32	32	16
ENSG00000232450	ENSG00000232450		ribosomal protein S2 (RPS2) pseudogene	transcribed_processed_pseudogene	8	13	3	0	0	0	18	5	6	29	0	12	0	14	0	0	6	15	0	13	0	0	2	0	0	9	0	14	14	16	0	0	0	11	5	0	0	122	0	0	1	0	0	4	9
ENSG00000223575	ENSG00000223575	RBMX2P3	RBMX2 pseudogene 3 [Source:HGNC Symbol;Acc:HGNC:39925]	processed_pseudogene	0	25	2	3	1	4	2	4	3	14	0	0	0	1	2	0	2	4	0	15	18	6	1	0	2	2	13	3	2	0	2	9	0	0	0	0	1	1	9	0	0	0	1	20	1
ENSG00000230768	ENSG00000230768	LINC01676	long intergenic non-protein coding RNA 1676 [Source:HGNC Symbol;Acc:HGNC:52464]	lncRNA	0	0	1	6	3	2	2	13	3	0	0	0	1	2	4	0	1	0	0	28	4	0	13	11	16	9	10	11	1	9	9	2	1	1	53	0	1	19	12	0	0	0	0	22	3
ENSG00000235202	ENSG00000235202	LINC01525	long intergenic non-protein coding RNA 1525 [Source:HGNC Symbol;Acc:HGNC:51264]	lncRNA	0	3	5	0	0	3	0	6	1	0	0	0	0	0	15	0	0	9	0	6	0	0	0	0	1	0	1	18	7	6	0	0	1	0	0	2	0	0	0	0	0	0	0	2	3
ENSG00000235038	ENSG00000235038		novel transcript	lncRNA	0	6	0	3	4	2	0	1	5	4	0	0	1	3	0	1	0	7	0	16	11	4	6	1	1	1	3	7	2	8	2	0	0	11	2	0	0	0	0	0	0	0	4	0	6
ENSG00000143093	ENSG00000143093	STRIP1	striatin interacting protein 1 [Source:HGNC Symbol;Acc:HGNC:25916]	protein_coding	195	264	80	59	586	262	312	131	97	473	117	1132	216	43	298	298	38	583	99	239	213	318	674	150	33	415	211	322	837	368	124	135	142	400	192	534	361	11	179	147	3	109	172	41	58
ENSG00000226415	ENSG00000226415	TPI1P1	triosephosphate isomerase 1 pseudogene 1 [Source:HGNC Symbol;Acc:HGNC:35449]	processed_pseudogene	15	82	6	12	26	28	34	30	10	65	14	54	27	84	32	26	11	41	6	25	32	83	26	20	5	46	21	74	31	48	6	13	10	60	23	30	43	38	14	70	19	86	24	5	11
ENSG00000085491	ENSG00000085491	SLC25A24	solute carrier family 25 member 24 [Source:HGNC Symbol;Acc:HGNC:20662]	protein_coding	594	1732	271	494	1300	1201	1240	1224	480	1190	714	3115	1165	1216	503	2063	198	1902	212	895	1610	1978	927	753	50	1203	793	1227	1469	1671	312	525	365	2964	2	2729	468	911	553	1270	20	1901	65	26	24
ENSG00000173947	ENSG00000173947	PIFO	primary cilia formation [Source:HGNC Symbol;Acc:HGNC:27009]	protein_coding	5	26	19	23	21	5	9	15	12	102	0	2	8	0	18	0	17	46	5	87	29	174	27	20	11	10	11	28	26	25	7	11	6	0	56	9	3	3	40	93	2	0	8	6	56
ENSG00000241361	ENSG00000241361	SLC25A24P1	SLC25A24 pseudogene 1 [Source:HGNC Symbol;Acc:HGNC:48933]	transcribed_unprocessed_pseudogene	0	0	1	13	2	7	1	3	4	7	0	2	13	24	9	0	0	9	0	9	2	9	12	0	9	9	6	6	0	14	2	5	1	0	0	1	2	0	3	0	0	0	0	1	0
ENSG00000134198	ENSG00000134198	TSPAN2	tetraspanin 2 [Source:HGNC Symbol;Acc:HGNC:20659]	protein_coding	770	369	99	119	622	727	692	570	236	792	533	660	500	736	37	456	139	403	159	124	302	509	761	643	137	730	872	962	509	898	162	144	118	423	134	8	884	212	349	62	504	527	4709	24	254
ENSG00000235595	ENSG00000235595	GAPDHP23	glyceraldehyde 3 phosphate dehydrogenase pseudogene 23 [Source:HGNC Symbol;Acc:HGNC:37775]	processed_pseudogene	0	5	0	0	1	8	0	0	0	0	0	0	0	0	0	0	0	3	0	19	0	22	0	0	0	0	0	5	1	0	9	0	0	0	0	0	0	0	1	0	2	0	25	0	1
ENSG00000226053	ENSG00000226053	LINC01776	long intergenic non-protein coding RNA 1776 [Source:HGNC Symbol;Acc:HGNC:52566]	lncRNA	0	0	0	0	16	4	4	3	0	0	0	0	0	0	0	0	0	0	1	7	0	25	0	1	0	0	2	5	0	0	0	0	0	0	0	1	0	1	16	0	0	0	0	0	4
ENSG00000198799	ENSG00000198799	LRIG2	leucine rich repeats and immunoglobulin like domains 2 [Source:HGNC Symbol;Acc:HGNC:20889]	protein_coding	2	84	8	45	210	40	27	24	41	81	0	137	62	81	40	0	13	118	3	181	40	234	42	73	43	40	38	140	17	155	29	49	22	9	254	14	8	5	48	4	893	0	49	14	27
ENSG00000117620	ENSG00000117620	SLC35A3	solute carrier family 35 member A3 [Source:HGNC Symbol;Acc:HGNC:11023]	protein_coding	44	197	37	82	243	153	157	46	64	237	90	129	217	193	103	135	89	153	53	105	51	133	256	124	73	167	97	205	256	145	62	59	49	130	47	12	73	25	150	30	0	281	41	20	48
ENSG00000280186	ENSG00000280186		TEC	TEC	20	33	2	9	58	9	22	8	20	65	9	30	12	9	4	48	1	11	2	11	61	23	30	1	10	0	31	26	30	18	21	10	5	0	32	30	98	3	32	10	0	1	0	0	112
ENSG00000223906	ENSG00000223906		novel transcript	lncRNA	0	1	0	3	1	8	0	0	0	0	0	1	0	0	0	0	0	0	0	6	0	23	0	0	0	1	0	5	0	0	0	0	0	0	0	0	0	0	0	0	0	3	0	25	1
ENSG00000162688	ENSG00000162688	AGL	amylo-alpha-1, 6-glucosidase, 4-alpha-glucanotransferase [Source:HGNC Symbol;Acc:HGNC:321]	protein_coding	227	277	37	147	625	541	192	148	144	635	164	473	241	372	171	421	42	293	99	183	299	254	374	346	82	565	412	482	267	46	109	139	111	394	28	16	90	4	115	15	0	1	2	55	17
ENSG00000197106	ENSG00000197106	SLC6A17	solute carrier family 6 member 17 [Source:HGNC Symbol;Acc:HGNC:31399]	protein_coding	0	2	0	0	6	5	1	0	0	2	0	1	0	0	0	0	0	5	0	6	7	21	3	3	0	5	2	3	1	14	3	2	0	3	11	24	8	2	3	3	12	0	76	68	81
ENSG00000236137	ENSG00000236137	CD101-AS1	CD101 antisense RNA 1 [Source:HGNC Symbol;Acc:HGNC:55665]	lncRNA	0	11	0	0	35	25	0	2	6	24	21	27	16	2	1	11	0	26	4	10	10	9	7	1	9	18	5	8	0	15	3	10	7	4	2	2	0	0	1	1	6	0	0	0	7
ENSG00000203859	ENSG00000203859	HSD3B2	hydroxy-delta-5-steroid dehydrogenase, 3 beta- and steroid delta-isomerase 2 [Source:HGNC Symbol;Acc:HGNC:5218]	protein_coding	0	5	0	1	0	10	0	0	1	18	0	0	0	0	0	0	2	0	0	4	0	8	10	1	0	4	4	5	0	11	0	0	0	3	1	2	1	0	2	0	1	0	2	6	10
ENSG00000228086	ENSG00000228086		novel transcript	lncRNA	17	14	12	5	25	19	15	7	11	44	16	69	21	36	17	9	29	13	12	12	27	11	24	9	9	28	36	14	86	84	19	20	4	25	0	0	5	0	32	30	1	0	0	0	79
ENSG00000234020	ENSG00000234020	CHIAP3	chitinase, acidic pseudogene 3 [Source:HGNC Symbol;Acc:HGNC:44464]	unprocessed_pseudogene	0	6	0	5	5	0	0	2	0	0	0	0	0	0	14	0	0	3	1	10	0	0	6	3	0	0	0	0	0	1	0	0	0	1	0	1	0	0	1	24	1	0	0	8	1
ENSG00000060718	ENSG00000060718	COL11A1	collagen type XI alpha 1 chain [Source:HGNC Symbol;Acc:HGNC:2186]	protein_coding	13	30	5	32	64	27	6	6	11	46	1	0	2	4	21	8	7	36	1	132	6	16	6	2	6	27	9	49	4	6	41	5	2	9	32	11	3	4	7	0	3	2	1	31	26
ENSG00000236804	ENSG00000236804	RPS3AP12	RPS3A pseudogene 12 [Source:HGNC Symbol;Acc:HGNC:35527]	processed_pseudogene	0	5	1	4	5	7	2	12	1	1	0	0	0	1	10	0	2	16	1	27	3	3	13	1	11	2	3	12	8	10	1	0	0	10	13	1	6	29	0	0	0	0	0	11	0
ENSG00000185946	ENSG00000185946	RNPC3	RNA binding region (RNP1, RRM) containing 3 [Source:HGNC Symbol;Acc:HGNC:18666]	protein_coding	119	214	12	50	60	58	130	82	100	88	108	157	106	94	16	74	68	184	46	157	153	349	242	41	37	152	96	190	82	178	55	86	43	175	313	11	163	212	26	269	400	217	10	16	21
ENSG00000162627	ENSG00000162627	SNX7	sorting nexin 7 [Source:HGNC Symbol;Acc:HGNC:14971]	protein_coding	263	223	112	70	797	55	425	111	89	156	141	176	451	126	293	55	241	115	197	50	482	308	654	25	52	145	114	84	1549	146	192	59	174	205	307	1	173	149	712	147	1681	0	2259	24	220
ENSG00000226715	ENSG00000226715	LINC01709	long intergenic non-protein coding RNA 1709 [Source:HGNC Symbol;Acc:HGNC:52497]	lncRNA	1	9	4	25	5	26	6	7	2	64	3	12	1	2	17	11	3	21	6	27	10	43	4	26	23	23	10	16	3	8	13	7	1	17	7	4	4	3	31	3	0	0	0	24	7
ENSG00000162695	ENSG00000162695	SLC30A7	solute carrier family 30 member 7 [Source:HGNC Symbol;Acc:HGNC:19306]	protein_coding	120	311	63	111	278	261	183	160	155	281	213	917	109	215	101	178	114	197	23	216	277	231	353	234	67	178	99	251	458	433	105	100	60	168	175	43	150	5	183	216	222	30	9	28	14
ENSG00000134184	ENSG00000134184	GSTM1	glutathione S-transferase mu 1 [Source:HGNC Symbol;Acc:HGNC:4632]	protein_coding	0	3	23	0	520	326	42	0	214	1006	322	1467	98	5	129	0	0	1	34	6	4	8	887	388	3	0	20	3	0	22	366	200	167	527	419	807	0	0	1277	1785	432	1	0	25	335
ENSG00000265808	ENSG00000265808	SEC22B	SEC22 homolog B, vesicle trafficking protein [Source:HGNC Symbol;Acc:HGNC:10700]	protein_coding	1370	2436	562	570	3075	1441	2027	1061	702	2099	1090	3831	1689	1497	997	1258	716	2658	544	1234	2118	1993	2474	1628	270	2439	1378	2424	3083	2763	1439	1712	588	3177	683	954	1144	344	1367	1264	1204	1488	1695	1812	389
ENSG00000134247	ENSG00000134247	PTGFRN	prostaglandin F2 receptor inhibitor [Source:HGNC Symbol;Acc:HGNC:9601]	protein_coding	7	13	21	19	16	24	3	31	4	74	0	0	54	2	47	2	3	33	0	48	177	75	217	0	4	21	36	30	399	14	23	3	4	9	39	8	8	21	148	3	8	1	17	83	399
ENSG00000116752	ENSG00000116752	BCAS2	BCAS2 pre-mRNA processing factor [Source:HGNC Symbol;Acc:HGNC:975]	protein_coding	550	885	301	215	825	497	1099	481	363	783	509	2191	686	1192	538	416	208	936	257	378	787	669	1079	744	72	835	456	609	1584	986	548	461	312	1504	409	564	689	1491	919	688	248	2135	1971	1398	506
ENSG00000162664	ENSG00000162664	ZNF326	zinc finger protein 326 [Source:HGNC Symbol;Acc:HGNC:14104]	protein_coding	161	695	106	278	599	309	201	458	182	541	175	910	443	326	195	608	119	516	92	313	550	769	333	308	114	396	110	305	455	484	206	214	97	583	400	270	194	511	286	280	150	353	5	75	52
ENSG00000134253	ENSG00000134253	TRIM45	tripartite motif containing 45 [Source:HGNC Symbol;Acc:HGNC:19018]	protein_coding	0	62	3	16	9	70	4	6	8	233	0	7	9	0	62	34	13	24	5	50	39	97	32	52	16	57	50	32	25	68	33	5	3	16	55	2	8	283	63	9	1	6	112	48	19
ENSG00000223416	ENSG00000223416	RPS26P15	ribosomal protein S26 pseudogene 15 [Source:HGNC Symbol;Acc:HGNC:35680]	processed_pseudogene	1	20	0	5	66	21	0	9	0	11	0	4	0	0	1	0	2	38	0	5	4	9	4	8	1	9	8	13	1	4	4	0	2	5	5	0	0	0	4	0	4	0	0	1	0
ENSG00000213226	ENSG00000213226		prostaglandin reductase 1 (PTGR1) pseudogene	processed_pseudogene	0	5	0	0	0	15	0	1	3	3	0	0	0	0	5	0	6	14	0	11	0	2	0	2	1	15	0	1	0	0	0	0	0	8	11	0	0	0	1	0	0	0	0	2	4
ENSG00000179571	ENSG00000179571	NBPF17P	NBPF member 17, pseudogene [Source:HGNC Symbol;Acc:HGNC:31997]	unprocessed_pseudogene	0	4	0	18	24	13	0	12	0	4	0	0	0	0	6	0	2	6	2	12	6	15	4	3	0	1	11	12	25	4	1	0	0	0	2	6	2	0	12	17	2	0	28	63	28
ENSG00000260246	ENSG00000260246		novel transcript, antisense to GSTM1	lncRNA	0	3	16	0	378	175	32	0	161	725	229	1074	72	4	78	0	0	1	15	0	4	0	643	281	1	0	14	1	0	0	260	145	121	369	248	460	0	0	795	953	218	1	0	0	148
ENSG00000173218	ENSG00000173218	VANGL1	VANGL planar cell polarity protein 1 [Source:HGNC Symbol;Acc:HGNC:15512]	protein_coding	28	122	4	67	8	90	33	84	17	24	94	0	52	158	33	2	2	195	35	71	42	59	182	74	0	216	43	99	380	266	50	5	60	57	12	9	66	7	21	51	7	410	12	60	65
ENSG00000285532	ENSG00000285532	LINC02788	long intergenic non-protein coding RNA 2788 [Source:HGNC Symbol;Acc:HGNC:54309]	lncRNA	0	2	0	7	0	2	0	2	0	6	0	0	0	0	1	1	0	8	0	12	1	13	5	2	0	8	0	12	8	10	7	0	0	14	7	0	0	0	0	1	2	0	0	5	6
ENSG00000232650	ENSG00000232650	LINC01780	long intergenic non-protein coding RNA 1780 [Source:HGNC Symbol;Acc:HGNC:52570]	lncRNA	0	7	0	26	3	16	2	3	2	4	0	0	0	1	46	11	0	10	3	14	9	17	0	3	7	19	1	12	25	50	6	7	0	6	45	4	1	0	24	0	0	0	0	82	6
ENSG00000183508	ENSG00000183508	TENT5C	terminal nucleotidyltransferase 5C [Source:HGNC Symbol;Acc:HGNC:24712]	protein_coding	496	2277	254	464	2846	1935	1188	1370	1556	1455	1404	7581	3402	1600	1047	840	875	6077	539	3791	1676	1787	19186	18740	1946	7073	980	2036	2844	6292	604	2184	650	1970	1780	2289	1757	2680	1245	673	1056	13	32	38	273
ENSG00000234283	ENSG00000234283	LINC01731	long intergenic non-protein coding RNA 1731 [Source:HGNC Symbol;Acc:HGNC:52519]	lncRNA	0	0	0	12	4	3	0	0	0	9	0	1	0	1	0	0	0	12	0	0	0	4	0	0	0	0	0	1	9	0	0	1	0	3	0	2	0	7	15	0	0	0	0	0	6
ENSG00000237188	ENSG00000237188		novel transcript, antisense to FMO5	lncRNA	309	1182	154	325	740	861	338	504	260	952	452	2077	766	990	315	786	259	1004	251	452	482	1116	843	838	189	1183	796	1114	1450	1661	448	273	263	871	350	39	572	4	926	657	343	714	1522	12	96
ENSG00000198765	ENSG00000198765	SYCP1	synaptonemal complex protein 1 [Source:HGNC Symbol;Acc:HGNC:11487]	protein_coding	10	12	3	10	34	4	2	1	6	16	0	0	0	0	22	0	1	3	3	33	4	52	2	5	7	28	6	18	9	4	1	3	0	0	0	0	0	2	9	5	0	0	0	24	71
ENSG00000277702	ENSG00000277702		lymphocyte-specific protein 1 (LSP1) pseudogene	unprocessed_pseudogene	9	21	12	8	38	8	22	4	2	6	8	16	9	1	16	2	7	24	5	8	23	20	22	8	1	10	8	16	65	9	7	6	8	12	16	4	23	11	30	15	1	0	0	0	120
ENSG00000143398	ENSG00000143398	PIP5K1A	phosphatidylinositol-4-phosphate 5-kinase type 1 alpha [Source:HGNC Symbol;Acc:HGNC:8994]	protein_coding	174	556	104	99	374	358	268	196	96	253	293	868	517	484	256	301	123	466	95	318	258	495	312	192	78	459	210	290	1232	485	125	294	127	890	36	1574	224	4	209	249	18	305	28	70	21
ENSG00000196505	ENSG00000196505	GDAP2	ganglioside induced differentiation associated protein 2 [Source:HGNC Symbol;Acc:HGNC:18010]	protein_coding	416	837	72	287	659	573	551	487	333	572	194	1278	275	649	251	673	57	557	118	352	219	635	200	543	80	431	421	711	538	945	230	389	184	796	70	546	255	4	412	504	1	3	43	21	347
ENSG00000225871	ENSG00000225871		family with sequence similarity 91, member A1 (FAM91A1) pseudogene	processed_pseudogene	39	60	14	17	77	26	55	13	41	52	7	102	9	45	10	56	14	31	22	21	45	27	39	33	0	79	12	44	37	60	10	26	18	55	0	0	56	0	7	84	0	46	0	28	2
ENSG00000223489	ENSG00000223489	NEFHP1	neurofilament heavy pseudogene 1 [Source:HGNC Symbol;Acc:HGNC:7738]	processed_pseudogene	0	63	0	1	6	14	7	1	3	1	0	7	0	0	10	2	3	1	0	19	0	116	10	5	3	4	18	23	2	68	9	3	1	2	16	4	3	5	0	118	0	1	35	5	15
ENSG00000241720	ENSG00000241720		novel transcript	lncRNA	178	670	108	85	942	248	507	211	83	307	120	388	653	360	415	323	101	631	120	217	416	108	792	852	48	454	128	146	857	594	395	72	132	164	317	440	390	826	872	884	1569	230	9876	1207	599
ENSG00000235526	ENSG00000235526		novel transcript	lncRNA	5	0	0	0	0	0	0	3	0	24	0	0	0	0	11	8	0	2	0	0	0	5	0	4	6	0	0	0	12	0	0	0	1	0	0	2	0	2	1	0	0	0	50	0	5
ENSG00000276975	ENSG00000276975	HYDIN2	HYDIN axonemal central pair apparatus protein 2 (pseudogene) [Source:HGNC Symbol;Acc:HGNC:33129]	transcribed_unprocessed_pseudogene	2	58	5	25	71	97	5	20	6	50	0	10	2	14	90	7	17	39	4	113	18	131	10	21	15	50	22	49	41	61	13	2	1	5	112	23	45	7	21	80	6	4	189	582	67
ENSG00000236012	ENSG00000236012	HIGD1AP12	HIG1 hypoxia inducible domain family member 1A pseudogene 12 [Source:HGNC Symbol;Acc:HGNC:43007]	processed_pseudogene	0	2	0	7	1	7	0	0	0	8	0	10	3	0	21	4	8	0	0	5	4	30	0	3	7	0	1	4	0	0	0	0	0	11	6	0	1	0	3	28	0	0	0	2	0
ENSG00000134200	ENSG00000134200	TSHB	thyroid stimulating hormone subunit beta [Source:HGNC Symbol;Acc:HGNC:12372]	protein_coding	0	13	2	7	0	15	0	1	3	0	0	0	0	5	3	0	0	13	0	19	0	31	4	13	4	5	0	3	5	30	0	2	0	8	22	1	0	0	29	0	0	0	0	0	1
ENSG00000065183	ENSG00000065183	WDR3	WD repeat domain 3 [Source:HGNC Symbol;Acc:HGNC:12755]	protein_coding	285	814	99	152	338	662	288	296	149	382	152	1136	405	420	257	224	50	785	154	397	440	218	290	403	78	311	202	386	1126	414	186	150	174	882	377	871	358	12	253	504	0	801	33	24	58
ENSG00000227082	ENSG00000227082	LINC02798	long intergenic non-protein coding RNA 2798 [Source:HGNC Symbol;Acc:HGNC:54323]	lncRNA	2	18	3	6	19	15	0	2	20	15	3	3	0	1	30	5	0	11	1	22	9	18	46	8	12	14	11	8	2	5	6	5	1	0	59	5	7	6	30	4	3	0	14	49	20
ENSG00000226126	ENSG00000226126	PSMC1P12	proteasome 26S subunit, ATPase 1 pseudogene 12 [Source:HGNC Symbol;Acc:HGNC:39787]	processed_pseudogene	3	3	0	0	5	5	0	1	1	0	0	0	0	0	7	3	0	20	0	2	0	65	0	6	4	1	6	4	8	9	4	0	3	3	12	1	0	1	0	0	0	0	0	7	10
ENSG00000163393	ENSG00000163393	SLC22A15	solute carrier family 22 member 15 [Source:HGNC Symbol;Acc:HGNC:20301]	protein_coding	137	327	31	80	528	148	359	205	190	440	60	204	241	217	2	184	111	109	95	55	12	390	117	159	35	265	225	304	215	354	172	61	36	493	19	5	268	374	83	0	0	660	2	17	246
ENSG00000163156	ENSG00000163156	SCNM1	sodium channel modifier 1 [Source:HGNC Symbol;Acc:HGNC:23136]	protein_coding	634	990	180	224	975	681	866	410	286	942	496	1110	559	599	338	719	216	859	168	282	579	853	734	552	86	736	446	743	826	1093	341	371	267	1647	761	1015	1096	1221	554	1474	2042	2912	4952	727	654
ENSG00000143631	ENSG00000143631	FLG	filaggrin [Source:HGNC Symbol;Acc:HGNC:3748]	protein_coding	1	22	1	4	5	39	3	7	0	19	0	0	1	3	6	4	0	0	0	52	76	11	3	1	0	4	1	2	13	2	7	5	1	4	18	17	8	90	8	4	10	0	4	61	43
ENSG00000177551	ENSG00000177551	NHLH2	nescient helix-loop-helix 2 [Source:HGNC Symbol;Acc:HGNC:7818]	protein_coding	0	14	2	16	8	54	4	10	8	43	0	1	8	0	27	0	3	29	2	48	7	31	5	2	14	6	9	9	18	0	3	1	7	4	5	16	2	3	12	3	2	0	17	74	20
ENSG00000197323	ENSG00000197323	TRIM33	tripartite motif containing 33 [Source:HGNC Symbol;Acc:HGNC:16290]	protein_coding	444	939	241	264	1008	667	619	433	308	1115	402	2099	552	377	211	376	130	1171	188	426	605	603	803	712	128	1077	532	532	784	1186	256	262	185	714	498	5	423	255	550	385	3	23	0	35	30
ENSG00000237975	ENSG00000237975	FLG-AS1	FLG antisense RNA 1 [Source:HGNC Symbol;Acc:HGNC:27913]	lncRNA	2	26	0	17	27	80	4	16	6	76	0	7	5	3	26	4	9	76	3	136	27	127	67	20	21	17	23	21	18	47	2	8	4	12	128	26	41	85	34	11	6	1	44	91	19
ENSG00000287980	ENSG00000287980		novel transcript	lncRNA	2	11	2	10	3	16	1	3	7	16	0	11	0	0	29	6	5	3	1	30	9	55	6	8	4	13	6	11	2	1	5	0	0	7	5	5	0	7	5	10	0	0	0	0	3
ENSG00000271419	ENSG00000271419		trafficking protein, kinesin binding 2 (TRAK2) pseudogene	processed_pseudogene	0	0	0	6	0	0	0	1	0	0	0	0	0	0	0	0	1	5	0	18	0	2	0	0	0	0	0	16	0	12	0	4	0	0	1	1	0	0	0	0	0	0	0	5	6
ENSG00000079335	ENSG00000079335	CDC14A	cell division cycle 14A [Source:HGNC Symbol;Acc:HGNC:1718]	protein_coding	39	118	36	28	220	129	98	92	97	154	111	448	131	214	73	62	111	107	50	152	41	151	218	68	17	220	172	126	509	342	192	74	15	98	44	8	69	0	157	187	2	2	475	43	467
ENSG00000143119	ENSG00000143119	CD53	CD53 molecule [Source:HGNC Symbol;Acc:HGNC:1686]	protein_coding	3609	1803	1676	1266	3031	2261	4961	1534	1631	1964	2827	8969	3122	2733	819	2173	1209	3066	1388	1876	1862	3002	1730	1394	294	3074	1585	1509	4451	4558	1479	1769	1239	6737	2201	2785	3781	1497	1700	4069	1653	3010	67	32	898
ENSG00000285062	ENSG00000285062		poly(ADP-ribose) polymerase family member 8 (PARP8) pseudogene	transcribed_unprocessed_pseudogene	25	19	7	2	41	11	19	6	23	19	16	50	9	21	6	11	6	15	10	8	20	11	12	9	1	25	8	34	11	21	6	12	15	43	0	0	20	1	1	30	0	24	0	1	6
ENSG00000143520	ENSG00000143520	FLG2	filaggrin 2 [Source:HGNC Symbol;Acc:HGNC:33276]	protein_coding	5	14	6	23	3	12	5	38	2	3	0	16	2	5	43	3	7	5	0	82	8	2	9	0	9	9	5	21	9	1	11	4	0	3	9	8	4	6	5	1	1	0	39	100	55
ENSG00000171943	ENSG00000171943	SRGAP2C	SLIT-ROBO Rho GTPase activating protein 2C [Source:HGNC Symbol;Acc:HGNC:30584]	protein_coding	203	240	80	82	447	125	258	91	119	107	190	96	265	107	101	94	122	161	118	94	280	263	307	164	18	169	136	124	347	197	156	73	110	198	3	69	407	185	215	139	290	1	24	30	43
ENSG00000155761	ENSG00000155761	SPAG17	sperm associated antigen 17 [Source:HGNC Symbol;Acc:HGNC:26620]	protein_coding	23	114	6	63	59	85	30	23	18	69	22	91	31	32	53	41	15	62	12	169	52	111	45	33	21	76	55	63	99	53	30	16	24	56	40	69	57	2	49	62	0	101	48	24	28
ENSG00000230806	ENSG00000230806	SRGAP2-AS1	SRGAP2 antisense RNA 1 [Source:HGNC Symbol;Acc:HGNC:40902]	lncRNA	0	8	0	0	0	11	1	0	0	0	0	0	0	0	0	0	0	7	0	15	0	0	3	2	1	9	0	8	1	0	2	0	1	0	2	0	0	0	1	7	0	0	0	0	8
ENSG00000116830	ENSG00000116830	TTF2	transcription termination factor 2 [Source:HGNC Symbol;Acc:HGNC:12398]	protein_coding	35	188	8	111	229	290	18	62	40	377	91	345	81	207	115	95	38	511	32	134	116	140	51	268	23	180	269	262	107	503	29	122	23	181	102	558	178	2	18	233	0	1	58	2116	67
ENSG00000143614	ENSG00000143614	GATAD2B	GATA zinc finger domain containing 2B [Source:HGNC Symbol;Acc:HGNC:30778]	protein_coding	43	174	13	30	80	98	88	99	70	145	47	251	72	96	40	131	29	174	57	94	41	135	126	88	21	191	65	139	63	192	54	70	15	209	126	22	100	14	81	35	4	0	72	34	52
ENSG00000169418	ENSG00000169418	NPR1	natriuretic peptide receptor 1 [Source:HGNC Symbol;Acc:HGNC:7943]	protein_coding	194	64	74	42	314	86	416	60	59	180	86	61	178	3	33	13	16	61	38	36	620	204	350	65	60	103	100	122	377	21	126	38	141	250	120	12	257	8	19	42	4	9	97	212	161
ENSG00000081026	ENSG00000081026	MAGI3	membrane associated guanylate kinase, WW and PDZ domain containing 3 [Source:HGNC Symbol;Acc:HGNC:29647]	protein_coding	74	235	33	48	202	36	92	63	33	198	133	166	123	64	52	1	24	87	62	182	129	90	118	6	54	106	45	53	58	32	73	24	38	115	39	8	106	4	11	0	1	1	7	77	185
ENSG00000225650	ENSG00000225650	EIF2S2P5	eukaryotic translation initiation factor 2 subunit 2 beta pseudogene 5 [Source:HGNC Symbol;Acc:HGNC:37793]	processed_pseudogene	0	13	0	3	28	2	0	3	2	10	0	1	0	5	6	6	7	0	4	7	1	11	5	7	10	0	6	7	6	0	5	1	0	1	0	1	0	1	1	0	3	0	1	1	3
ENSG00000227179	ENSG00000227179	PGBP	pepsinogen B, pseudogene [Source:HGNC Symbol;Acc:HGNC:39503]	transcribed_unprocessed_pseudogene	0	8	0	1	7	20	0	9	1	54	0	0	0	0	0	1	0	0	3	14	0	40	16	1	5	4	2	8	0	5	4	2	0	0	6	4	1	1	72	2	3	0	12	13	10
ENSG00000224965	ENSG00000224965	KCNC4-DT	KCNC4 divergent transcript [Source:HGNC Symbol;Acc:HGNC:39958]	lncRNA	1	0	0	2	22	0	22	2	0	12	39	0	0	0	5	0	11	0	2	2	0	0	62	6	1	13	7	0	0	0	1	3	4	2	0	4	1	1	1	4	0	5	9	0	3
ENSG00000228127	ENSG00000228127	LINC01649	long intergenic non-protein coding RNA 1649 [Source:HGNC Symbol;Acc:HGNC:52436]	lncRNA	0	2	0	13	2	11	0	12	0	28	0	0	0	0	25	0	1	12	0	9	0	26	10	11	3	7	2	0	0	15	0	5	0	1	0	3	0	0	0	2	4	0	3	36	4
ENSG00000143554	ENSG00000143554	SLC27A3	solute carrier family 27 member 3 [Source:HGNC Symbol;Acc:HGNC:10997]	protein_coding	156	92	63	23	23	105	449	61	75	51	52	237	63	47	2	3	41	20	60	37	149	97	322	105	5	80	95	66	250	206	103	32	197	165	13	20	126	3	114	103	658	0	553	36	375
ENSG00000143458	ENSG00000143458	GABPB2	GA binding protein transcription factor subunit beta 2 [Source:HGNC Symbol;Acc:HGNC:28441]	protein_coding	77	149	19	72	110	133	134	66	60	248	12	145	105	56	249	152	59	92	42	103	161	211	215	91	61	154	147	150	269	143	114	51	71	102	179	146	92	102	68	6	1052	0	55	50	142
ENSG00000230932	ENSG00000230932		tight junction protein 3 (zona occludens 3) (TJP3) pseudogene	processed_pseudogene	0	6	0	6	9	4	7	1	2	5	0	13	0	15	9	1	3	9	3	5	5	11	0	0	10	15	13	1	20	31	3	0	0	0	0	0	5	0	9	0	0	0	0	0	5
ENSG00000073754	ENSG00000073754	CD5L	CD5 molecule like [Source:HGNC Symbol;Acc:HGNC:1690]	protein_coding	627	283	378	385	1002	210	264	100	123	124	213	419	62	1260	32	110	65	66	71	34	1340	757	273	130	49	225	199	42	167	259	170	16	125	499	1179	1462	4	365	90	5651	1023	92	4772	1	189
ENSG00000228826	ENSG00000228826		novel transcript	lncRNA	0	5	0	1	5	5	0	1	0	9	0	0	0	0	10	0	0	5	1	7	0	0	0	0	1	6	1	12	2	11	1	0	0	3	0	6	0	0	1	0	3	0	0	19	7
ENSG00000233907	ENSG00000233907	LINC01761	long intergenic non-protein coding RNA 1761 [Source:HGNC Symbol;Acc:HGNC:52551]	lncRNA	0	3	0	0	3	0	0	0	0	0	0	0	0	0	8	1	0	1	0	3	0	0	0	0	0	0	0	1	2	0	1	0	0	3	4	6	2	0	1	45	0	0	0	0	12
ENSG00000280649	ENSG00000280649		TEC	TEC	44	27	9	7	64	13	29	7	38	24	22	63	14	31	4	17	9	18	20	11	23	9	20	31	1	42	9	48	13	31	10	19	16	66	0	0	26	0	2	41	3	27	0	1	45
ENSG00000131781	ENSG00000131781	FMO5	flavin containing dimethylaniline monoxygenase 5 [Source:HGNC Symbol;Acc:HGNC:3773]	protein_coding	96	132	4	78	286	137	80	96	54	142	50	333	98	258	122	172	151	98	19	115	106	191	193	164	28	269	96	151	289	197	85	43	25	57	468	485	189	8	189	55	0	272	47	19	26
ENSG00000286151	ENSG00000286151		SLAM family member 5-like pseudogene	unprocessed_pseudogene	0	5	0	3	1	3	0	0	0	0	0	0	0	0	2	0	2	14	0	0	0	3	1	4	0	3	0	8	1	0	0	0	0	2	3	1	7	0	0	1	0	1	27	28	2
ENSG00000271736	ENSG00000271736	LINC02772	long intergenic non-protein coding RNA 2772 [Source:HGNC Symbol;Acc:HGNC:54292]	lncRNA	39	249	7	74	191	197	68	91	31	55	59	141	114	29	93	164	36	301	24	307	65	196	169	178	34	257	15	127	65	303	52	87	68	188	47	60	158	180	19	65	391	0	10	2	11
ENSG00000233717	ENSG00000233717	RPS29P29	ribosomal protein S29 pseudogene 29 [Source:HGNC Symbol;Acc:HGNC:52362]	processed_pseudogene	0	1	0	0	0	0	1	1	0	4	0	1	0	0	1	0	3	4	1	0	0	5	6	1	5	0	0	0	0	7	9	0	0	0	0	0	0	0	1	0	0	0	0	0	0
ENSG00000231551	ENSG00000231551	PDE4DIPP6	PDE4DIP pseudogene 6 [Source:HGNC Symbol;Acc:HGNC:55097]	transcribed_unprocessed_pseudogene	45	29	5	9	5	80	50	28	9	71	22	113	15	6	2	1	2	45	4	42	58	53	19	25	18	57	25	28	8	40	18	7	35	53	2	159	44	5	2	3	7	1	19	16	14
ENSG00000227295	ENSG00000227295	ELL2P1	elongation factor for RNA polymerase II 2 pseudogene 1 [Source:HGNC Symbol;Acc:HGNC:39343]	processed_pseudogene	2	0	2	1	1	0	14	6	0	0	0	2	3	17	0	20	0	2	0	1	0	16	3	20	10	0	4	6	2	4	0	1	0	1	1	1	53	3	0	3	1	0	0	10	2
ENSG00000163155	ENSG00000163155	LYSMD1	LysM domain containing 1 [Source:HGNC Symbol;Acc:HGNC:32070]	protein_coding	9	15	0	21	36	15	21	8	4	21	0	42	26	7	6	2	13	5	1	33	11	31	17	9	2	20	15	32	26	7	10	15	5	40	47	12	4	5	7	1	6	8	4	78	42
ENSG00000243613	ENSG00000243613		novel transcript	lncRNA	31	8	4	6	74	21	28	18	17	33	43	68	23	20	24	9	7	56	3	28	7	2	44	13	0	45	40	27	74	34	10	23	19	7	0	0	29	0	37	8	2	0	0	0	0
ENSG00000143552	ENSG00000143552	NUP210L	nucleoporin 210 like [Source:HGNC Symbol;Acc:HGNC:29915]	protein_coding	7	88	8	16	86	42	3	18	57	42	1	9	10	16	67	18	16	57	6	77	29	204	50	65	30	74	28	57	131	76	40	17	2	20	35	38	38	307	59	14	0	1	44	72	38
ENSG00000175984	ENSG00000175984	DENND2C	DENN domain containing 2C [Source:HGNC Symbol;Acc:HGNC:24748]	protein_coding	35	130	16	48	264	148	15	118	40	269	15	33	7	58	102	21	20	77	21	110	239	238	61	114	79	135	51	284	220	146	43	48	6	32	87	52	28	5	141	9	3	634	78	71	37
ENSG00000116824	ENSG00000116824	CD2	CD2 molecule [Source:HGNC Symbol;Acc:HGNC:1639]	protein_coding	24	11	7	34	76	68	50	34	46	67	286	2113	111	348	15	1	30	97	51	143	66	82	36	55	7	91	57	162	80	416	20	110	32	202	329	63	3	11	42	44	0	333	1852	1435	81
ENSG00000223804	ENSG00000223804		Poly [ADP-ribose] polymerase 8 (PARP8) pseudogene	transcribed_unprocessed_pseudogene	33	22	17	20	112	25	127	26	13	36	33	99	94	50	14	28	55	80	21	21	96	52	120	107	4	60	49	52	162	88	53	35	26	118	99	23	67	29	128	81	54	79	0	0	274
ENSG00000024526	ENSG00000024526	DEPDC1	DEP domain containing 1 [Source:HGNC Symbol;Acc:HGNC:22949]	protein_coding	36	588	0	53	125	292	26	294	66	479	244	345	97	241	168	543	47	713	4	216	19	413	215	748	53	704	213	502	181	838	11	114	12	337	187	9	3	102	39	139	0	222	2444	5	10
ENSG00000236480	ENSG00000236480	PKMP1	pyruvate kinase M1/2 pseudogene 1 [Source:HGNC Symbol;Acc:HGNC:44243]	processed_pseudogene	0	14	1	1	34	31	0	4	1	6	1	0	0	2	1	0	3	24	3	1	16	80	19	24	8	16	3	5	11	76	4	0	0	2	2	0	0	0	0	0	0	2	7	23	6
ENSG00000238107	ENSG00000238107	LINC02806	long intergenic non-protein coding RNA 2806 [Source:HGNC Symbol;Acc:HGNC:27628]	lncRNA	0	0	0	0	0	0	0	0	0	0	23	0	0	0	0	0	0	0	0	7	0	1	0	2	0	10	0	1	0	12	0	0	0	11	2	7	0	0	0	35	0	0	0	20	9
ENSG00000227425	ENSG00000227425	MRPS21P2	mitochondrial ribosomal protein S21 pseudogene 2 [Source:HGNC Symbol;Acc:HGNC:29749]	processed_pseudogene	0	7	0	9	1	8	3	0	2	0	0	0	0	0	0	0	0	3	0	15	0	11	0	0	0	14	1	10	0	5	4	0	0	0	0	1	0	0	0	0	0	0	0	0	0
ENSG00000233222	ENSG00000233222		novel transcript	lncRNA	17	7	0	3	42	13	12	13	14	32	26	45	16	17	11	6	2	30	4	18	5	2	36	12	0	31	30	18	40	20	10	17	10	7	0	0	14	0	14	8	0	0	0	0	0
ENSG00000225279	ENSG00000225279		novel transcript	lncRNA	4	0	8	0	1	0	5	0	0	0	0	0	0	0	0	0	0	25	0	21	0	1	9	26	0	1	0	1	118	0	0	0	1	0	0	1	0	2	1	0	7	0	3	12	5
ENSG00000224927	ENSG00000224927	NDUFA5P10	NADH:ubiquinone oxidoreductase subunit A5 pseudogene 10 [Source:HGNC Symbol;Acc:HGNC:48852]	processed_pseudogene	0	11	0	2	0	15	6	3	0	12	0	3	0	2	1	0	3	6	0	6	0	9	8	24	6	4	0	5	0	15	7	0	0	1	0	0	1	0	4	0	0	0	0	12	1
ENSG00000117262	ENSG00000117262	GPR89A	G protein-coupled receptor 89A [Source:HGNC Symbol;Acc:HGNC:31984]	protein_coding	15	45	9	12	17	36	19	39	9	59	25	74	20	33	29	22	8	66	8	26	38	57	29	30	11	46	32	20	10	42	14	10	14	79	30	12	13	1	27	42	259	0	0	1	11
ENSG00000143624	ENSG00000143624	INTS3	integrator complex subunit 3 [Source:HGNC Symbol;Acc:HGNC:26153]	protein_coding	309	149	90	53	476	164	321	152	182	308	192	617	195	170	208	174	93	522	51	177	165	285	395	199	37	305	274	169	619	387	164	190	186	143	137	317	405	35	301	240	14	2	191	78	86
ENSG00000261055	ENSG00000261055		novel transcript	lncRNA	3	5	0	2	1	0	4	2	0	0	1	0	0	0	0	1	0	0	1	1	20	5	0	0	0	2	3	0	16	0	0	12	6	4	54	0	0	0	0	2	3	0	18	4	3
ENSG00000231613	ENSG00000231613		novel transcript	lncRNA	0	4	0	7	14	8	6	0	0	0	0	0	0	0	19	0	0	7	3	7	1	18	0	0	0	0	0	1	0	0	6	1	2	0	0	0	0	0	0	0	0	0	0	0	0
ENSG00000137947	ENSG00000137947	GTF2B	general transcription factor IIB [Source:HGNC Symbol;Acc:HGNC:4648]	protein_coding	740	910	249	194	907	574	1165	468	346	661	476	1306	773	760	354	577	205	1159	192	691	840	994	866	980	72	998	429	896	1106	1463	409	529	317	1484	316	291	672	859	416	630	0	1010	3471	26	264
ENSG00000233589	ENSG00000233589		novel transcript	lncRNA	7	159	0	22	19	83	13	80	23	134	56	96	36	73	45	166	7	226	0	85	31	137	77	204	11	215	52	154	64	253	4	33	2	110	50	3	0	26	15	58	0	95	925	0	1
ENSG00000117586	ENSG00000117586	TNFSF4	TNF superfamily member 4 [Source:HGNC Symbol;Acc:HGNC:11934]	protein_coding	66	142	61	330	447	240	76	104	119	779	26	294	44	140	130	975	74	220	105	106	396	359	327	563	67	341	123	395	191	494	10	150	155	556	0	1	62	131	283	91	0	303	1	151	85
ENSG00000162728	ENSG00000162728	KCNJ9	potassium inwardly rectifying channel subfamily J member 9 [Source:HGNC Symbol;Acc:HGNC:6270]	protein_coding	2	2	1	1	1	1	0	0	0	0	0	0	0	1	6	5	2	0	0	0	1	13	1	2	0	3	1	5	1	0	0	0	0	0	17	3	6	4	4	2	0	2	8	72	29
ENSG00000229021	ENSG00000229021		novel transcript	lncRNA	0	12	0	6	14	21	1	10	4	16	0	2	0	3	17	5	8	14	0	16	3	64	7	9	6	14	9	12	5	31	5	1	2	10	57	111	4	17	4	4	1	0	19	35	29
ENSG00000203825	ENSG00000203825		phosphodiesterase 4D interacting protein (myomegalin) (PDE4DIP) pseudogene	unprocessed_pseudogene	5	4	0	1	2	8	0	8	0	0	0	0	0	1	13	0	0	26	1	16	0	20	0	6	0	0	0	13	2	17	0	0	0	0	4	10	5	4	6	0	2	0	14	0	44
ENSG00000184371	ENSG00000184371	CSF1	colony stimulating factor 1 [Source:HGNC Symbol;Acc:HGNC:2432]	protein_coding	45	47	21	26	241	3	46	19	24	52	65	91	242	55	26	89	24	92	13	56	74	10	68	56	14	28	24	43	234	26	98	69	24	128	130	24	140	4	95	94	21	6	40	114	115
ENSG00000233203	ENSG00000233203	DHCR24-DT	DHCR24 divergent transcript [Source:HGNC Symbol;Acc:HGNC:53969]	lncRNA	0	8	3	4	0	2	2	2	4	32	0	0	0	10	2	0	0	9	2	18	2	9	36	0	6	1	0	0	2	5	1	0	3	0	9	0	0	1	0	3	0	0	0	11	3
ENSG00000232265	ENSG00000232265	LINC02805	long intergenic non-protein coding RNA 2805 [Source:HGNC Symbol;Acc:HGNC:54339]	lncRNA	6	11	1	12	11	11	8	12	12	72	0	1	1	10	46	8	7	13	4	14	8	20	31	42	28	45	10	15	12	32	6	4	0	6	4	11	3	8	42	139	228	0	7	33	21
ENSG00000163154	ENSG00000163154	TNFAIP8L2	TNF alpha induced protein 8 like 2 [Source:HGNC Symbol;Acc:HGNC:26277]	protein_coding	919	978	103	270	464	825	572	550	478	742	507	1539	467	479	176	774	251	1139	170	505	375	957	608	496	71	948	608	1181	314	1414	353	573	246	2527	139	1551	810	1003	347	994	52	1312	100	22	441
ENSG00000232995	ENSG00000232995	RGS5	regulator of G protein signaling 5 [Source:NCBI gene (formerly Entrezgene);Acc:8490]	lncRNA	8	23	10	0	39	14	28	17	22	45	1	81	21	31	24	0	8	35	0	30	11	55	12	28	0	11	20	51	3	71	14	14	11	34	61	11	0	0	22	0	0	0	0	10	16
ENSG00000236957	ENSG00000236957		pseudogene similar to part of a immunoglobulin receptor-like protein	transcribed_unprocessed_pseudogene	0	9	2	5	0	1	0	0	1	35	0	0	0	0	1	0	3	0	0	7	0	4	3	0	1	0	2	7	1	0	0	1	1	1	1	8	0	3	0	0	1	3	56	5	19
ENSG00000177173	ENSG00000177173	NAP1L4P1	nucleosome assembly protein 1 like 4 pseudogene 1 [Source:HGNC Symbol;Acc:HGNC:39740]	processed_pseudogene	0	2	0	7	5	6	0	0	0	0	0	0	0	0	0	1	7	1	0	7	31	28	0	0	4	9	0	2	0	15	0	7	0	0	0	0	1	82	8	5	0	0	0	0	6
ENSG00000277406	ENSG00000277406	SEC22B4P	SEC22 homolog B4, pseudogene [Source:HGNC Symbol;Acc:HGNC:53892]	transcribed_unprocessed_pseudogene	18	26	4	17	60	44	27	7	17	30	8	71	30	55	3	6	12	43	16	10	52	11	109	42	5	53	56	65	49	99	16	12	10	58	12	20	10	4	8	8	10	6	6	44	3
ENSG00000162729	ENSG00000162729	IGSF8	immunoglobulin superfamily member 8 [Source:HGNC Symbol;Acc:HGNC:17813]	protein_coding	20	0	9	6	78	1	105	14	21	16	36	7	18	18	49	0	9	35	1	5	0	6	24	2	8	39	38	0	65	21	45	21	17	17	10	3	9	2	52	4	4	0	98	15	26
ENSG00000143158	ENSG00000143158	MPC2	mitochondrial pyruvate carrier 2 [Source:HGNC Symbol;Acc:HGNC:24515]	protein_coding	729	1561	229	440	1373	1129	1211	1023	444	1988	838	2024	1046	1568	251	828	307	2200	205	459	900	1213	1730	2449	164	2646	907	1776	1406	2449	548	474	381	2264	674	437	843	2175	937	847	1291	2859	4822	1543	602
ENSG00000271092	ENSG00000271092	TLCD4-RWDD3	TLCD4-RWDD3 readthrough [Source:HGNC Symbol;Acc:HGNC:49388]	protein_coding	294	544	82	167	394	294	532	326	197	512	244	514	385	357	173	366	112	698	113	362	297	320	808	839	57	757	124	295	460	977	128	144	119	580	274	532	339	600	250	150	967	299	0	7	111
ENSG00000232148	ENSG00000232148	FMO11P	flavin containing dimethylaniline monoxygenase 11, pseudogene [Source:HGNC Symbol;Acc:HGNC:32212]	unprocessed_pseudogene	0	2	0	2	1	1	0	0	1	3	0	1	1	1	4	0	9	7	1	11	0	5	3	1	1	0	2	5	1	0	4	0	0	3	1	0	9	0	4	11	0	0	3	2	5
ENSG00000278811	ENSG00000278811	LINC00624	long intergenic non-protein coding RNA 624 [Source:HGNC Symbol;Acc:HGNC:44254]	lncRNA	60	165	23	43	74	112	32	46	33	108	47	258	75	129	41	123	28	142	36	85	53	96	84	132	19	181	108	110	148	172	38	21	16	111	24	13	57	0	108	69	4	126	0	24	11
ENSG00000000460	ENSG00000000460	C1orf112	chromosome 1 open reading frame 112 [Source:HGNC Symbol;Acc:HGNC:25565]	protein_coding	95	481	37	145	251	165	166	151	121	849	193	393	227	223	90	271	62	316	72	208	203	452	196	261	33	340	356	340	356	380	110	86	65	459	114	278	269	36	49	105	61	28	57	13	43
ENSG00000188859	ENSG00000188859	FAM78B	family with sequence similarity 78 member B [Source:HGNC Symbol;Acc:HGNC:13495]	protein_coding	1	8	0	3	42	34	0	4	0	34	11	1	4	0	1	0	0	7	0	17	10	0	8	35	1	0	0	10	31	2	23	1	1	41	4	7	0	0	2	1	0	1	80	11	22
ENSG00000135862	ENSG00000135862	LAMC1	laminin subunit gamma 1 [Source:HGNC Symbol;Acc:HGNC:6492]	protein_coding	161	131	38	32	843	26	165	28	189	44	204	153	621	84	534	105	95	77	82	151	875	207	952	82	65	57	164	53	2243	48	416	10	158	95	1623	9	179	4	1356	107	122	2	52	105	42
ENSG00000158473	ENSG00000158473	CD1D	CD1d molecule [Source:HGNC Symbol;Acc:HGNC:1637]	protein_coding	167	121	58	40	44	132	97	93	37	204	41	264	38	90	8	128	77	137	27	83	138	197	0	80	16	101	33	29	56	249	47	11	30	463	5	7	414	469	14	123	0	1224	5	55	143
ENSG00000227722	ENSG00000227722		dynactin 4 pseudogene	transcribed_processed_pseudogene	0	0	0	13	0	0	7	3	1	36	0	0	0	0	0	0	0	29	1	31	0	0	0	11	0	6	0	5	4	14	3	1	0	0	6	0	1	1	0	0	0	0	0	12	4
ENSG00000275801	ENSG00000275801		SLAM family member 9 (SLAMF9) pseudogene	unprocessed_pseudogene	0	0	0	0	33	0	0	0	0	8	0	0	0	0	0	0	0	9	0	1	0	0	0	1	0	0	0	0	0	19	0	3	4	0	2	2	0	1	1	38	0	0	0	3	2
ENSG00000143198	ENSG00000143198	MGST3	microsomal glutathione S-transferase 3 [Source:HGNC Symbol;Acc:HGNC:7064]	protein_coding	583	1421	291	379	1027	481	1016	725	367	1064	832	1561	788	681	464	694	288	1392	307	638	1421	1047	1639	1326	121	1563	489	670	1820	1863	523	417	340	1767	813	744	813	1492	942	1000	2266	1992	3780	762	708
ENSG00000143318	ENSG00000143318	CASQ1	calsequestrin 1 [Source:HGNC Symbol;Acc:HGNC:1512]	protein_coding	9	20	2	21	20	4	16	12	5	56	0	0	0	0	28	7	8	48	1	24	15	12	1	12	1	7	12	29	21	13	6	5	2	3	18	6	0	5	3	53	0	0	0	3	240
ENSG00000232188	ENSG00000232188		novel transcript	lncRNA	0	0	0	7	0	6	1	0	3	2	0	0	0	0	0	0	0	1	1	0	0	6	4	0	2	4	0	0	1	4	1	1	0	0	1	1	0	0	3	0	3	1	0	0	4
ENSG00000143621	ENSG00000143621	ILF2	interleukin enhancer binding factor 2 [Source:HGNC Symbol;Acc:HGNC:6037]	protein_coding	1798	5627	730	1307	2861	2444	2968	2362	1053	5193	1752	7434	2796	3759	1379	2194	587	4425	792	2034	2913	3658	3377	4167	339	4023	2265	3828	3979	5372	1260	2168	960	6918	1368	3394	2398	3736	2034	4551	3453	11230	27747	4359	1030
ENSG00000143155	ENSG00000143155	TIPRL	TOR signaling pathway regulator [Source:HGNC Symbol;Acc:HGNC:30231]	protein_coding	660	1235	211	376	1279	582	1014	669	450	1225	432	1755	924	1182	264	357	205	1074	227	499	952	772	1414	977	77	797	1049	1710	1789	1419	518	581	289	1885	195	1168	516	321	345	512	877	832	2412	17	178
ENSG00000143156	ENSG00000143156	NME7	NME/NM23 family member 7 [Source:HGNC Symbol;Acc:HGNC:20461]	protein_coding	292	274	194	104	666	194	543	177	109	205	186	530	249	259	155	109	89	249	94	171	738	290	606	281	89	284	183	276	662	350	233	85	180	658	72	295	354	545	385	237	1316	388	4258	10	14
ENSG00000198771	ENSG00000198771	RCSD1	RCSD domain containing 1 [Source:HGNC Symbol;Acc:HGNC:28310]	protein_coding	4455	3825	1017	1194	6257	4191	4436	2044	2321	4460	3161	7508	4317	3682	1638	4609	1565	3332	1366	2266	3220	3492	3663	2466	500	4232	3815	3528	3203	5789	2042	1393	1863	6299	3029	806	5268	1554	2236	4411	5170	7716	154	77	483
ENSG00000237756	ENSG00000237756		novel transcript	lncRNA	0	0	1	27	19	23	0	1	4	3	0	0	0	1	19	0	3	23	0	20	0	37	10	3	8	24	12	21	14	0	4	0	0	0	8	0	0	0	52	0	0	0	0	0	4
ENSG00000116147	ENSG00000116147	TNR	tenascin R [Source:HGNC Symbol;Acc:HGNC:11953]	protein_coding	1	27	5	20	53	34	6	30	8	179	0	24	1	3	17	1	10	114	3	101	4	162	18	65	19	52	8	50	48	93	18	17	3	17	56	17	51	6	57	4	7	5	44	97	101
ENSG00000213064	ENSG00000213064	SFT2D2	SFT2 domain containing 2 [Source:HGNC Symbol;Acc:HGNC:25140]	protein_coding	71	224	46	117	364	186	134	104	74	141	174	507	74	174	189	100	53	261	29	159	80	149	325	134	32	188	153	208	368	469	88	104	42	218	48	114	180	164	158	60	8	372	50	57	25
ENSG00000203307	ENSG00000203307	FAM78B-AS1	FAM78B antisense RNA 1 [Source:HGNC Symbol;Acc:HGNC:40639]	lncRNA	0	3	0	1	0	5	0	0	0	34	0	0	0	0	1	0	0	3	0	6	0	12	2	0	0	4	1	1	1	0	1	0	0	3	8	0	0	0	0	0	0	0	0	0	1
ENSG00000143179	ENSG00000143179	UCK2	uridine-cytidine kinase 2 [Source:HGNC Symbol;Acc:HGNC:12562]	protein_coding	91	931	89	204	307	343	251	392	116	862	256	910	271	575	151	349	100	599	55	290	188	543	309	522	61	836	606	757	435	1175	206	269	109	839	219	16	400	753	344	1041	6	1451	6219	25	245
ENSG00000143315	ENSG00000143315	PIGM	phosphatidylinositol glycan anchor biosynthesis class M [Source:HGNC Symbol;Acc:HGNC:18858]	protein_coding	26	165	2	19	149	62	42	29	40	155	35	121	13	24	25	32	20	66	1	82	3	153	71	55	25	68	23	24	243	58	19	35	13	30	259	15	7	6	113	3	6	8	59	2878	20
ENSG00000116199	ENSG00000116199	FAM20B	FAM20B glycosaminoglycan xylosylkinase [Source:HGNC Symbol;Acc:HGNC:23017]	protein_coding	141	367	37	98	279	408	467	264	124	520	90	1153	543	357	169	455	168	633	83	189	729	219	749	522	72	543	353	276	915	638	214	210	141	628	119	5	550	10	486	40	59	2	2	53	21
ENSG00000143185	ENSG00000143185	XCL2	X-C motif chemokine ligand 2 [Source:HGNC Symbol;Acc:HGNC:10646]	protein_coding	4	4	4	17	32	11	9	6	1	7	25	503	13	90	0	13	4	43	3	86	29	23	2	21	2	50	6	9	15	155	0	74	0	157	0	72	0	1	1	36	1	0	6	0	6
ENSG00000116260	ENSG00000116260	QSOX1	quiescin sulfhydryl oxidase 1 [Source:HGNC Symbol;Acc:HGNC:9756]	protein_coding	46	49	12	19	113	58	153	43	32	141	5	104	69	51	63	40	37	62	14	51	260	321	135	68	18	76	66	80	356	58	62	44	40	88	504	21	341	13	259	193	42	346	16	97	298
ENSG00000272931	ENSG00000272931	LRRC8D-DT	LRRC8D divergent transcript [Source:HGNC Symbol;Acc:HGNC:55186]	lncRNA	12	13	0	2	4	15	6	2	10	35	9	19	4	2	0	0	0	9	0	2	17	0	6	1	0	9	18	3	27	12	8	1	1	17	1	0	1	0	9	39	0	0	5	15	8
ENSG00000143190	ENSG00000143190	POU2F1	POU class 2 homeobox 1 [Source:HGNC Symbol;Acc:HGNC:9212]	protein_coding	55	152	26	60	185	195	30	83	42	223	71	357	160	142	83	13	42	197	23	147	204	152	124	140	44	397	88	149	188	192	66	94	46	65	317	11	93	4	47	243	19	8	42	114	43
ENSG00000225475	ENSG00000225475		riribosomal protein S2 (RPS2) pseudogene	processed_pseudogene	2	8	2	4	6	16	3	1	6	13	0	1	0	8	12	1	4	5	2	12	8	6	17	5	3	12	10	9	4	13	1	6	0	3	1	3	5	5	20	1	5	4	14	2	6
ENSG00000287697	ENSG00000287697		novel transcript, antisense to CACYBP	lncRNA	17	39	3	20	22	42	33	12	22	60	25	36	29	24	9	20	6	47	2	21	26	15	24	30	6	41	24	17	31	123	4	14	6	50	8	0	17	93	10	49	106	0	0	12	38
ENSG00000075945	ENSG00000075945	KIFAP3	kinesin associated protein 3 [Source:HGNC Symbol;Acc:HGNC:17060]	protein_coding	213	428	127	210	806	329	371	247	196	488	308	1119	537	553	176	270	189	611	123	311	945	478	681	741	142	695	252	339	861	608	215	232	185	747	152	17	157	283	392	177	962	576	0	3	13
ENSG00000235303	ENSG00000235303		novel transcript	lncRNA	1	6	0	4	4	5	1	15	2	28	0	3	0	0	14	0	0	0	7	22	4	3	10	1	12	1	6	6	2	35	1	3	1	0	0	1	1	0	22	0	2	0	44	1	9
ENSG00000234810	ENSG00000234810		novel transcript	lncRNA	18	17	20	24	17	82	76	27	19	66	47	34	33	29	43	127	13	60	21	22	17	69	104	82	18	119	101	34	47	67	37	24	48	59	15	291	77	1	228	54	12	92	1570	36	102
ENSG00000235628	ENSG00000235628	TNR-IT1	TNR intronic transcript 1 [Source:HGNC Symbol;Acc:HGNC:41391]	lncRNA	0	11	0	0	0	0	0	0	3	7	0	0	0	2	1	4	1	1	0	10	0	19	0	2	1	0	2	13	8	0	0	0	0	0	0	5	0	0	0	0	0	0	0	0	4
ENSG00000232551	ENSG00000232551	MTCO1P14	MT-CO1 pseudogene 14 [Source:HGNC Symbol;Acc:HGNC:52016]	processed_pseudogene	0	0	0	0	51	27	0	0	0	0	0	0	0	0	0	0	0	0	0	0	0	20	0	0	0	0	0	0	0	0	1	4	1	0	0	2	0	1	0	0	0	0	0	12	0
ENSG00000092607	ENSG00000092607	TBX15	T-box transcription factor 15 [Source:HGNC Symbol;Acc:HGNC:11594]	protein_coding	7	10	11	20	53	24	27	14	8	18	2	12	43	15	10	4	42	8	3	17	24	51	41	1	19	10	20	10	246	6	4	1	11	6	32	14	4	8	71	2	0	1	37	23	30
ENSG00000230704	ENSG00000230704		novel transcript	lncRNA	0	1	0	0	10	1	2	0	0	0	0	0	0	0	0	0	0	0	0	13	0	6	0	0	1	0	1	0	0	0	3	0	0	0	0	1	0	0	9	8	0	0	0	13	0
ENSG00000283255	ENSG00000283255		novel transcript	lncRNA	1	1	0	5	7	0	0	5	1	1	0	0	0	1	1	0	3	20	0	12	0	46	10	3	0	1	5	0	0	1	0	3	2	0	19	1	0	4	0	0	2	0	0	3	1
ENSG00000227741	ENSG00000227741		novel transcript	lncRNA	26	65	22	19	66	36	48	34	21	61	28	41	57	48	57	44	11	76	17	29	90	63	58	57	5	44	13	27	59	35	33	18	17	60	59	21	20	45	46	94	64	42	6	2	12
ENSG00000237049	ENSG00000237049	RPL34P1	ribosomal protein L34 pseudogene 1 [Source:HGNC Symbol;Acc:HGNC:10341]	processed_pseudogene	3	9	4	3	6	15	9	7	1	7	6	12	5	9	0	5	6	9	1	10	6	38	13	7	1	1	9	8	8	16	4	3	1	18	0	0	0	0	0	0	0	0	31	0	2
ENSG00000236364	ENSG00000236364		novel transcript, antisense to UCK2	lncRNA	25	306	32	68	119	100	126	121	41	356	65	248	91	224	45	100	11	221	8	133	92	189	91	161	31	321	148	298	164	466	76	101	42	326	99	3	87	235	167	323	0	401	2811	19	100
ENSG00000117091	ENSG00000117091	CD48	CD48 molecule [Source:HGNC Symbol;Acc:HGNC:1683]	protein_coding	197	382	131	247	601	528	256	270	161	423	440	2157	249	596	180	336	98	525	104	398	273	599	182	284	41	419	171	476	360	823	150	581	108	1660	75	637	213	338	176	786	3	40	57	21	60
ENSG00000143171	ENSG00000143171	RXRG	retinoid X receptor gamma [Source:HGNC Symbol;Acc:HGNC:10479]	protein_coding	8	4	2	1	94	8	29	1	12	33	0	0	14	0	49	9	9	10	0	15	26	12	64	7	9	3	18	9	3	18	42	0	4	0	1	11	1	2	2	19	3	0	0	2269	20
ENSG00000224718	ENSG00000224718	LINC01657	long intergenic non-protein coding RNA 1657 [Source:HGNC Symbol;Acc:HGNC:52445]	lncRNA	0	18	0	0	13	18	0	0	0	22	0	0	0	1	0	2	0	0	0	12	2	28	6	2	0	0	0	12	2	15	1	3	0	0	0	23	1	1	4	0	0	0	0	37	1
ENSG00000047410	ENSG00000047410	TPR	translocated promoter region, nuclear basket protein [Source:HGNC Symbol;Acc:HGNC:12017]	protein_coding	515	1098	187	418	1146	1000	873	624	487	1388	1228	2831	1628	969	1015	711	677	1487	426	620	1632	1281	1667	1146	138	1418	699	1045	2830	1749	671	707	433	811	1064	2140	598	379	1104	784	505	4	0	91	233
ENSG00000231992	ENSG00000231992		novel transcript	lncRNA	5	28	1	21	10	23	10	10	0	30	0	30	0	7	0	0	8	24	0	4	1	5	8	14	4	16	0	8	3	30	0	1	0	15	21	6	35	15	6	7	3	2	0	0	16
ENSG00000018625	ENSG00000018625	ATP1A2	ATPase Na+/K+ transporting subunit alpha 2 [Source:HGNC Symbol;Acc:HGNC:800]	protein_coding	1	25	12	51	74	24	32	8	8	52	0	24	3	6	71	8	35	53	3	32	34	99	6	26	13	32	19	33	51	34	33	3	5	40	17	167	2	25	43	5	0	5	90	80	49
ENSG00000171806	ENSG00000171806	METTL18	methyltransferase like 18 [Source:HGNC Symbol;Acc:HGNC:28793]	protein_coding	109	261	51	40	229	176	160	121	75	215	124	492	112	140	185	119	94	280	30	140	353	125	238	181	29	188	131	246	270	364	127	117	101	550	295	114	228	0	51	37	1201	370	7	4	164
ENSG00000287919	ENSG00000287919		novel transcript	lncRNA	1	4	0	0	0	22	0	2	0	0	0	0	2	0	2	0	0	10	0	13	5	55	11	2	5	20	0	17	0	0	0	2	1	5	1	1	0	1	2	0	0	0	0	3	2
ENSG00000229914	ENSG00000229914		ribosomal protein S10 (RPS10) pseudogene	processed_pseudogene	2	6	0	3	4	0	1	1	0	0	6	0	0	0	9	0	6	5	0	10	0	1	1	0	4	0	2	1	1	0	0	0	0	1	0	0	1	37	13	0	1	0	0	2	0
ENSG00000198358	ENSG00000198358		antisense to ITLN2	lncRNA	16	36	15	6	10	27	76	4	14	15	0	0	10	0	17	7	6	19	21	20	28	26	34	22	16	31	26	20	58	21	39	5	27	11	69	68	3	0	79	8	249	1	9	22	9
ENSG00000229407	ENSG00000229407		novel transcript	lncRNA	0	0	0	0	0	0	0	1	2	1	0	0	0	0	0	0	1	1	0	0	4	0	0	0	0	0	0	0	0	1	0	0	0	0	0	1	0	0	1	0	0	0	6	31	3
ENSG00000134216	ENSG00000134216	CHIA	chitinase acidic [Source:HGNC Symbol;Acc:HGNC:17432]	protein_coding	0	5	0	8	1	2	13	25	5	54	0	0	0	0	9	0	21	3	0	34	0	2	1	2	4	0	12	11	6	1	1	2	0	0	6	5	37	1	4	0	3	0	15	11	25
ENSG00000254154	ENSG00000254154	CRYZL2P-SEC16B	CRYZL2P-SEC16B readthrough [Source:HGNC Symbol;Acc:HGNC:53757]	lncRNA	189	69	70	27	325	40	396	34	110	201	170	234	167	60	219	113	70	110	85	72	383	155	312	60	72	145	69	60	438	68	118	41	158	167	611	15	102	2	181	0	816	4	22	86	38
ENSG00000162694	ENSG00000162694	EXTL2	exostosin like glycosyltransferase 2 [Source:HGNC Symbol;Acc:HGNC:3516]	protein_coding	11	54	27	18	81	15	44	30	40	0	77	92	90	35	42	57	54	60	19	89	212	57	83	5	36	46	45	32	154	79	103	2	50	67	172	7	37	3	348	79	0	0	25	4	11
ENSG00000214262	ENSG00000214262	ANKRD36BP1	ankyrin repeat domain 36B pseudogene 1 [Source:HGNC Symbol;Acc:HGNC:28169]	transcribed_processed_pseudogene	1	22	1	3	29	9	3	4	0	35	19	8	0	2	3	0	1	14	4	11	0	7	4	5	5	10	7	20	17	22	3	10	0	4	3	0	1	3	5	0	0	0	0	2	2
ENSG00000183853	ENSG00000183853	KIRREL1	kirre like nephrin family adhesion molecule 1 [Source:HGNC Symbol;Acc:HGNC:15734]	protein_coding	4	26	5	15	117	4	50	9	2	75	45	1	95	13	30	4	22	31	44	16	184	19	16	18	7	27	7	50	301	76	84	13	8	82	19	27	11	11	140	9	2	4	57	169	53
ENSG00000215835	ENSG00000215835		Ewing sarcoma breakpoint region 1 (EWSR1) pseudogene	processed_pseudogene	1	4	1	0	2	2	5	3	1	6	5	15	3	7	2	6	6	8	2	2	14	29	6	4	0	13	5	9	7	1	4	4	0	7	1	1	4	3	1	5	11	9	17	12	16
ENSG00000118197	ENSG00000118197	DDX59	DEAD-box helicase 59 [Source:HGNC Symbol;Acc:HGNC:25360]	protein_coding	577	684	195	163	1027	474	813	344	346	660	287	1017	477	477	321	426	211	745	140	291	765	550	800	405	129	706	311	581	893	866	280	357	268	1408	289	348	626	27	306	456	18	0	5604	47	29
ENSG00000135842	ENSG00000135842	NIBAN1	niban apoptosis regulator 1 [Source:HGNC Symbol;Acc:HGNC:16784]	protein_coding	1804	1381	313	438	2907	1647	2547	882	1355	2275	866	3855	1994	1096	905	1095	1086	4034	491	2015	789	1952	2354	1935	263	4321	1003	1911	2980	5575	1660	2995	543	5527	870	1883	1974	1277	1297	680	8	1007	172	68	251
ENSG00000229258	ENSG00000229258	LPGAT1-AS1	LPGAT1 antisense RNA 1 [Source:HGNC Symbol;Acc:HGNC:41221]	lncRNA	0	10	0	10	1	0	1	0	0	0	0	0	0	0	0	1	1	11	0	38	0	42	1	0	5	5	4	5	0	21	1	0	0	0	0	0	15	0	0	10	0	0	0	12	7
ENSG00000241318	ENSG00000241318	WDR82P2	WD repeat domain 82 pseudogene 2 [Source:HGNC Symbol;Acc:HGNC:33513]	processed_pseudogene	0	6	0	1	0	0	0	0	0	1	1	1	0	0	2	0	1	0	0	10	0	12	1	0	0	13	0	0	0	0	0	0	2	6	0	0	11	0	0	0	0	0	58	4	6
ENSG00000121454	ENSG00000121454	LHX4	LIM homeobox 4 [Source:HGNC Symbol;Acc:HGNC:21734]	protein_coding	11	25	12	7	14	59	37	18	4	11	0	4	56	21	82	53	16	41	5	13	16	74	67	36	4	63	21	29	40	25	13	17	2	50	108	3	54	21	3	133	6	13	16	24	224
ENSG00000184155	ENSG00000184155	OR10J5	olfactory receptor family 10 subfamily J member 5 [Source:HGNC Symbol;Acc:HGNC:14993]	protein_coding	0	23	0	3	0	1	0	0	0	0	0	6	0	0	0	0	0	14	1	14	10	0	7	21	4	0	0	10	17	1	6	0	0	0	0	0	0	0	0	0	0	0	0	25	4
ENSG00000058085	ENSG00000058085	LAMC2	laminin subunit gamma 2 [Source:HGNC Symbol;Acc:HGNC:6493]	protein_coding	23	45	18	24	164	79	30	13	12	142	107	11	24	7	128	16	32	67	9	67	95	124	60	44	16	44	28	53	187	77	44	14	14	23	73	11	8	7	108	85	95	0	7	41	79
ENSG00000260088	ENSG00000260088	DDX59-AS1	DDX59 antisense RNA 1 [Source:HGNC Symbol;Acc:HGNC:41094]	lncRNA	1	2	0	6	6	18	2	1	3	7	4	0	6	0	5	1	1	6	1	2	6	7	9	7	3	2	3	4	8	6	0	2	0	8	22	6	0	0	0	0	0	0	0	19	12
ENSG00000287978	ENSG00000287978		novel transcript	lncRNA	65	49	1	0	70	20	61	5	12	63	67	66	16	10	7	20	15	31	16	3	36	15	32	18	4	77	30	27	32	34	13	3	12	28	33	116	82	7	34	23	123	86	970	0	79
ENSG00000116815	ENSG00000116815	CD58	CD58 molecule [Source:HGNC Symbol;Acc:HGNC:1688]	protein_coding	289	175	66	41	449	188	578	148	164	212	278	554	264	210	152	177	103	257	142	83	245	275	364	281	52	210	186	167	506	345	269	154	87	542	17	1	196	124	253	109	358	361	0	0	78
ENSG00000232917	ENSG00000232917	HSPE1P6	heat shock protein family E (Hsp10) member 1 pseudogene 6 [Source:HGNC Symbol;Acc:HGNC:49325]	processed_pseudogene	0	7	4	6	6	0	0	1	5	1	0	2	0	4	17	0	0	7	2	9	4	2	8	1	13	2	4	13	3	16	3	1	0	5	8	1	4	0	6	0	0	0	0	0	1
ENSG00000237131	ENSG00000237131		NADH dehydrogenase (ubiquinone) 1 alpha subcomplex, 4, 9kDa (NDUFA4) pseudogene	processed_pseudogene	0	10	0	12	2	0	2	1	8	6	0	0	0	5	0	0	0	17	0	2	0	1	13	0	16	0	2	16	4	31	0	0	0	1	0	0	0	0	1	0	0	0	0	0	0
ENSG00000143167	ENSG00000143167	GPA33	glycoprotein A33 [Source:HGNC Symbol;Acc:HGNC:4445]	protein_coding	6	13	0	7	3	2	8	4	1	15	0	14	0	6	1	4	0	16	0	25	1	50	22	8	0	35	1	47	112	0	2	8	2	40	4	9	8	6	3	1	1	0	43	16	14
ENSG00000143184	ENSG00000143184	XCL1	X-C motif chemokine ligand 1 [Source:HGNC Symbol;Acc:HGNC:10645]	protein_coding	0	6	3	21	21	0	5	9	7	0	0	81	4	125	1	16	1	48	6	115	0	9	4	10	3	29	8	61	9	38	14	22	3	114	31	25	20	0	13	64	0	0	0	0	6
ENSG00000176320	ENSG00000176320		novel transcript	lncRNA	2	14	3	28	2	12	4	17	8	56	51	3	2	3	11	1	5	15	1	27	3	9	10	6	9	7	2	11	1	0	9	2	1	15	0	6	4	9	55	0	0	1	27	13	6
ENSG00000260976	ENSG00000260976	LINC01633	long intergenic non-protein coding RNA 1633 [Source:HGNC Symbol;Acc:HGNC:52420]	lncRNA	1	7	0	0	0	0	0	4	0	14	0	1	0	0	0	2	1	0	0	7	0	29	0	0	0	0	0	13	2	0	0	0	1	0	3	3	1	4	0	2	0	0	0	0	2
ENSG00000224691	ENSG00000224691		novel transcript	lncRNA	0	11	0	9	11	8	0	2	0	0	0	0	9	0	10	0	0	5	2	13	9	2	7	0	3	15	5	9	4	0	6	0	4	0	76	1	0	1	8	1	7	0	0	0	9
ENSG00000286572	ENSG00000286572		novel transcript, antisense to SOX13	lncRNA	5	2	0	4	5	11	0	1	2	6	0	2	4	0	6	1	3	28	0	7	1	16	11	11	2	12	6	9	4	2	1	2	1	2	2	19	0	4	7	1	7	0	27	7	15
ENSG00000228215	ENSG00000228215	LINC02770	long intergenic non-protein coding RNA 2770 [Source:HGNC Symbol;Acc:HGNC:54290]	lncRNA	0	0	7	6	0	15	15	4	0	10	0	0	29	6	29	33	0	22	0	19	0	0	19	0	0	11	0	17	41	20	0	0	1	0	0	2	0	0	54	0	0	108	0	5	0
ENSG00000177807	ENSG00000177807	KCNJ10	potassium inwardly rectifying channel subfamily J member 10 [Source:HGNC Symbol;Acc:HGNC:6256]	protein_coding	5	1	7	14	13	96	40	4	6	6	0	74	3	26	9	1	0	35	0	39	35	43	17	5	5	47	33	11	2	19	13	3	0	1	69	6	2	5	10	5	1	2	1	42	14
ENSG00000233691	ENSG00000233691		pseudogene similar to part of DEAD (Asp-Glu-Ala-Asp) box polypeptide 56 (DDX56)	processed_pseudogene	0	1	0	0	0	8	0	0	0	0	0	0	0	0	0	0	0	4	0	0	0	0	2	0	7	0	0	0	3	0	0	0	0	0	3	3	0	0	0	0	0	0	0	25	7
ENSG00000283518	ENSG00000283518	LINC02775	long intergenic non-protein coding RNA 2775 [Source:HGNC Symbol;Acc:HGNC:54294]	lncRNA	1	1	6	9	6	24	3	17	11	0	0	3	0	0	1	0	0	20	3	22	0	30	26	1	3	1	7	3	0	11	3	0	3	18	10	0	8	4	0	1	0	0	2	10	15
ENSG00000143228	ENSG00000143228	NUF2	NUF2 component of NDC80 kinetochore complex [Source:HGNC Symbol;Acc:HGNC:14621]	protein_coding	37	275	16	56	109	177	18	157	72	508	43	142	15	231	54	53	7	316	9	194	6	168	207	485	45	393	145	319	76	418	20	60	29	271	25	0	1	0	120	9	0	291	59	5	7
ENSG00000174514	ENSG00000174514	MFSD4A	major facilitator superfamily domain containing 4A [Source:HGNC Symbol;Acc:HGNC:25433]	protein_coding	3	35	2	33	72	31	11	38	5	34	13	20	2	7	50	18	0	62	35	30	28	92	86	42	28	25	8	30	1	65	45	10	1	22	17	19	8	4	62	4	10	0	32	110	37
ENSG00000143178	ENSG00000143178	TBX19	T-box transcription factor 19 [Source:HGNC Symbol;Acc:HGNC:11596]	protein_coding	9	55	0	31	113	4	1	10	20	64	3	92	29	11	60	1	35	97	9	27	66	45	82	25	27	28	72	55	55	70	3	6	3	5	4	11	5	2	5	0	0	0	0	24	19
ENSG00000116833	ENSG00000116833	NR5A2	nuclear receptor subfamily 5 group A member 2 [Source:HGNC Symbol;Acc:HGNC:7984]	protein_coding	265	329	96	67	328	47	617	49	55	81	41	163	218	187	248	313	16	139	274	106	418	182	291	143	56	47	114	64	322	191	19	22	162	60	57	9	231	17	190	111	2	1	6	72	20
ENSG00000227740	ENSG00000227740	LINC02803	long intergenic non-protein coding RNA 2803 [Source:HGNC Symbol;Acc:HGNC:54328]	lncRNA	1	10	8	2	1	4	0	8	1	26	0	9	0	1	10	0	1	16	1	18	1	31	1	1	10	13	6	13	11	0	0	0	3	2	15	4	4	6	13	4	1	0	12	0	7
ENSG00000260990	ENSG00000260990		novel transcript	lncRNA	0	1	6	3	0	0	0	2	0	7	0	9	0	1	3	0	0	9	0	4	0	1	0	0	0	7	0	6	6	6	0	3	0	0	1	1	3	0	9	0	0	0	2	11	3
ENSG00000000457	ENSG00000000457	SCYL3	SCY1 like pseudokinase 3 [Source:HGNC Symbol;Acc:HGNC:19285]	protein_coding	117	230	57	92	451	279	225	154	106	429	232	603	208	193	110	259	94	540	123	222	308	120	347	328	28	302	252	267	345	415	178	163	76	436	310	661	172	209	95	173	7	9	12	36	23
ENSG00000143507	ENSG00000143507	DUSP10	dual specificity phosphatase 10 [Source:HGNC Symbol;Acc:HGNC:3065]	protein_coding	50	175	23	58	54	75	70	93	78	151	140	657	2	220	28	162	16	139	20	103	64	53	310	68	11	135	90	110	300	246	38	93	22	266	78	8	154	0	21	15	0	472	31	15	18
ENSG00000285638	ENSG00000285638		novel transcript	lncRNA	0	0	0	0	0	0	0	0	0	0	0	0	0	0	0	0	0	0	0	30	0	22	0	0	0	0	1	0	0	0	1	0	0	0	1	1	0	0	0	0	0	0	0	4	12
ENSG00000226520	ENSG00000226520	KIRREL1-IT1	KIRREL1 intronic transcript 1 [Source:HGNC Symbol;Acc:HGNC:41412]	lncRNA	0	3	1	1	1	13	0	3	0	8	0	5	0	0	2	0	0	17	0	5	0	25	0	1	0	9	0	8	0	25	0	2	0	3	0	2	0	1	0	21	0	0	0	23	2
ENSG00000284592	ENSG00000284592		novel SLAM family member pseudogene	unprocessed_pseudogene	0	2	0	0	0	1	0	0	1	17	0	2	0	0	0	1	0	4	0	14	0	0	1	6	0	4	0	0	0	3	0	0	0	0	0	0	2	0	0	0	0	0	0	0	0
ENSG00000230987	ENSG00000230987		DEAH (Asp-Glu-Ala-His) box polypeptide 29 (DHX29) pseudogene	processed_pseudogene	1	0	2	4	4	3	0	4	0	9	1	0	4	1	12	0	0	0	0	14	0	3	9	0	8	5	0	9	1	11	2	0	0	1	6	3	1	0	27	0	5	0	0	7	3
ENSG00000232527	ENSG00000232527	LINC02802	long intergenic non-protein coding RNA 2802 [Source:HGNC Symbol;Acc:HGNC:54326]	lncRNA	8	9	30	18	139	17	65	15	7	19	17	13	36	9	19	14	19	9	5	2	63	41	63	6	6	16	16	5	255	10	25	9	15	41	67	0	20	2	82	33	0	0	0	0	0
ENSG00000225325	ENSG00000225325		novel transcript	lncRNA	0	9	0	2	21	6	1	2	3	24	0	1	1	3	14	6	4	18	2	29	4	4	11	2	2	8	6	7	19	23	6	4	1	12	1	0	2	1	2	0	0	0	2	8	26
ENSG00000229961	ENSG00000229961		novel SLAM family member pseudogene	transcribed_unprocessed_pseudogene	0	14	6	7	25	9	3	1	4	38	0	3	0	3	21	1	8	1	2	10	0	34	3	63	4	32	3	23	2	72	2	5	8	13	28	23	2	0	15	0	3	3	0	34	11
ENSG00000157064	ENSG00000157064	NMNAT2	nicotinamide nucleotide adenylyltransferase 2 [Source:HGNC Symbol;Acc:HGNC:16789]	protein_coding	23	8	1	4	150	19	13	19	1	13	0	2	16	14	71	1	0	40	24	23	1	21	2	2	1	13	23	12	1	37	30	3	4	27	5	11	2	2	80	41	16	4	42	65	84
ENSG00000226015	ENSG00000226015	CCT8P1	chaperonin containing TCP1 subunit 8 pseudogene 1 [Source:HGNC Symbol;Acc:HGNC:35144]	processed_pseudogene	23	51	4	44	53	47	13	6	20	82	12	163	26	11	10	1	40	33	33	44	81	94	56	12	23	23	12	21	8	21	7	38	10	75	76	7	49	1	75	107	0	3	0	2	3
ENSG00000215808	ENSG00000215808	LINC01139	long intergenic non-protein coding RNA 1139 [Source:HGNC Symbol;Acc:HGNC:27924]	lncRNA	0	4	6	12	0	13	14	1	0	4	10	11	12	0	31	0	0	4	0	10	14	4	45	0	0	0	1	4	26	0	0	0	3	3	3	10	2	2	1	2	0	0	0	3	10
ENSG00000059588	ENSG00000059588	TARBP1	TAR (HIV-1) RNA binding protein 1 [Source:HGNC Symbol;Acc:HGNC:11568]	protein_coding	24	194	18	102	330	160	13	65	48	308	78	280	105	101	113	260	43	163	68	174	140	233	95	304	58	116	118	232	121	138	22	87	40	151	14	8	241	3	129	6	0	1	142	61	36
ENSG00000231512	ENSG00000231512	SEPTIN14P21	septin 14 pseudogene 21 [Source:HGNC Symbol;Acc:HGNC:51712]	transcribed_unprocessed_pseudogene	0	3	0	13	0	7	1	4	5	5	0	0	0	0	5	0	5	3	0	19	2	11	5	0	2	5	5	4	2	0	0	1	1	0	0	2	0	1	1	5	0	0	16	0	2
ENSG00000237379	ENSG00000237379	CBX1P3	chromobox 1 pseudogene 3 [Source:HGNC Symbol;Acc:HGNC:38657]	processed_pseudogene	0	8	4	3	6	9	0	3	3	5	0	0	0	0	15	0	1	14	0	4	0	10	5	0	6	6	2	6	8	17	2	6	1	9	15	2	1	4	1	0	0	0	0	4	2
ENSG00000232959	ENSG00000232959		novel transcript	lncRNA	13	42	6	15	48	17	18	23	10	37	26	100	62	53	6	28	18	42	14	19	78	27	47	51	6	58	22	24	52	36	18	15	16	44	11	0	10	27	25	10	101	58	0	0	0
ENSG00000122224	ENSG00000122224	LY9	lymphocyte antigen 9 [Source:HGNC Symbol;Acc:HGNC:6730]	protein_coding	29	152	43	38	231	212	50	144	24	110	105	552	87	115	62	82	44	412	28	279	85	261	91	249	26	391	17	134	135	484	46	85	26	318	110	667	49	166	77	303	1	0	30	78	167
ENSG00000162782	ENSG00000162782	TDRD5	tudor domain containing 5 [Source:HGNC Symbol;Acc:HGNC:20614]	protein_coding	1	45	1	20	0	16	4	6	7	31	0	3	0	0	4	2	1	25	0	51	5	72	36	14	9	86	11	9	11	6	6	3	9	5	23	1	1	1	113	3	0	1	45	52	14
ENSG00000143653	ENSG00000143653	SCCPDH	saccharopine dehydrogenase (putative) [Source:HGNC Symbol;Acc:HGNC:24275]	protein_coding	574	1088	226	281	1092	467	967	406	201	646	410	979	664	1023	317	460	313	935	166	333	838	815	904	598	58	803	668	619	1219	1099	173	212	184	1006	92	8	424	612	547	1335	567	1784	0	4	13
ENSG00000135837	ENSG00000135837	CEP350	centrosomal protein 350 [Source:HGNC Symbol;Acc:HGNC:24238]	protein_coding	249	617	133	154	836	336	374	192	256	625	566	969	321	426	245	431	115	460	129	371	1114	649	517	337	129	402	352	641	759	819	212	267	104	644	66	29	380	10	266	173	15	154	31	109	38
ENSG00000158711	ENSG00000158711	ELK4	ETS transcription factor ELK4 [Source:HGNC Symbol;Acc:HGNC:3326]	protein_coding	147	399	61	174	319	297	288	135	133	354	105	815	324	219	229	546	101	506	96	193	453	303	497	404	41	438	123	293	350	684	105	151	74	403	135	122	236	4	223	195	0	34	65	40	106
ENSG00000227747	ENSG00000227747		ribosomal protein S2 (RPS2) pseudogene	processed_pseudogene	0	12	4	19	0	9	1	1	1	3	0	0	1	0	4	0	1	2	4	2	13	4	5	5	16	9	2	19	0	0	0	0	2	3	0	0	1	0	13	0	0	0	0	0	7
ENSG00000234975	ENSG00000234975	FTH1P2	ferritin heavy chain 1 pseudogene 2 [Source:HGNC Symbol;Acc:HGNC:3989]	processed_pseudogene	361	296	199	142	525	192	785	162	160	290	226	368	320	291	176	369	110	244	158	152	391	391	403	262	50	347	159	169	592	481	240	175	156	764	24	89	61	31	35	69	66	61	100	74	69
ENSG00000162851	ENSG00000162851	TFB2M	transcription factor B2, mitochondrial [Source:HGNC Symbol;Acc:HGNC:18559]	protein_coding	59	383	36	24	433	239	151	174	71	327	253	500	204	250	110	168	79	329	38	172	317	156	370	379	43	371	62	239	188	321	132	103	46	535	270	275	160	131	179	108	0	0	20	0	9
ENSG00000143353	ENSG00000143353	LYPLAL1	lysophospholipase like 1 [Source:HGNC Symbol;Acc:HGNC:20440]	protein_coding	359	245	143	102	582	243	511	154	142	366	227	371	217	266	110	281	78	295	125	186	375	447	625	224	97	306	281	278	595	393	278	92	133	436	293	154	351	233	483	341	420	817	1	8	122
ENSG00000197965	ENSG00000197965	MPZL1	myelin protein zero like 1 [Source:HGNC Symbol;Acc:HGNC:7226]	protein_coding	1205	342	315	138	3607	409	2141	216	493	456	526	576	3068	288	2077	354	710	409	363	169	3705	251	2659	509	240	421	565	132	6147	437	1516	147	864	621	2441	582	2269	295	3113	176	1134	0	4695	1169	1053
ENSG00000143493	ENSG00000143493	INTS7	integrator complex subunit 7 [Source:HGNC Symbol;Acc:HGNC:24484]	protein_coding	198	702	26	222	423	260	144	463	128	633	198	912	273	657	194	169	111	723	53	260	483	901	297	916	63	480	430	479	492	805	260	238	77	442	484	841	103	958	140	272	7	532	95	7	13
ENSG00000179397	ENSG00000179397	CATSPERE	catsper channel auxiliary subunit epsilon [Source:HGNC Symbol;Acc:HGNC:28491]	protein_coding	1	39	0	19	27	20	6	9	8	14	43	57	30	40	10	6	1	44	0	33	13	45	15	16	16	60	10	44	1	16	0	8	1	0	13	2	26	1	6	1	1	0	9	65	20
ENSG00000117592	ENSG00000117592	PRDX6	peroxiredoxin 6 [Source:HGNC Symbol;Acc:HGNC:16753]	protein_coding	2081	4073	1097	1405	5705	2663	4676	2309	1542	4668	1770	4812	4945	3994	2318	4207	986	4035	1127	1492	6018	3361	5686	4522	613	5352	2258	3269	7459	6070	2246	1616	1754	6349	2613	3415	2751	5174	4767	3618	6246	4949	54	1867	1641
ENSG00000186197	ENSG00000186197	EDARADD	EDAR associated death domain [Source:HGNC Symbol;Acc:HGNC:14341]	protein_coding	17	77	3	25	187	41	19	14	8	79	41	755	3	86	29	4	20	65	4	99	109	68	73	83	14	23	12	74	13	215	71	68	29	83	20	105	107	87	120	84	0	3	8	48	45
ENSG00000230231	ENSG00000230231	FMO7P	flavin containing dimethylaniline monoxygenase 7, pseudogene [Source:HGNC Symbol;Acc:HGNC:32208]	unprocessed_pseudogene	0	10	2	3	0	3	0	1	0	1	0	0	0	0	2	7	1	18	0	18	4	27	8	0	5	0	0	0	1	5	0	0	0	0	0	0	0	0	0	0	0	0	0	3	4
ENSG00000227925	ENSG00000227925	LINC01655	long intergenic non-protein coding RNA 1655 [Source:HGNC Symbol;Acc:HGNC:52443]	lncRNA	2	11	0	0	14	5	3	3	1	11	0	0	0	0	14	1	4	16	0	24	1	8	0	0	1	1	5	9	4	6	0	4	1	0	5	1	0	2	10	0	0	0	0	0	1
ENSG00000162670	ENSG00000162670	BRINP3	BMP/retinoic acid inducible neural specific 3 [Source:HGNC Symbol;Acc:HGNC:22393]	protein_coding	0	11	7	22	97	27	5	0	3	32	0	7	2	0	11	5	0	11	4	31	15	26	8	4	12	53	2	17	8	12	1	0	4	2	24	8	7	1	39	5	0	0	0	14	10
ENSG00000162761	ENSG00000162761	LMX1A	LIM homeobox transcription factor 1 alpha [Source:HGNC Symbol;Acc:HGNC:6653]	protein_coding	6	5	0	3	27	22	1	2	2	47	0	1	0	2	1	2	0	1	0	7	49	8	3	2	0	5	0	4	53	11	4	1	0	0	10	8	7	3	3	1	15	4	33	54	22
ENSG00000143199	ENSG00000143199	ADCY10	adenylate cyclase 10 [Source:HGNC Symbol;Acc:HGNC:21285]	protein_coding	1	31	2	76	50	48	9	17	23	111	0	31	8	7	70	1	16	69	3	108	20	139	26	24	32	25	22	26	37	57	11	14	4	25	70	69	41	1	43	12	3	0	67	11	38
ENSG00000179930	ENSG00000179930	ZNF648	zinc finger protein 648 [Source:HGNC Symbol;Acc:HGNC:18190]	protein_coding	0	13	0	0	0	3	0	0	2	53	0	0	0	0	0	2	0	9	0	3	3	0	1	2	0	0	4	13	0	0	3	0	0	0	6	10	3	2	1	3	1	0	41	18	15
ENSG00000007908	ENSG00000007908	SELE	selectin E [Source:HGNC Symbol;Acc:HGNC:10718]	protein_coding	4	22	0	10	65	23	4	1	11	48	0	0	68	4	4	0	28	41	2	86	73	48	79	1	7	5	22	89	61	119	66	33	8	193	1	5	1	0	25	2	3	0	24	10	7
ENSG00000092978	ENSG00000092978	GPATCH2	G-patch domain containing 2 [Source:HGNC Symbol;Acc:HGNC:25499]	protein_coding	16	190	44	42	100	149	52	43	19	60	25	203	111	83	24	0	4	200	2	119	56	169	113	66	35	101	48	78	162	87	53	60	25	96	5	5	62	7	101	122	237	0	11	36	19
ENSG00000143499	ENSG00000143499	SMYD2	SET and MYND domain containing 2 [Source:HGNC Symbol;Acc:HGNC:20982]	protein_coding	944	945	241	247	1017	399	1832	424	362	807	451	1563	634	813	392	284	217	627	368	236	1377	1048	1477	803	118	1017	736	903	1528	902	608	392	511	2037	1063	346	678	585	670	1666	642	549	110	67	21
ENSG00000188404	ENSG00000188404	SELL	selectin L [Source:HGNC Symbol;Acc:HGNC:10720]	protein_coding	9047	3000	3017	1060	14347	5357	15311	2532	5243	5703	9190	7775	9880	2774	2869	3255	6860	8205	3804	2597	4707	5680	5413	1640	886	5107	5733	2851	9630	6438	6184	3391	3257	11824	4304	2883	12356	2198	4660	4296	6227	7153	22	46	5979
ENSG00000227735	ENSG00000227735	CYCSP5	CYCS pseudogene 5 [Source:HGNC Symbol;Acc:HGNC:24416]	processed_pseudogene	0	0	0	4	0	12	0	4	0	0	0	0	0	0	1	0	0	15	0	15	0	0	0	0	8	0	0	22	0	10	0	5	0	0	0	0	0	1	0	16	0	0	0	4	3
ENSG00000243062	ENSG00000243062		novel transcript	lncRNA	0	6	0	3	0	0	0	0	0	0	0	0	2	1	0	0	0	3	0	4	0	12	6	0	0	4	2	0	1	12	0	0	0	3	0	0	15	1	6	0	0	0	0	0	5
ENSG00000143196	ENSG00000143196	DPT	dermatopontin [Source:HGNC Symbol;Acc:HGNC:3011]	protein_coding	1529	22	756	5	7264	2	2457	0	350	0	1457	0	6191	9	3093	0	821	31	671	22	5620	38	3092	0	340	0	537	7	16759	21	3473	0	1259	0	4135	431	3341	0	8687	0	8306	1	25	10293	2661
ENSG00000226211	ENSG00000226211		novel pseudogene	processed_pseudogene	0	9	0	4	17	0	0	3	0	0	0	7	0	1	0	0	0	7	0	8	24	0	0	0	5	5	2	16	3	6	14	0	0	3	0	0	0	1	60	0	0	0	0	1	4
ENSG00000236942	ENSG00000236942		GABA(A) receptor-associated protein (GABARAP) pseudogene	processed_pseudogene	1	5	0	1	19	3	2	3	4	1	0	2	1	2	16	0	4	9	0	4	0	4	14	44	12	12	6	5	5	0	1	5	1	3	0	2	1	0	3	14	0	0	8	18	11
ENSG00000203697	ENSG00000203697	CAPN8	calpain 8 [Source:HGNC Symbol;Acc:HGNC:1485]	protein_coding	1	8	4	6	15	39	0	7	5	46	0	5	2	0	9	5	1	28	6	24	2	72	12	14	0	23	8	12	39	75	1	10	1	1	4	17	9	9	12	14	0	170	4	68	112
ENSG00000116574	ENSG00000116574	RHOU	ras homolog family member U [Source:HGNC Symbol;Acc:HGNC:17794]	protein_coding	246	448	184	112	988	244	485	244	140	345	160	397	587	333	328	250	196	381	147	161	1597	602	904	188	43	265	308	297	1058	326	254	185	173	527	255	456	474	118	583	299	405	140	964	591	193
ENSG00000287929	ENSG00000287929		novel transcript, antisense to NMNAT2	lncRNA	1	0	3	2	32	0	1	0	0	0	0	0	4	3	5	1	3	0	3	0	0	0	0	0	0	2	2	0	0	5	6	0	0	4	0	2	0	0	10	0	99	0	3	1	14
ENSG00000186283	ENSG00000186283	TOR3A	torsin family 3 member A [Source:HGNC Symbol;Acc:HGNC:11997]	protein_coding	104	328	29	67	172	127	273	120	83	278	252	610	230	111	87	259	76	282	59	155	321	272	231	433	46	379	156	204	424	197	148	120	82	551	13	5	363	522	137	28	1	2	6	38	238
ENSG00000226292	ENSG00000226292	RPS3AP10	RPS3A pseudogene 10 [Source:HGNC Symbol;Acc:HGNC:36036]	processed_pseudogene	0	0	0	0	3	20	0	3	0	25	0	0	0	0	0	0	0	0	0	8	1	0	0	1	0	0	0	0	1	24	0	0	0	0	84	0	0	0	0	0	0	0	0	5	1
ENSG00000121481	ENSG00000121481	RNF2	ring finger protein 2 [Source:HGNC Symbol;Acc:HGNC:10061]	protein_coding	382	1101	150	225	1322	523	759	486	289	783	565	1736	532	642	449	404	289	1182	141	340	631	903	836	557	118	855	339	555	702	1039	351	581	220	1522	407	797	124	3	337	416	438	102	4474	7	13
ENSG00000117139	ENSG00000117139	KDM5B	lysine demethylase 5B [Source:HGNC Symbol;Acc:HGNC:18039]	protein_coding	433	556	91	124	735	733	701	262	504	836	280	1138	625	752	339	681	331	702	242	590	625	978	818	508	112	918	939	639	1054	1074	381	210	228	564	254	108	593	1743	335	477	359	8	150	120	84
ENSG00000143248	ENSG00000143248	RGS5	regulator of G protein signaling 5 [Source:HGNC Symbol;Acc:HGNC:10001]	protein_coding	84	246	92	15	805	8	302	51	78	237	120	297	574	37	140	55	103	32	81	51	706	159	209	34	37	98	111	67	691	57	254	25	104	25	287	11	284	374	361	47	1924	0	14	7	23
ENSG00000224810	ENSG00000224810		novel transcript (LOC149157)	lncRNA	0	0	0	2	0	8	0	0	1	26	0	3	0	1	0	0	1	1	0	1	0	6	0	0	2	9	0	6	0	0	0	0	0	0	0	0	0	0	0	0	3	1	25	12	0
ENSG00000162814	ENSG00000162814	SPATA17	spermatogenesis associated 17 [Source:HGNC Symbol;Acc:HGNC:25184]	protein_coding	3	56	2	23	46	32	15	12	17	28	0	15	0	4	56	1	8	16	1	37	9	16	10	19	29	5	9	39	33	28	13	13	1	22	34	174	12	48	72	1	3	21	2	10	21
ENSG00000225172	ENSG00000225172		novel transcript	lncRNA	1	5	1	0	8	35	0	1	2	6	0	0	0	1	2	0	3	1	3	9	0	45	2	1	23	2	4	1	4	34	3	0	0	1	10	7	0	3	9	3	0	0	0	7	4
ENSG00000261642	ENSG00000261642		novel transcript	lncRNA	0	0	0	1	4	5	1	1	1	2	0	0	0	2	3	0	0	2	0	3	0	2	1	3	2	0	1	10	2	0	7	0	0	2	1	0	3	1	0	0	0	0	0	19	12
ENSG00000228239	ENSG00000228239		novel transcript	lncRNA	0	9	0	32	0	36	0	12	1	0	0	0	0	3	9	0	0	9	2	26	0	38	0	0	0	0	2	6	2	17	0	0	0	13	0	1	1	0	3	25	0	0	0	1	1
ENSG00000116132	ENSG00000116132	PRRX1	paired related homeobox 1 [Source:HGNC Symbol;Acc:HGNC:9142]	protein_coding	123	17	130	1	1417	6	511	4	53	30	116	0	862	0	405	0	135	40	111	8	628	204	668	33	61	2	171	14	2094	6	1020	1	265	0	452	13	334	1	973	63	742	0	1	17	569
ENSG00000238042	ENSG00000238042	LINC02257	long intergenic non-protein coding RNA 2257 [Source:HGNC Symbol;Acc:HGNC:53159]	lncRNA	1	7	1	7	11	5	7	0	1	2	0	5	0	1	3	0	6	4	0	15	19	16	8	0	2	7	7	7	14	3	0	0	5	3	2	26	1	4	2	0	0	0	0	0	4
ENSG00000271475	ENSG00000271475		eukaryotic translation elongation factor 1 alpha 2 (EEF1A2) pseudogene	processed_pseudogene	0	4	0	1	0	0	0	0	0	23	0	0	0	0	6	0	0	8	0	4	0	0	0	0	1	6	0	0	0	6	0	0	0	0	0	0	0	3	0	0	0	0	0	18	6
ENSG00000231877	ENSG00000231877		novel transcript	lncRNA	1	2	0	9	15	1	0	0	1	5	0	1	0	0	4	0	0	6	1	5	1	3	12	3	5	3	5	1	2	0	5	0	0	3	2	7	0	1	1	0	0	0	0	23	0
ENSG00000116679	ENSG00000116679	IVNS1ABP	influenza virus NS1A binding protein [Source:HGNC Symbol;Acc:HGNC:16951]	protein_coding	7790	8331	2399	1491	9405	7046	18862	5164	3193	8552	3932	14968	6602	9144	2317	6568	2915	9770	1990	6868	3868	9072	6446	5290	650	13816	8670	7504	9659	16768	3571	6611	1636	18040	2446	6649	8588	4615	3922	7263	5433	2853	39	35	1150
ENSG00000228536	ENSG00000228536	LYPLAL1-AS1	LYPLAL1 antisense RNA 1 [Source:HGNC Symbol;Acc:HGNC:54054]	lncRNA	0	23	0	6	0	6	4	7	0	12	1	0	13	2	0	0	10	20	0	21	4	5	7	5	5	3	11	2	21	7	4	1	0	0	2	21	3	3	22	1	0	0	4	24	13
ENSG00000230550	ENSG00000230550	ERLNC1	estrogen receptor responsive lncRNA 1 [Source:HGNC Symbol;Acc:HGNC:41109]	lncRNA	6	13	7	0	45	24	15	1	8	40	9	10	33	31	8	1	13	22	3	10	20	5	48	5	5	0	10	20	103	36	24	0	9	4	119	1	0	1	10	0	122	1	0	29	4
ENSG00000253326	ENSG00000253326		novel pseudogene	processed_pseudogene	1	0	0	0	0	18	1	0	0	0	0	0	0	0	0	0	0	2	0	0	0	8	0	0	0	0	0	0	0	0	4	9	0	0	2	2	1	2	1	0	5	1	20	1	20
ENSG00000152092	ENSG00000152092	ASTN1	astrotactin 1 [Source:HGNC Symbol;Acc:HGNC:773]	protein_coding	0	19	15	8	3	30	3	9	2	105	0	12	1	2	39	1	2	47	17	52	8	57	5	25	8	19	3	19	3	97	41	0	0	15	116	4	7	7	115	10	6	3	9	51	74
ENSG00000234984	ENSG00000234984	FMO10P	flavin containing dimethylaniline monoxygenase 10, pseudogene [Source:HGNC Symbol;Acc:HGNC:32211]	unprocessed_pseudogene	0	4	0	2	0	0	1	1	0	2	0	0	0	0	21	0	0	35	0	19	0	38	0	11	2	2	0	6	3	2	0	2	0	0	2	1	0	0	0	1	0	0	0	7	1
ENSG00000231648	ENSG00000231648	LINC01698	long intergenic non-protein coding RNA 1698 [Source:HGNC Symbol;Acc:HGNC:52486]	lncRNA	0	13	1	2	3	16	2	20	8	2	0	14	1	0	14	0	2	2	0	10	3	16	26	2	5	9	2	32	0	14	0	3	3	6	51	2	9	2	23	1	0	5	60	5	5
ENSG00000229983	ENSG00000229983		novel transcript	lncRNA	1	0	5	9	20	11	2	6	1	2	0	0	0	1	3	0	3	7	0	8	6	3	9	2	0	4	7	9	10	0	3	0	1	5	5	28	5	1	11	0	0	0	4	0	11
ENSG00000215149	ENSG00000215149	KRT18P32	keratin 18 pseudogene 32 [Source:HGNC Symbol;Acc:HGNC:33401]	processed_pseudogene	0	0	0	2	1	0	0	0	0	0	0	0	1	0	0	0	0	0	0	0	0	0	2	8	0	0	0	0	0	0	0	0	0	0	1	1	0	0	1	0	1	0	0	19	5
ENSG00000225920	ENSG00000225920	RIMKLBP2	ribosomal modification protein rimK like family member B pseudogene 2 [Source:HGNC Symbol;Acc:HGNC:39163]	processed_pseudogene	6	13	1	18	40	32	1	1	12	27	1	6	5	1	15	5	13	7	0	12	2	16	11	8	19	3	18	10	1	39	29	0	1	28	164	0	9	1	14	31	0	0	3	1	5
ENSG00000143476	ENSG00000143476	DTL	denticleless E3 ubiquitin protein ligase homolog [Source:HGNC Symbol;Acc:HGNC:30288]	protein_coding	65	817	58	99	157	471	84	250	69	1000	159	461	291	700	0	182	23	555	20	415	135	187	547	1114	89	872	730	491	107	857	95	71	55	222	0	1105	90	312	13	344	0	1	9	45	307
ENSG00000121486	ENSG00000121486	TRMT1L	tRNA methyltransferase 1 like [Source:HGNC Symbol;Acc:HGNC:16782]	protein_coding	251	625	91	213	774	573	366	365	226	1049	562	872	601	318	111	348	158	1008	124	377	424	559	349	603	37	718	387	565	518	1029	306	344	155	836	0	502	327	1422	187	141	1970	1366	9	16	224
ENSG00000214837	ENSG00000214837	LINC01347	long intergenic non-protein coding RNA 1347 [Source:HGNC Symbol;Acc:HGNC:50566]	transcribed_unprocessed_pseudogene	4	6	0	23	18	24	0	4	7	15	3	8	0	7	18	6	5	10	3	26	5	74	20	0	7	8	14	15	5	31	15	18	3	11	68	7	7	7	27	0	4	0	26	24	31
ENSG00000057252	ENSG00000057252	SOAT1	sterol O-acyltransferase 1 [Source:HGNC Symbol;Acc:HGNC:11177]	protein_coding	266	383	164	72	751	98	402	124	181	244	251	655	464	375	197	145	206	327	104	219	297	494	350	147	64	276	128	215	513	465	282	156	158	359	53	9	282	1	656	660	0	1	52	31	31
ENSG00000225982	ENSG00000225982		novel transcript	lncRNA	2	0	0	0	1	0	0	0	0	1	0	0	0	1	0	0	0	8	0	2	0	90	0	0	0	2	0	7	0	0	0	0	0	0	2	1	0	1	3	0	0	0	4	35	8
ENSG00000237783	ENSG00000237783		ribosomal protein S2 (RPS2) pseudogene	processed_pseudogene	0	1	0	3	0	0	0	1	0	0	0	25	0	0	8	0	0	15	0	6	14	26	0	5	6	1	0	6	2	7	3	6	0	3	2	4	0	1	23	0	0	0	1	5	9
ENSG00000272906	ENSG00000272906		novel transcript, antisense to TOR1AIP1	lncRNA	38	21	33	14	73	19	72	9	24	31	27	28	104	30	121	12	19	26	17	2	147	41	138	9	5	15	20	13	327	5	48	20	24	26	144	0	48	1	137	4	0	0	5	8	11
ENSG00000123685	ENSG00000123685	BATF3	basic leucine zipper ATF-like transcription factor 3 [Source:HGNC Symbol;Acc:HGNC:28915]	protein_coding	34	58	25	14	64	55	61	49	32	34	53	130	25	58	6	25	18	86	15	81	71	79	49	45	16	42	26	43	44	81	42	134	18	193	58	5	90	128	12	159	2	87	0	0	8
ENSG00000224783	ENSG00000224783	MIPEPP2	mitochondrial intermediate peptidase pseudogene 2 [Source:HGNC Symbol;Acc:HGNC:39457]	processed_pseudogene	0	10	0	21	0	2	0	0	0	0	0	9	0	0	6	0	0	8	0	17	2	0	0	0	2	6	0	0	0	0	9	1	0	0	0	0	0	0	0	0	0	0	3	0	4
ENSG00000162852	ENSG00000162852	CNST	consortin, connexin sorting protein [Source:HGNC Symbol;Acc:HGNC:26486]	protein_coding	338	507	225	300	1559	742	535	482	217	785	451	1815	479	869	581	1244	289	620	370	303	754	975	1258	893	68	1104	684	716	1502	1193	128	160	211	1081	561	1171	744	888	787	596	2	161	16	36	351
ENSG00000232792	ENSG00000232792	FTH1P25	ferritin heavy chain 1 pseudogene 25 [Source:HGNC Symbol;Acc:HGNC:37643]	processed_pseudogene	0	1	0	0	0	2	0	11	1	0	0	9	0	0	0	0	0	10	0	8	0	7	0	0	0	0	0	0	5	2	0	2	4	3	0	0	0	0	0	0	0	0	0	0	1
ENSG00000273004	ENSG00000273004		novel transcript	lncRNA	2	8	2	4	0	17	29	0	3	14	4	5	3	4	0	22	0	7	0	5	2	13	8	4	0	4	4	7	16	11	11	5	5	17	0	50	9	0	14	7	2	0	0	6	1
ENSG00000143842	ENSG00000143842	SOX13	SRY-box transcription factor 13 [Source:HGNC Symbol;Acc:HGNC:11192]	protein_coding	25	58	13	29	120	76	40	14	31	76	9	63	25	17	29	24	29	38	11	33	127	82	67	44	11	23	40	37	131	97	65	7	9	30	104	16	25	6	105	4	15	2	107	51	65
ENSG00000116962	ENSG00000116962	NID1	nidogen 1 [Source:HGNC Symbol;Acc:HGNC:7821]	protein_coding	107	86	54	66	262	213	475	65	103	188	261	5	623	185	550	2	206	26	39	59	791	154	559	190	52	132	72	66	1968	32	322	37	143	100	89	12	331	6	1793	9	399	4	11	165	44
ENSG00000288078	ENSG00000288078		novel transcript	lncRNA	0	3	0	6	0	11	0	17	0	11	0	4	0	3	2	0	0	0	0	31	13	46	1	2	4	3	0	15	0	0	0	1	0	0	0	0	12	0	0	0	0	0	5	0	0
ENSG00000232679	ENSG00000232679	LINC01705	long intergenic non-protein coding RNA 1705 [Source:HGNC Symbol;Acc:HGNC:52493]	lncRNA	1	26	0	1	7	17	1	2	3	1	0	0	0	0	0	0	1	11	0	15	14	16	5	0	13	8	1	6	12	25	0	3	0	0	8	3	0	1	10	0	0	0	0	10	8
ENSG00000159388	ENSG00000159388	BTG2	BTG anti-proliferation factor 2 [Source:HGNC Symbol;Acc:HGNC:1131]	protein_coding	6608	1377	2277	513	10880	1343	15132	830	5540	1897	4164	5386	10524	1129	4223	3207	2809	2552	2656	1261	6738	1912	7236	3637	595	2250	3639	1805	11342	3249	5932	2332	1809	5203	3783	5444	10035	994	6761	1238	6294	2557	33	1	1958
ENSG00000220749	ENSG00000220749	RPL21P28	ribosomal protein L21 pseudogene 28 [Source:HGNC Symbol;Acc:HGNC:36258]	processed_pseudogene	119	220	97	88	291	202	225	113	44	223	123	592	115	191	105	172	78	250	44	110	212	209	235	221	32	191	132	197	338	256	89	76	80	518	70	96	90	149	89	34	97	120	223	89	20
ENSG00000181450	ENSG00000181450	ZNF678	zinc finger protein 678 [Source:HGNC Symbol;Acc:HGNC:28652]	protein_coding	41	86	53	42	304	163	122	49	41	30	18	136	155	15	100	156	6	54	43	109	183	177	139	82	20	100	26	94	10	112	1	14	31	67	6	16	6	2	96	2	2	68	3	60	25
ENSG00000223519	ENSG00000223519	KIF28P	kinesin family member 28, pseudogene [Source:HGNC Symbol;Acc:HGNC:49205]	transcribed_unitary_pseudogene	3	27	13	30	176	42	42	28	8	162	31	37	22	38	29	74	11	33	8	41	22	136	64	63	13	54	23	47	76	94	28	18	33	74	45	77	144	4	139	64	0	1	81	105	90
ENSG00000120333	ENSG00000120333	MRPS14	mitochondrial ribosomal protein S14 [Source:HGNC Symbol;Acc:HGNC:14049]	protein_coding	580	861	214	217	1325	598	913	486	572	833	1093	1927	1027	782	443	586	352	963	338	438	1556	884	968	713	106	884	767	718	1966	841	726	433	300	1467	371	286	453	878	1107	609	1130	1338	4183	977	487
ENSG00000286285	ENSG00000286285		novel transcript	lncRNA	4	8	0	0	3	49	0	0	2	0	0	1	20	3	12	8	6	0	0	5	1	69	3	0	2	1	1	10	0	0	1	0	3	2	0	0	6	2	9	0	0	0	9	39	6
ENSG00000225300	ENSG00000225300		novel transcript	lncRNA	0	1	0	10	1	20	0	0	0	3	0	0	1	0	2	0	0	31	0	2	2	0	0	0	0	8	0	17	0	0	0	0	0	2	0	4	0	1	0	0	0	0	7	24	5
ENSG00000162753	ENSG00000162753	SLC9C2	solute carrier family 9 member C2 (putative) [Source:HGNC Symbol;Acc:HGNC:28664]	protein_coding	12	43	17	21	10	12	60	17	21	33	15	2	7	5	24	2	9	35	6	78	15	80	19	10	7	19	27	15	21	37	19	25	3	16	37	11	1	3	11	14	0	0	0	24	36
ENSG00000231424	ENSG00000231424		novel transcript, antisense to FMO1	lncRNA	1	8	1	17	56	16	12	3	4	0	19	1	2	5	7	34	2	34	4	29	6	10	7	5	13	8	3	9	32	16	11	6	2	12	13	2	0	0	15	0	1	1	1	24	33
ENSG00000143355	ENSG00000143355	LHX9	LIM homeobox 9 [Source:HGNC Symbol;Acc:HGNC:14222]	protein_coding	6	14	6	16	6	8	3	3	5	56	0	0	11	1	58	0	0	25	5	38	40	23	10	2	9	1	12	8	45	1	10	2	11	11	140	10	6	16	70	2	4	0	2	51	27
ENSG00000287177	ENSG00000287177		novel transcript	lncRNA	0	0	0	2	10	0	0	2	2	26	0	0	0	0	2	0	0	27	2	50	2	0	9	2	3	3	0	12	2	11	1	1	4	9	0	2	1	2	7	1	0	1	0	27	21
ENSG00000223490	ENSG00000223490	CHCHD2P5	coiled-coil-helix-coiled-coil-helix domain containing 2 pseudogene 5 [Source:HGNC Symbol;Acc:HGNC:39589]	processed_pseudogene	0	14	0	9	0	0	0	0	0	3	0	0	0	0	2	0	4	24	0	13	0	7	2	11	4	7	1	1	38	0	0	2	0	0	0	0	0	0	3	0	1	0	0	0	2
ENSG00000121644	ENSG00000121644	DESI2	desumoylating isopeptidase 2 [Source:HGNC Symbol;Acc:HGNC:24264]	protein_coding	434	995	218	311	651	497	841	564	274	826	593	1970	1370	587	439	710	252	852	201	305	1145	374	1167	601	93	769	369	500	2140	848	786	281	240	1080	1	15	471	79	202	392	1387	816	4	18	35
ENSG00000174502	ENSG00000174502	SLC26A9	solute carrier family 26 member 9 [Source:HGNC Symbol;Acc:HGNC:14469]	protein_coding	0	10	18	34	8	57	1	9	6	36	0	3	94	8	4	1	6	47	11	20	6	17	6	55	4	26	16	44	22	95	11	23	9	17	154	83	18	44	29	5	21	6	118	56	74
ENSG00000224286	ENSG00000224286	LINC01142	long intergenic non-protein coding RNA 1142 [Source:HGNC Symbol;Acc:HGNC:49456]	lncRNA	0	6	0	3	0	9	0	0	14	9	0	10	2	0	12	2	1	10	0	17	6	12	3	10	5	9	3	15	2	7	3	1	0	1	32	1	20	0	2	0	0	0	43	24	3
ENSG00000158715	ENSG00000158715	SLC45A3	solute carrier family 45 member 3 [Source:HGNC Symbol;Acc:HGNC:8642]	protein_coding	0	10	0	2	42	36	10	2	1	15	0	11	21	2	9	28	7	15	2	16	6	16	23	2	3	33	3	5	0	43	1	2	6	1	14	39	1	11	27	0	0	1	103	17	59
ENSG00000143195	ENSG00000143195	ILDR2	immunoglobulin like domain containing receptor 2 [Source:HGNC Symbol;Acc:HGNC:18131]	protein_coding	4	56	5	17	56	68	0	10	5	74	0	16	3	1	26	14	1	25	1	61	10	134	9	1	15	20	18	24	16	34	9	2	2	4	7	34	40	10	51	2	10	3	23	106	91
ENSG00000162849	ENSG00000162849	KIF26B	kinesin family member 26B [Source:HGNC Symbol;Acc:HGNC:25484]	protein_coding	0	4	17	2	2	22	27	1	5	5	0	4	32	5	66	1	9	29	0	21	101	164	9	2	5	4	13	23	137	65	13	14	3	2	14	49	24	4	14	12	1	1	56	164	99
ENSG00000234142	ENSG00000234142	LINC01675	long intergenic non-protein coding RNA 1675 [Source:HGNC Symbol;Acc:HGNC:52463]	lncRNA	0	8	4	4	7	4	0	0	0	5	0	0	0	0	1	0	0	5	1	29	8	27	7	1	11	1	0	0	1	4	1	0	0	0	0	0	2	0	0	2	0	1	0	9	7
ENSG00000067533	ENSG00000067533	RRP15	ribosomal RNA processing 15 homolog [Source:HGNC Symbol;Acc:HGNC:24255]	protein_coding	75	168	40	153	265	124	86	74	80	230	82	409	207	98	54	108	56	300	23	169	173	302	320	379	43	226	62	224	258	244	69	149	35	297	262	32	71	108	154	198	54	342	306	7	16
ENSG00000270443	ENSG00000270443		NOP10 ribonucleoprotein (NOP10) pseudogene	processed_pseudogene	0	4	2	2	5	9	0	1	1	6	0	0	0	0	4	0	6	6	0	6	8	1	8	12	1	11	9	3	1	1	1	0	0	0	0	1	7	0	3	0	0	0	0	0	13
ENSG00000116209	ENSG00000116209	TMEM59	transmembrane protein 59 [Source:HGNC Symbol;Acc:HGNC:1239]	protein_coding	1830	1408	691	381	2943	1099	3221	1040	818	1476	1238	2939	2257	2119	1135	909	906	1348	710	777	2909	1579	3547	1780	237	1987	960	1027	3756	2224	1489	740	978	3117	1720	1670	2325	1187	2023	1708	4314	1491	6814	2886	2019
ENSG00000271811	ENSG00000271811		novel transcript	lncRNA	0	5	1	1	17	1	0	4	2	20	0	0	0	1	16	0	3	13	0	12	3	6	2	0	0	1	3	6	31	1	2	4	1	1	2	0	1	0	4	0	0	0	0	18	14
ENSG00000235492	ENSG00000235492	LINC01221	long intergenic non-protein coding RNA 1221 [Source:HGNC Symbol;Acc:HGNC:49671]	lncRNA	0	0	0	1	0	0	0	3	8	0	0	0	0	0	6	0	0	20	0	13	0	13	7	0	5	0	4	13	0	0	0	0	4	0	0	0	0	0	0	0	0	0	0	0	1
ENSG00000287808	ENSG00000287808	DHX9-AS1	DHX9 antisense RNA 1 [Source:HGNC Symbol;Acc:HGNC:56097]	lncRNA	36	79	15	11	49	49	43	56	29	83	38	97	37	52	11	61	8	67	17	45	31	56	72	49	9	82	46	65	82	71	12	25	9	87	32	0	43	72	31	22	0	63	31	0	5
ENSG00000116161	ENSG00000116161	CACYBP	calcyclin binding protein [Source:HGNC Symbol;Acc:HGNC:30423]	protein_coding	943	2930	294	895	1419	1504	1495	1491	574	2260	700	2404	1445	3949	653	1462	354	2392	334	844	1696	1928	1658	2030	118	2293	1185	2745	2318	2325	860	642	327	2947	397	2170	1054	1963	1169	2055	3507	4408	20754	3571	803
ENSG00000286210	ENSG00000286210		novel transcript	lncRNA	0	5	0	0	1	1	0	3	5	1	0	1	0	2	0	0	0	10	0	3	4	32	2	0	0	17	1	20	0	24	0	0	0	0	1	0	0	0	2	4	0	0	14	37	5
ENSG00000260698	ENSG00000260698		novel transcript	lncRNA	0	21	0	0	0	10	0	2	1	19	1	0	2	0	1	0	0	24	2	35	0	0	0	1	0	13	2	11	0	12	0	3	1	3	3	3	2	0	2	0	0	0	29	2	11
ENSG00000277007	ENSG00000277007		novel transcript	lncRNA	0	14	0	20	1	34	1	1	7	0	0	0	0	0	4	0	8	17	0	20	0	1	5	3	1	9	6	24	13	14	4	0	0	0	9	10	0	0	1	0	0	3	9	0	3
ENSG00000077157	ENSG00000077157	PPP1R12B	protein phosphatase 1 regulatory subunit 12B [Source:HGNC Symbol;Acc:HGNC:7619]	protein_coding	416	238	127	118	1670	156	433	48	150	90	234	253	274	79	180	92	151	95	104	180	1491	231	550	137	74	288	119	167	1061	411	334	60	101	188	110	86	349	206	503	2	1856	1	143	110	75
ENSG00000152104	ENSG00000152104	PTPN14	protein tyrosine phosphatase non-receptor type 14 [Source:HGNC Symbol;Acc:HGNC:9647]	protein_coding	27	112	22	58	307	54	79	79	64	236	79	38	140	38	315	15	98	126	24	141	108	150	314	34	41	60	31	90	335	224	74	33	27	88	163	70	87	7	85	52	3	8	97	152	143
ENSG00000236975	ENSG00000236975	LINC02814	long intergenic non-protein coding RNA 2814 [Source:HGNC Symbol;Acc:HGNC:54346]	lncRNA	0	0	2	0	12	4	0	3	2	6	0	1	0	1	0	0	3	10	2	13	20	1	2	4	1	2	0	5	2	3	3	1	0	0	3	24	0	1	20	1	3	0	3	58	17
ENSG00000117650	ENSG00000117650	NEK2	NIMA related kinase 2 [Source:HGNC Symbol;Acc:HGNC:7745]	protein_coding	56	462	27	63	102	239	21	274	94	457	160	170	76	361	97	215	54	361	12	123	51	154	341	369	83	527	175	426	78	544	91	69	24	55	11	2	86	564	30	99	0	334	28	9	10
ENSG00000235021	ENSG00000235021		novel transcript	lncRNA	0	4	0	9	0	1	0	5	2	4	0	4	0	0	12	0	1	3	1	2	0	21	2	2	1	1	0	3	2	0	0	0	0	0	7	4	2	0	2	0	0	0	0	4	9
ENSG00000203724	ENSG00000203724	C1orf53	chromosome 1 open reading frame 53 [Source:HGNC Symbol;Acc:HGNC:30003]	protein_coding	11	14	8	11	1	12	9	6	8	11	16	96	2	21	0	2	9	24	4	7	16	6	30	7	2	11	3	6	31	16	10	2	9	53	0	280	0	77	10	15	2	0	0	0	31
ENSG00000158764	ENSG00000158764	ITLN2	intelectin 2 [Source:HGNC Symbol;Acc:HGNC:20599]	protein_coding	26	5	42	0	15	6	129	2	19	17	0	0	16	0	21	7	11	5	27	10	79	5	94	21	9	10	16	4	58	39	76	3	66	25	10	38	1	1	214	9	624	0	53	7	8
ENSG00000261065	ENSG00000261065		novel transcript	lncRNA	17	18	2	7	102	20	68	2	5	76	30	27	80	70	27	0	21	24	6	3	62	4	103	0	4	14	33	1	160	2	35	6	17	7	147	2	2	0	42	0	336	0	0	23	3
ENSG00000260855	ENSG00000260855		novel transcript	lncRNA	1	7	0	9	11	0	1	3	0	5	0	26	1	2	0	0	5	6	6	4	0	9	1	11	0	5	2	27	0	8	2	0	0	5	2	11	22	2	8	0	2	0	4	2	5
ENSG00000188783	ENSG00000188783	PRELP	proline and arginine rich end leucine rich repeat protein [Source:HGNC Symbol;Acc:HGNC:9357]	protein_coding	252	20	232	32	1741	25	507	11	205	37	232	17	1311	19	371	38	158	36	96	32	1234	63	1233	24	81	10	139	42	2804	111	421	9	163	25	1491	10	712	0	1923	12	1461	1	26	47	341
ENSG00000236206	ENSG00000236206		novel transcript	lncRNA	0	9	0	0	2	8	0	3	0	9	0	0	0	0	0	0	4	3	0	16	0	33	4	1	8	7	1	2	0	17	0	3	0	1	22	3	0	0	0	0	0	0	0	2	6
ENSG00000168118	ENSG00000168118	RAB4A	RAB4A, member RAS oncogene family [Source:HGNC Symbol;Acc:HGNC:9781]	protein_coding	705	1417	475	660	1947	1297	1475	1052	356	1667	489	2301	1307	1358	788	1453	414	1273	521	497	1582	1353	1998	1935	425	2303	493	678	2292	1785	581	361	538	2443	927	1431	1112	1256	1611	1151	3100	1311	10	81	132
ENSG00000173726	ENSG00000173726	TOMM20	translocase of outer mitochondrial membrane 20 [Source:HGNC Symbol;Acc:HGNC:20947]	protein_coding	496	843	160	224	1026	567	598	304	173	527	389	1773	497	818	379	429	190	792	197	251	1097	515	828	351	89	431	310	346	966	642	391	287	254	1020	405	266	572	570	631	296	4	158	12	29	53
ENSG00000282852	ENSG00000282852		cytochrome c oxidase assembly factor 5 (COA5) pseudogene	processed_pseudogene	0	0	0	0	0	4	0	0	3	35	0	0	0	1	2	0	13	6	0	23	0	0	3	4	0	0	4	2	0	7	1	3	0	2	0	0	0	0	0	0	0	0	2	0	1
ENSG00000152382	ENSG00000152382	TADA1	transcriptional adaptor 1 [Source:HGNC Symbol;Acc:HGNC:30631]	protein_coding	98	366	27	95	301	57	173	150	167	352	110	495	230	439	98	254	42	230	56	169	119	396	413	458	14	450	205	264	303	407	143	102	72	571	26	10	62	388	107	338	0	444	0	22	473
ENSG00000143839	ENSG00000143839	REN	renin [Source:HGNC Symbol;Acc:HGNC:9958]	protein_coding	0	4	1	6	11	5	0	2	1	0	0	0	0	0	2	0	3	8	0	8	2	25	0	2	1	3	0	8	6	19	3	5	0	0	16	8	3	175	3	0	0	7	63	16	16
ENSG00000232100	ENSG00000232100	LINC01653	long intergenic non-protein coding RNA 1653 [Source:HGNC Symbol;Acc:HGNC:52441]	lncRNA	2	18	1	6	10	1	2	9	1	0	0	5	0	1	32	0	8	4	6	25	2	10	7	14	8	2	10	28	9	10	8	12	0	11	43	0	4	1	35	0	4	19	0	20	4
ENSG00000261024	ENSG00000261024	GS1-279B7.1	microtubule associated protein 1 light chain 3 beta pseudogene [Source:NCBI gene (formerly Entrezgene);Acc:100288079]	transcribed_processed_pseudogene	0	13	0	4	3	16	0	10	9	31	0	0	0	0	13	0	1	1	5	12	10	23	6	11	9	15	7	13	5	7	1	3	2	14	56	3	1	15	10	2	0	0	5	4	5
ENSG00000229703	ENSG00000229703	LYPD9P	LY6/PLAUR domain containing 9, pseudogene [Source:HGNC Symbol;Acc:HGNC:53735]	transcribed_unitary_pseudogene	1	1	0	0	0	3	2	0	4	0	0	0	0	1	4	0	2	3	0	14	0	8	4	0	2	7	1	6	1	17	6	1	2	0	0	4	2	3	12	0	1	0	10	41	13
ENSG00000176754	ENSG00000176754	LINC00303	long intergenic non-protein coding RNA 303 [Source:HGNC Symbol;Acc:HGNC:26865]	lncRNA	1	12	2	24	7	3	0	1	0	13	0	1	0	0	0	0	0	39	0	20	10	31	4	1	4	8	2	8	5	6	5	4	1	0	17	4	4	0	1	0	0	0	14	15	10
ENSG00000227953	ENSG00000227953	LINC01341	long intergenic non-protein coding RNA 1341 [Source:HGNC Symbol;Acc:HGNC:49457]	lncRNA	1	15	12	29	168	65	40	29	6	136	15	38	19	32	23	75	13	28	9	38	35	94	38	59	17	48	23	50	80	71	32	14	26	75	33	77	136	3	163	53	0	0	18	114	119
ENSG00000135829	ENSG00000135829	DHX9	DExH-box helicase 9 [Source:HGNC Symbol;Acc:HGNC:2750]	protein_coding	798	2395	312	445	1200	1429	830	978	838	2111	1004	2659	1115	1437	660	1048	253	1817	318	1012	1352	1579	1720	1017	214	1881	1287	1477	1774	2987	392	583	264	2461	831	25	1178	2489	847	1050	5	2282	101	47	114
ENSG00000134717	ENSG00000134717	BTF3L4	basic transcription factor 3 like 4 [Source:HGNC Symbol;Acc:HGNC:30547]	protein_coding	1120	2036	432	633	1835	1633	1711	811	734	1805	1113	2978	1372	1539	622	1296	255	1579	417	766	1861	2127	1880	1277	225	1208	905	1705	2811	2087	779	894	533	3847	741	956	1039	1111	1242	1593	528	2577	1183	1760	414
ENSG00000116668	ENSG00000116668	SWT1	SWT1 RNA endoribonuclease homolog [Source:HGNC Symbol;Acc:HGNC:16785]	protein_coding	212	129	41	93	49	165	334	175	164	99	144	218	132	191	45	189	28	310	53	192	46	180	419	153	24	196	73	77	444	424	166	94	30	276	97	1536	75	89	141	145	2	0	11	36	15
ENSG00000143756	ENSG00000143756	FBXO28	F-box protein 28 [Source:HGNC Symbol;Acc:HGNC:29046]	protein_coding	686	1323	225	199	1167	440	661	391	246	1066	880	1490	757	785	397	364	249	857	219	412	700	923	856	767	114	717	421	549	1665	662	281	348	207	974	12	111	213	1	466	176	1646	0	32	109	20
ENSG00000278180	ENSG00000278180		FAM166A, pseudogene 5	unprocessed_pseudogene	0	0	0	0	0	1	3	0	0	9	0	0	0	0	8	0	0	1	0	0	5	0	0	2	0	0	0	0	0	0	0	0	0	0	3	3	1	1	1	0	0	0	0	27	12
ENSG00000143702	ENSG00000143702	CEP170	centrosomal protein 170 [Source:HGNC Symbol;Acc:HGNC:28920]	protein_coding	273	769	100	138	560	473	454	287	221	420	26	598	374	522	153	602	65	595	109	249	568	421	709	190	106	579	359	393	919	625	91	145	100	433	299	9	183	457	445	247	1	95	8	53	157
ENSG00000287676	ENSG00000287676		novel transcript	lncRNA	0	0	0	0	0	3	2	1	0	0	0	0	0	0	1	31	0	0	5	1	0	15	0	0	1	0	0	0	1	0	0	1	0	0	0	5	0	0	0	0	0	0	0	6	2
ENSG00000143207	ENSG00000143207	COP1	COP1 E3 ubiquitin ligase [Source:HGNC Symbol;Acc:HGNC:17440]	protein_coding	1884	1902	671	401	2626	908	3706	1075	1206	2042	1204	2876	1855	1410	832	1423	892	2155	714	1134	1504	1925	2221	1002	204	2194	1901	2007	2631	2350	1211	1147	687	3347	133	1752	1423	1438	1205	1468	138	3616	5902	52	630
ENSG00000122176	ENSG00000122176	FMOD	fibromodulin [Source:HGNC Symbol;Acc:HGNC:3774]	protein_coding	120	11	126	5	705	68	429	8	94	7	162	10	608	2	426	0	131	51	50	75	811	38	853	5	66	41	233	41	1063	40	401	23	164	23	23	13	285	46	743	123	2	0	14	46	22
ENSG00000227230	ENSG00000227230		novel transcript	lncRNA	10	36	0	8	6	23	22	10	5	27	0	43	11	14	0	40	2	11	2	31	42	21	50	15	12	18	15	14	51	22	2	12	0	9	5	1	6	41	18	25	0	0	0	5	1
ENSG00000236230	ENSG00000236230		novel transcript	lncRNA	1	37	11	17	3	19	0	10	8	18	0	0	0	4	46	11	24	68	1	46	8	41	8	23	14	2	18	19	37	17	4	7	2	2	10	25	29	4	66	0	1	0	0	9	26
ENSG00000026751	ENSG00000026751	SLAMF7	SLAM family member 7 [Source:HGNC Symbol;Acc:HGNC:21394]	protein_coding	2	10	10	42	278	98	71	0	42	70	342	3487	557	274	106	48	79	379	27	453	99	210	64	232	29	171	118	197	272	628	186	531	38	729	9	444	267	240	16	349	0	670	0	11	271
ENSG00000150681	ENSG00000150681	RGS18	regulator of G protein signaling 18 [Source:HGNC Symbol;Acc:HGNC:14261]	protein_coding	6239	3702	2781	2248	8623	6097	8317	4330	3684	9558	3276	6143	4828	3664	1656	9205	2876	5408	2750	1906	4622	5954	8081	8045	1766	11470	3426	6301	10950	13508	3023	3039	2239	11795	2208	7362	4756	2379	12528	1653	4420	4933	4215	1396	695
ENSG00000116906	ENSG00000116906	GNPAT	glyceronephosphate O-acyltransferase [Source:HGNC Symbol;Acc:HGNC:4416]	protein_coding	764	1762	278	454	1356	810	1077	962	564	2271	646	2386	1005	1206	469	1091	244	1477	291	713	1181	1263	981	1309	186	1849	852	1505	1887	1364	455	552	252	1978	221	579	567	1264	533	1426	24	2508	66	5	367
ENSG00000092969	ENSG00000092969	TGFB2	transforming growth factor beta 2 [Source:HGNC Symbol;Acc:HGNC:11768]	protein_coding	13	7	5	7	24	15	18	16	35	33	1	57	13	1	15	22	9	56	12	46	86	60	61	26	5	27	33	49	103	1	82	2	8	16	252	23	25	2	30	24	1	3	42	163	34
ENSG00000157181	ENSG00000157181	ODR4	odr-4 GPCR localization factor homolog [Source:HGNC Symbol;Acc:HGNC:24299]	protein_coding	32	161	69	81	161	70	193	50	102	283	89	157	275	109	99	74	47	218	55	106	220	114	237	131	14	201	77	103	271	211	64	62	28	318	3	0	104	216	109	103	961	0	39	10	415
ENSG00000250762	ENSG00000250762		chromosome 14 open reading frame 24 (C14orf24) pseudogene	unprocessed_pseudogene	0	2	0	1	10	3	3	1	5	5	0	0	5	2	10	0	2	6	2	4	2	7	0	9	7	1	7	6	2	1	9	0	0	1	0	0	0	1	0	1	11	0	6	2	10
ENSG00000227240	ENSG00000227240		novel transcript	lncRNA	0	8	0	2	7	4	3	4	5	0	0	1	0	0	2	0	2	7	1	20	1	7	7	8	8	3	1	5	13	32	2	5	4	12	9	6	19	0	5	0	0	0	1	7	7
ENSG00000076258	ENSG00000076258	FMO4	flavin containing dimethylaniline monoxygenase 4 [Source:HGNC Symbol;Acc:HGNC:3772]	protein_coding	12	82	3	0	67	70	50	18	13	12	66	140	40	26	53	24	13	55	33	40	271	93	66	43	5	18	96	51	174	10	64	8	12	31	189	1	0	2	76	51	0	1	0	9	2
ENSG00000286073	ENSG00000286073		SLAM family member 5-like pseudogene	unprocessed_pseudogene	0	0	0	5	5	0	0	0	0	2	0	1	0	0	2	0	0	6	0	12	1	0	0	0	0	8	3	1	0	5	1	0	1	24	1	2	3	0	0	1	0	0	0	0	4
ENSG00000231084	ENSG00000231084	RPL22P24	ribosomal protein L22 pseudogene 24 [Source:HGNC Symbol;Acc:HGNC:53758]	processed_pseudogene	4	28	4	8	0	26	5	18	1	22	9	15	48	3	18	19	6	2	14	48	38	11	31	29	0	11	3	22	41	38	7	4	2	22	0	1	0	0	10	39	0	0	6	5	0
ENSG00000232085	ENSG00000232085		novel transcript, antisense to CEP170	lncRNA	10	37	4	8	15	20	22	15	11	37	2	19	24	15	1	22	3	4	2	8	55	12	39	9	0	16	27	21	43	12	3	6	6	13	0	0	14	43	35	36	0	0	0	0	0
ENSG00000117697	ENSG00000117697	NSL1	NSL1 component of MIS12 kinetochore complex [Source:HGNC Symbol;Acc:HGNC:24548]	protein_coding	778	1213	243	311	790	714	973	777	561	1071	648	1559	730	874	461	566	330	1140	322	558	1125	833	1035	751	171	897	755	887	967	1229	457	444	292	1440	326	611	486	626	617	522	2023	1183	22	75	241
ENSG00000279333	ENSG00000279333		novel transcript	TEC	0	0	0	0	4	2	0	0	0	4	0	0	0	0	1	2	0	6	0	13	13	0	0	1	1	0	0	1	0	0	0	0	0	0	2	1	2	1	1	0	8	0	0	7	15
ENSG00000162669	ENSG00000162669	HFM1	helicase for meiosis 1 [Source:HGNC Symbol;Acc:HGNC:20193]	protein_coding	1	17	0	13	26	31	0	25	9	25	0	0	0	0	9	8	4	10	1	63	8	38	40	2	14	11	8	22	54	32	6	3	0	0	35	6	2	9	17	37	2	0	2	8	9
ENSG00000197067	ENSG00000197067	OR2T32P	olfactory receptor family 2 subfamily T member 32 pseudogene [Source:HGNC Symbol;Acc:HGNC:31254]	transcribed_unprocessed_pseudogene	0	2	0	10	3	6	0	3	1	0	0	2	0	0	0	7	2	8	0	4	0	57	0	2	1	0	1	11	7	10	0	0	0	11	4	6	1	10	2	0	10	0	0	0	2
ENSG00000132681	ENSG00000132681	ATP1A4	ATPase Na+/K+ transporting subunit alpha 4 [Source:HGNC Symbol;Acc:HGNC:14073]	protein_coding	1	9	1	16	42	34	5	13	7	42	0	1	4	10	31	0	5	16	1	47	10	92	4	38	20	20	3	24	6	44	9	0	1	10	7	17	18	13	12	2	4	0	69	62	65
ENSG00000143641	ENSG00000143641	GALNT2	polypeptide N-acetylgalactosaminyltransferase 2 [Source:HGNC Symbol;Acc:HGNC:4124]	protein_coding	35	123	28	48	119	153	117	76	42	114	0	359	67	38	133	34	67	200	36	94	110	241	227	164	15	64	55	165	291	144	102	58	65	229	260	548	111	11	129	187	9	1	97	83	211
ENSG00000227630	ENSG00000227630	LINC01132	long intergenic non-protein coding RNA 1132 [Source:HGNC Symbol;Acc:HGNC:49444]	lncRNA	0	3	0	2	33	73	0	7	1	8	0	0	53	0	0	0	3	59	2	25	6	163	0	14	3	20	12	19	16	9	2	1	0	5	18	6	11	1	0	9	1	0	73	22	23
ENSG00000228830	ENSG00000228830		novel transcript	lncRNA	86	167	26	35	177	116	140	82	104	394	103	296	245	241	73	243	61	177	41	73	228	167	333	187	44	229	300	296	468	199	109	80	37	235	6	0	86	151	97	83	14	7	8	0	8
ENSG00000010932	ENSG00000010932	FMO1	flavin containing dimethylaniline monoxygenase 1 [Source:HGNC Symbol;Acc:HGNC:3769]	protein_coding	9	10	11	1	143	3	56	14	7	27	57	2	130	17	145	4	1	11	16	59	175	44	45	10	14	11	33	22	545	1	48	0	39	7	6	12	75	4	226	53	3	6	29	30	23
ENSG00000282849	ENSG00000282849		novel transcript	lncRNA	0	6	1	0	0	0	0	2	1	19	0	28	0	0	14	1	2	21	0	0	0	6	0	16	14	3	4	1	5	7	3	0	0	0	56	0	3	0	10	0	0	0	0	0	1
ENSG00000226640	ENSG00000226640		novel transcript	lncRNA	0	2	0	3	5	3	1	3	3	2	0	0	0	0	7	0	3	6	0	3	4	15	5	5	9	11	2	15	4	0	0	0	0	0	4	1	1	0	0	0	0	0	0	0	4
ENSG00000010072	ENSG00000010072	SPRTN	SprT-like N-terminal domain [Source:HGNC Symbol;Acc:HGNC:25356]	protein_coding	234	478	92	96	249	260	157	178	157	320	200	407	329	215	101	117	46	282	44	171	435	151	263	137	8	126	152	236	252	517	196	129	90	292	290	4	159	341	224	359	434	0	0	60	26
ENSG00000135766	ENSG00000135766	EGLN1	egl-9 family hypoxia inducible factor 1 [Source:HGNC Symbol;Acc:HGNC:1232]	protein_coding	3200	1572	810	382	2551	1627	4121	1283	2566	2355	1492	2759	4121	2239	1272	1788	928	2299	787	1066	1709	1809	3508	2004	324	2435	1594	2295	3661	2775	1801	1137	763	4093	1265	3591	2225	1368	1121	763	3791	314	130	122	748
ENSG00000232626	ENSG00000232626		FK506 binding protein 8, 38kDa (FKBP8) pseudogene	transcribed_processed_pseudogene	1	21	0	11	14	9	1	2	1	42	0	2	0	1	1	0	8	16	0	17	10	11	8	15	3	15	3	20	29	14	12	1	0	1	114	2	6	3	4	2	5	1	0	27	42
ENSG00000279261	ENSG00000279261	LINC02961	long intergenic non-protein coding RNA 2961 [Source:HGNC Symbol;Acc:HGNC:55986]	lncRNA	0	3	0	2	3	6	2	1	0	12	0	1	0	2	4	0	0	0	0	17	1	0	1	9	5	2	0	16	2	32	1	6	0	3	2	6	1	0	11	0	0	1	14	26	1
ENSG00000213051	ENSG00000213051	RPL5P5	ribosomal protein L5 pseudogene 5 [Source:HGNC Symbol;Acc:HGNC:35564]	processed_pseudogene	1	10	1	1	9	8	1	8	1	20	2	0	1	0	14	0	3	2	3	19	2	27	8	3	27	4	17	16	1	8	3	12	0	8	3	1	0	6	28	1	0	0	17	3	1
ENSG00000238054	ENSG00000238054		novel transcript	lncRNA	0	3	5	0	32	9	0	1	0	3	1	0	3	2	5	1	0	0	0	14	0	0	0	6	3	0	0	0	0	0	0	3	0	0	0	3	1	0	1	0	1	0	0	3	3
ENSG00000163534	ENSG00000163534	FCRL1	Fc receptor like 1 [Source:HGNC Symbol;Acc:HGNC:18509]	protein_coding	113	61	24	26	209	124	109	81	80	73	0	80	125	2	34	2	25	304	27	20	201	111	98	26	4	121	45	20	147	209	22	60	23	163	1	2	58	3	25	115	0	586	4	7	195
ENSG00000168243	ENSG00000168243	GNG4	G protein subunit gamma 4 [Source:HGNC Symbol;Acc:HGNC:4407]	protein_coding	4	12	21	7	156	2	19	15	3	15	0	1	70	4	8	1	2	6	22	25	43	23	4	0	5	1	2	19	4	0	60	6	0	21	6	11	2	1	3	3	2	1	0	50	24
ENSG00000281453	ENSG00000281453	TGFB2-OT1	TGFB2 overlapping transcript 1 [Source:HGNC Symbol;Acc:HGNC:50629]	lncRNA	0	3	2	3	5	0	3	5	13	0	0	23	0	0	0	0	2	9	3	15	23	10	21	8	4	1	3	8	0	0	18	0	6	0	122	4	17	0	9	0	0	2	1	0	18
ENSG00000224939	ENSG00000224939	LINC00184	long intergenic non-protein coding RNA 184 [Source:HGNC Symbol;Acc:HGNC:37192]	lncRNA	0	0	4	1	0	0	0	0	7	7	0	0	0	0	2	0	0	11	0	18	0	1	0	10	5	25	2	9	2	2	4	0	5	0	59	5	1	0	1	0	0	0	0	7	6
ENSG00000116183	ENSG00000116183	PAPPA2	pappalysin 2 [Source:HGNC Symbol;Acc:HGNC:14615]	protein_coding	3	19	7	20	11	38	4	25	28	71	0	8	24	6	32	2	17	54	11	84	10	195	9	13	18	48	10	21	17	60	13	13	5	41	105	23	9	10	45	28	12	15	0	86	57
ENSG00000270106	ENSG00000270106	TSNAX-DISC1	TSNAX-DISC1 readthrough (NMD candidate) [Source:HGNC Symbol;Acc:HGNC:49177]	protein_coding	689	915	167	251	1017	577	781	398	335	872	613	1775	396	793	300	511	168	958	227	415	1094	790	669	582	39	1079	514	647	959	1365	346	494	241	1191	840	690	420	553	320	663	422	626	1828	58	150
ENSG00000232194	ENSG00000232194		novel transcript	lncRNA	0	0	0	5	0	1	0	2	0	0	0	0	7	0	0	0	0	1	0	2	0	7	19	9	0	0	0	5	0	17	0	0	0	0	0	0	18	0	0	5	0	0	0	1	6
ENSG00000235152	ENSG00000235152		novel transcript	lncRNA	0	1	0	0	0	18	0	0	0	22	0	0	0	0	0	0	0	25	0	25	0	19	0	18	0	7	1	6	1	38	11	7	0	0	3	0	0	0	1	2	0	0	0	3	7
ENSG00000237980	ENSG00000237980	LINC02773	long intergenic non-protein coding RNA 2773 [Source:HGNC Symbol;Acc:HGNC:54293]	lncRNA	14	5	2	3	3	3	3	5	6	8	5	22	1	3	0	0	3	9	5	12	27	47	5	0	1	0	1	7	0	2	1	9	4	5	1	134	3	0	0	25	0	0	0	17	9
ENSG00000230849	ENSG00000230849	GOT2P2	GOT2 pseudogene 2 [Source:HGNC Symbol;Acc:HGNC:4435]	processed_pseudogene	0	4	0	0	0	9	0	10	0	0	0	2	0	12	20	0	0	14	0	7	0	6	0	0	0	0	0	12	0	0	0	1	0	0	0	8	0	0	0	1	0	1	18	14	5
ENSG00000170382	ENSG00000170382	LRRN2	leucine rich repeat neuronal 2 [Source:HGNC Symbol;Acc:HGNC:16914]	protein_coding	3	25	7	23	13	9	7	14	12	15	0	4	2	0	5	5	3	8	4	18	25	33	63	8	20	54	23	18	9	54	21	2	15	29	12	13	34	1	16	1	14	7	31	30	41
ENSG00000228664	ENSG00000228664		ribosomal protein L18 (RPL18) pseudogene	processed_pseudogene	0	4	0	0	18	12	0	0	2	0	0	0	0	0	6	0	0	12	0	3	9	0	1	0	5	0	7	4	0	6	0	3	0	0	0	0	0	0	0	1	0	0	0	5	3
ENSG00000287450	ENSG00000287450		exocyst complex component 8 (EXOC8) pseudogene	unprocessed_pseudogene	1	3	0	6	2	11	0	0	0	11	0	6	0	0	4	0	1	2	0	9	0	30	9	0	2	0	0	0	0	0	0	0	0	0	48	0	0	0	0	18	1	0	0	0	2
ENSG00000233583	ENSG00000233583		tyrosine aminotransferase (TAT) pseudogene	processed_pseudogene	0	14	0	5	0	1	2	12	0	2	0	0	13	0	0	2	3	10	0	6	0	16	2	2	4	18	8	11	0	0	7	0	2	0	92	1	1	0	0	0	0	1	0	0	5
ENSG00000066027	ENSG00000066027	PPP2R5A	protein phosphatase 2 regulatory subunit B'alpha [Source:HGNC Symbol;Acc:HGNC:9309]	protein_coding	3058	1719	507	267	1790	1538	2818	986	1675	1939	1631	3941	1552	1246	825	1229	694	1745	781	721	1924	1717	2576	1252	238	2146	1655	1742	3044	2577	1105	936	641	2839	876	1749	1826	124	1494	724	1182	710	150	25	337
ENSG00000286263	ENSG00000286263		novel transcript	lncRNA	0	0	0	1	0	2	0	1	1	27	0	7	3	0	2	0	7	24	0	18	1	22	3	12	0	28	5	11	31	26	2	6	4	1	1	2	3	0	7	0	5	4	20	25	6
ENSG00000236372	ENSG00000236372		novel transcript	lncRNA	0	0	0	1	0	0	0	0	0	5	0	0	0	0	0	1	2	0	0	3	0	1	2	0	0	0	0	2	0	0	0	2	0	14	1	7	2	1	0	0	0	0	5	17	5
ENSG00000224525	ENSG00000224525		novel transcript, antisense to PLD5	lncRNA	0	0	0	11	2	24	0	0	2	14	0	0	0	0	0	0	4	4	0	11	19	10	0	15	1	11	2	2	0	12	0	0	4	8	1	1	2	0	12	1	0	0	27	0	2
ENSG00000188770	ENSG00000188770	OPTC	opticin [Source:HGNC Symbol;Acc:HGNC:8158]	protein_coding	0	0	0	1	0	0	1	3	0	0	0	0	0	0	0	0	1	6	0	3	0	7	0	0	1	0	0	3	0	1	0	0	0	0	7	4	7	3	3	1	0	1	105	11	16
ENSG00000173728	ENSG00000173728	C1orf100	chromosome 1 open reading frame 100 [Source:HGNC Symbol;Acc:HGNC:30435]	protein_coding	0	9	0	9	1	28	0	0	0	0	0	0	0	0	14	0	0	14	1	16	13	19	1	0	5	12	3	8	1	5	2	0	0	0	14	5	1	0	36	2	0	0	12	2	11
ENSG00000094975	ENSG00000094975	SUCO	SUN domain containing ossification factor [Source:HGNC Symbol;Acc:HGNC:1240]	protein_coding	166	242	99	35	283	119	289	198	118	394	2	324	298	143	80	40	52	251	25	246	205	150	316	208	45	265	163	198	512	511	223	31	74	242	143	14	208	1	167	8	116	2	69	41	24
ENSG00000162772	ENSG00000162772	ATF3	activating transcription factor 3 [Source:HGNC Symbol;Acc:HGNC:785]	protein_coding	68	39	23	8	178	43	228	45	52	83	94	162	212	243	44	17	34	53	28	54	285	22	136	66	7	90	74	28	286	56	124	76	49	75	220	17	101	71	289	85	8	2	11	30	30
ENSG00000135828	ENSG00000135828	RNASEL	ribonuclease L [Source:HGNC Symbol;Acc:HGNC:10050]	protein_coding	666	520	170	48	352	587	802	420	459	566	328	1360	804	512	135	318	193	1184	154	570	611	322	462	179	75	768	488	557	723	1268	418	354	236	1032	500	1574	764	775	193	792	900	1471	15	18	26
ENSG00000076356	ENSG00000076356	PLXNA2	plexin A2 [Source:HGNC Symbol;Acc:HGNC:9100]	protein_coding	42	102	42	137	28	167	50	92	53	200	0	44	1	51	88	228	91	79	30	125	25	364	193	42	9	96	12	87	245	153	73	52	28	252	57	918	123	21	356	74	13	10	106	174	127
ENSG00000215819	ENSG00000215819	KRT18P12	keratin 18 pseudogene 12 [Source:HGNC Symbol;Acc:HGNC:33410]	processed_pseudogene	5	0	1	7	1	10	10	5	12	5	18	0	0	0	24	0	9	26	6	14	0	0	13	1	5	3	4	31	9	7	1	7	0	2	2	6	2	0	0	0	0	0	1	23	4
ENSG00000116711	ENSG00000116711	PLA2G4A	phospholipase A2 group IVA [Source:HGNC Symbol;Acc:HGNC:9035]	protein_coding	176	343	68	79	201	233	227	86	101	79	62	163	229	342	143	319	137	315	48	269	384	392	469	211	38	334	131	298	314	491	228	58	41	277	57	1	155	332	333	139	0	646	48	29	439
ENSG00000224436	ENSG00000224436		DEAD (Asp-Glu-Ala-Asp) box polypeptide 60 (DDX60) pseudogene	processed_pseudogene	0	6	1	10	23	4	1	4	3	33	0	0	10	3	26	8	1	7	1	16	1	9	1	12	7	15	8	16	6	11	3	1	2	2	0	0	2	0	2	18	0	0	0	0	1
ENSG00000228208	ENSG00000228208	LINC02869	long intergenic non-protein coding RNA 2869 [Source:HGNC Symbol;Acc:HGNC:32045]	lncRNA	0	5	0	5	3	3	0	6	0	22	0	1	7	1	4	7	0	29	1	28	0	18	1	4	9	16	2	25	5	38	1	2	5	5	32	4	1	1	9	21	0	5	0	11	6
ENSG00000273384	ENSG00000273384		novel transcript	lncRNA	0	1	0	1	0	0	0	2	0	0	0	2	4	0	0	0	0	0	0	13	0	27	0	6	0	6	1	0	0	9	0	0	0	0	1	0	0	0	0	0	1	0	13	2	0
ENSG00000143845	ENSG00000143845	ETNK2	ethanolamine kinase 2 [Source:HGNC Symbol;Acc:HGNC:25575]	protein_coding	52	50	18	17	216	76	142	12	18	197	78	61	155	148	69	8	49	61	30	22	140	34	289	26	18	31	71	32	458	48	115	11	57	29	364	14	15	1	96	5	948	0	20	58	49
ENSG00000235862	ENSG00000235862		novel transcript	lncRNA	0	0	0	0	0	0	1	0	0	0	0	0	0	0	0	2	0	1	0	0	0	0	0	3	0	0	0	2	0	0	0	0	0	2	0	4	0	0	2	0	0	0	1	12	15
ENSG00000069812	ENSG00000069812	HES2	hes family bHLH transcription factor 2 [Source:HGNC Symbol;Acc:HGNC:16005]	protein_coding	1	2	0	7	14	1	10	6	4	3	0	2	1	18	18	0	2	13	3	2	4	3	3	1	1	7	9	4	10	8	25	0	7	12	11	17	12	3	5	1	12	0	125	67	30
ENSG00000157060	ENSG00000157060	SHCBP1L	SHC binding and spindle associated 1 like [Source:HGNC Symbol;Acc:HGNC:16788]	protein_coding	0	22	1	11	4	14	1	2	0	0	0	0	6	0	21	1	2	7	1	36	4	9	9	9	5	25	4	13	1	5	1	3	1	1	1	8	3	1	7	1	2	0	52	18	26
ENSG00000236439	ENSG00000236439		ribosomal protein S27 (metallopanstimulin 1) (RPS27) pseudogene	processed_pseudogene	7	9	3	11	21	10	18	3	5	13	4	35	10	11	17	8	15	13	5	17	12	13	10	9	1	11	5	13	11	17	2	3	6	27	5	8	4	3	11	3	4	16	30	28	3
ENSG00000224260	ENSG00000224260		novel transcript	lncRNA	0	8	2	21	4	13	2	0	4	29	0	13	1	1	13	3	3	30	0	21	0	78	4	1	5	16	1	9	5	22	10	4	1	0	19	1	6	4	31	14	1	1	50	13	9
ENSG00000287220	ENSG00000287220		novel transcript, antisense to PLXNA2	lncRNA	0	2	0	1	0	1	0	1	1	0	0	0	0	0	0	0	0	14	1	5	12	39	0	1	4	1	0	0	7	37	1	0	0	0	0	0	1	3	3	1	1	0	0	3	1
ENSG00000230063	ENSG00000230063		novel transcript, sense intronic to PPP2R5A	lncRNA	1	5	1	4	0	20	3	1	6	0	0	0	0	1	3	0	1	17	0	1	10	4	2	9	1	12	4	8	14	0	7	0	0	5	9	1	9	2	32	0	0	0	0	0	1
ENSG00000123684	ENSG00000123684	LPGAT1	lysophosphatidylglycerol acyltransferase 1 [Source:HGNC Symbol;Acc:HGNC:28985]	protein_coding	1816	1458	294	425	1795	1781	2502	939	979	2045	1476	1914	1403	1112	894	1542	687	1080	429	485	1808	1479	1779	1016	135	957	1062	1109	2008	1999	894	769	460	2886	505	62	891	36	1008	798	5	0	45	40	342
ENSG00000117707	ENSG00000117707	PROX1	prospero homeobox 1 [Source:HGNC Symbol;Acc:HGNC:9459]	protein_coding	26	92	4	29	119	58	11	37	25	76	95	64	85	20	68	68	24	60	14	30	79	25	99	9	42	60	15	26	177	5	87	70	27	290	0	7	3	5	255	85	6	0	7	12	251
ENSG00000228044	ENSG00000228044		novel transcript	lncRNA	0	3	0	1	0	26	0	0	0	15	0	0	0	2	0	0	0	0	0	21	0	3	0	0	1	11	0	17	10	0	0	0	0	0	6	3	0	2	0	31	0	0	33	11	16
ENSG00000225338	ENSG00000225338	RPL23AP18	ribosomal protein L23a pseudogene 18 [Source:HGNC Symbol;Acc:HGNC:36726]	processed_pseudogene	4	3	3	6	5	18	3	0	2	8	4	12	4	6	7	4	3	11	2	3	7	69	1	12	0	21	6	2	10	6	4	3	0	9	1	1	2	2	0	0	3	1	5	0	0
ENSG00000224407	ENSG00000224407		novel transcript	lncRNA	10	22	7	3	18	6	38	14	3	27	0	36	25	3	21	0	22	38	0	2	27	1	26	19	4	13	14	50	34	22	9	17	6	26	54	3	16	0	39	44	2	0	0	5	51
ENSG00000232463	ENSG00000232463		ribosomal protein L13 (RPL13) pseudogene	processed_pseudogene	0	0	0	0	2	2	3	0	0	1	0	0	6	0	11	3	1	0	0	6	0	1	0	5	3	2	5	4	9	0	0	0	0	0	1	3	0	0	2	0	0	0	0	3	2
ENSG00000225171	ENSG00000225171	DUTP6	deoxyuridine triphosphatase pseudogene 6 [Source:HGNC Symbol;Acc:HGNC:39519]	processed_pseudogene	4	5	0	2	0	0	0	0	0	13	0	12	0	0	1	0	0	2	0	3	0	0	0	0	0	0	2	0	6	26	0	0	0	1	0	1	0	0	0	0	1	0	0	0	1
ENSG00000226843	ENSG00000226843		heterogeneous nuclear ribonucleoprotein D-like (HNRPDL) pseudogene	processed_pseudogene	0	3	0	1	1	11	0	0	1	2	0	2	0	5	3	1	0	4	0	11	20	0	0	0	0	5	0	12	0	0	0	0	0	0	25	0	0	0	0	3	0	0	0	0	0
ENSG00000123836	ENSG00000123836	PFKFB2	6-phosphofructo-2-kinase/fructose-2,6-biphosphatase 2 [Source:HGNC Symbol;Acc:HGNC:8873]	protein_coding	2668	2090	476	459	1084	3297	2200	3911	1013	2289	833	2043	1003	1813	608	3320	967	7262	295	1472	818	3221	1899	2392	272	3362	707	2179	1692	4910	557	2608	569	7272	1076	3273	2001	2545	1354	719	1998	2172	957	73	485
ENSG00000223982	ENSG00000223982	SNRPD2P2	small nuclear ribonucleoprotein D2 pseudogene 2 [Source:HGNC Symbol;Acc:HGNC:38598]	processed_pseudogene	0	3	0	2	3	18	0	0	4	19	0	0	0	2	9	0	5	9	0	13	3	27	5	1	5	0	8	6	11	15	1	6	0	0	9	0	0	0	2	0	0	0	0	24	6
ENSG00000229832	ENSG00000229832		novel transcript, sense intronic to PPP2R5A	lncRNA	0	10	2	12	9	1	4	12	4	15	0	0	2	0	13	0	3	3	5	26	5	2	1	4	21	12	15	20	1	1	0	0	0	0	0	0	5	0	2	0	1	0	4	0	13
ENSG00000117691	ENSG00000117691	NENF	neudesin neurotrophic factor [Source:HGNC Symbol;Acc:HGNC:30384]	protein_coding	412	465	226	210	1398	362	1081	375	248	549	349	724	753	529	406	767	195	552	207	198	1276	477	1399	903	175	841	334	319	2155	941	535	209	375	1097	665	955	1035	844	2051	1372	2110	1561	2608	2448	1181
ENSG00000225233	ENSG00000225233		novel transcript	lncRNA	0	0	0	0	2	0	0	0	0	0	0	0	0	0	3	0	6	11	1	14	0	26	0	0	0	0	2	0	0	17	0	0	0	11	0	0	0	0	1	0	0	0	13	2	6
ENSG00000274895	ENSG00000274895		novel transcript, antisense to PROX1	lncRNA	0	1	0	0	0	0	0	0	0	0	4	0	0	5	9	0	1	8	0	5	0	0	2	0	0	4	4	4	13	0	0	1	0	0	4	1	0	1	1	0	0	0	14	5	11
ENSG00000237514	ENSG00000237514	PTP4A1P7	PTP4A1 pseudogene 7 [Source:HGNC Symbol;Acc:HGNC:41934]	processed_pseudogene	0	3	0	4	0	6	0	0	0	1	0	0	0	0	0	0	6	12	0	26	1	16	0	0	7	0	0	1	0	0	0	0	0	1	0	2	1	0	0	0	0	0	0	0	2
ENSG00000287856	ENSG00000287856		novel protein	protein_coding	3063	1586	782	409	2476	1670	3970	1309	2377	2213	1479	2638	3842	2149	1172	1858	911	2269	763	1076	1587	1899	3248	1940	321	2423	1524	2238	3437	2707	1742	1124	708	4128	1120	2593	2135	1253	1121	879	3383	688	151	73	704
ENSG00000284299	NA	NA	NA	NA	3	1	0	1	3	2	0	0	0	1	0	1	1	0	3	2	1	1	1	9	0	6	0	2	2	4	1	1	7	4	5	6	0	0	0	10	0	0	1	0	0	1	104	5	17
ENSG00000203705	ENSG00000203705	TATDN3	TatD DNase domain containing 3 [Source:HGNC Symbol;Acc:HGNC:27010]	protein_coding	591	384	118	269	1213	393	482	262	170	248	447	921	722	527	232	482	156	665	184	301	630	610	483	538	68	465	259	300	434	387	376	340	198	629	472	535	457	252	264	346	471	1508	2	20	471
ENSG00000279838	ENSG00000279838		TEC	TEC	0	23	22	25	5	21	8	13	13	4	28	60	0	16	12	0	7	0	3	16	3	15	5	1	9	15	10	7	4	0	22	0	6	2	12	8	0	5	1	0	0	6	48	0	6
ENSG00000174175	ENSG00000174175	SELP	selectin P [Source:HGNC Symbol;Acc:HGNC:10721]	protein_coding	94	322	126	236	895	388	252	250	175	651	65	469	504	770	138	1294	4	165	164	328	1113	464	924	968	114	1058	393	475	734	915	183	95	173	757	6	8	107	0	989	26	0	725	15	62	20
ENSG00000241475	ENSG00000241475		novel transcript	lncRNA	0	0	0	0	0	6	0	1	0	2	0	0	0	0	0	6	0	5	0	5	0	5	0	0	0	2	0	5	0	7	0	1	0	0	2	2	0	0	0	17	0	0	1	20	1
ENSG00000286421	ENSG00000286421		novel transcript	lncRNA	0	0	0	0	0	0	0	1	0	2	0	0	0	0	0	1	0	3	0	5	0	17	0	0	0	10	0	11	0	3	0	0	0	0	0	1	1	0	30	0	0	0	97	6	15
ENSG00000008118	ENSG00000008118	CAMK1G	calcium/calmodulin dependent protein kinase IG [Source:HGNC Symbol;Acc:HGNC:14585]	protein_coding	0	0	11	1	131	0	0	3	22	74	0	4	0	3	6	51	0	15	0	11	53	36	0	1	0	2	11	4	0	2	6	6	0	1	1	21	11	11	2	2	3	7	29	37	31
ENSG00000171161	ENSG00000171161	ZNF672	zinc finger protein 672 [Source:HGNC Symbol;Acc:HGNC:26179]	protein_coding	347	609	98	160	636	550	495	385	234	842	544	866	300	395	178	835	233	1285	92	256	364	486	750	712	48	749	614	898	717	1367	162	228	132	1165	1445	8	577	38	402	723	13	1011	51	47	51
ENSG00000270818	ENSG00000270818		regulator of chromosome condensation 2 (RCC2) pseudogene	processed_pseudogene	2	1	0	0	3	12	0	0	0	0	0	1	0	2	15	0	0	0	0	0	3	7	2	0	0	3	0	7	0	2	0	0	0	0	2	6	0	2	1	0	6	0	0	10	2
ENSG00000196878	ENSG00000196878	LAMB3	laminin subunit beta 3 [Source:HGNC Symbol;Acc:HGNC:6490]	protein_coding	0	2	0	3	3	4	31	21	0	119	0	1	38	16	21	8	1	5	0	3	1	8	2	72	18	1	6	15	2	0	3	0	3	14	17	24	4	7	3	7	2	11	256	47	36
ENSG00000133059	ENSG00000133059	DSTYK	dual serine/threonine and tyrosine protein kinase [Source:HGNC Symbol;Acc:HGNC:29043]	protein_coding	287	711	113	121	1413	484	433	215	189	570	488	912	675	349	131	499	118	959	141	335	503	614	880	660	86	588	580	672	806	799	381	289	105	566	945	38	197	852	275	113	0	390	31	160	113
ENSG00000224668	ENSG00000224668	IPO8P1	importin 8 pseudogene 1 [Source:HGNC Symbol;Acc:HGNC:41955]	processed_pseudogene	0	0	0	1	3	0	0	0	2	1	0	2	1	0	2	2	0	3	1	1	0	2	0	1	0	1	1	0	13	2	2	3	0	0	3	1	0	1	0	0	0	0	69	1	6
ENSG00000074964	ENSG00000074964	ARHGEF10L	Rho guanine nucleotide exchange factor 10 like [Source:HGNC Symbol;Acc:HGNC:25540]	protein_coding	33	280	34	38	92	173	85	24	26	14	0	218	159	113	138	218	37	289	24	120	309	238	243	64	3	103	9	153	587	462	107	66	24	442	57	15	221	8	198	307	9	12	86	182	77
ENSG00000116918	ENSG00000116918	TSNAX	translin associated factor X [Source:HGNC Symbol;Acc:HGNC:12380]	protein_coding	1475	2069	380	458	2261	1240	1662	832	702	1946	1106	3559	869	1746	574	1218	408	2177	390	821	2117	1685	1376	1214	128	2333	896	1397	1860	2762	684	977	418	2415	1454	1634	853	1318	754	1220	1195	1365	3177	32	379
ENSG00000274020	ENSG00000274020	LINC01138	long intergenic non-protein coding RNA 1138 [Source:HGNC Symbol;Acc:HGNC:49454]	lncRNA	158	191	36	69	330	118	126	52	130	148	57	243	70	108	100	144	50	148	60	97	113	175	133	160	23	231	59	200	164	187	58	58	51	156	86	55	145	8	84	281	2	169	28	45	69
ENSG00000287445	ENSG00000287445		novel transcript	lncRNA	2	19	0	20	32	7	0	12	1	80	0	17	8	2	21	28	2	26	11	3	27	121	12	11	7	14	17	6	30	55	5	3	7	20	0	127	16	0	21	12	0	0	0	0	64
ENSG00000259815	ENSG00000259815	LINC02769	long intergenic non-protein coding RNA 2769 [Source:HGNC Symbol;Acc:HGNC:54289]	lncRNA	0	0	0	1	5	13	0	0	0	2	0	0	0	0	16	0	0	0	0	4	0	0	0	1	1	0	0	6	0	0	0	2	0	0	4	0	3	0	0	0	0	0	0	1	0
ENSG00000240963	ENSG00000240963		novel transcript, antisense to C1orf100	lncRNA	195	425	51	86	207	346	514	165	148	709	222	743	323	369	94	208	47	257	51	95	150	338	288	231	39	456	531	685	320	387	134	101	88	244	171	149	82	98	123	84	50	237	920	2	72
ENSG00000226570	ENSG00000226570		natural cytotoxicity triggering receptor 1 (NCR1) pseudogene	processed_pseudogene	0	0	1	9	0	8	0	0	1	0	0	0	0	0	2	0	1	9	0	1	3	0	0	36	3	0	0	7	0	0	1	0	0	3	0	1	0	0	0	0	0	0	0	3	5
ENSG00000198929	ENSG00000198929	NOS1AP	nitric oxide synthase 1 adaptor protein [Source:HGNC Symbol;Acc:HGNC:16859]	protein_coding	18	37	5	14	17	52	0	14	14	82	20	19	9	44	33	23	12	26	3	39	27	38	12	73	9	27	31	37	50	82	26	13	7	41	175	30	93	2	31	8	2	8	22	60	60
ENSG00000230628	ENSG00000230628		novel transcript	lncRNA	1	1	0	9	0	18	5	11	4	43	0	0	0	0	0	1	0	6	0	40	0	11	0	0	2	9	7	12	5	9	0	0	0	0	2	8	1	1	0	1	0	1	1	46	6
ENSG00000162771	ENSG00000162771	GARIN4	golgi associated RAB2 interactor family member 4 [Source:HGNC Symbol;Acc:HGNC:26541]	protein_coding	0	0	0	0	0	0	1	0	0	0	0	0	0	0	0	2	0	1	0	0	0	0	0	3	0	0	0	2	0	0	0	0	0	0	0	6	0	0	2	0	0	0	3	24	13
ENSG00000227579	ENSG00000227579		novel transcript	lncRNA	0	1	0	0	2	11	0	2	4	0	0	6	0	1	0	1	0	7	0	24	0	2	0	1	5	3	2	3	0	32	0	0	0	4	0	3	0	0	3	0	0	0	2	14	17
ENSG00000176393	ENSG00000176393	RNPEP	arginyl aminopeptidase [Source:HGNC Symbol;Acc:HGNC:10078]	protein_coding	544	1383	134	325	1006	1291	928	600	691	2105	425	1826	860	1012	337	1224	275	1307	229	609	946	1470	799	636	126	1318	898	1214	1641	1480	388	403	239	2089	298	663	1712	1419	970	2295	1	4784	3248	19	36
ENSG00000174606	ENSG00000174606	ANGEL2	angel homolog 2 [Source:HGNC Symbol;Acc:HGNC:30534]	protein_coding	214	480	51	195	733	433	123	200	336	300	304	970	175	344	318	624	145	614	145	324	636	1047	537	398	95	508	230	408	672	741	249	206	133	543	399	537	255	276	285	360	579	297	14	33	34
ENSG00000179914	ENSG00000179914	ITLN1	intelectin 1 [Source:HGNC Symbol;Acc:HGNC:18259]	protein_coding	142	25	285	43	2186	45	2997	32	432	137	569	53	1832	49	827	167	214	104	751	35	2568	118	3291	49	350	106	589	72	2185	107	1242	2	175	53	1583	24	478	0	1420	1	13314	1	57	9460	4459
ENSG00000235750	ENSG00000235750	KIAA0040	KIAA0040 [Source:HGNC Symbol;Acc:HGNC:28950]	protein_coding	3199	2448	1614	843	5269	2179	7804	1619	2092	1827	3443	5857	3966	1964	2455	7131	1676	4147	1052	2260	3377	2220	3754	2756	309	4577	2154	3417	6026	7765	1822	3028	754	4813	2438	5522	3938	334	2844	2057	3046	1899	22	17	2513
ENSG00000284376	ENSG00000284376		novel transcript	lncRNA	0	28	0	8	35	11	0	0	8	7	0	37	3	0	7	0	1	25	0	27	0	17	1	7	8	2	0	35	2	15	1	2	0	9	0	123	0	0	2	180	0	0	10	9	39
ENSG00000121446	ENSG00000121446	RGSL1	regulator of G protein signaling like 1 [Source:HGNC Symbol;Acc:HGNC:18636]	protein_coding	2	24	9	39	45	13	4	14	20	46	0	10	1	4	45	2	14	52	1	77	41	77	21	7	31	52	16	58	8	48	29	21	5	15	39	63	2	40	44	3	2	1	9	87	44
ENSG00000226758	ENSG00000226758	DISC1-IT1	DISC1 intronic transcript 1 [Source:HGNC Symbol;Acc:HGNC:41325]	lncRNA	0	5	0	4	4	19	3	1	3	8	0	4	0	0	16	0	8	10	0	7	4	48	1	2	5	22	7	22	11	4	22	6	0	0	22	1	2	13	23	12	0	0	26	17	11
ENSG00000230199	ENSG00000230199		ribosomal protein L41 (RPL41) pseudogene	processed_pseudogene	2	10	2	2	10	1	2	1	0	6	5	7	3	2	5	2	3	4	1	6	5	30	6	6	0	3	3	3	6	5	4	4	3	11	0	0	1	0	0	0	0	1	0	0	4
ENSG00000233304	ENSG00000233304	LINC01346	long intergenic non-protein coding RNA 1346 [Source:HGNC Symbol;Acc:HGNC:50563]	lncRNA	0	3	1	0	4	35	1	7	1	19	0	45	7	0	5	0	2	25	3	23	0	5	1	8	0	4	1	11	0	3	4	6	1	0	5	6	0	1	2	1	80	0	202	74	21
ENSG00000227887	ENSG00000227887	RPS26P13	ribosomal protein S26 pseudogene 13 [Source:HGNC Symbol;Acc:HGNC:35784]	processed_pseudogene	0	13	0	1	1	4	0	6	0	6	0	0	2	0	2	0	0	15	2	14	3	27	0	0	3	1	0	7	1	0	3	0	0	0	7	0	2	1	2	0	0	0	0	0	1
ENSG00000116903	ENSG00000116903	EXOC8	exocyst complex component 8 [Source:HGNC Symbol;Acc:HGNC:24659]	protein_coding	158	297	34	33	24	287	141	134	53	157	161	626	160	63	69	133	40	224	37	61	234	128	199	91	24	176	119	142	271	176	54	102	31	202	165	7	52	2	134	78	1	0	94	36	7
ENSG00000287354	ENSG00000287354		novel transcript, antisense to HHAT	lncRNA	0	5	1	20	7	10	1	4	11	13	0	0	0	0	5	0	6	1	0	12	4	0	4	0	3	3	0	1	5	26	1	1	1	0	60	7	1	0	12	2	0	0	16	8	41
ENSG00000233827	ENSG00000233827	CCNQP1	CCNQ pseudogene 1 [Source:HGNC Symbol;Acc:HGNC:27373]	processed_pseudogene	0	5	0	23	0	16	0	4	2	30	0	0	0	0	19	0	0	7	0	6	0	15	3	4	2	3	1	2	0	0	0	3	0	28	110	0	2	0	6	47	0	0	0	0	5
ENSG00000198797	ENSG00000198797	BRINP2	BMP/retinoic acid inducible neural specific 2 [Source:HGNC Symbol;Acc:HGNC:13746]	protein_coding	0	5	0	2	12	44	0	1	2	16	0	1	0	0	15	0	2	33	1	22	12	32	2	1	4	0	1	11	5	15	12	2	0	2	6	20	1	2	12	1	4	1	21	75	16
ENSG00000151414	ENSG00000151414	NEK7	NIMA related kinase 7 [Source:HGNC Symbol;Acc:HGNC:13386]	protein_coding	4166	4229	1073	1043	6291	2411	5541	1899	2452	3859	3097	6679	5605	2443	2151	4296	2137	3701	1264	1662	6363	4072	5669	3010	555	4235	2414	2943	8552	4477	3516	2028	1394	5611	572	2430	3943	1306	3367	1330	2785	2698	15	1316	789
ENSG00000177614	ENSG00000177614	PGBD5	piggyBac transposable element derived 5 [Source:HGNC Symbol;Acc:HGNC:19405]	protein_coding	0	13	18	15	27	7	6	3	10	35	0	6	1	0	23	6	6	16	0	23	10	46	10	33	8	4	5	9	22	15	13	4	1	35	133	33	11	3	19	3	2	13	98	76	67
ENSG00000223794	ENSG00000223794	COX5BP8	cytochrome c oxidase subunit 5B pseudogene 8 [Source:HGNC Symbol;Acc:HGNC:39083]	processed_pseudogene	0	0	0	3	0	0	0	2	1	14	0	0	0	0	0	0	0	0	0	1	0	1	3	7	4	3	5	6	1	1	0	0	1	0	1	0	0	4	0	0	0	0	0	0	15
ENSG00000287157	ENSG00000287157		novel transcript, antisense to HHAT	lncRNA	0	4	0	8	0	10	2	1	0	0	0	0	0	0	0	0	0	6	0	14	0	22	9	0	1	2	4	8	0	0	1	0	0	0	36	4	0	2	1	0	0	0	36	29	8
ENSG00000233920	ENSG00000233920		novel transcript	lncRNA	0	10	1	13	0	21	0	10	4	8	0	7	0	1	0	0	0	1	3	11	18	1	7	1	4	12	1	0	3	9	2	0	2	2	20	3	1	0	2	16	2	0	10	0	3
ENSG00000183831	ENSG00000183831	ANKRD45	ankyrin repeat domain 45 [Source:HGNC Symbol;Acc:HGNC:24786]	protein_coding	1	8	1	4	2	6	37	9	6	31	0	2	1	55	5	2	13	20	6	34	61	25	32	18	10	67	17	25	4	33	0	4	5	23	6	4	45	1	8	0	2	0	5	1	23
ENSG00000225755	ENSG00000225755		tRNA nucleotidyl transferase, CCA-adding, 1 (TRNT1) pseudogene	processed_pseudogene	1	7	0	10	1	11	6	9	10	5	0	3	2	0	27	0	1	26	11	28	2	30	6	26	8	7	8	36	14	41	3	9	3	1	47	0	0	1	9	0	0	3	52	6	7
ENSG00000143858	ENSG00000143858	SYT2	synaptotagmin 2 [Source:HGNC Symbol;Acc:HGNC:11510]	protein_coding	0	1	7	3	56	2	1	8	1	3	0	2	0	0	17	3	0	13	1	1	0	3	4	1	0	1	0	4	2	4	3	2	0	2	8	18	3	10	3	0	5	4	67	68	37
ENSG00000197472	ENSG00000197472	ZNF695	zinc finger protein 695 [Source:HGNC Symbol;Acc:HGNC:30954]	protein_coding	1	16	1	2	1	7	1	1	9	87	0	0	0	4	9	11	3	9	3	4	4	28	1	5	13	7	0	26	0	22	8	0	0	23	0	5	8	1	1	7	3	0	0	16	17
ENSG00000230019	ENSG00000230019	YWHAQP9	YWHAQ pseudogene 9 [Source:HGNC Symbol;Acc:HGNC:37688]	processed_pseudogene	0	4	0	0	0	2	0	0	0	1	0	0	0	0	0	0	0	3	0	2	0	0	0	0	0	0	0	2	0	0	0	0	0	0	1	0	0	0	0	0	2	1	0	0	0
ENSG00000136643	ENSG00000136643	RPS6KC1	ribosomal protein S6 kinase C1 [Source:HGNC Symbol;Acc:HGNC:10439]	protein_coding	254	655	55	237	521	634	340	293	132	679	47	663	771	388	344	596	30	667	96	250	577	465	470	155	79	370	282	412	681	582	234	276	165	497	580	10	329	285	391	697	0	883	3	58	4
ENSG00000232537	ENSG00000232537		novel transcript	lncRNA	0	11	3	8	34	30	2	7	4	56	1	5	0	0	6	0	17	23	2	46	4	21	27	6	15	7	9	25	7	14	4	4	0	5	38	1	0	3	13	0	0	1	36	33	5
ENSG00000285521	ENSG00000285521		novel transcript	lncRNA	0	2	0	8	5	8	0	0	0	3	0	0	0	8	0	0	1	23	0	3	7	1	4	18	4	0	0	3	26	4	0	3	2	0	6	0	19	0	1	4	0	0	21	0	5
ENSG00000176855	ENSG00000176855	KRT18P28	keratin 18 pseudogene 28 [Source:HGNC Symbol;Acc:HGNC:33397]	processed_pseudogene	0	3	0	0	0	0	1	0	0	7	0	0	0	0	0	0	0	0	0	3	2	25	1	0	0	0	0	4	0	0	0	0	0	0	0	0	1	3	0	0	0	0	0	0	10
ENSG00000227728	ENSG00000227728		ubiquitin specific protease 6 (Tre-2 oncogene) (USP6) pseudogene	unprocessed_pseudogene	0	3	1	6	1	3	3	2	0	23	0	0	0	1	3	0	5	11	2	2	2	42	0	0	3	2	4	28	20	28	11	0	0	2	4	9	5	1	2	1	4	0	41	12	21
ENSG00000133069	ENSG00000133069	TMCC2	transmembrane and coiled-coil domain family 2 [Source:HGNC Symbol;Acc:HGNC:24239]	protein_coding	405	2208	198	524	2465	1726	558	1664	189	1342	638	1784	774	701	779	1105	726	2676	422	2979	705	787	3852	4795	377	3646	450	1044	1975	4083	664	707	486	1430	1097	1002	1179	3659	1382	832	12	1615	73	66	557
ENSG00000162877	ENSG00000162877	PM20D1	peptidase M20 domain containing 1 [Source:HGNC Symbol;Acc:HGNC:26518]	protein_coding	0	27	0	27	47	37	1	3	3	0	0	1	0	15	4	0	9	14	2	39	0	57	14	22	3	5	0	7	1	81	7	5	2	13	32	16	6	1	10	1	0	3	0	12	77
ENSG00000233461	ENSG00000233461		novel transcript	lncRNA	154	236	40	106	178	349	402	218	122	254	202	213	109	188	129	419	88	289	28	129	111	375	120	132	47	335	146	334	113	341	106	149	51	546	309	341	475	262	279	563	334	531	69	18	720
ENSG00000225401	ENSG00000225401	TGIF2P1	TGFB induced factor homeobox 2 pseudogene 1 [Source:HGNC Symbol;Acc:HGNC:33317]	processed_pseudogene	0	2	0	0	1	2	0	0	0	27	0	0	0	0	0	0	1	2	1	0	0	3	0	0	0	0	0	15	0	19	1	0	0	0	0	47	0	0	1	1	0	1	10	20	6
ENSG00000135747	ENSG00000135747	ZNF670-ZNF695	ZNF670-ZNF695 readthrough (NMD candidate) [Source:HGNC Symbol;Acc:HGNC:49200]	protein_coding	14	16	9	10	13	9	14	11	12	43	3	15	3	38	37	16	4	37	12	12	22	77	9	3	12	21	4	33	22	62	12	7	11	62	9	3	12	4	3	14	7	0	0	23	7
ENSG00000227237	ENSG00000227237	ZNF692-DT	ZNF692 divergent transcript [Source:HGNC Symbol;Acc:HGNC:55817]	lncRNA	0	0	0	0	9	0	0	0	0	11	0	0	0	0	0	1	0	18	0	3	0	4	0	0	0	4	1	4	2	3	2	0	2	0	4	1	0	0	2	1	0	1	0	0	7
ENSG00000069248	ENSG00000069248	NUP133	nucleoporin 133 [Source:HGNC Symbol;Acc:HGNC:18016]	protein_coding	215	717	94	242	633	363	341	296	236	581	270	1156	539	586	288	250	51	484	142	335	310	603	551	696	86	343	359	759	469	588	366	185	152	397	395	727	201	4	246	304	0	766	21	62	29
ENSG00000232812	ENSG00000232812	LINC01717	long intergenic non-protein coding RNA 1717 [Source:HGNC Symbol;Acc:HGNC:52504]	lncRNA	0	3	0	0	0	0	1	0	0	44	0	0	0	0	16	10	0	9	0	27	0	13	0	7	0	2	4	8	0	11	0	0	0	0	53	0	0	0	0	0	0	0	0	0	5
ENSG00000231666	ENSG00000231666	LINC01704	long intergenic non-protein coding RNA 1704 [Source:HGNC Symbol;Acc:HGNC:52492]	lncRNA	0	15	0	7	1	35	6	0	1	3	0	11	0	2	9	5	2	2	0	15	13	11	0	19	1	1	4	11	4	4	4	0	0	0	28	1	19	30	0	10	0	0	6	23	18
ENSG00000234464	ENSG00000234464		novel transcript	lncRNA	0	7	3	4	0	10	0	9	0	10	0	0	0	6	9	0	0	12	0	27	0	32	0	0	4	21	1	2	2	0	1	0	0	1	5	4	13	0	9	0	0	0	0	13	10
ENSG00000227751	ENSG00000227751	RCC2-AS1	RCC2 antisense RNA 1 [Source:HGNC Symbol;Acc:HGNC:41262]	lncRNA	52	175	25	58	34	75	51	97	87	244	58	318	68	220	51	80	29	221	36	64	106	240	84	137	18	223	162	321	148	295	53	49	21	201	47	28	116	238	46	87	0	329	0	0	47
ENSG00000090104	ENSG00000090104	RGS1	regulator of G protein signaling 1 [Source:HGNC Symbol;Acc:HGNC:9991]	protein_coding	81	76	58	15	527	54	531	101	20	66	108	933	211	1416	123	0	56	197	44	148	1004	105	289	106	3	269	148	158	434	531	162	175	119	316	269	375	89	96	399	1114	0	272	57	3	278
ENSG00000285280	ENSG00000285280		novel transcript	lncRNA	1633	1021	738	656	2335	1810	2421	1245	1010	2714	868	1719	1347	967	488	2797	767	1462	790	592	1284	1773	2360	2297	579	3309	966	1764	3044	3901	870	897	597	3246	621	2083	1421	663	3517	605	1174	1640	1012	387	248
ENSG00000232892	ENSG00000232892	RGS5-AS1	RGS5 antisense RNA 1 [Source:HGNC Symbol;Acc:HGNC:40504]	lncRNA	0	18	6	12	0	11	2	0	0	5	0	0	0	0	0	0	0	2	0	10	0	0	0	0	0	5	2	7	2	0	0	0	0	0	0	5	4	0	3	0	0	1	0	24	6
ENSG00000236950	ENSG00000236950	LINC01774	long intergenic non-protein coding RNA 1774 [Source:HGNC Symbol;Acc:HGNC:52564]	lncRNA	0	8	0	0	0	0	0	0	0	0	0	0	0	0	4	0	0	16	0	13	0	0	0	15	0	10	0	9	0	0	0	2	0	0	7	0	0	0	0	0	0	0	0	5	1
ENSG00000143322	ENSG00000143322	ABL2	ABL proto-oncogene 2, non-receptor tyrosine kinase [Source:HGNC Symbol;Acc:HGNC:77]	protein_coding	34	164	52	41	69	86	69	72	21	42	80	107	73	29	149	79	43	135	22	136	42	267	89	34	61	178	91	188	195	95	111	63	45	117	285	105	200	14	181	12	18	0	67	51	57
ENSG00000185220	ENSG00000185220	PGBD2	piggyBac transposable element derived 2 [Source:HGNC Symbol;Acc:HGNC:19399]	protein_coding	47	106	20	22	8	60	134	20	54	165	28	183	4	74	44	45	2	28	4	89	96	10	254	188	4	58	57	85	105	42	20	46	4	187	0	5	88	0	55	73	2	109	1	5	19
ENSG00000230813	ENSG00000230813		pseudogene similar to part of tumor necrosis factor receptor superfamily member 13B (TNFRSF13B)	unprocessed_pseudogene	4	2	0	0	0	0	0	4	0	0	0	4	1	2	0	3	2	0	0	0	1	6	0	15	0	3	12	6	11	0	0	1	0	0	0	0	0	3	0	1	0	3	39	8	4
ENSG00000226862	ENSG00000226862		novel transcript	lncRNA	10	0	2	0	0	1	5	0	5	7	0	4	0	1	0	0	0	0	4	1	0	8	2	0	1	4	0	3	1	1	14	2	3	6	0	0	0	0	0	4	0	0	0	2	5
ENSG00000162769	ENSG00000162769	FLVCR1	FLVCR heme transporter 1 [Source:HGNC Symbol;Acc:HGNC:24682]	protein_coding	29	100	13	30	67	59	44	49	11	76	17	58	9	25	42	26	5	51	9	119	10	76	111	69	23	102	118	112	13	137	25	8	2	119	96	14	3	6	162	74	13	437	74	23	51
ENSG00000133065	ENSG00000133065	SLC41A1	solute carrier family 41 member 1 [Source:HGNC Symbol;Acc:HGNC:19429]	protein_coding	44	161	62	34	52	44	92	32	55	138	82	309	61	127	5	136	94	229	36	83	170	137	69	89	6	110	80	86	138	183	118	59	32	126	250	8	68	19	94	31	2	0	0	67	608
ENSG00000236775	ENSG00000236775		pseudogene similar to part of zinc finger protein (ZNF519)	processed_pseudogene	3	4	0	7	15	3	0	0	9	29	0	0	1	5	4	0	2	17	0	10	14	2	0	0	4	3	3	1	0	0	6	0	1	6	77	0	0	0	33	2	1	0	2	0	4
ENSG00000042781	ENSG00000042781	USH2A	usherin [Source:HGNC Symbol;Acc:HGNC:12601]	protein_coding	1	58	6	55	22	91	7	38	21	86	0	5	0	32	72	6	18	78	10	134	39	109	25	52	39	61	41	102	35	104	17	7	8	5	92	17	20	15	81	15	4	0	46	86	96
ENSG00000234754	ENSG00000234754	LINC02817	long intergenic non-protein coding RNA 2817 [Source:HGNC Symbol;Acc:HGNC:32042]	lncRNA	0	4	8	0	0	0	0	2	34	26	0	0	0	1	8	0	8	1	9	2	26	0	3	0	4	0	5	9	3	0	12	0	0	0	5	3	0	5	44	0	1	1	2	0	13
ENSG00000233084	ENSG00000233084	RPL23AP25	ribosomal protein L23a pseudogene 25 [Source:HGNC Symbol;Acc:HGNC:35672]	processed_pseudogene	8	5	7	3	1	20	21	11	5	1	8	7	4	8	17	14	0	13	4	1	19	7	34	38	2	2	11	25	30	5	0	0	2	58	0	0	19	0	11	14	0	137	0	6	0
ENSG00000227815	ENSG00000227815		novel pseudogene	unprocessed_pseudogene	0	16	4	5	3	6	6	0	5	0	0	0	14	0	0	0	0	8	10	10	0	29	0	0	0	4	0	8	0	7	0	8	0	0	0	0	0	1	0	0	0	0	0	0	2
ENSG00000287046	ENSG00000287046		novel transcript	lncRNA	0	0	0	0	1	0	0	2	3	2	0	0	0	21	0	0	0	2	0	9	49	41	0	0	0	3	0	11	1	2	0	6	0	0	6	3	0	0	0	0	0	0	0	11	1
ENSG00000223774	ENSG00000223774		novel transcript	lncRNA	8	0	0	0	51	0	9	0	4	0	0	0	33	0	12	0	6	0	0	0	51	2	15	0	1	4	0	10	88	5	21	0	1	0	2	4	2	0	35	0	0	0	9	0	5
ENSG00000228863	ENSG00000228863		novel transcript, antisense to CD48	lncRNA	153	306	95	183	468	380	200	207	133	330	338	1610	173	441	126	257	86	398	76	288	180	415	132	222	31	313	139	359	285	640	114	443	79	1244	39	505	172	261	135	553	5	36	22	33	42
ENSG00000286213	ENSG00000286213		novel transcript	lncRNA	0	0	0	3	1	30	0	7	0	1	0	0	0	0	0	0	0	0	0	4	0	0	0	8	3	8	1	5	11	24	0	0	0	0	0	0	0	0	6	2	0	0	2	3	5
ENSG00000277462	ENSG00000277462	ZNF670	zinc finger protein 670 [Source:HGNC Symbol;Acc:HGNC:28167]	protein_coding	84	94	51	10	163	32	112	29	53	109	44	104	43	100	112	63	40	70	64	71	81	219	42	44	19	21	35	47	126	120	63	59	69	93	0	0	19	2	51	0	0	1	0	9	11
ENSG00000035687	ENSG00000035687	ADSS2	adenylosuccinate synthase 2 [Source:HGNC Symbol;Acc:HGNC:292]	protein_coding	999	2096	178	322	1096	1594	2060	804	691	3477	1183	3108	1497	1759	314	868	206	1186	245	505	598	1490	1315	1175	152	2335	2512	2751	1416	1899	445	507	305	1137	841	590	419	494	576	815	248	1422	5100	45	404
ENSG00000213080	ENSG00000213080		spermine synthase (SMS) pseudogene	processed_pseudogene	7	12	4	5	13	5	10	6	6	11	8	15	11	24	4	9	3	13	10	3	8	14	12	11	3	12	8	9	10	14	6	3	3	14	3	0	7	5	5	3	0	1	0	0	6
ENSG00000180287	ENSG00000180287	PLD5	phospholipase D family member 5 [Source:HGNC Symbol;Acc:HGNC:26879]	protein_coding	0	20	0	16	23	24	4	3	10	71	0	4	4	0	22	0	7	31	4	44	16	97	5	21	11	25	16	20	26	90	6	6	0	1	45	11	10	2	11	28	0	2	33	44	34
ENSG00000226693	ENSG00000226693	NXNP1	nucleoredoxin pseudogene 1 [Source:HGNC Symbol;Acc:HGNC:50561]	processed_pseudogene	0	0	0	0	3	1	0	0	0	0	0	0	0	0	0	0	0	14	0	14	1	0	0	0	0	0	0	0	0	0	0	0	0	0	1	0	1	2	1	0	0	0	0	36	2
ENSG00000234678	ENSG00000234678	ELF3-AS1	ELF3 antisense RNA 1 [Source:HGNC Symbol;Acc:HGNC:40211]	lncRNA	292	706	73	166	472	616	472	288	334	1056	196	860	378	495	189	590	129	665	119	332	499	759	431	351	82	686	454	651	826	736	215	223	117	1011	96	263	713	485	443	879	3	1671	352	43	45
ENSG00000231272	ENSG00000231272		novel transcript	lncRNA	0	3	0	6	0	1	0	0	0	0	0	0	0	0	0	0	2	0	0	6	0	26	0	0	0	2	0	2	0	28	0	0	0	0	6	1	0	0	0	0	0	0	0	0	1
ENSG00000163431	ENSG00000163431	LMOD1	leiomodin 1 [Source:HGNC Symbol;Acc:HGNC:6647]	protein_coding	39	4	14	5	189	9	62	0	18	1	5	0	163	0	92	0	23	6	1	1	223	8	131	0	1	0	5	11	396	4	118	0	8	13	6	7	42	0	213	49	3	0	41	12	18
ENSG00000230124	ENSG00000230124	ACBD6	acyl-CoA binding domain containing 6 [Source:HGNC Symbol;Acc:HGNC:23339]	protein_coding	236	473	79	52	357	250	422	146	107	425	107	432	378	304	182	201	117	333	92	242	588	313	563	373	71	403	334	527	552	490	126	143	110	565	618	345	253	211	346	548	43	544	4621	60	284
ENSG00000143473	ENSG00000143473	KCNH1	potassium voltage-gated channel subfamily H member 1 [Source:HGNC Symbol;Acc:HGNC:6250]	protein_coding	3	7	0	3	4	13	2	2	2	35	0	1	4	2	11	2	4	16	0	81	18	59	7	2	12	4	4	15	4	13	4	4	0	4	2	15	5	5	8	1	8	1	87	29	51
ENSG00000228982	ENSG00000228982		pseudogene similar to part of fibroblast growth factor receptor 3 (achondroplasia, thanatophoric dwarfism) (FGFR3)	unprocessed_pseudogene	0	2	0	23	0	6	0	0	0	10	0	0	4	0	9	0	0	6	1	1	0	0	0	0	0	0	0	0	1	0	0	0	0	0	0	3	0	0	4	0	0	1	0	0	7
ENSG00000235096	ENSG00000235096		novel transcript, antisense to SMYD3	lncRNA	0	4	0	1	0	6	3	2	1	0	0	0	2	5	10	3	1	3	0	2	1	9	2	1	6	0	5	2	1	21	2	0	0	1	0	1	10	1	0	0	0	0	0	1	5
ENSG00000007341	ENSG00000007341	ST7L	suppression of tumorigenicity 7 like [Source:HGNC Symbol;Acc:HGNC:18441]	protein_coding	67	130	51	44	142	142	221	88	96	123	92	327	164	114	135	104	76	221	44	194	146	382	248	109	93	95	106	140	170	133	107	68	71	172	455	46	149	25	397	12	259	2	83	48	130
ENSG00000286747	ENSG00000286747		novel transcript	lncRNA	0	6	1	8	8	8	0	2	11	2	0	3	1	0	1	1	4	5	1	22	2	40	5	11	2	3	3	13	40	3	4	0	0	11	20	115	2	6	3	11	0	1	0	8	10
ENSG00000272865	ENSG00000272865		novel transcript, antisense to PLD5	lncRNA	2	25	0	2	3	3	0	2	1	3	0	0	0	0	11	0	9	14	3	10	23	21	2	14	7	4	4	5	1	17	1	0	1	7	0	2	1	1	22	0	0	0	23	26	6
ENSG00000117222	ENSG00000117222	RBBP5	RB binding protein 5, histone lysine methyltransferase complex subunit [Source:HGNC Symbol;Acc:HGNC:9888]	protein_coding	291	760	137	285	743	544	511	458	384	790	292	1579	558	522	304	399	288	958	170	392	650	623	704	445	23	850	271	666	564	1069	273	309	193	643	26	11	472	733	412	97	49	1466	12	66	25
ENSG00000143324	ENSG00000143324	XPR1	xenotropic and polytropic retrovirus receptor 1 [Source:HGNC Symbol;Acc:HGNC:12827]	protein_coding	101	190	85	96	290	66	272	102	115	419	329	205	186	207	144	70	75	385	45	127	413	217	377	257	107	234	75	208	171	435	131	88	94	289	0	5	112	22	167	0	639	0	8	54	222
ENSG00000118193	ENSG00000118193	KIF14	kinesin family member 14 [Source:HGNC Symbol;Acc:HGNC:19181]	protein_coding	13	188	11	47	24	103	6	140	68	453	123	145	87	107	108	79	22	209	15	195	3	146	101	284	57	84	143	274	14	348	8	9	15	73	37	4	23	8	31	3	1	0	28	78	12
ENSG00000234116	ENSG00000234116		novel transcript	lncRNA	0	13	0	11	3	9	0	0	0	0	0	0	0	0	0	0	0	9	0	7	0	23	0	11	0	0	0	14	0	11	0	0	0	0	0	7	0	0	0	0	0	0	0	1	4
ENSG00000231940	ENSG00000231940	RPS7P3	ribosomal protein S7 pseudogene 3 [Source:HGNC Symbol;Acc:HGNC:36518]	processed_pseudogene	3	3	3	6	4	5	6	7	2	5	3	9	4	3	3	4	0	10	0	14	3	9	8	9	1	5	2	6	7	9	1	3	1	8	2	3	2	1	4	0	0	0	3	3	3
ENSG00000198842	ENSG00000198842	STYXL2	serine/threonine/tyrosine interacting like 2 [Source:HGNC Symbol;Acc:HGNC:25034]	protein_coding	0	19	0	5	129	16	4	5	2	70	0	23	0	2	10	0	1	1	0	23	22	0	18	31	2	5	8	16	0	41	3	1	3	0	6	14	7	3	2	50	14	0	0	40	29
ENSG00000286619	ENSG00000286619		novel transcript, antisense to PM20D1	lncRNA	60	22	81	83	88	6	102	36	1	0	0	51	85	75	47	137	8	39	28	43	2	3	23	0	7	2	6	21	0	131	25	0	48	87	77	4	84	10	85	119	0	0	84	50	22
ENSG00000198756	ENSG00000198756	COLGALT2	collagen beta(1-O)galactosyltransferase 2 [Source:HGNC Symbol;Acc:HGNC:16790]	protein_coding	35	20	53	11	10	14	64	4	7	16	26	139	152	3	12	6	49	60	1	44	59	69	14	50	6	14	47	11	2	44	55	9	3	4	15	16	80	8	5	51	5	0	84	63	323
ENSG00000259823	ENSG00000259823	LYPD8	LY6/PLAUR domain containing 8 [Source:HGNC Symbol;Acc:HGNC:44208]	protein_coding	25	21	8	5	11	32	40	13	9	34	28	16	19	26	1	30	4	9	9	0	5	32	28	33	4	45	25	70	13	43	9	7	2	10	24	6	16	20	1	0	7	51	359	13	27
ENSG00000227554	ENSG00000227554		novel transcript	lncRNA	0	0	0	4	1	0	0	0	2	0	0	0	0	1	4	0	4	2	4	8	2	2	0	0	0	0	0	0	0	24	0	0	0	0	0	0	0	1	15	0	0	0	0	1	2
ENSG00000135749	ENSG00000135749	PCNX2	pecanex 2 [Source:HGNC Symbol;Acc:HGNC:8736]	protein_coding	15	45	20	46	98	51	19	17	28	92	70	12	25	21	17	7	22	24	9	85	12	115	40	4	25	40	47	54	71	95	37	25	10	28	129	30	27	31	50	20	0	8	119	132	109
ENSG00000143786	ENSG00000143786	CNIH3	cornichon family AMPA receptor auxiliary protein 3 [Source:HGNC Symbol;Acc:HGNC:26802]	protein_coding	46	42	14	29	210	45	66	30	12	98	34	16	11	35	51	17	14	55	15	72	146	171	97	28	27	30	42	52	93	67	30	8	20	84	8	23	42	69	65	31	4	109	6	43	34
ENSG00000054282	ENSG00000054282	SDCCAG8	SHH signaling and ciliogenesis regulator SDCCAG8 [Source:HGNC Symbol;Acc:HGNC:10671]	protein_coding	366	612	130	95	583	254	527	259	160	568	211	782	451	348	211	151	136	280	90	127	802	559	410	162	72	428	367	302	874	403	297	153	151	496	496	563	590	469	450	404	571	679	6	8	17
ENSG00000183780	ENSG00000183780	SLC35F3	solute carrier family 35 member F3 [Source:HGNC Symbol;Acc:HGNC:23616]	protein_coding	0	16	0	16	0	15	0	8	2	0	0	1	0	0	6	0	0	28	0	5	0	36	20	1	0	10	0	39	4	14	9	0	0	0	12	10	3	3	8	2	3	5	0	68	39
ENSG00000229663	ENSG00000229663	DPY19L4P1	DPY19L4 pseudogene 1 [Source:HGNC Symbol;Acc:HGNC:53907]	processed_pseudogene	1	11	0	24	2	24	3	16	0	2	0	0	5	1	3	0	5	20	0	36	0	23	7	2	9	0	16	17	1	0	3	15	2	0	0	16	0	14	1	3	1	5	13	19	7
ENSG00000162702	ENSG00000162702	ZNF281	zinc finger protein 281 [Source:HGNC Symbol;Acc:HGNC:13075]	protein_coding	970	976	242	132	1814	1000	1966	459	540	648	545	1567	897	419	394	608	428	1252	217	524	556	382	734	550	163	1930	720	995	1603	997	709	522	259	1522	531	1231	1523	1370	915	474	355	1594	26	31	5
ENSG00000238272	ENSG00000238272		novel transcript	lncRNA	4	3	1	0	1	0	15	0	0	0	10	0	0	0	7	0	0	5	1	11	0	14	4	0	0	1	0	3	0	0	6	0	0	0	0	0	0	0	0	12	0	0	0	0	2
ENSG00000235060	ENSG00000235060	VDAC1P4	voltage dependent anion channel 1 pseudogene 4 [Source:HGNC Symbol;Acc:HGNC:12675]	processed_pseudogene	4	7	7	9	1	3	0	1	5	27	0	1	1	1	2	0	0	1	1	2	13	2	14	1	8	0	2	5	2	17	2	5	0	11	74	23	1	6	21	0	0	13	19	8	4
ENSG00000143194	ENSG00000143194	MAEL	maelstrom spermatogenic transposon silencer [Source:HGNC Symbol;Acc:HGNC:25929]	protein_coding	0	15	5	17	6	14	1	10	6	2	0	1	0	2	7	4	4	21	3	44	33	37	4	6	2	1	9	20	0	26	4	2	4	0	4	1	3	0	32	6	0	0	0	36	12
ENSG00000229531	ENSG00000229531	RABGAP1L-AS1	RABGAP1L antisense RNA 1 [Source:HGNC Symbol;Acc:HGNC:41057]	lncRNA	0	1	0	7	1	19	1	1	4	30	0	0	3	0	10	0	4	8	3	17	2	28	2	17	16	4	0	7	0	0	0	0	0	0	10	2	0	0	1	3	0	0	15	1	8
ENSG00000271329	ENSG00000271329		metaxin 3 (MTX3) pseudogene	processed_pseudogene	0	3	3	8	3	6	7	4	10	0	0	0	0	0	7	5	5	3	0	2	13	12	0	11	19	0	4	11	0	3	2	3	0	1	40	22	0	0	2	2	1	0	0	4	0
ENSG00000054267	ENSG00000054267	ARID4B	AT-rich interaction domain 4B [Source:HGNC Symbol;Acc:HGNC:15550]	protein_coding	876	1232	331	411	1639	1039	1442	843	435	1317	786	3185	1066	1014	636	878	416	1705	290	864	1682	1147	1336	749	199	1388	836	1261	2466	1807	690	838	371	1955	1180	2023	1157	1078	1323	952	2463	1547	5440	56	749
ENSG00000177800	ENSG00000177800	TMEM78	transmembrane protein 78 [Source:HGNC Symbol;Acc:HGNC:32307]	lncRNA	1	9	0	1	6	5	0	0	1	0	0	2	0	0	5	4	2	31	0	25	2	18	0	0	1	0	5	4	6	24	1	0	1	1	1	1	1	0	0	1	2	1	0	18	13
ENSG00000175137	ENSG00000175137	SH3BP5L	SH3 binding domain protein 5 like [Source:HGNC Symbol;Acc:HGNC:29360]	protein_coding	166	133	41	36	464	272	443	157	153	176	129	213	112	95	64	58	123	266	79	104	107	285	203	85	29	176	207	159	231	280	195	67	58	294	26	5	265	18	85	139	5	0	55	56	184
ENSG00000134245	ENSG00000134245	WNT2B	Wnt family member 2B [Source:HGNC Symbol;Acc:HGNC:12781]	protein_coding	27	58	34	70	101	158	53	54	44	238	95	100	37	23	66	15	20	109	31	240	94	328	102	38	57	52	40	138	357	101	151	29	25	50	458	21	16	8	291	9	13	3	99	96	111
ENSG00000227373	ENSG00000227373	RABGAP1L-DT	RABGAP1L divergent transcript [Source:HGNC Symbol;Acc:HGNC:54296]	lncRNA	9	47	0	14	6	34	5	9	8	5	2	48	8	27	17	1	7	12	4	67	7	54	9	19	20	15	10	10	5	21	7	1	1	7	9	7	1	10	37	10	2	0	14	77	10
ENSG00000228175	ENSG00000228175	GEMIN8P4	gem nuclear organelle associated protein 8 pseudogene 4 [Source:HGNC Symbol;Acc:HGNC:37979]	processed_pseudogene	0	32	0	19	3	24	5	16	0	44	0	0	4	6	8	16	0	12	2	15	5	12	0	13	0	16	9	5	0	35	1	0	4	7	4	4	33	1	13	1	5	0	0	0	4
ENSG00000069275	ENSG00000069275	NUCKS1	nuclear casein kinase and cyclin dependent kinase substrate 1 [Source:HGNC Symbol;Acc:HGNC:29923]	protein_coding	306	725	163	158	988	258	328	330	308	408	490	1244	826	445	476	546	141	655	189	309	836	592	1113	559	143	876	583	428	2057	865	591	191	205	426	1231	286	442	675	800	517	554	247	508	93	517
ENSG00000143674	ENSG00000143674	MAP3K21	mitogen-activated protein kinase kinase kinase 21 [Source:HGNC Symbol;Acc:HGNC:29798]	protein_coding	21	31	0	10	37	73	16	4	23	17	12	8	0	25	29	0	0	52	0	69	0	59	48	80	5	89	16	87	6	24	4	28	5	6	0	48	1	7	64	124	3	0	0	20	22
ENSG00000187889	ENSG00000187889	FYB2	FYN binding protein 2 [Source:HGNC Symbol;Acc:HGNC:27295]	protein_coding	2	3	0	9	25	23	0	5	2	23	0	7	0	1	8	0	3	12	1	107	14	45	15	0	7	12	2	36	13	14	1	6	0	7	2	37	2	1	8	20	2	0	0	26	10
ENSG00000134375	ENSG00000134375	TIMM17A	translocase of inner mitochondrial membrane 17A [Source:HGNC Symbol;Acc:HGNC:17315]	protein_coding	744	2660	267	498	840	948	1399	1135	403	1671	501	2821	1094	1432	451	1183	133	1773	244	749	1750	2495	1160	1396	115	1542	621	1524	1899	1958	565	973	423	3559	993	1891	584	1359	815	1973	4251	3343	57	30	708
ENSG00000097046	ENSG00000097046	CDC7	cell division cycle 7 [Source:HGNC Symbol;Acc:HGNC:1745]	protein_coding	48	324	72	72	23	26	68	165	63	420	1	286	71	274	22	57	76	494	16	139	67	184	141	304	55	345	204	218	249	383	36	90	20	313	5	5	215	869	15	58	406	0	45	11	9
ENSG00000282718	ENSG00000282718		novel transcript	lncRNA	1	4	0	0	0	2	0	0	0	3	0	0	0	0	0	0	7	16	0	6	0	3	1	1	0	1	9	0	1	9	1	1	0	10	0	4	2	2	0	0	0	0	0	0	1
ENSG00000235605	ENSG00000235605		ribosomal protein S15 (RPS15) pseudogene	processed_pseudogene	9	33	3	11	14	21	12	9	9	16	2	31	14	11	37	11	10	32	5	22	22	59	14	16	7	34	6	25	19	15	18	11	5	42	26	3	4	146	7	42	1	5	8	1	0
ENSG00000223525	ENSG00000223525	RABGAP1L-IT1	RABGAP1L intronic transcript 1 [Source:HGNC Symbol;Acc:HGNC:41471]	lncRNA	3	11	2	16	4	8	0	0	5	6	0	0	4	1	6	0	6	19	0	23	0	46	10	4	11	23	5	20	1	17	5	0	4	9	93	0	1	1	8	5	0	0	0	4	13
ENSG00000224857	ENSG00000224857	LINC01691	long intergenic non-protein coding RNA 1691 [Source:HGNC Symbol;Acc:HGNC:52479]	lncRNA	0	4	0	11	18	8	0	5	1	0	0	1	0	0	1	0	0	25	0	25	0	0	15	1	0	0	4	9	0	0	0	0	0	0	0	0	0	0	0	0	0	0	0	0	2
ENSG00000231605	ENSG00000231605	LINC01363	long intergenic non-protein coding RNA 1363 [Source:HGNC Symbol;Acc:HGNC:50598]	lncRNA	0	1	0	4	8	10	0	2	1	3	0	0	0	0	4	0	3	11	0	3	0	55	1	0	7	23	1	7	6	0	0	2	0	0	9	1	1	0	3	0	0	0	70	15	22
ENSG00000236358	ENSG00000236358		novel transcript	lncRNA	6	24	2	3	8	18	11	8	6	16	2	31	14	11	13	10	8	25	2	11	22	29	8	16	5	15	4	22	18	13	16	9	5	30	1	3	2	90	2	30	1	4	6	3	3
ENSG00000238003	ENSG00000238003	RPL10P4	ribosomal protein L10 pseudogene 4 [Source:HGNC Symbol;Acc:HGNC:52342]	processed_pseudogene	0	9	0	16	3	4	2	1	2	11	0	1	1	0	8	1	1	5	0	5	1	0	2	1	6	5	0	10	4	0	0	0	0	2	4	1	0	0	0	0	0	1	0	0	0
ENSG00000287008	ENSG00000287008		novel transcript	lncRNA	5	4	2	14	13	9	3	8	6	9	0	2	2	0	18	1	4	13	3	15	18	20	2	12	11	13	12	18	9	5	4	1	1	2	4	1	0	1	11	0	0	0	0	12	1
ENSG00000185420	ENSG00000185420	SMYD3	SET and MYND domain containing 3 [Source:HGNC Symbol;Acc:HGNC:15513]	protein_coding	148	169	59	54	613	177	397	89	100	265	202	248	113	255	169	172	77	196	69	117	338	177	295	150	72	259	139	237	333	269	109	48	94	358	232	445	69	4	314	188	1	387	15	11	21
ENSG00000076321	ENSG00000076321	KLHL20	kelch like family member 20 [Source:HGNC Symbol;Acc:HGNC:25056]	protein_coding	194	529	319	146	785	231	1121	324	277	585	557	926	757	466	351	165	195	471	140	278	825	654	861	294	119	272	264	278	858	546	388	242	243	681	47	16	491	259	662	295	552	0	0	7	26
ENSG00000135778	ENSG00000135778	NTPCR	nucleoside-triphosphatase, cancer-related [Source:HGNC Symbol;Acc:HGNC:28204]	protein_coding	312	410	117	153	891	226	370	146	143	418	284	614	281	309	213	235	132	328	82	196	489	352	642	318	35	216	259	317	886	306	206	123	151	369	444	446	159	361	624	549	671	1227	2911	82	325
ENSG00000250536	ENSG00000250536	ABHD17AP3	ABHD17A pseudogene 3 [Source:HGNC Symbol;Acc:HGNC:34041]	unprocessed_pseudogene	1	2	0	1	3	1	3	1	1	6	8	3	0	0	10	1	0	1	0	0	1	2	2	4	6	1	1	3	4	9	7	4	0	1	1	5	3	5	3	1	1	3	35	22	14
ENSG00000229747	ENSG00000229747		phosphatidylinositol transfer protein, cytoplasmic 1 (PITPNC1) pseudogene	processed_pseudogene	0	1	0	9	1	0	0	0	1	5	0	0	0	0	0	0	1	12	0	5	0	0	0	0	4	1	2	1	5	0	0	0	0	2	0	1	0	0	8	0	0	0	0	4	3
ENSG00000117280	ENSG00000117280	RAB29	RAB29, member RAS oncogene family [Source:HGNC Symbol;Acc:HGNC:9789]	protein_coding	401	737	222	338	1411	864	653	522	271	593	912	4145	745	898	408	848	181	1546	162	771	701	772	825	803	51	825	397	926	1292	2149	514	1057	257	2176	336	1264	674	1016	601	608	0	1617	22	32	223
ENSG00000233985	ENSG00000233985	LINC01681	long intergenic non-protein coding RNA 1681 [Source:HGNC Symbol;Acc:HGNC:52468]	lncRNA	4	20	4	13	17	13	8	6	6	14	0	0	1	2	28	1	6	13	1	12	6	42	10	5	11	8	7	37	4	19	5	1	2	7	1	2	15	5	3	8	0	1	17	7	18
ENSG00000287423	ENSG00000287423		novel transcript	lncRNA	0	2	0	3	0	1	0	0	0	3	0	0	0	0	8	0	0	1	0	8	0	19	7	0	0	0	0	0	3	0	0	0	0	0	1	3	1	1	1	0	1	0	0	45	2
ENSG00000286774	ENSG00000286774		novel transcript	lncRNA	0	4	0	13	1	2	14	3	1	2	0	0	0	0	18	0	0	23	0	14	0	2	3	2	0	1	0	3	0	5	3	2	0	0	0	5	0	0	2	0	0	0	0	0	12
ENSG00000236719	ENSG00000236719	OVAAL	ovarian adenocarcinoma amplified long non-coding RNA [Source:HGNC Symbol;Acc:HGNC:49422]	lncRNA	0	8	0	4	11	32	0	1	3	10	0	12	0	2	5	0	2	10	3	29	6	8	10	2	3	5	11	12	16	0	10	12	3	0	51	5	1	0	20	5	2	0	6	0	6
ENSG00000136636	ENSG00000136636	KCTD3	potassium channel tetramerization domain containing 3 [Source:HGNC Symbol;Acc:HGNC:21305]	protein_coding	695	1211	430	172	1702	414	933	551	442	1101	675	1086	1201	865	505	820	439	433	324	392	3442	624	1669	744	172	758	403	555	3655	1106	762	136	386	925	1075	5	1135	142	1132	447	4148	982	18	3	221
ENSG00000227043	ENSG00000227043	LINC01682	long intergenic non-protein coding RNA 1682 [Source:HGNC Symbol;Acc:HGNC:52470]	lncRNA	0	23	0	0	3	12	0	0	3	0	0	0	1	0	1	0	0	3	2	4	6	0	0	11	3	4	8	6	0	11	2	0	0	1	0	3	4	1	1	0	2	0	0	29	51
ENSG00000163874	ENSG00000163874	ZC3H12A	zinc finger CCCH-type containing 12A [Source:HGNC Symbol;Acc:HGNC:26259]	protein_coding	132	114	60	62	151	173	232	74	76	93	115	691	443	187	118	212	54	252	54	79	334	314	169	144	26	287	110	179	416	490	117	365	64	508	612	353	318	2	114	283	6	0	26	278	23
ENSG00000285777	ENSG00000285777		novel protein	protein_coding	5	2	6	1	0	3	84	7	3	23	15	0	1	49	0	1	12	23	4	23	59	6	41	7	1	53	4	20	4	20	15	4	3	18	1	1	38	0	4	9	0	0	5	8	6
ENSG00000237249	ENSG00000237249		transmembrane protein 56 (TMEM56) pseudogene	processed_pseudogene	0	2	4	7	5	7	0	4	7	0	0	0	0	0	1	0	5	13	3	18	5	9	8	1	4	1	6	13	0	3	5	2	2	3	1	0	0	0	19	0	0	0	0	0	5
ENSG00000286109	ENSG00000286109		novel transcript	lncRNA	0	6	5	2	19	39	1	9	0	84	0	8	0	6	6	0	5	31	0	9	0	2	5	1	7	13	1	8	0	38	14	0	1	0	1	5	4	2	1	0	0	0	64	18	0
ENSG00000054392	ENSG00000054392	HHAT	hedgehog acyltransferase [Source:HGNC Symbol;Acc:HGNC:18270]	protein_coding	12	25	44	41	23	105	16	18	14	76	0	87	31	1	89	13	27	33	2	88	45	108	45	28	25	11	10	82	89	76	48	14	9	22	112	10	15	46	44	28	3	7	60	18	54
ENSG00000225711	ENSG00000225711		UDP-Gal:betaGlcNAc beta 1,3-galactosyltransferase, polypeptide 3 (B3GALT3) pseudogene	processed_pseudogene	2	2	0	4	8	2	0	3	3	36	0	3	0	0	33	1	0	9	1	6	1	1	10	0	5	1	2	13	1	36	0	0	0	0	2	1	0	0	1	0	2	0	0	0	3
ENSG00000122223	ENSG00000122223	CD244	CD244 molecule [Source:HGNC Symbol;Acc:HGNC:18171]	protein_coding	65	76	2	60	48	68	47	6	27	163	160	1063	80	152	46	137	15	29	15	102	59	286	118	110	13	104	54	79	27	224	23	29	17	236	5	6	58	12	68	211	3	7	17	75	83
ENSG00000235869	ENSG00000235869		ribosomal protein S26 (RPS26) pseudogene	processed_pseudogene	0	0	0	3	0	0	0	1	1	0	0	0	0	0	0	0	0	7	1	12	0	0	0	0	2	0	2	13	0	3	4	0	0	0	0	1	0	0	0	0	0	0	0	5	4
ENSG00000188739	ENSG00000188739	RBM34	RNA binding motif protein 34 [Source:HGNC Symbol;Acc:HGNC:28965]	protein_coding	389	551	171	251	753	354	566	423	179	804	296	1121	528	511	336	326	152	629	103	260	675	550	656	313	59	474	265	560	1081	796	298	293	200	1332	446	1146	719	852	680	707	2457	1231	2966	31	598
ENSG00000135750	ENSG00000135750	KCNK1	potassium two pore domain channel subfamily K member 1 [Source:HGNC Symbol;Acc:HGNC:6272]	protein_coding	2	10	0	10	3	10	34	0	2	17	0	18	7	1	14	0	26	36	0	26	17	4	1	1	13	25	3	29	0	6	0	0	0	8	12	8	2	2	25	2	0	0	6	71	248
ENSG00000203730	ENSG00000203730	TEDDM1	transmembrane epididymal protein 1 [Source:HGNC Symbol;Acc:HGNC:30233]	protein_coding	0	24	1	4	51	10	3	9	0	1	0	2	0	1	0	0	0	30	0	30	6	45	1	2	3	20	4	10	0	2	3	2	0	3	16	313	1	4	5	5	0	0	0	31	21
ENSG00000203729	ENSG00000203729	LINC00272	long intergenic non-protein coding RNA 272 [Source:HGNC Symbol;Acc:HGNC:26898]	lncRNA	0	7	0	0	0	0	0	0	0	1	0	0	0	1	0	2	1	1	0	0	4	0	0	0	0	6	0	4	0	0	0	0	0	0	1	1	0	0	0	0	0	0	26	11	1
ENSG00000284623	ENSG00000284623	LINC02786	long intergenic non-protein coding RNA 2786 [Source:HGNC Symbol;Acc:HGNC:54307]	lncRNA	1	1	0	1	1	7	0	0	0	4	0	0	1	5	0	0	0	9	0	9	0	0	12	4	1	5	3	4	3	9	0	3	0	0	0	8	0	0	2	5	0	7	0	15	8
ENSG00000229228	ENSG00000229228	LINC00582	long intergenic non-protein coding RNA 582 [Source:HGNC Symbol;Acc:HGNC:43842]	lncRNA	0	4	0	8	0	1	1	4	0	23	10	20	0	0	22	29	2	21	3	17	0	1	32	12	10	9	0	2	0	9	8	5	0	4	0	0	0	0	1	0	0	0	0	0	3
ENSG00000185221	ENSG00000185221	GAPDHP24	glyceraldehyde 3 phosphate dehydrogenase pseudogene 24 [Source:HGNC Symbol;Acc:HGNC:37776]	processed_pseudogene	0	1	0	0	0	1	0	0	0	4	0	11	0	0	0	0	0	0	0	6	0	5	5	0	0	13	0	0	0	0	0	0	0	0	0	0	0	1	0	0	0	2	0	0	7
ENSG00000233047	ENSG00000233047	LINC01677	long intergenic non-protein coding RNA 1677 [Source:HGNC Symbol;Acc:HGNC:52465]	lncRNA	0	0	0	14	8	1	0	1	3	0	0	0	0	0	0	0	4	5	0	26	2	25	5	0	0	5	0	3	0	4	0	0	1	12	1	2	3	1	11	19	0	0	13	15	8
ENSG00000143341	ENSG00000143341	HMCN1	hemicentin 1 [Source:HGNC Symbol;Acc:HGNC:19194]	protein_coding	52	89	16	45	112	36	17	14	39	56	7	3	88	8	46	11	4	38	0	138	14	63	58	6	20	38	19	85	599	44	33	14	13	29	74	47	97	4	32	13	9	3	23	84	48
ENSG00000228309	ENSG00000228309	LINC01350	long intergenic non-protein coding RNA 1350 [Source:HGNC Symbol;Acc:HGNC:50575]	lncRNA	3	4	0	6	0	6	0	2	0	2	0	1	0	3	0	0	0	2	0	15	0	0	0	7	2	14	0	5	0	0	0	1	0	0	2	0	0	0	0	8	0	0	118	7	10
ENSG00000229739	ENSG00000229739	PDC-AS1	PDC antisense RNA 1 [Source:HGNC Symbol;Acc:HGNC:40432]	lncRNA	3	34	5	30	35	36	0	7	11	9	1	11	13	3	48	0	30	28	2	77	23	137	21	20	39	18	25	8	16	44	24	9	3	8	13	17	8	11	39	1	2	0	4	12	13
ENSG00000278791	ENSG00000278791			miRNA	2	2	4	0	14	1	11	0	4	6	1	0	5	0	4	7	5	0	2	14	13	2	17	4	0	4	6	2	16	16	8	0	4	1	0	0	4	1	2	12	3	4	4	0	0
ENSG00000265141	ENSG00000265141	RN7SL451P	RNA, 7SL, cytoplasmic 451, pseudogene [Source:HGNC Symbol;Acc:HGNC:46467]	misc_RNA	3	15	0	2	0	6	0	5	0	1	0	0	0	0	7	0	0	3	0	6	0	0	15	2	6	0	0	2	0	2	3	0	0	9	2	0	0	1	0	0	7	0	0	1	2
ENSG00000252404	ENSG00000252404			scaRNA	0	5	2	1	0	8	3	3	1	3	0	4	1	0	0	3	2	9	0	9	0	14	0	3	6	1	2	8	8	7	1	1	0	2	15	0	1	0	2	0	0	0	0	0	40
ENSG00000274258	ENSG00000274258	MIR6728	microRNA 6728 [Source:HGNC Symbol;Acc:HGNC:49961]	miRNA	1	34	2	7	1	15	12	13	2	28	6	27	12	39	14	17	3	42	1	7	5	39	6	19	0	19	12	30	18	30	6	6	5	46	2	9	2	4	4	18	3	15	3	2	0
ENSG00000252417	ENSG00000252417	RNU7-179P	RNA, U7 small nuclear 179 pseudogene [Source:HGNC Symbol;Acc:HGNC:45713]	snRNA	0	1	0	0	2	0	0	0	4	5	0	0	0	0	1	0	0	0	0	3	0	0	1	2	4	0	0	2	0	0	2	4	0	2	17	1	0	0	2	0	0	0	0	0	2
ENSG00000200975	ENSG00000200975	RNU1-7P	RNA, U1 small nuclear 7, pseudogene [Source:HGNC Symbol;Acc:HGNC:48306]	snRNA	1	2	1	3	3	18	0	2	4	16	2	0	2	0	8	5	2	0	2	1	9	32	0	2	11	0	5	9	4	0	1	0	0	2	0	0	0	7	0	0	1	0	0	0	1
ENSG00000222784	ENSG00000222784	RN7SKP91	RN7SK pseudogene 91 [Source:HGNC Symbol;Acc:HGNC:45815]	misc_RNA	1	7	0	0	1	0	1	0	5	14	0	0	0	4	8	14	6	6	0	2	1	21	0	1	0	0	1	9	0	39	0	0	0	0	0	0	23	0	0	0	0	0	0	3	0
ENSG00000266210	ENSG00000266210	RN7SL371P	RNA, 7SL, cytoplasmic 371, pseudogene [Source:HGNC Symbol;Acc:HGNC:46387]	misc_RNA	0	4	6	4	0	12	0	0	4	1	0	0	1	0	2	0	0	1	0	2	0	4	2	2	2	2	2	2	0	0	2	1	1	1	0	0	0	0	1	2	0	0	0	5	8
ENSG00000200421	ENSG00000200421	Y_RNA	Y RNA [Source:RFAM;Acc:RF00019]	misc_RNA	0	2	0	4	5	0	1	0	3	3	0	0	2	0	8	0	2	0	0	1	3	6	2	0	2	3	1	5	5	16	2	1	1	0	0	0	3	0	17	0	0	0	3	0	2
ENSG00000212541	ENSG00000212541	RNU6-510P	RNA, U6 small nuclear 510, pseudogene [Source:HGNC Symbol;Acc:HGNC:47473]	snRNA	1	3	1	0	9	1	0	2	1	2	0	0	3	2	6	0	2	5	0	7	2	1	1	3	5	0	1	2	0	1	0	3	0	0	1	5	7	12	9	0	0	0	0	2	0
ENSG00000264613	ENSG00000264613	RN7SL290P	RNA, 7SL, cytoplasmic 290, pseudogene [Source:HGNC Symbol;Acc:HGNC:46306]	misc_RNA	2	16	0	0	0	0	0	0	0	0	0	0	0	0	0	0	0	0	0	15	0	11	0	0	7	0	0	0	0	0	3	0	0	29	0	0	0	0	1	0	0	0	0	24	0
ENSG00000284410	ENSG00000284410	MIR6733	microRNA 6733 [Source:HGNC Symbol;Acc:HGNC:50239]	miRNA	0	5	0	0	9	2	2	2	0	3	0	3	0	0	1	4	1	5	0	6	7	7	3	5	1	5	0	2	8	4	2	0	0	8	10	2	1	1	5	3	12	13	62	0	9
ENSG00000265822	ENSG00000265822	MIR4422	microRNA 4422 [Source:HGNC Symbol;Acc:HGNC:41654]	miRNA	0	2	0	9	20	0	2	2	1	4	0	0	0	1	4	0	1	0	1	16	0	5	4	5	4	3	0	4	3	0	0	0	0	4	29	0	7	0	17	0	2	0	0	0	0
ENSG00000242860	ENSG00000242860	RN7SL180P	RNA, 7SL, cytoplasmic 180, pseudogene [Source:HGNC Symbol;Acc:HGNC:46196]	misc_RNA	0	14	6	12	5	11	2	8	9	0	0	0	0	1	5	3	1	1	2	3	3	28	12	1	4	12	3	4	0	10	2	1	0	6	42	0	0	0	13	0	0	0	0	5	1
ENSG00000239319	ENSG00000239319	RN7SL854P	RNA, 7SL, cytoplasmic 854, pseudogene [Source:HGNC Symbol;Acc:HGNC:46870]	misc_RNA	1	9	0	9	2	13	1	1	0	1	0	0	1	1	2	0	1	4	0	2	0	1	3	0	3	8	2	1	0	0	3	1	0	0	0	0	0	0	6	0	1	0	0	0	1
ENSG00000243437	ENSG00000243437	RN7SL370P	RNA, 7SL, cytoplasmic 370, pseudogene [Source:HGNC Symbol;Acc:HGNC:46386]	misc_RNA	2	9	1	3	17	13	0	1	2	3	0	0	0	0	3	1	0	6	0	3	3	12	9	0	4	0	5	3	20	5	0	1	0	0	2	0	17	0	0	0	0	0	0	0	0
ENSG00000199666	ENSG00000199666	SNORD3G	small nucleolar RNA, C/D box 3G [Source:HGNC Symbol;Acc:HGNC:52240]	snoRNA	0	2	6	7	6	5	0	1	2	18	0	5	1	2	5	0	10	22	0	1	0	6	6	1	5	7	4	9	7	14	2	1	1	6	4	1	0	9	1	1	0	0	1	0	1
ENSG00000242482	ENSG00000242482	RN7SL392P	RNA, 7SL, cytoplasmic 392, pseudogene [Source:HGNC Symbol;Acc:HGNC:46408]	misc_RNA	0	1	1	8	13	4	0	7	6	8	0	0	0	0	7	1	0	12	2	4	0	15	7	9	2	0	4	11	18	34	0	0	0	8	0	0	0	14	2	0	0	0	0	0	3
ENSG00000244256	ENSG00000244256	RN7SL130P	RNA, 7SL, cytoplasmic 130, pseudogene [Source:HGNC Symbol;Acc:HGNC:46146]	misc_RNA	0	28	5	7	4	7	4	1	3	11	0	1	0	2	18	1	0	2	0	8	0	74	3	0	5	25	2	22	10	0	0	7	0	1	6	0	1	0	0	30	0	0	0	0	0
ENSG00000283899	ENSG00000283899	MIR761	microRNA 761 [Source:HGNC Symbol;Acc:HGNC:37305]	miRNA	16	32	7	0	18	4	16	8	10	22	6	33	19	14	0	12	4	24	1	8	9	18	3	20	5	28	15	9	21	33	11	19	5	30	0	51	0	0	7	8	0	139	0	0	0
ENSG00000252797	ENSG00000252797	RN7SKP272	RN7SK pseudogene 272 [Source:HGNC Symbol;Acc:HGNC:45996]	misc_RNA	0	10	1	1	0	2	0	1	0	0	0	1	3	0	9	1	4	5	0	9	7	0	0	6	0	5	2	2	2	0	0	0	2	6	0	0	0	0	9	0	0	0	0	1	0
ENSG00000239984	ENSG00000239984	RN7SL420P	RNA, 7SL, cytoplasmic 420, pseudogene [Source:HGNC Symbol;Acc:HGNC:46436]	misc_RNA	0	8	0	1	3	16	5	0	1	7	0	0	0	1	1	0	2	15	0	1	0	0	10	0	2	1	1	0	0	4	10	3	0	1	0	5	0	0	0	2	0	0	0	4	0
ENSG00000283575	ENSG00000283575	U6	U6 spliceosomal RNA [Source:RFAM;Acc:RF00026]	snRNA	0	6	0	2	0	0	0	0	0	1	0	0	0	0	1	0	0	0	0	0	0	0	0	11	3	0	0	0	0	2	0	0	0	0	22	0	0	1	4	0	0	0	0	0	4
ENSG00000264916	ENSG00000264916	RN7SL230P	RNA, 7SL, cytoplasmic 230, pseudogene [Source:HGNC Symbol;Acc:HGNC:46246]	misc_RNA	0	9	2	1	16	21	1	1	4	8	0	0	0	1	6	0	4	7	4	3	3	18	0	5	8	4	4	5	4	8	3	2	4	5	0	0	10	0	4	0	0	0	0	1	0
ENSG00000212338	ENSG00000212338			snoRNA	1	2	0	0	0	2	0	0	1	2	0	0	4	1	6	0	3	0	0	6	1	6	3	0	6	0	5	3	0	7	9	0	0	0	0	0	0	0	0	0	0	0	0	0	0
ENSG00000206659	ENSG00000206659	Y_RNA	Y RNA [Source:RFAM;Acc:RF00019]	misc_RNA	0	0	0	0	1	6	0	1	0	0	0	0	0	0	0	2	0	1	0	3	3	0	1	0	2	2	1	3	1	0	0	1	0	1	6	0	1	2	1	0	0	0	0	0	0
ENSG00000202498	ENSG00000202498	SNORD116	Small nucleolar RNA SNORD116 [Source:RFAM;Acc:RF00108]	snoRNA	0	7	1	4	2	2	0	2	0	13	0	0	0	0	5	0	3	1	0	4	18	0	1	0	9	8	0	6	4	7	1	0	0	0	38	3	0	0	5	0	0	0	0	0	2
ENSG00000212144	ENSG00000212144	U8	U8 small nucleolar RNA [Source:RFAM;Acc:RF00096]	snoRNA	0	2	0	10	0	4	0	0	3	12	0	0	1	2	0	0	0	0	0	7	0	7	1	0	6	4	2	12	0	22	10	1	0	0	0	0	0	0	13	0	0	0	0	0	0
ENSG00000283936	ENSG00000283936	MIR3658	microRNA 3658 [Source:HGNC Symbol;Acc:HGNC:38963]	miRNA	15	118	9	15	65	41	42	76	16	126	25	91	45	120	19	32	7	104	8	57	48	65	42	86	10	108	73	126	59	142	24	47	12	131	36	1	32	110	59	97	0	149	1303	0	30
ENSG00000239690	ENSG00000239690	RN7SL668P	RNA, 7SL, cytoplasmic 668, pseudogene [Source:HGNC Symbol;Acc:HGNC:46684]	misc_RNA	0	0	0	7	0	0	0	0	0	0	0	0	0	0	0	0	0	1	0	8	0	4	0	0	0	0	0	0	0	0	1	0	0	0	37	0	0	0	2	0	0	0	0	0	0
ENSG00000202300	ENSG00000202300	RNU6-487P	RNA, U6 small nuclear 487, pseudogene [Source:HGNC Symbol;Acc:HGNC:47450]	snRNA	0	7	2	6	0	1	0	1	4	2	0	3	0	3	5	0	2	1	0	13	0	14	2	5	2	1	5	5	2	0	10	1	0	6	0	0	0	0	1	0	0	0	0	0	0
ENSG00000265435	ENSG00000265435	MIR3121	microRNA 3121 [Source:HGNC Symbol;Acc:HGNC:38259]	miRNA	0	8	0	6	0	0	0	0	1	0	0	0	0	0	0	0	0	5	0	0	0	0	0	4	0	0	0	4	1	0	0	1	0	0	0	0	0	3	4	0	0	0	0	0	2
ENSG00000272262	ENSG00000272262	RNU6-89P	RNA, U6 small nuclear 89, pseudogene [Source:HGNC Symbol;Acc:HGNC:47052]	snRNA	0	1	0	0	0	12	0	1	0	0	0	0	0	0	0	0	0	0	0	11	0	21	0	9	0	0	0	0	0	12	1	0	0	0	12	2	0	0	1	0	0	0	0	0	2
ENSG00000212187	ENSG00000212187			snoRNA	0	2	0	1	0	4	0	1	4	2	0	0	0	0	0	0	1	2	0	5	4	8	0	0	3	0	2	4	9	8	0	0	0	0	0	0	0	3	0	0	0	0	0	0	0
ENSG00000206637	ENSG00000206637	SNORA70H	small nucleolar RNA, H/ACA box 70H [Source:HGNC Symbol;Acc:HGNC:52214]	snoRNA	0	3	0	6	0	1	0	0	1	3	0	5	2	0	7	0	2	2	0	0	0	0	4	0	5	3	0	6	3	0	0	0	0	0	12	0	0	0	0	0	0	1	0	0	0
ENSG00000252011	ENSG00000252011			snoRNA	2	3	0	0	2	7	1	4	5	2	0	0	0	0	4	0	0	1	0	1	0	2	9	11	3	5	0	8	0	1	6	0	0	3	0	0	0	0	11	31	0	0	0	11	1
ENSG00000285609	ENSG00000285609	5S_rRNA	5S ribosomal RNA [Source:RFAM;Acc:RF00001]	rRNA_pseudogene	0	7	1	2	7	9	0	1	4	9	0	6	0	1	4	0	6	9	0	1	2	2	10	5	4	3	3	3	12	4	12	2	0	1	28	3	5	1	2	0	0	0	0	0	15
ENSG00000252084	ENSG00000252084	RN7SKP12	RN7SK pseudogene 12 [Source:HGNC Symbol;Acc:HGNC:45736]	misc_RNA	0	1	0	11	0	4	0	0	2	19	0	0	0	0	0	0	3	3	0	0	0	1	0	4	1	0	2	1	0	10	2	3	0	0	0	0	0	0	1	0	0	0	0	15	0
ENSG00000206990	ENSG00000206990	Y_RNA	Y RNA [Source:RFAM;Acc:RF00019]	misc_RNA	132	218	92	56	407	89	280	139	99	178	102	427	241	193	153	140	59	200	61	91	309	173	268	139	25	282	190	113	515	272	127	87	84	308	56	92	238	156	164	216	183	99	897	1	64
ENSG00000225272	ENSG00000225272		ribosomal protein L21 (RPL21) pseudogene	processed_pseudogene	0	2	0	12	1	0	0	1	0	8	0	0	0	0	4	0	0	14	0	3	1	37	0	0	0	7	0	5	1	8	0	0	0	1	0	1	0	0	0	0	0	0	58	0	4
ENSG00000215838	ENSG00000215838		carbonic anhydrase XIV (CA14) pseudogene	transcribed_processed_pseudogene	0	13	4	9	7	14	6	4	2	56	0	20	1	2	11	7	7	53	0	27	15	40	6	13	5	53	7	36	6	25	24	4	1	4	162	5	17	0	10	2	3	0	24	17	12
ENSG00000273365	ENSG00000273365		novel transcript	lncRNA	0	0	0	0	3	0	0	0	0	23	0	0	0	0	0	0	0	0	1	5	0	0	1	0	0	3	0	15	1	20	0	0	0	0	0	0	0	0	0	0	0	0	0	0	0
ENSG00000224358	ENSG00000224358	TMCO1-AS1	TMCO1 antisense RNA 1 [Source:HGNC Symbol;Acc:HGNC:54046]	lncRNA	0	3	17	2	1	10	2	4	8	0	0	3	2	2	4	0	0	40	1	20	24	16	7	1	9	0	13	29	3	10	18	4	3	8	1	5	0	0	13	9	0	0	2	18	1
ENSG00000162545	ENSG00000162545	CAMK2N1	calcium/calmodulin dependent protein kinase II inhibitor 1 [Source:HGNC Symbol;Acc:HGNC:24190]	protein_coding	22	3	23	1	223	8	110	2	24	24	20	52	146	34	111	2	22	2	9	2	126	18	159	10	8	15	16	2	232	24	81	3	41	23	201	1	92	0	205	1	13	1	14	163	117
ENSG00000090432	ENSG00000090432	MUL1	mitochondrial E3 ubiquitin protein ligase 1 [Source:HGNC Symbol;Acc:HGNC:25762]	protein_coding	252	157	42	53	508	113	367	89	118	103	69	538	162	144	160	175	98	226	13	84	149	363	269	95	47	97	191	268	508	89	111	126	74	475	6	8	154	3	197	270	0	1	0	5	28
ENSG00000215520	ENSG00000215520	RPS4XP4	ribosomal protein S4X pseudogene 4 [Source:HGNC Symbol;Acc:HGNC:36545]	processed_pseudogene	2	7	0	26	58	19	0	0	0	3	0	0	0	0	12	0	23	0	0	12	0	57	0	21	15	17	2	7	6	48	6	0	3	0	90	3	0	0	14	76	0	0	4	25	9
ENSG00000183114	ENSG00000183114	FAM43B	family with sequence similarity 43 member B [Source:HGNC Symbol;Acc:HGNC:31791]	protein_coding	3	0	5	0	0	0	21	0	1	0	29	0	14	1	7	0	0	4	0	0	6	0	13	4	0	1	0	1	22	3	3	0	2	0	1	10	91	0	31	0	5	1	5	43	145
ENSG00000158825	ENSG00000158825	CDA	cytidine deaminase [Source:HGNC Symbol;Acc:HGNC:1712]	protein_coding	5352	2913	790	355	4320	2571	7154	1272	2183	5225	2860	2880	2698	1844	783	2146	1883	1787	949	324	1744	2495	3569	1795	345	3743	3568	3784	3418	3300	1787	643	1291	4741	1320	2578	5985	2832	2260	1939	3759	6740	2020	2372	2403
ENSG00000158828	ENSG00000158828	PINK1	PTEN induced kinase 1 [Source:HGNC Symbol;Acc:HGNC:14581]	protein_coding	2274	2911	1072	1163	4531	1814	4877	2251	1551	5110	1816	2887	2751	1382	2082	3473	1356	1517	965	754	6486	3835	5841	3036	413	1738	1526	1500	6907	2886	2061	851	1340	4945	2129	2750	5999	3686	4070	1866	6791	1676	55	82	1272
ENSG00000284005	ENSG00000284005	MIR6084	microRNA 6084 [Source:HGNC Symbol;Acc:HGNC:50235]	miRNA	181	174	79	62	311	105	338	126	104	322	98	208	156	94	168	221	72	92	75	49	401	215	415	214	23	146	74	86	408	211	128	41	100	299	175	326	458	334	320	186	572	81	2	36	113
ENSG00000117242	ENSG00000117242	PINK1-AS	PINK1 antisense RNA [Source:HGNC Symbol;Acc:HGNC:38872]	lncRNA	1839	2512	882	996	3695	1455	4057	1870	1328	4316	1566	2455	2466	1267	1727	2790	1160	1339	816	640	5648	3286	4861	2488	355	1477	1328	1271	5867	2350	1735	761	1127	4220	1659	1918	4355	2733	3073	1257	4711	1515	0	32	868
ENSG00000134371	ENSG00000134371	CDC73	cell division cycle 73 [Source:HGNC Symbol;Acc:HGNC:16783]	protein_coding	908	2033	304	511	1843	1758	1494	799	568	2106	711	2195	1128	1252	732	889	443	2230	407	788	1238	1284	1852	1345	265	1594	979	1128	2383	2182	670	845	375	2800	356	1656	807	764	670	1018	963	1334	2469	30	943
ENSG00000162630	ENSG00000162630	B3GALT2	beta-1,3-galactosyltransferase 2 [Source:HGNC Symbol;Acc:HGNC:917]	protein_coding	0	5	1	0	0	1	0	0	4	4	0	37	65	0	7	0	0	0	4	22	0	5	1	0	1	1	2	3	6	0	0	7	0	0	6	0	0	0	4	0	0	0	0	2	12
ENSG00000232077	ENSG00000232077	LINC01031	long intergenic non-protein coding RNA 1031 [Source:HGNC Symbol;Acc:HGNC:49017]	lncRNA	5	19	0	11	4	21	6	3	2	23	0	0	0	1	2	0	8	24	2	44	0	5	1	0	2	2	0	7	0	20	1	1	1	0	67	6	1	0	6	21	0	0	33	0	7
ENSG00000287283	ENSG00000287283		novel transcript, antisense to LRRC7	lncRNA	0	3	0	12	4	9	0	0	2	5	0	1	1	4	25	0	6	9	4	19	0	8	11	14	9	20	13	1	0	42	0	9	0	6	10	141	0	18	21	0	0	0	0	32	7
ENSG00000229359	ENSG00000229359	PIN1P1	peptidylprolyl cis/trans isomerase, NIMA-interacting 1 pseudogene 1 [Source:HGNC Symbol;Acc:HGNC:8989]	transcribed_processed_pseudogene	0	0	0	2	0	15	1	1	3	1	0	0	0	0	1	0	0	0	0	0	0	0	2	0	0	0	2	10	1	0	0	1	0	0	7	3	0	0	1	0	0	0	0	19	2
ENSG00000066557	ENSG00000066557	LRRC40	leucine rich repeat containing 40 [Source:HGNC Symbol;Acc:HGNC:26004]	protein_coding	113	517	44	68	107	276	257	319	87	393	135	636	209	425	71	449	46	346	91	220	575	446	381	549	45	321	160	275	450	806	173	238	83	320	518	6	105	3	152	58	0	869	28	9	11
ENSG00000118454	ENSG00000118454	ANKRD13C	ankyrin repeat domain 13C [Source:HGNC Symbol;Acc:HGNC:25374]	protein_coding	283	695	159	142	831	295	508	286	156	585	252	1009	554	487	343	356	124	694	218	354	1081	680	637	462	55	460	317	215	1193	743	389	214	157	525	424	580	126	0	607	438	789	0	8	20	295
ENSG00000226088	ENSG00000226088	HHLA3-AS1	HHLA3 antisense RNA 1 [Source:HGNC Symbol;Acc:HGNC:40277]	lncRNA	0	24	0	0	0	8	0	0	0	5	0	0	0	0	17	0	0	0	0	22	0	35	0	2	7	1	0	3	0	3	0	1	0	0	0	41	0	0	2	0	0	3	0	0	9
ENSG00000116761	ENSG00000116761	CTH	cystathionine gamma-lyase [Source:HGNC Symbol;Acc:HGNC:2501]	protein_coding	2	80	37	29	4	13	72	4	8	16	57	71	268	165	56	43	15	137	9	78	174	31	38	46	14	327	15	83	286	94	71	26	24	3	291	66	167	0	4	0	669	0	3	0	12
ENSG00000271992	ENSG00000271992		novel transcript	lncRNA	0	6	0	18	0	14	1	0	0	0	0	0	5	0	2	13	1	3	0	12	0	0	3	0	0	7	0	6	0	9	3	0	0	0	18	2	4	3	0	0	0	0	62	13	1
ENSG00000007968	ENSG00000007968	E2F2	E2F transcription factor 2 [Source:HGNC Symbol;Acc:HGNC:3114]	protein_coding	51	530	14	118	219	559	36	250	28	400	132	252	105	335	26	118	62	648	4	411	42	339	442	627	73	545	230	362	225	739	26	80	49	530	337	622	74	584	183	503	7	20	87	46	47
ENSG00000235052	ENSG00000235052		novel transcript	lncRNA	5	2	0	0	0	3	0	2	0	0	0	0	0	0	1	0	0	22	0	16	0	0	0	3	2	2	0	0	4	1	0	1	0	1	0	0	0	0	0	0	0	0	0	0	2
ENSG00000117318	ENSG00000117318	ID3	inhibitor of DNA binding 3, HLH protein [Source:HGNC Symbol;Acc:HGNC:5362]	protein_coding	361	265	187	77	597	120	857	181	162	275	226	119	451	163	231	210	110	131	196	44	1076	358	980	113	59	115	151	55	702	76	264	52	313	329	753	942	1003	1162	1396	868	5184	797	3	1369	913
ENSG00000285802	ENSG00000285802		novel transcript	lncRNA	1	32	4	11	17	15	5	2	6	45	0	0	0	0	18	0	12	26	1	30	16	25	6	7	10	5	17	24	25	29	1	2	3	18	39	4	6	0	2	0	0	0	15	9	3
ENSG00000229239	ENSG00000229239	EEF1A1P48	eukaryotic translation elongation factor 1 alpha 1 pseudogene 48 [Source:HGNC Symbol;Acc:HGNC:56205]	unprocessed_pseudogene	0	13	3	10	18	26	1	2	10	4	0	4	0	0	13	0	2	21	0	5	5	23	0	3	3	6	8	1	0	6	5	0	3	1	5	7	1	1	1	14	0	0	0	59	7
ENSG00000142676	ENSG00000142676	RPL11	ribosomal protein L11 [Source:HGNC Symbol;Acc:HGNC:10301]	protein_coding	1432	2203	554	915	2976	1544	2243	1003	611	2027	1111	4043	1366	1807	780	1649	532	2221	608	692	2190	2228	2087	1606	261	1735	947	1533	2830	2077	958	849	797	4363	1602	2004	1612	2713	1653	3001	3762	5246	2327	1863	1288
ENSG00000057757	ENSG00000057757	PITHD1	PITH domain containing 1 [Source:HGNC Symbol;Acc:HGNC:25022]	protein_coding	360	1272	194	339	1440	762	814	461	265	1138	477	1675	658	662	388	509	274	1236	218	459	856	863	2114	1710	215	1080	495	773	1401	1220	467	369	370	1145	519	2010	807	618	859	999	2222	831	0	19	20
ENSG00000011009	ENSG00000011009	LYPLA2	lysophospholipase 2 [Source:HGNC Symbol;Acc:HGNC:6738]	protein_coding	776	1646	223	360	1043	1040	1146	700	393	1217	549	2283	748	1130	279	938	308	1089	244	484	901	1266	1012	788	95	1084	873	1265	1204	1934	500	562	327	2432	618	1648	878	2256	352	2329	748	2963	4	5	666
ENSG00000117308	ENSG00000117308	GALE	UDP-galactose-4-epimerase [Source:HGNC Symbol;Acc:HGNC:4116]	protein_coding	113	474	61	142	199	197	261	233	39	171	59	347	88	361	104	173	84	312	70	185	196	315	384	369	18	278	188	209	325	339	70	142	87	712	10	182	247	499	16	450	0	999	37	51	392
ENSG00000230260	ENSG00000230260		novel transcript	lncRNA	4	8	0	12	6	5	1	11	2	7	0	0	2	4	24	1	3	13	1	30	0	18	10	8	11	35	7	17	0	15	9	1	0	1	21	2	2	0	0	6	0	0	0	3	0
ENSG00000226919	ENSG00000226919		novel transcript, antisense to RGS7	lncRNA	2	2	0	0	0	0	0	2	2	0	29	0	4	0	0	2	1	0	2	5	0	40	1	5	0	0	1	0	0	21	1	1	0	0	9	2	0	1	0	0	0	1	0	19	49
ENSG00000224348	ENSG00000224348	RPL36P6	ribosomal protein L36 pseudogene 6 [Source:HGNC Symbol;Acc:HGNC:36046]	processed_pseudogene	0	10	0	12	0	16	0	14	1	5	0	2	0	0	11	0	0	17	0	21	0	52	9	13	1	19	1	23	0	17	3	5	0	5	2	1	0	2	4	0	0	0	23	0	0
ENSG00000286496	ENSG00000286496		novel transcript	lncRNA	0	2	1	10	6	46	0	3	11	5	0	11	1	0	1	0	1	9	2	33	5	35	8	4	3	15	5	25	2	26	1	1	0	1	42	3	1	1	2	1	1	0	9	38	16
ENSG00000287516	ENSG00000287516		novel transcript	lncRNA	0	38	4	26	33	29	6	12	5	10	0	4	23	5	29	0	3	18	0	56	6	74	32	10	18	25	16	41	10	63	16	6	3	32	18	22	12	9	50	3	5	0	53	119	47
ENSG00000287738	ENSG00000287738		novel transcript	lncRNA	0	7	1	3	32	6	0	11	1	0	0	0	3	1	37	0	0	2	0	20	0	22	6	0	10	14	2	21	0	2	1	0	0	1	3	3	0	1	21	5	0	0	1	4	15
ENSG00000132703	ENSG00000132703	APCS	amyloid P component, serum [Source:HGNC Symbol;Acc:HGNC:584]	protein_coding	0	2	0	0	0	0	69	0	2	55	47	86	0	1190	2	29	0	0	5	4	49	0	24	0	11	401	3	0	0	7	0	0	0	4	0	0	0	0	4	0	0	0	0	24	4
ENSG00000132693	ENSG00000132693	CRP	C-reactive protein [Source:HGNC Symbol;Acc:HGNC:2367]	protein_coding	0	7	9	13	22	32	15	6	2	3	0	7	43	1851	7	53	2	15	1	15	3	33	6	0	70	3495	5	9	0	19	18	9	0	5	16	4	5	1	5	3	4	0	0	3	15
ENSG00000158716	ENSG00000158716	DUSP23	dual specificity phosphatase 23 [Source:HGNC Symbol;Acc:HGNC:21480]	protein_coding	494	774	137	175	545	413	519	292	195	792	314	781	424	467	183	301	210	492	106	169	508	677	776	274	48	416	305	455	726	574	292	184	179	942	292	880	568	957	472	821	816	1372	1437	1403	617
ENSG00000181036	ENSG00000181036	FCRL6	Fc receptor like 6 [Source:HGNC Symbol;Acc:HGNC:31910]	protein_coding	0	16	24	2	105	3	43	77	35	18	610	2385	183	86	8	2	6	13	14	105	3	115	110	43	2	7	22	131	13	235	41	189	12	139	2	12	0	1	4	95	1	589	116	35	38
ENSG00000158714	ENSG00000158714	SLAMF8	SLAM family member 8 [Source:HGNC Symbol;Acc:HGNC:21391]	protein_coding	20	194	66	174	195	182	30	160	33	115	1	774	73	294	20	19	17	706	6	283	179	303	148	141	8	266	93	301	133	263	12	322	40	353	6	689	2	1	200	334	7	2	2	12	19
ENSG00000243284	ENSG00000243284	VSIG8	V-set and immunoglobulin domain containing 8 [Source:HGNC Symbol;Acc:HGNC:32063]	protein_coding	1	14	0	1	11	5	3	4	5	0	0	0	2	5	0	1	0	0	0	2	1	13	7	1	1	5	7	0	9	3	0	1	0	0	3	9	21	2	4	0	4	0	0	96	20
ENSG00000272668	ENSG00000272668		novel transcript, antisense to VSIG8	lncRNA	0	0	0	4	5	18	0	10	0	1	0	1	3	0	1	0	0	4	1	4	1	0	2	1	0	12	5	7	4	1	5	2	1	2	17	17	7	7	2	4	3	2	0	117	44
ENSG00000213085	ENSG00000213085	CFAP45	cilia and flagella associated protein 45 [Source:HGNC Symbol;Acc:HGNC:17229]	protein_coding	93	114	12	11	48	49	52	13	42	71	0	58	31	39	15	59	12	57	8	34	19	4	26	113	0	116	33	35	56	36	30	16	38	139	8	6	27	1	2	1	1	0	3	27	6
ENSG00000287040	ENSG00000287040		novel transcript	lncRNA	0	1	1	0	3	19	1	0	2	0	0	0	6	0	15	0	0	7	3	9	0	6	6	5	1	0	1	7	4	0	8	1	1	28	0	0	0	3	0	0	0	1	2	11	0
ENSG00000162723	ENSG00000162723	SLAMF9	SLAM family member 9 [Source:HGNC Symbol;Acc:HGNC:18430]	protein_coding	2	10	3	2	0	16	0	3	0	5	0	0	11	20	0	0	0	3	0	1	6	0	5	6	1	3	13	5	0	0	0	0	0	11	3	0	0	4	0	45	0	6	0	1	20
ENSG00000273933	ENSG00000273933		Fc receptor-like 6 (FCRL6) pseudogene	unprocessed_pseudogene	2	10	0	0	0	3	0	0	0	0	0	2	0	0	3	0	0	8	0	1	0	0	6	0	0	3	0	1	0	0	4	0	0	0	0	1	6	3	0	45	0	1	2	12	11
ENSG00000256029	ENSG00000256029		novel protein	protein_coding	31	191	59	152	215	184	41	159	40	109	1	637	71	234	10	33	2	640	6	276	145	293	161	162	15	265	98	274	105	257	17	296	44	323	12	490	24	15	185	262	3	0	30	108	49
ENSG00000188004	ENSG00000188004	SNHG28	small nucleolar RNA host gene 28 [Source:HGNC Symbol;Acc:HGNC:27647]	lncRNA	17	140	49	132	198	130	28	133	27	81	1	518	61	195	10	12	2	532	5	231	127	233	138	109	15	195	80	221	108	224	12	246	26	251	7	352	7	16	140	190	3	0	25	75	37
ENSG00000254545	ENSG00000254545		novel transcript	lncRNA	3	14	3	26	72	42	5	27	9	7	0	20	19	55	11	78	7	22	2	25	26	44	33	21	15	82	24	55	25	73	4	10	13	40	0	184	3	0	50	0	0	0	10	1	62
ENSG00000203620	ENSG00000203620		novel transcript	lncRNA	2	19	0	36	17	30	0	7	2	25	0	0	0	0	52	9	3	30	2	31	13	84	21	6	31	12	16	35	33	13	10	5	6	4	86	48	2	0	26	75	0	12	11	38	20
ENSG00000269967	ENSG00000269967		novel transcript	lncRNA	0	1	0	0	2	2	1	0	8	0	0	0	0	0	1	0	0	1	6	0	2	0	1	0	6	0	1	1	4	20	1	0	4	1	8	0	2	0	1	0	0	0	0	0	2
ENSG00000228634	ENSG00000228634		novel transcript	lncRNA	3	3	0	3	14	23	2	6	7	3	0	3	0	3	35	4	5	15	5	19	0	35	9	5	10	13	9	14	19	3	4	3	0	10	15	0	3	0	3	3	4	0	17	0	1
ENSG00000284702	ENSG00000284702		novel transcript	lncRNA	0	15	1	8	46	17	7	5	7	16	0	11	7	3	43	0	11	32	3	34	30	58	14	2	51	6	7	9	13	14	16	2	0	18	2	5	0	0	6	64	0	0	0	14	6
ENSG00000163399	ENSG00000163399	ATP1A1	ATPase Na+/K+ transporting subunit alpha 1 [Source:HGNC Symbol;Acc:HGNC:799]	protein_coding	139	521	149	307	992	680	320	330	220	772	339	496	751	489	401	719	190	535	89	277	834	625	793	405	35	593	299	340	1963	582	308	220	124	1008	674	197	631	162	994	977	266	169	60	29	101
ENSG00000233154	ENSG00000233154	LINC01762	long intergenic non-protein coding RNA 1762 [Source:HGNC Symbol;Acc:HGNC:52552]	lncRNA	0	1	0	5	15	10	0	1	0	12	0	4	16	3	0	19	3	17	0	20	2	4	0	5	3	9	3	11	5	13	12	0	5	8	27	1	2	2	24	0	0	1	11	33	17
ENSG00000224950	ENSG00000224950		novel transcript	lncRNA	0	10	0	10	19	8	3	5	0	46	0	32	0	17	1	2	3	15	0	7	1	36	1	3	1	11	3	1	1	21	8	8	4	5	9	2	2	9	3	1	0	0	102	27	9
ENSG00000286276	ENSG00000286276		novel transcript	lncRNA	2	0	0	2	0	12	1	1	0	10	0	12	0	4	0	2	0	5	0	1	0	21	0	5	0	0	0	8	0	2	0	4	0	5	2	0	0	6	0	0	0	0	0	5	3
ENSG00000177888	ENSG00000177888	ZBTB41	zinc finger and BTB domain containing 41 [Source:HGNC Symbol;Acc:HGNC:24819]	protein_coding	81	113	33	90	237	54	149	22	32	93	258	313	171	113	136	100	25	159	65	22	494	508	301	62	20	73	23	139	415	121	115	3	40	62	75	6	107	1	190	13	14	0	18	5	6
ENSG00000243364	ENSG00000243364	EFNA4	ephrin A4 [Source:HGNC Symbol;Acc:HGNC:3224]	protein_coding	18	9	4	5	0	37	19	3	7	10	0	25	11	11	3	52	11	12	1	8	22	9	46	2	6	20	5	37	17	14	32	0	7	31	135	5	4	3	36	13	5	0	12	38	14
ENSG00000251246	ENSG00000251246		novel ephrin-A4 (EFNA4) and ephrin-A3 (EFNA3) protein	protein_coding	9	10	2	2	2	15	12	4	0	0	4	13	3	3	0	8	6	10	0	3	0	1	10	5	0	13	2	5	4	1	7	0	2	8	50	4	2	4	7	0	0	0	44	18	12
ENSG00000143590	ENSG00000143590	EFNA3	ephrin A3 [Source:HGNC Symbol;Acc:HGNC:3223]	protein_coding	2	6	0	2	2	7	10	4	0	0	4	7	1	3	0	0	4	4	0	0	0	2	10	5	0	6	2	2	7	1	3	0	1	0	57	6	2	4	0	0	0	0	44	13	16
ENSG00000169242	ENSG00000169242	EFNA1	ephrin A1 [Source:HGNC Symbol;Acc:HGNC:3221]	protein_coding	187	203	132	41	254	114	509	81	89	212	94	124	156	585	102	23	25	30	102	45	627	235	550	67	46	237	38	15	614	106	127	27	104	154	390	10	80	3	181	499	3	200	23	8	363
ENSG00000169241	ENSG00000169241	SLC50A1	solute carrier family 50 member 1 [Source:HGNC Symbol;Acc:HGNC:30657]	protein_coding	204	616	77	184	591	500	382	388	137	744	269	1153	453	796	201	599	166	717	105	366	491	726	604	1036	103	1173	388	518	829	767	176	260	189	1160	378	632	407	700	358	925	327	1794	18	1699	16
ENSG00000163463	ENSG00000163463	KRTCAP2	keratinocyte associated protein 2 [Source:HGNC Symbol;Acc:HGNC:28942]	protein_coding	157	205	88	89	382	127	371	149	68	181	160	434	194	228	146	142	72	162	45	138	354	269	307	160	55	275	118	192	521	288	193	114	83	399	564	410	304	342	414	758	442	389	1103	1015	380
ENSG00000273088	ENSG00000273088		novel protein	protein_coding	155	179	84	81	352	96	367	132	59	157	160	417	176	218	117	129	60	148	43	122	343	219	282	154	39	243	96	151	460	289	156	112	83	396	519	399	289	316	358	734	441	388	1080	997	298
ENSG00000169231	ENSG00000169231	THBS3	thrombospondin 3 [Source:HGNC Symbol;Acc:HGNC:11787]	protein_coding	139	143	50	8	181	61	229	46	0	42	116	143	282	84	106	0	30	77	20	12	301	33	273	46	24	101	136	61	705	49	107	82	110	247	362	26	106	9	277	43	6	704	186	81	50
ENSG00000177628	ENSG00000177628	GBA	glucosylceramidase beta [Source:HGNC Symbol;Acc:HGNC:4177]	protein_coding	272	241	86	37	386	159	573	151	110	361	234	213	227	159	34	197	38	99	78	61	187	104	222	85	42	249	315	237	306	268	199	121	72	331	268	960	437	189	192	589	586	9	31	19	15
ENSG00000116521	ENSG00000116521	SCAMP3	secretory carrier membrane protein 3 [Source:HGNC Symbol;Acc:HGNC:10565]	protein_coding	61	364	47	131	223	260	323	130	52	397	189	899	169	273	185	264	65	217	59	107	187	320	250	188	36	281	107	187	625	349	223	147	92	594	605	14	157	440	365	459	2062	642	6	34	211
ENSG00000176444	ENSG00000176444	CLK2	CDC like kinase 2 [Source:HGNC Symbol;Acc:HGNC:2069]	protein_coding	39	106	32	53	129	155	165	123	62	190	61	210	163	124	107	191	45	150	47	58	239	155	268	99	11	112	135	200	236	454	179	71	24	416	335	7	46	208	292	232	210	602	14	35	6
ENSG00000143630	ENSG00000143630	HCN3	hyperpolarization activated cyclic nucleotide gated potassium channel 3 [Source:HGNC Symbol;Acc:HGNC:19183]	protein_coding	1	65	2	15	2	30	0	19	5	53	7	26	0	11	0	9	1	112	0	41	1	1	9	65	1	96	7	27	7	107	6	20	0	38	16	12	3	58	5	6	6	1	16	63	24
ENSG00000143627	ENSG00000143627	PKLR	pyruvate kinase L/R [Source:HGNC Symbol;Acc:HGNC:9020]	protein_coding	7	279	6	35	1	140	17	111	20	221	33	260	65	94	26	52	0	576	5	160	21	66	46	330	11	427	9	83	23	666	19	55	1	231	19	12	8	366	4	1	2	5	28	32	26
ENSG00000197721	ENSG00000197721	CR1L	complement C3b/C4b receptor 1 like [Source:HGNC Symbol;Acc:HGNC:2335]	protein_coding	21	101	1	48	78	34	64	84	18	163	74	73	29	64	45	74	17	162	8	94	2	52	197	127	11	147	30	43	53	223	14	43	17	62	255	7	62	99	69	96	5	0	38	26	10
ENSG00000244703	ENSG00000244703	CD46P1	CD46 molecule pseudogene 1 [Source:HGNC Symbol;Acc:HGNC:6959]	unprocessed_pseudogene	13	32	0	15	21	14	31	20	7	88	36	5	12	33	11	20	6	48	6	36	6	7	85	50	6	64	11	14	37	73	12	5	2	12	48	1	22	28	20	53	0	0	0	6	9
ENSG00000285239	ENSG00000285239		novel transcript	lncRNA	0	14	0	3	58	12	0	2	2	15	0	0	0	0	19	0	5	8	0	9	12	3	13	13	3	9	0	13	0	9	0	0	1	2	83	0	17	0	4	9	5	0	0	7	3
ENSG00000234219	ENSG00000234219	CDCA4P4	cell division cycle associated 4 pseudogene 4 [Source:HGNC Symbol;Acc:HGNC:49773]	unprocessed_pseudogene	4	13	3	0	29	0	16	12	2	8	0	10	7	0	12	18	2	0	6	3	27	1	6	18	0	2	4	0	0	52	6	2	0	21	0	0	21	0	0	11	0	0	0	0	6
ENSG00000174059	ENSG00000174059	CD34	CD34 molecule [Source:HGNC Symbol;Acc:HGNC:1662]	protein_coding	453	133	236	100	1502	136	833	97	374	519	569	198	1281	72	960	266	395	167	229	56	2727	156	1864	145	122	137	574	77	5020	66	1083	38	363	471	2717	30	700	2	1811	211	1938	441	9	1504	359
ENSG00000285719	ENSG00000285719		novel transcript, antisense to CD34	lncRNA	1	5	3	5	35	36	0	5	10	3	0	4	1	1	6	2	2	6	1	32	3	17	8	4	14	2	7	19	3	27	14	0	11	6	9	8	8	0	1	20	0	0	0	17	3
ENSG00000284237	ENSG00000284237	LINC02767	long intergenic non-protein coding RNA 2767 [Source:HGNC Symbol;Acc:HGNC:54287]	lncRNA	3	12	0	3	29	0	10	1	18	34	5	5	3	2	69	56	26	6	3	16	63	8	44	14	14	3	35	17	107	2	14	0	17	3	3	9	41	8	97	0	587	1	11	82	38
ENSG00000199562	ENSG00000199562	RNU6-37P	RNA, U6 small nuclear 37, pseudogene [Source:HGNC Symbol;Acc:HGNC:34281]	snRNA	0	1	0	4	4	2	0	2	1	4	0	0	0	1	1	0	2	2	0	0	0	2	0	6	5	1	0	5	4	9	3	0	0	0	8	2	0	0	0	0	0	0	0	0	0
ENSG00000264501	ENSG00000264501	RN7SL731P	RNA, 7SL, cytoplasmic 731, pseudogene [Source:HGNC Symbol;Acc:HGNC:46747]	misc_RNA	11	27	3	14	22	30	14	10	24	52	0	24	35	19	6	21	10	33	9	5	20	57	19	2	17	37	21	57	15	18	14	8	2	38	21	7	24	8	17	8	0	0	0	0	1
ENSG00000284735	ENSG00000284735		novel transcript	lncRNA	5	24	4	13	17	15	6	14	20	37	0	6	2	5	24	1	5	14	7	14	20	59	10	10	13	12	11	33	11	31	7	8	4	8	47	218	18	7	15	3	0	1	6	15	26
ENSG00000284642	ENSG00000284642		novel transcript	lncRNA	1	16	1	23	2	4	0	1	6	20	0	3	0	4	11	0	0	21	2	10	2	21	5	5	7	2	2	15	2	3	0	1	1	27	5	14	49	10	40	0	1	0	60	15	20
ENSG00000142657	ENSG00000142657	PGD	phosphogluconate dehydrogenase [Source:HGNC Symbol;Acc:HGNC:8891]	protein_coding	10760	18565	1526	3064	8648	17055	11373	8182	5219	23896	6235	17849	7982	15218	1658	12160	3293	21983	1631	6747	3336	15223	9198	10623	1119	20168	13020	20357	8974	23815	4053	9146	2364	31242	3194	8748	9138	10180	3463	14217	7786	37508	7130	59	1076
ENSG00000271989	ENSG00000271989		novel transcript, antisense to APITD1-CORT	lncRNA	1	35	0	14	3	27	8	21	3	50	17	49	3	19	0	0	3	35	1	7	0	2	45	41	0	35	36	59	12	37	4	6	3	41	2	0	10	85	12	43	9	38	29	33	1
ENSG00000251503	ENSG00000251503	CENPS-CORT	CENPS-CORT readthrough [Source:HGNC Symbol;Acc:HGNC:38843]	protein_coding	56	207	12	47	139	134	111	121	61	247	128	265	146	103	75	124	11	193	44	36	195	185	300	181	32	215	153	234	302	247	72	30	77	207	137	3	146	289	142	183	560	91	0	36	145
ENSG00000175279	ENSG00000175279	CENPS	centromere protein S [Source:HGNC Symbol;Acc:HGNC:23163]	protein_coding	53	205	12	51	137	139	114	120	61	249	131	267	150	109	74	127	12	200	44	32	195	190	302	181	32	214	155	239	302	244	71	31	77	211	140	3	143	301	145	181	603	115	0	18	137
ENSG00000160049	ENSG00000160049	DFFA	DNA fragmentation factor subunit alpha [Source:HGNC Symbol;Acc:HGNC:2772]	protein_coding	216	805	88	133	481	362	290	437	162	414	185	931	352	551	153	276	99	497	75	261	401	584	431	475	69	505	294	373	614	603	174	243	156	933	41	366	439	494	373	831	1	288	30	28	185
ENSG00000203469	ENSG00000203469		novel transcript, antisense to DFFA	lncRNA	0	5	0	4	57	4	6	4	3	5	0	16	28	1	2	2	1	6	5	3	0	23	9	1	10	25	8	12	55	26	6	6	6	11	3	7	32	0	17	0	0	2	4	0	13
ENSG00000236035	ENSG00000236035	NSA2P1	NSA2 pseudogene 1 [Source:HGNC Symbol;Acc:HGNC:54580]	processed_pseudogene	0	14	0	3	0	21	0	1	11	23	0	0	0	1	8	0	7	18	0	13	0	4	0	2	0	1	0	17	0	52	0	0	0	0	70	0	1	1	0	0	0	0	0	8	8
ENSG00000221643	ENSG00000221643	SNORA77	small nucleolar RNA, H/ACA box 77 [Source:HGNC Symbol;Acc:HGNC:32663]	snoRNA	0	8	6	7	0	0	0	0	0	8	0	0	0	5	0	0	0	0	0	11	3	5	3	0	0	0	0	4	2	0	0	0	0	0	7	0	0	0	0	0	0	0	0	0	1
ENSG00000122188	ENSG00000122188	LAX1	lymphocyte transmembrane adaptor 1 [Source:HGNC Symbol;Acc:HGNC:26005]	protein_coding	8	46	29	54	96	80	28	32	45	65	0	1424	38	88	76	54	10	157	6	211	14	34	38	272	20	184	29	92	168	90	80	92	42	80	499	4	4	5	29	115	475	0	12	48	50
ENSG00000288644	ENSG00000288644		novel protein	protein_coding	26	62	22	29	118	65	53	48	51	57	53	171	59	74	26	60	33	50	23	50	59	94	68	52	9	87	27	63	90	138	51	31	19	44	23	0	24	1	57	4	31	0	0	0	1
ENSG00000227417	ENSG00000227417		SNF7 domain containing 2 (SNF7DC20) pseudogene	processed_pseudogene	0	1	0	0	0	0	2	11	2	15	0	3	0	0	2	3	0	0	0	2	1	0	3	6	0	2	0	3	2	0	5	0	0	0	63	0	2	0	18	18	0	0	2	1	0
ENSG00000182004	ENSG00000182004	SNRPE	small nuclear ribonucleoprotein polypeptide E [Source:HGNC Symbol;Acc:HGNC:11161]	protein_coding	385	920	133	258	600	512	700	435	244	763	374	1165	355	588	211	475	111	673	157	276	590	697	680	751	80	663	344	663	777	694	285	289	219	1283	451	525	587	1446	500	839	1128	2036	5758	1209	285
ENSG00000130768	ENSG00000130768	SMPDL3B	sphingomyelin phosphodiesterase acid like 3B [Source:HGNC Symbol;Acc:HGNC:21416]	protein_coding	21	12	0	13	19	60	47	18	0	27	0	90	22	0	3	7	1	56	0	22	36	38	27	13	0	78	39	75	25	131	51	5	7	25	23	34	3	1	25	178	1	2	77	26	28
ENSG00000227050	ENSG00000227050		novel transcript	lncRNA	40	8	13	2	104	16	110	13	16	9	26	63	29	10	11	23	5	12	17	9	31	6	38	23	1	34	28	24	65	98	35	11	20	37	1	29	61	18	50	98	81	44	0	6	55
ENSG00000240750	ENSG00000240750	RN7SL559P	RNA, 7SL, cytoplasmic 559, pseudogene [Source:HGNC Symbol;Acc:HGNC:46575]	misc_RNA	2	9	0	3	2	3	0	4	3	9	0	0	2	4	17	0	3	4	0	1	1	16	1	2	8	0	9	13	2	0	1	4	0	7	1	44	4	0	0	4	0	0	17	3	1
ENSG00000158156	ENSG00000158156	XKR8	XK related 8 [Source:HGNC Symbol;Acc:HGNC:25508]	protein_coding	538	150	136	21	902	321	1188	116	294	148	467	309	327	126	169	288	161	144	208	109	181	51	308	185	35	207	346	143	625	543	189	117	219	474	10	494	838	219	598	146	1051	516	15	70	494
ENSG00000182118	ENSG00000182118	FAM89A	family with sequence similarity 89 member A [Source:HGNC Symbol;Acc:HGNC:25057]	protein_coding	159	704	128	256	505	437	357	360	127	560	112	533	301	437	71	400	124	487	65	238	559	622	546	342	54	351	154	230	665	831	362	290	182	1083	555	178	382	651	302	840	1	800	71	0	173
ENSG00000283799	ENSG00000283799	MIR1182	microRNA 1182 [Source:HGNC Symbol;Acc:HGNC:35263]	miRNA	61	211	33	93	156	143	102	110	38	166	26	191	78	123	18	140	41	134	20	68	159	206	186	119	15	114	47	58	222	277	96	80	60	331	195	63	135	240	86	321	0	270	0	0	69
ENSG00000143633	ENSG00000143633	C1orf131	chromosome 1 open reading frame 131 [Source:HGNC Symbol;Acc:HGNC:25332]	protein_coding	93	275	25	107	182	241	147	145	100	418	119	368	193	205	76	141	35	257	53	226	202	345	238	179	41	271	156	258	191	361	91	82	36	336	191	357	98	663	130	231	0	945	2936	17	201
ENSG00000288208	ENSG00000288208		novel protein	protein_coding	178	205	37	109	357	274	235	125	110	193	139	509	133	287	16	231	69	287	44	189	204	140	267	154	29	226	214	199	252	306	143	239	61	311	168	16	154	653	305	167	906	182	1070	63	21
ENSG00000132773	ENSG00000132773	TOE1	target of EGR1, exonuclease [Source:HGNC Symbol;Acc:HGNC:15954]	protein_coding	157	419	85	82	294	231	183	114	57	264	151	404	103	111	33	131	90	251	40	140	234	345	222	146	14	264	143	258	120	493	138	113	47	310	286	11	24	545	86	330	131	12	0	16	10
ENSG00000070759	ENSG00000070759	TESK2	testis associated actin remodelling kinase 2 [Source:HGNC Symbol;Acc:HGNC:11732]	protein_coding	305	219	57	87	317	208	212	134	107	238	199	670	159	302	22	304	54	220	38	191	237	74	209	171	27	310	409	273	174	197	102	303	59	313	16	8	357	136	97	161	1	595	21	18	24
ENSG00000280670	ENSG00000280670	CCDC163	CCDC163 homolog [Source:HGNC Symbol;Acc:HGNC:27003]	protein_coding	2	55	5	20	5	39	51	3	2	38	59	61	9	30	24	1	8	16	5	21	16	5	19	76	10	10	20	60	64	87	21	12	1	24	5	26	20	4	14	2	1	0	26	7	10
ENSG00000132763	ENSG00000132763	MMACHC	metabolism of cobalamin associated C [Source:HGNC Symbol;Acc:HGNC:24525]	protein_coding	1306	4325	754	1261	2683	1998	2352	1818	720	2290	1275	4446	1936	2714	1127	1840	600	2879	677	1694	3397	3663	2973	2228	246	2664	1051	1427	4429	3035	1264	1272	1058	4864	849	1350	1490	2088	1748	2365	1884	2080	3591	1603	649
ENSG00000221953	ENSG00000221953	LINC02897	long intergenic non-protein coding RNA 2897 [Source:HGNC Symbol;Acc:HGNC:33759]	lncRNA	4	3	0	0	1	9	0	1	3	1	0	8	6	1	6	1	3	1	0	3	0	2	5	2	1	3	3	6	5	3	16	1	0	4	4	13	14	0	2	1	0	0	27	36	24
ENSG00000226164	ENSG00000226164	FGFR3P6	fibroblast growth factor receptor 3 pseudogene 6 [Source:HGNC Symbol;Acc:HGNC:37951]	processed_pseudogene	1	0	5	6	49	37	0	1	2	32	0	0	0	0	12	0	0	3	0	8	30	49	2	17	0	0	0	2	0	28	14	0	0	0	149	0	0	0	2	0	0	0	0	3	6
ENSG00000224014	ENSG00000224014		SMT3 suppressor of mif two 3 homolog 3 (yeast) (SUMO3) pseudogene	processed_pseudogene	0	0	0	12	0	7	0	1	6	1	0	0	0	0	9	0	0	35	2	7	0	19	0	0	0	0	0	4	0	0	0	4	0	0	0	0	0	0	0	0	0	0	84	0	0
ENSG00000215795	ENSG00000215795		peroxisomal biogenesis factor 5 (PEX5) pseudogene	processed_pseudogene	0	1	0	0	1	12	0	0	0	0	0	0	0	0	2	0	0	20	0	2	0	0	0	4	0	1	0	0	0	10	0	0	0	1	0	9	0	1	0	77	1	0	1	8	10
ENSG00000259865	ENSG00000259865		novel transcript	lncRNA	40	67	16	16	55	48	80	41	28	50	37	82	52	70	24	10	54	51	16	37	95	95	147	47	5	93	45	75	32	128	35	27	10	36	19	14	30	30	4	1	36	7	0	6	0
ENSG00000227671	ENSG00000227671	ZNF731P	zinc finger protein 731, pseudogene [Source:HGNC Symbol;Acc:HGNC:32471]	transcribed_unprocessed_pseudogene	68	145	9	30	113	69	174	84	34	118	43	96	61	91	28	97	19	192	33	48	97	64	79	8	2	128	56	50	199	131	47	21	9	85	0	7	37	41	67	0	0	0	0	11	4
ENSG00000283881	ENSG00000283881	MIR3916	microRNA 3916 [Source:HGNC Symbol;Acc:HGNC:38912]	miRNA	7	17	0	2	7	8	20	13	6	13	3	9	11	7	0	8	0	11	3	7	17	1	2	0	0	13	5	2	20	23	5	0	2	13	0	0	2	0	0	0	0	0	0	0	0
ENSG00000232347	ENSG00000232347		novel transcript	lncRNA	11	32	0	1	17	16	45	17	9	7	13	22	10	17	3	25	1	40	4	6	17	2	10	4	0	8	12	13	22	17	4	1	2	15	0	7	13	21	11	0	2	0	18	1	6
ENSG00000214144	ENSG00000214144		heat shock 70kDa protein 8 (HSPA8) pseudogene	processed_pseudogene	0	0	0	0	1	0	0	1	0	0	0	0	1	0	0	0	0	1	0	13	0	1	0	0	0	0	0	0	0	0	3	0	0	1	0	8	0	1	3	0	0	0	17	0	3
ENSG00000202079	ENSG00000202079	Y_RNA	Y RNA [Source:RFAM;Acc:RF00019]	misc_RNA	2	1	0	4	1	5	0	0	3	9	0	2	0	1	0	0	4	9	1	5	5	13	0	0	1	4	3	2	12	3	2	0	1	0	59	44	12	1	1	6	0	0	0	2	63
ENSG00000203664	ENSG00000203664	OR2W5P	olfactory receptor family 2 subfamily W member 5 pseudogene [Source:HGNC Symbol;Acc:HGNC:15424]	transcribed_unprocessed_pseudogene	0	6	1	3	1	12	0	0	0	3	0	0	1	0	1	2	2	0	0	4	0	23	0	0	0	14	1	0	1	0	0	0	0	0	2	1	4	5	7	3	2	0	0	5	10
ENSG00000169224	ENSG00000169224	GCSAML	germinal center associated signaling and motility like [Source:HGNC Symbol;Acc:HGNC:29583]	protein_coding	17	39	37	47	167	74	19	32	13	129	0	89	7	41	74	65	31	71	22	69	63	52	167	104	18	212	48	25	34	54	4	4	10	49	4	6	3	3	15	2	0	0	3	2	20
ENSG00000236817	ENSG00000236817		novel transcript	lncRNA	0	1	5	2	6	5	5	3	1	1	0	17	0	0	1	2	0	7	5	4	2	4	18	9	3	6	5	7	0	0	3	0	0	1	3	5	0	2	1	0	0	0	2	12	1
ENSG00000177476	ENSG00000177476	OR2G3	olfactory receptor family 2 subfamily G member 3 [Source:HGNC Symbol;Acc:HGNC:15008]	protein_coding	0	3	0	0	0	0	0	0	0	0	0	0	0	0	2	16	0	3	0	12	0	0	4	1	0	2	0	2	0	17	0	0	0	0	0	0	0	0	0	61	0	0	0	0	4
ENSG00000259776	ENSG00000259776		novel transcript	lncRNA	3	11	1	2	3	16	1	7	3	13	0	1	0	0	24	0	8	3	1	14	2	8	3	1	21	6	9	42	3	22	2	3	0	3	1	0	15	1	4	0	0	2	4	17	27
ENSG00000233355	ENSG00000233355	CHRM3-AS2	CHRM3 antisense RNA 2 [Source:HGNC Symbol;Acc:HGNC:43725]	lncRNA	9	38	20	19	18	57	46	20	57	254	28	69	4	33	43	13	10	14	29	88	227	18	136	23	47	59	29	29	21	11	4	2	4	80	4	2	43	12	66	36	1	0	23	36	26
ENSG00000217327	ENSG00000217327	RPS7P5	ribosomal protein S7 pseudogene 5 [Source:HGNC Symbol;Acc:HGNC:37037]	processed_pseudogene	0	3	1	1	10	17	0	0	2	21	0	9	0	2	0	0	1	2	1	4	0	4	11	1	3	5	5	5	0	1	2	5	3	0	0	7	16	0	0	0	0	0	0	0	3
ENSG00000228818	ENSG00000228818		proteasome 26S non-ATPase subunit 2 (PSMD2) pseudogene	processed_pseudogene	0	30	0	5	9	15	0	1	2	56	0	7	2	4	14	0	2	18	1	7	3	69	3	4	6	6	4	31	4	13	4	0	0	4	2	6	1	1	7	1	1	5	0	5	12
ENSG00000233735	ENSG00000233735		novel transcript	lncRNA	0	13	0	2	0	7	0	0	0	24	0	0	0	0	0	0	0	12	0	6	0	15	0	0	2	0	2	3	0	0	0	0	0	0	0	4	0	0	3	0	0	0	1	14	3
ENSG00000133019	ENSG00000133019	CHRM3	cholinergic receptor muscarinic 3 [Source:HGNC Symbol;Acc:HGNC:1952]	protein_coding	20	80	7	56	11	44	48	10	42	63	1	43	62	14	81	7	8	19	76	118	138	89	94	68	12	22	47	52	77	89	14	6	8	15	245	25	32	3	12	3	2	11	11	113	45
ENSG00000162636	ENSG00000162636	FAM102B	family with sequence similarity 102 member B [Source:HGNC Symbol;Acc:HGNC:27637]	protein_coding	276	617	86	108	790	410	608	362	238	703	238	1105	560	605	196	453	272	680	153	159	803	750	528	496	58	746	574	578	1031	899	175	82	128	701	200	7	714	36	449	321	1	36	94	57	61
ENSG00000162639	ENSG00000162639	HENMT1	HEN methyltransferase 1 [Source:HGNC Symbol;Acc:HGNC:26400]	protein_coding	252	514	81	178	295	375	378	221	204	511	294	1809	279	357	47	384	77	522	49	197	298	968	385	345	61	411	440	726	334	829	146	222	116	963	277	629	343	403	133	344	753	733	111	1468	185
ENSG00000285923	ENSG00000285923		Novel transcript	lncRNA	2	4	0	0	0	0	0	4	1	0	0	1	5	0	0	0	0	0	0	1	0	3	1	1	2	5	2	1	0	6	6	0	1	1	0	4	1	0	2	0	0	0	58	2	7
ENSG00000134186	ENSG00000134186	PRPF38B	pre-mRNA processing factor 38B [Source:HGNC Symbol;Acc:HGNC:25512]	protein_coding	264	488	81	276	590	472	577	264	283	577	317	1243	661	462	219	501	195	593	104	282	618	701	525	318	51	579	278	399	477	660	229	424	126	847	311	548	310	660	525	464	3	110	111	43	334
ENSG00000143107	ENSG00000143107	FNDC7	fibronectin type III domain containing 7 [Source:HGNC Symbol;Acc:HGNC:26668]	protein_coding	0	3	0	6	6	48	1	2	7	19	0	17	0	0	19	0	12	28	4	31	2	34	14	3	21	5	6	56	17	22	6	2	0	3	3	7	6	0	12	1	0	0	0	97	40
ENSG00000232971	ENSG00000232971		novel transcript, antisense to FNDC7	lncRNA	0	3	0	0	0	0	0	0	5	12	0	0	0	19	0	0	0	14	0	3	0	13	12	0	0	0	5	11	11	9	0	0	0	7	15	4	0	0	10	0	0	0	0	0	1
ENSG00000116266	ENSG00000116266	STXBP3	syntaxin binding protein 3 [Source:HGNC Symbol;Acc:HGNC:11446]	protein_coding	1162	1295	245	320	1114	827	1467	726	676	1464	832	2215	1146	970	844	777	217	1462	396	729	832	1205	1218	887	161	1462	677	1263	2019	1893	563	746	299	2227	307	992	954	1561	990	313	1800	516	10403	26	30
ENSG00000203897	ENSG00000203897	SPATA42	spermatogenesis associated 42 [Source:HGNC Symbol;Acc:HGNC:41198]	lncRNA	2	0	6	12	15	9	1	0	7	0	0	0	1	0	3	0	1	3	1	13	2	1	1	5	4	10	2	13	4	0	3	1	0	0	27	1	2	0	17	1	0	0	0	8	0
ENSG00000244716	ENSG00000244716		ribosomal protein L17 (RPL17) pseudogene	processed_pseudogene	9	11	1	1	18	13	13	13	4	7	11	42	5	11	2	13	3	20	2	9	10	14	18	12	2	24	3	14	10	21	6	7	3	19	4	3	0	7	2	1	2	3	0	3	4
ENSG00000228054	ENSG00000228054	RANP5	RAN pseudogene 5 [Source:HGNC Symbol;Acc:HGNC:39860]	processed_pseudogene	0	9	2	1	30	20	0	5	1	34	0	0	0	0	21	0	1	2	2	15	1	4	0	18	13	12	5	17	7	0	1	1	3	20	6	4	28	0	58	9	0	0	0	19	1
ENSG00000273382	ENSG00000273382	TMEM167B-DT	TMEM167B divergent transcript [Source:HGNC Symbol;Acc:HGNC:55076]	lncRNA	165	129	32	55	135	127	255	40	63	160	100	179	102	124	60	122	51	133	28	45	134	106	153	60	28	134	127	96	201	169	69	67	49	248	48	30	66	117	52	82	146	170	975	9	40
ENSG00000215717	ENSG00000215717	TMEM167B	transmembrane protein 167B [Source:HGNC Symbol;Acc:HGNC:30187]	protein_coding	917	952	331	288	1396	738	1828	544	513	906	773	1615	873	1006	485	947	440	1012	293	473	1259	969	1607	669	120	1105	616	762	1691	1398	567	567	412	1628	251	396	686	666	566	773	1369	1051	4631	18	535
ENSG00000251484	ENSG00000251484		poly(rC) binding protein 1 (PCBP1) pseudogene	processed_pseudogene	0	0	0	0	5	16	0	0	2	0	0	0	0	0	4	0	2	18	0	9	0	29	0	19	1	7	0	8	1	0	3	0	2	0	0	0	0	0	0	36	1	1	12	1	3
ENSG00000132676	ENSG00000132676	DAP3	death associated protein 3 [Source:HGNC Symbol;Acc:HGNC:2673]	protein_coding	1090	1864	341	548	2029	1254	1209	997	514	1748	833	3167	1288	1348	564	1367	426	1907	395	861	1632	1780	1560	1612	153	1675	994	1081	1901	1742	815	750	516	2705	770	971	1310	1649	1000	1653	620	1448	5559	101	221
ENSG00000203761	ENSG00000203761	MSTO2P	misato family member 2, pseudogene [Source:HGNC Symbol;Acc:HGNC:26329]	unprocessed_pseudogene	2	19	1	0	5	10	24	14	9	5	2	31	7	15	0	3	16	6	6	31	13	17	12	21	2	3	22	13	56	27	16	11	0	28	3	3	13	0	1	12	0	1	0	8	15
ENSG00000234937	ENSG00000234937		proteasome (prosome, macropain) 26S subunit, non-ATPase, 7 (Mov34 homolog) (PSMD7) pseudogene	processed_pseudogene	3	28	1	11	0	7	0	2	4	6	0	0	0	2	4	0	1	5	0	3	9	2	2	10	15	8	3	4	0	3	10	4	1	2	0	4	0	0	2	0	0	0	9	3	11
ENSG00000132718	ENSG00000132718	SYT11	synaptotagmin 11 [Source:HGNC Symbol;Acc:HGNC:19239]	protein_coding	51	73	6	34	79	42	26	44	13	97	145	221	76	67	106	69	51	4	22	54	37	32	46	69	42	105	84	71	92	119	36	56	6	107	93	5	121	1	3	0	0	1	45	5	35
ENSG00000143622	ENSG00000143622	RIT1	Ras like without CAAX 1 [Source:HGNC Symbol;Acc:HGNC:10023]	protein_coding	1521	1432	391	399	1130	773	2172	878	789	1733	662	1372	857	1031	372	1001	433	1638	318	715	784	1495	1378	987	160	1662	842	882	1350	1264	887	822	346	2320	245	832	1457	1271	563	1216	1561	1860	2758	10	470
ENSG00000132680	ENSG00000132680	KHDC4	KH domain containing 4, pre-mRNA splicing factor [Source:HGNC Symbol;Acc:HGNC:29145]	protein_coding	26	154	22	47	82	60	41	86	32	194	19	179	110	85	41	44	21	176	14	88	76	146	78	79	18	110	39	130	89	45	34	37	2	85	167	219	17	155	100	73	140	9	9	49	28
ENSG00000273002	ENSG00000273002	ARHGEF2-AS2	ARHGEF2 antisense RNA 2 [Source:HGNC Symbol;Acc:HGNC:55175]	lncRNA	3	5	0	3	3	13	0	8	6	11	0	4	0	2	5	6	3	13	0	17	2	44	9	20	1	17	1	10	6	3	1	6	2	18	64	7	5	1	1	1	0	0	1	15	12
ENSG00000224276	ENSG00000224276	ARHGEF2-AS1	ARHGEF2 antisense RNA 1 [Source:HGNC Symbol;Acc:HGNC:40082]	lncRNA	0	0	0	0	0	0	0	0	0	5	0	0	0	0	0	0	3	7	0	1	0	10	3	0	8	10	0	10	0	5	0	0	0	0	58	7	0	0	0	0	0	0	4	0	0
ENSG00000285677	ENSG00000285677		Novel transcript, antisense to SSR2	lncRNA	329	347	109	143	763	202	707	158	177	369	395	1238	545	491	249	286	161	401	159	194	500	385	484	334	82	425	311	325	975	469	243	167	198	753	438	267	467	256	441	555	305	534	92	890	296
ENSG00000163479	ENSG00000163479	SSR2	signal sequence receptor subunit 2 [Source:HGNC Symbol;Acc:HGNC:11324]	protein_coding	829	778	282	278	1748	556	1563	354	387	868	940	2980	1184	1088	555	640	409	881	331	426	1215	719	1115	757	158	1047	676	713	2067	1044	511	402	424	1690	1114	1119	1258	826	1057	1516	777	1331	24	2726	733
ENSG00000160803	ENSG00000160803	UBQLN4	ubiquilin 4 [Source:HGNC Symbol;Acc:HGNC:1237]	protein_coding	44	267	37	72	183	206	151	94	31	313	60	246	208	133	84	94	37	276	42	75	202	177	246	146	29	285	82	84	236	221	102	99	61	151	30	3	48	99	191	146	505	448	69	55	40
ENSG00000132698	ENSG00000132698	RAB25	RAB25, member RAS oncogene family [Source:HGNC Symbol;Acc:HGNC:18238]	protein_coding	0	6	0	2	36	12	0	4	2	5	0	3	0	7	1	0	0	6	0	8	0	15	0	0	0	19	0	14	2	5	9	1	0	8	12	5	2	1	6	0	0	0	25	12	8
ENSG00000260238	ENSG00000260238	PMF1-BGLAP	PMF1-BGLAP readthrough [Source:HGNC Symbol;Acc:HGNC:42953]	protein_coding	444	745	144	130	606	440	759	287	171	729	271	1075	451	528	180	371	132	644	141	304	663	701	720	518	37	610	361	633	737	916	277	333	216	1491	208	883	641	1124	294	1208	1589	1423	0	879	507
ENSG00000242252	ENSG00000242252	BGLAP	bone gamma-carboxyglutamate protein [Source:HGNC Symbol;Acc:HGNC:1043]	protein_coding	16	25	16	2	46	6	19	33	20	21	3	15	36	31	22	14	9	10	6	11	29	46	64	12	11	15	13	15	77	29	21	21	13	23	25	10	18	46	21	18	178	0	10	4	62
ENSG00000198952	ENSG00000198952	SMG5	SMG5 nonsense mediated mRNA decay factor [Source:HGNC Symbol;Acc:HGNC:24644]	protein_coding	529	1196	54	194	708	606	663	559	159	623	501	1723	545	517	266	870	200	1005	229	389	588	799	1093	837	80	789	592	1126	1017	1222	381	364	149	1842	729	13	424	4	717	296	21	19	48	105	53
ENSG00000163472	ENSG00000163472	TMEM79	transmembrane protein 79 [Source:HGNC Symbol;Acc:HGNC:28196]	protein_coding	115	93	13	21	147	32	130	71	35	85	44	216	106	122	49	100	34	64	39	32	130	92	108	65	4	89	146	186	175	153	99	14	29	86	9	283	16	81	137	147	4	580	123	2	11
ENSG00000163468	ENSG00000163468	CCT3	chaperonin containing TCP1 subunit 3 [Source:HGNC Symbol;Acc:HGNC:1616]	protein_coding	1069	4559	607	1254	3116	3178	1785	2264	901	3422	1713	4790	2169	3003	1255	2672	705	4679	433	1854	2937	3294	2872	3300	356	4051	1402	2120	2776	4963	1135	1666	858	5184	765	3729	1774	4252	1427	4043	1092	4167	11259	38	1136
ENSG00000132677	ENSG00000132677	RHBG	Rh family B glycoprotein [Source:HGNC Symbol;Acc:HGNC:14572]	protein_coding	2	28	1	15	13	35	5	11	3	6	0	12	0	5	5	3	3	26	2	12	15	89	5	19	6	15	4	10	7	52	16	2	0	7	42	11	21	21	11	11	9	2	60	36	49
ENSG00000237390	ENSG00000237390		novel transcript	lncRNA	2	35	0	3	15	27	5	15	6	6	0	4	0	3	9	3	2	32	5	14	4	38	3	1	8	5	1	20	4	30	10	1	1	14	152	19	6	12	28	5	2	3	10	17	30
ENSG00000254726	ENSG00000254726	MEX3A	mex-3 RNA binding family member A [Source:HGNC Symbol;Acc:HGNC:33482]	protein_coding	0	5	1	0	1	6	1	8	1	10	0	0	1	7	19	2	1	2	1	3	5	6	1	3	0	1	4	5	6	1	8	1	1	0	8	10	9	17	5	0	11	3	46	42	31
ENSG00000186377	ENSG00000186377	CYP4X1	cytochrome P450 family 4 subfamily X member 1 [Source:HGNC Symbol;Acc:HGNC:20244]	protein_coding	0	7	0	3	127	10	1	2	10	18	28	0	25	0	24	0	32	2	0	11	0	0	18	11	5	5	12	11	37	0	11	1	8	3	20	4	91	0	44	0	14	0	0	31	239
ENSG00000186160	ENSG00000186160	CYP4Z1	cytochrome P450 family 4 subfamily Z member 1 [Source:HGNC Symbol;Acc:HGNC:20583]	protein_coding	0	18	5	22	14	8	0	13	3	2	1	1	0	0	8	0	1	15	2	12	7	19	1	1	6	3	1	18	18	5	7	2	1	0	0	3	0	6	4	0	0	0	0	7	9
ENSG00000225154	ENSG00000225154	TUBAP9	tubulin alpha pseudogene 9 [Source:HGNC Symbol;Acc:HGNC:54876]	processed_pseudogene	0	0	0	8	0	1	0	0	0	1	0	0	0	1	0	0	0	0	0	1	1	0	0	1	0	4	0	0	0	0	1	0	0	0	2	0	0	0	6	0	0	0	0	0	2
ENSG00000225506	ENSG00000225506	CYP4A22-AS1	CYP4A22 antisense RNA 1 [Source:HGNC Symbol;Acc:HGNC:43715]	lncRNA	1	1	3	12	21	2	1	7	8	21	0	9	0	0	1	13	21	16	2	6	2	4	7	20	3	1	8	14	32	5	2	3	1	2	26	2	1	2	4	0	0	0	6	9	7
ENSG00000225514	ENSG00000225514	MTND1P34	MT-ND1 pseudogene 34 [Source:HGNC Symbol;Acc:HGNC:42090]	transcribed_processed_pseudogene	0	3	0	4	0	0	4	7	1	22	0	0	0	1	2	5	3	13	0	3	5	0	3	0	0	5	1	0	3	6	0	0	0	2	4	121	0	0	0	2	0	0	0	11	0
ENSG00000224805	ENSG00000224805	LINC00853	long intergenic non-protein coding RNA 853 [Source:HGNC Symbol;Acc:HGNC:43716]	lncRNA	8	3	5	8	55	18	18	20	6	15	0	8	25	15	10	16	1	12	24	15	12	14	20	19	13	35	7	6	47	39	26	5	9	18	2	71	27	2	106	7	110	101	32	638	43
ENSG00000162366	ENSG00000162366	PDZK1IP1	PDZK1 interacting protein 1 [Source:HGNC Symbol;Acc:HGNC:16887]	protein_coding	83	130	95	89	241	103	23	33	68	215	123	223	89	122	118	450	71	266	173	205	167	96	400	282	84	364	67	124	322	343	20	22	129	343	218	356	182	553	577	356	717	684	1649	515	767
ENSG00000226252	ENSG00000226252		novel transcript	lncRNA	12	12	18	29	47	26	33	25	20	65	8	44	6	17	5	54	11	45	25	18	65	48	46	51	18	73	8	14	90	79	14	10	21	20	73	118	42	69	232	55	67	60	18	56	242
ENSG00000225762	ENSG00000225762	LINC01389	long intergenic non-protein coding RNA 1389 [Source:HGNC Symbol;Acc:HGNC:50661]	lncRNA	0	10	0	2	1	6	5	3	5	29	0	3	9	1	9	0	1	12	4	13	0	51	0	6	9	12	0	3	4	1	5	10	0	4	43	80	1	0	2	0	3	0	27	0	2
ENSG00000186790	ENSG00000186790	FOXE3	forkhead box E3 [Source:HGNC Symbol;Acc:HGNC:3808]	protein_coding	0	0	0	0	1	0	0	0	0	7	0	0	0	0	4	0	0	0	0	2	0	3	4	0	0	0	0	0	0	0	3	0	0	2	5	8	3	3	3	0	7	0	1	22	21
ENSG00000237424	ENSG00000237424	FOXD2-AS1	FOXD2 adjacent opposite strand RNA 1 [Source:HGNC Symbol;Acc:HGNC:44256]	lncRNA	1	1	5	0	3	0	0	2	2	2	0	7	0	2	0	2	2	32	0	8	0	0	3	15	1	15	9	15	0	67	7	0	2	17	0	5	7	74	3	1	0	0	28	8	6
ENSG00000189030	ENSG00000189030	VHLL	VHL like [Source:HGNC Symbol;Acc:HGNC:30666]	protein_coding	0	2	0	1	22	9	0	4	0	0	0	0	0	0	2	0	1	0	0	1	3	31	0	0	4	2	2	7	0	12	0	0	0	0	2	61	0	0	0	0	0	0	43	0	4
ENSG00000143061	ENSG00000143061	IGSF3	immunoglobulin superfamily member 3 [Source:HGNC Symbol;Acc:HGNC:5950]	protein_coding	0	16	0	7	23	1	0	5	33	6	0	2	13	2	0	2	1	23	0	35	15	148	28	28	2	13	6	29	0	47	25	4	1	2	75	23	0	4	94	20	7	10	38	69	105
ENSG00000135821	ENSG00000135821	GLUL	glutamate-ammonia ligase [Source:HGNC Symbol;Acc:HGNC:4341]	protein_coding	34355	32408	13249	10263	75287	21598	74023	15493	15612	28908	22752	48851	60967	45305	22386	27061	17617	29851	10536	16105	58991	47562	55907	27184	3899	34383	19352	16332	99494	43478	21102	14541	15191	54991	67443	80131	47672	34618	60735	174149	89973	81336	123004	35009	34136
ENSG00000203740	ENSG00000203740	NTMT2	N-terminal Xaa-Pro-Lys N-methyltransferase 2 [Source:HGNC Symbol;Acc:HGNC:31932]	protein_coding	0	11	0	11	8	33	2	2	2	1	0	0	0	0	18	0	5	14	0	54	9	100	5	0	13	28	23	10	8	43	1	4	0	1	44	15	0	2	3	37	0	0	12	28	10
ENSG00000162374	ENSG00000162374	ELAVL4	ELAV like RNA binding protein 4 [Source:HGNC Symbol;Acc:HGNC:3315]	protein_coding	0	33	1	15	6	7	5	3	3	30	0	0	0	5	9	2	7	20	1	32	1	68	27	49	4	32	6	18	0	53	7	1	0	5	132	10	17	6	20	3	7	4	29	5	32
ENSG00000168275	ENSG00000168275	COA6	cytochrome c oxidase assembly factor 6 [Source:HGNC Symbol;Acc:HGNC:18025]	protein_coding	195	440	70	131	143	257	387	218	70	336	159	533	133	300	73	234	43	372	40	177	298	307	262	207	21	223	128	310	298	374	110	153	51	512	102	498	303	401	110	274	246	533	1554	6	118
ENSG00000241563	ENSG00000241563	CORT	cortistatin [Source:HGNC Symbol;Acc:HGNC:2257]	protein_coding	4	26	0	2	17	0	2	12	1	24	0	18	2	0	1	0	3	10	0	5	5	19	17	18	0	16	10	10	2	28	5	5	4	32	2	1	17	28	0	17	2	0	0	0	6
ENSG00000153207	ENSG00000153207	AHCTF1	AT-hook containing transcription factor 1 [Source:HGNC Symbol;Acc:HGNC:24618]	protein_coding	566	1078	74	223	826	838	610	342	491	849	450	1431	921	445	225	765	237	965	277	448	324	916	1138	755	56	617	425	588	1105	1384	258	399	204	666	747	1195	206	281	670	351	1	1107	39	93	125
ENSG00000156869	ENSG00000156869	FRRS1	ferric chelate reductase 1 [Source:HGNC Symbol;Acc:HGNC:27622]	protein_coding	4	87	7	27	43	38	5	6	16	14	13	17	87	3	37	25	10	26	20	44	37	131	53	27	23	54	20	93	119	6	19	7	4	6	25	25	51	5	41	7	157	0	14	85	29
ENSG00000033122	ENSG00000033122	LRRC7	leucine rich repeat containing 7 [Source:HGNC Symbol;Acc:HGNC:18531]	protein_coding	5	68	5	68	67	97	25	24	42	147	0	54	21	5	89	20	26	98	10	219	66	303	50	11	68	80	47	100	51	55	40	42	15	30	44	18	13	12	83	16	3	5	91	90	72
ENSG00000143278	ENSG00000143278	F13B	coagulation factor XIII B chain [Source:HGNC Symbol;Acc:HGNC:3534]	protein_coding	0	8	0	0	0	2	1	0	0	8	0	0	1	14	5	0	0	0	0	3	0	2	1	1	1	1	0	10	0	1	0	0	0	1	1	0	1	2	1	0	0	0	0	0	10
ENSG00000116678	ENSG00000116678	LEPR	leptin receptor [Source:HGNC Symbol;Acc:HGNC:6554]	protein_coding	305	372	214	79	1288	530	567	306	270	542	547	559	860	489	248	587	352	392	253	266	501	433	1348	532	191	868	207	221	1294	928	451	172	143	445	373	136	268	424	927	231	135	106	8	26	420
ENSG00000159352	ENSG00000159352	PSMD4	proteasome 26S subunit ubiquitin receptor, non-ATPase 4 [Source:HGNC Symbol;Acc:HGNC:9561]	protein_coding	3349	4333	837	1143	4045	2920	4667	2252	1388	3598	2386	6375	3056	2860	1526	2504	1220	4171	888	1599	4198	4195	4726	2774	358	3589	2380	2913	5247	4760	1955	2014	1285	8182	2955	4023	3311	4442	2794	5105	5628	10110	34861	2352	2018
ENSG00000158710	ENSG00000158710	TAGLN2	transgelin 2 [Source:HGNC Symbol;Acc:HGNC:11554]	protein_coding	17383	18313	4687	6230	22487	14457	14108	9653	6943	22686	6702	16997	13564	12498	6250	26439	5757	14692	5302	7616	12441	14089	19703	20063	3609	28918	10814	16719	24517	25254	7057	7826	7624	38522	9489	21567	27138	19130	34667	19040	8615	20014	656	4741	7177
ENSG00000162734	ENSG00000162734	PEA15	proliferation and apoptosis adaptor protein 15 [Source:HGNC Symbol;Acc:HGNC:8822]	protein_coding	408	729	193	207	998	383	600	556	213	540	379	590	710	573	540	600	250	569	189	186	1145	847	1136	434	88	419	307	209	1280	407	417	273	247	783	612	353	563	694	828	1169	1447	521	558	35	364
ENSG00000049239	ENSG00000049239	H6PD	hexose-6-phosphate dehydrogenase/glucose 1-dehydrogenase [Source:HGNC Symbol;Acc:HGNC:4795]	protein_coding	60	52	29	15	57	91	62	58	20	12	101	242	204	71	202	30	67	96	14	35	81	60	137	63	29	119	19	70	524	103	138	29	5	195	252	23	327	11	284	112	5	0	25	103	60
ENSG00000186564	ENSG00000186564	FOXD2	forkhead box D2 [Source:HGNC Symbol;Acc:HGNC:3803]	protein_coding	6	4	3	1	0	32	1	2	1	10	0	0	0	0	13	7	7	2	1	8	2	1	0	2	3	5	3	4	20	12	3	1	0	0	26	8	5	3	4	3	5	2	30	49	26
ENSG00000244038	ENSG00000244038	DDOST	dolichyl-diphosphooligosaccharide--protein glycosyltransferase non-catalytic subunit [Source:HGNC Symbol;Acc:HGNC:2728]	protein_coding	426	916	138	201	1345	449	918	312	342	1035	662	1918	1245	1260	497	631	277	754	157	341	1145	632	1186	498	122	801	782	684	1888	715	489	277	373	1114	742	502	609	713	1016	842	644	616	68	68	330
ENSG00000158747	ENSG00000158747	NBL1	NBL1, DAN family BMP antagonist [Source:HGNC Symbol;Acc:HGNC:7650]	protein_coding	362	499	134	147	925	293	677	248	149	432	255	656	606	328	352	290	191	392	117	137	763	522	740	387	46	344	284	289	1436	359	342	181	222	889	959	528	865	897	936	905	1286	887	3179	1014	538
ENSG00000116690	ENSG00000116690	PRG4	proteoglycan 4 [Source:HGNC Symbol;Acc:HGNC:9364]	protein_coding	26	72	18	75	57	32	65	29	28	59	114	85	94	42	36	21	49	56	28	47	151	51	253	31	28	35	68	54	151	139	60	28	24	14	136	43	17	56	99	22	142	0	0	7	40
ENSG00000126091	ENSG00000126091	ST3GAL3	ST3 beta-galactoside alpha-2,3-sialyltransferase 3 [Source:HGNC Symbol;Acc:HGNC:10866]	protein_coding	212	429	112	225	797	514	282	210	172	828	128	354	374	302	389	479	230	463	144	254	490	540	724	718	162	700	297	370	691	479	195	162	138	923	1117	45	309	341	923	259	12	438	159	175	126
ENSG00000162383	ENSG00000162383	SLC1A7	solute carrier family 1 member 7 [Source:HGNC Symbol;Acc:HGNC:10945]	protein_coding	21	1	9	1	125	6	65	0	15	10	23	0	54	0	25	0	9	4	7	3	91	14	107	3	3	2	10	2	279	4	30	3	21	3	11	14	78	4	129	14	4	2	1	75	34
ENSG00000171163	ENSG00000171163	ZNF692	zinc finger protein 692 [Source:HGNC Symbol;Acc:HGNC:26049]	protein_coding	40	84	31	17	106	81	172	66	62	108	31	97	40	59	1	133	41	167	5	61	89	59	102	110	16	117	43	87	59	113	89	39	16	183	8	7	31	1	75	256	7	503	23	37	30
ENSG00000172456	ENSG00000172456	FGGY	FGGY carbohydrate kinase domain containing [Source:HGNC Symbol;Acc:HGNC:25610]	protein_coding	27	56	39	18	233	66	252	26	74	177	5	153	65	59	48	37	24	86	13	126	268	242	146	31	14	96	68	128	270	108	55	50	69	122	79	12	164	0	77	34	13	9	23	59	49
ENSG00000162946	ENSG00000162946	DISC1	DISC1 scaffold protein [Source:HGNC Symbol;Acc:HGNC:2888]	protein_coding	93	60	24	71	383	235	115	162	54	110	208	314	91	134	34	130	39	110	84	220	216	47	16	129	5	325	111	89	389	233	126	129	83	309	257	38	113	28	183	336	2	2	167	92	59
ENSG00000158786	ENSG00000158786	PLA2G2F	phospholipase A2 group IIF [Source:HGNC Symbol;Acc:HGNC:30040]	protein_coding	1	2	0	6	2	1	6	1	0	2	0	4	0	0	2	1	1	5	0	1	6	23	0	6	0	0	0	0	0	5	5	0	0	1	9	11	13	5	6	3	5	0	187	69	42
ENSG00000118733	ENSG00000118733	OLFM3	olfactomedin 3 [Source:HGNC Symbol;Acc:HGNC:17990]	protein_coding	0	16	0	7	2	0	4	3	3	6	0	2	2	0	5	3	0	15	2	15	49	22	6	0	5	4	0	4	0	8	0	0	0	0	39	6	0	0	5	0	5	0	0	15	7
ENSG00000157870	ENSG00000157870	PRXL2B	peroxiredoxin like 2B [Source:HGNC Symbol;Acc:HGNC:28390]	protein_coding	94	408	40	59	243	255	316	132	70	258	121	400	145	209	75	250	72	313	30	89	281	111	169	287	28	283	246	224	309	272	127	99	89	373	6	14	128	7	170	373	0	1693	51	26	123
ENSG00000179085	ENSG00000179085	DPM3	dolichyl-phosphate mannosyltransferase subunit 3, regulatory [Source:HGNC Symbol;Acc:HGNC:3007]	protein_coding	24	31	10	18	51	15	43	3	12	46	17	80	26	32	14	22	4	25	13	7	32	40	54	28	3	41	24	26	42	30	21	10	12	49	43	59	77	68	103	96	135	221	61	1	89
ENSG00000173080	ENSG00000173080	RXFP4	relaxin family peptide/INSL5 receptor 4 [Source:HGNC Symbol;Acc:HGNC:14666]	protein_coding	0	0	0	1	6	14	0	0	0	18	0	2	0	1	0	0	0	0	0	11	2	3	0	7	0	3	0	0	0	0	1	0	0	1	2	1	12	4	6	0	0	0	2	6	27
ENSG00000183347	ENSG00000183347	GBP6	guanylate binding protein family member 6 [Source:HGNC Symbol;Acc:HGNC:25395]	protein_coding	17	24	32	17	83	25	13	12	6	23	26	0	26	0	25	0	4	10	18	132	1	62	10	7	14	2	28	72	12	63	4	0	3	3	6	7	2	0	4	8	0	0	18	40	11
ENSG00000276470	ENSG00000276470			misc_RNA	0	1	1	3	14	1	8	0	3	18	12	0	6	0	0	8	0	4	2	0	0	8	2	4	0	17	0	4	18	9	0	2	0	16	0	52	22	2	0	0	152	1	4	0	58
ENSG00000278852	ENSG00000278852			misc_RNA	0	0	5	2	12	5	12	0	5	19	9	0	15	0	0	1	0	6	1	0	0	13	1	7	0	8	0	3	29	8	0	0	0	17	1	44	16	0	0	0	142	0	0	0	53
ENSG00000275915	ENSG00000275915			misc_RNA	7	2	0	4	20	6	0	0	6	16	7	0	2	0	4	7	0	1	0	2	0	20	7	9	0	5	0	11	6	7	0	0	0	20	7	42	1	0	11	0	0	0	0	0	46
ENSG00000120937	ENSG00000120937	NPPB	natriuretic peptide B [Source:HGNC Symbol;Acc:HGNC:7940]	protein_coding	0	0	0	0	0	0	1	1	0	3	0	12	2	0	11	0	2	0	0	0	5	8	0	1	0	0	0	0	0	0	2	0	0	0	0	4	38	0	0	0	1	0	23	22	48
ENSG00000224904	ENSG00000224904	SBF1P2	SBF1 pseudogene 2 [Source:HGNC Symbol;Acc:HGNC:54552]	processed_pseudogene	1	10	0	0	5	15	0	0	1	50	0	0	0	7	2	3	13	18	0	6	0	8	5	4	0	0	5	8	5	36	9	10	0	0	123	6	5	2	7	7	6	0	2	93	14
ENSG00000285646	ENSG00000285646		novel transcript	lncRNA	3	41	0	12	37	19	0	5	2	16	0	4	17	16	28	5	0	31	4	19	19	19	8	22	7	84	12	10	48	1	1	4	7	17	2	8	16	10	9	1	0	29	3	7	12
ENSG00000116685	ENSG00000116685	KIAA2013	KIAA2013 [Source:HGNC Symbol;Acc:HGNC:28513]	protein_coding	938	644	90	123	827	596	1101	228	346	485	422	1020	764	452	385	751	346	587	240	202	664	538	791	555	142	460	408	654	1127	921	241	205	277	864	441	1025	865	587	968	916	2	0	102	26	614
ENSG00000083444	ENSG00000083444	PLOD1	procollagen-lysine,2-oxoglutarate 5-dioxygenase 1 [Source:HGNC Symbol;Acc:HGNC:9081]	protein_coding	334	204	50	77	142	208	474	184	111	89	249	599	495	311	142	389	141	85	43	63	670	482	361	165	57	170	176	93	789	264	168	30	225	108	877	713	259	9	246	178	3	1	205	84	43
ENSG00000270914	ENSG00000270914		inositol(myo)-1(or 4)-monophosphatase 1 (IMPA1) pseudogene	processed_pseudogene	1	4	0	0	3	5	0	1	1	4	0	0	0	0	10	0	2	0	3	2	0	0	0	1	2	0	1	1	4	1	3	0	1	1	20	2	11	0	5	0	0	0	0	9	0
ENSG00000116691	ENSG00000116691	MIIP	migration and invasion inhibitory protein [Source:HGNC Symbol;Acc:HGNC:25715]	protein_coding	740	797	100	218	657	680	675	374	244	800	367	683	508	579	238	544	226	608	100	231	298	478	658	684	73	669	725	958	738	949	267	304	223	1322	591	1673	843	1450	215	949	2	1346	2746	53	18
ENSG00000243539	ENSG00000243539	RN7SL649P	RNA, 7SL, cytoplasmic 649, pseudogene [Source:HGNC Symbol;Acc:HGNC:46665]	misc_RNA	2	8	0	4	3	6	0	13	5	7	0	0	0	0	2	3	1	0	1	1	4	3	2	8	2	3	7	5	19	0	5	5	0	1	63	0	1	3	0	0	2	0	0	0	3
ENSG00000120949	ENSG00000120949	TNFRSF8	TNF receptor superfamily member 8 [Source:HGNC Symbol;Acc:HGNC:11923]	protein_coding	161	186	70	101	147	84	243	54	79	154	76	78	92	16	78	49	38	148	39	88	153	246	34	118	16	131	27	67	193	173	152	63	51	174	3	14	107	1	130	229	39	3	27	73	537
ENSG00000227875	ENSG00000227875	RPL23AP89	ribosomal protein L23a pseudogene 89 [Source:HGNC Symbol;Acc:HGNC:51623]	processed_pseudogene	0	0	0	4	19	16	5	1	0	11	1	0	0	9	2	0	3	0	1	9	9	25	0	1	5	2	0	2	11	3	0	0	0	0	21	0	0	0	20	0	0	0	0	18	4
ENSG00000285604	ENSG00000285604		novel transcript, antisense to TNFRSF8	lncRNA	0	0	0	0	0	2	0	0	0	0	0	1	0	1	0	3	0	0	0	0	0	22	6	0	0	1	0	7	0	4	1	0	0	0	1	4	3	4	12	0	0	4	84	21	14
ENSG00000283789	ENSG00000283789	MIR7846	microRNA 7846 [Source:HGNC Symbol;Acc:HGNC:50029]	miRNA	19	13	3	10	27	11	66	9	9	4	24	86	8	18	13	13	6	14	3	9	14	23	19	10	3	19	12	7	42	40	12	13	3	24	5	0	34	0	9	20	0	0	0	25	26
ENSG00000162521	ENSG00000162521	RBBP4	RB binding protein 4, chromatin remodeling factor [Source:HGNC Symbol;Acc:HGNC:9887]	protein_coding	2362	5256	735	1239	4081	3347	3253	2901	1674	5398	2451	9832	3682	5042	1519	3039	1189	5507	1019	2579	5189	4729	4362	4869	568	6065	3680	4874	6466	8339	2126	1829	1169	6822	2255	3427	2348	4438	3244	4375	2958	5048	7400	2665	848
ENSG00000162520	ENSG00000162520	SYNC	syncoilin, intermediate filament protein [Source:HGNC Symbol;Acc:HGNC:28897]	protein_coding	1091	2035	332	483	1832	1314	1427	1121	715	2066	1275	3892	1657	1952	743	1105	468	2113	478	1055	2702	1920	1917	1804	251	2440	1312	1889	3318	3024	1093	652	508	2675	965	988	1018	1644	1405	631	952	1124	2240	630	395
ENSG00000224409	ENSG00000224409		novel transcript	lncRNA	1	14	1	10	20	2	0	0	2	15	0	0	0	5	15	1	9	4	6	8	8	16	19	6	2	16	6	17	10	0	4	0	0	6	33	1	1	0	38	0	0	0	0	0	10
ENSG00000162522	ENSG00000162522	KIAA1522	KIAA1522 [Source:HGNC Symbol;Acc:HGNC:29301]	protein_coding	16	52	13	11	37	16	7	14	8	32	22	8	20	21	27	3	2	31	9	12	141	34	16	23	3	25	3	9	82	17	20	11	15	13	12	13	6	103	26	16	6	2	120	54	59
ENSG00000116497	ENSG00000116497	S100PBP	S100P binding protein [Source:HGNC Symbol;Acc:HGNC:25768]	protein_coding	114	246	71	98	269	144	235	107	150	323	121	455	201	386	159	138	97	215	58	240	397	245	271	225	121	295	114	437	263	334	82	64	123	199	67	80	140	6	292	92	5	1264	15	68	40
ENSG00000160097	ENSG00000160097	FNDC5	fibronectin type III domain containing 5 [Source:HGNC Symbol;Acc:HGNC:20240]	protein_coding	5	2	4	1	21	0	37	0	2	0	50	1	27	15	42	46	38	28	10	2	152	7	6	0	0	0	25	4	8	0	36	0	40	2	3	13	5	2	4	1	0	0	35	59	18
ENSG00000121905	ENSG00000121905	HPCA	hippocalcin [Source:HGNC Symbol;Acc:HGNC:5144]	protein_coding	71	73	32	31	251	67	175	19	46	29	92	30	145	42	77	0	35	23	31	13	272	62	222	41	16	34	51	30	450	16	140	22	84	91	2	4	106	36	146	71	0	1	2	1	153
ENSG00000121900	ENSG00000121900	TMEM54	transmembrane protein 54 [Source:HGNC Symbol;Acc:HGNC:24143]	protein_coding	104	103	41	47	356	78	250	30	58	33	130	45	197	60	98	0	49	23	47	18	403	82	317	58	28	50	59	36	639	51	183	25	111	124	4	4	192	94	275	147	4	0	24	61	283
ENSG00000287691	ENSG00000287691		novel transcript, antisense to RNF19B	lncRNA	6	9	1	10	6	11	8	1	2	29	11	19	19	2	10	0	3	3	0	5	33	4	21	8	3	37	7	14	3	3	10	12	2	7	19	1	28	1	14	0	0	94	0	0	2
ENSG00000278966	ENSG00000278966		TEC	TEC	1	0	0	1	4	1	3	4	0	2	0	2	0	1	0	0	1	8	0	0	7	2	2	2	2	7	2	2	1	0	1	0	0	1	2	34	7	0	22	0	0	1	11	0	10
ENSG00000143222	ENSG00000143222	UFC1	ubiquitin-fold modifier conjugating enzyme 1 [Source:HGNC Symbol;Acc:HGNC:26941]	protein_coding	643	1417	315	396	1212	681	1156	695	453	1433	610	2060	908	1033	486	833	259	1124	306	523	1091	1151	1318	815	127	1102	681	1326	1753	1289	617	527	470	1864	703	1985	813	2159	682	1683	1066	2866	5753	1215	386
ENSG00000224985	ENSG00000224985		novel transcript	lncRNA	197	305	84	100	385	180	333	188	137	377	211	551	251	267	148	257	84	309	80	151	264	273	383	229	33	309	158	353	501	383	174	143	135	572	110	388	157	447	126	381	225	559	838	153	57
ENSG00000143224	ENSG00000143224	PPOX	protoporphyrinogen oxidase [Source:HGNC Symbol;Acc:HGNC:9280]	protein_coding	100	276	33	73	245	195	226	137	97	177	96	265	235	231	166	95	71	425	29	182	198	318	373	415	45	240	197	300	396	479	152	97	66	314	190	471	219	778	61	281	0	15	56	30	68
ENSG00000158850	ENSG00000158850	B4GALT3	beta-1,4-galactosyltransferase 3 [Source:HGNC Symbol;Acc:HGNC:926]	protein_coding	242	685	94	112	249	217	403	517	183	180	196	908	457	291	109	195	157	699	85	350	450	478	768	819	79	535	123	243	772	824	197	196	130	1049	20	754	160	476	171	243	0	576	39	49	256
ENSG00000158859	ENSG00000158859	ADAMTS4	ADAM metallopeptidase with thrombospondin type 1 motif 4 [Source:HGNC Symbol;Acc:HGNC:220]	protein_coding	309	339	221	91	140	160	166	100	30	144	41	69	999	180	541	258	33	131	20	77	504	573	153	43	53	37	216	68	1153	127	525	71	151	194	365	20	196	439	263	766	1	4	115	83	154
ENSG00000158869	ENSG00000158869	FCER1G	Fc epsilon receptor Ig [Source:HGNC Symbol;Acc:HGNC:3611]	protein_coding	3215	5396	1035	1736	3417	3348	5665	3465	1426	4862	2118	5994	1979	5554	1051	4970	845	4264	973	2500	2603	6761	2740	3469	593	6942	2163	2960	3342	5787	1227	2299	1147	12996	979	7815	4058	6478	3688	15251	3563	12459	27223	2151	3296
ENSG00000158874	ENSG00000158874	APOA2	apolipoprotein A2 [Source:HGNC Symbol;Acc:HGNC:601]	protein_coding	26	43	17	8	28	157	478	22	14	116	154	400	83	7363	34	38	23	34	1	0	383	41	177	7	34	1058	9	19	15	55	12	2	6	58	54	82	651	737	129	560	706	397	0	31	144
ENSG00000158882	ENSG00000158882	TOMM40L	translocase of outer mitochondrial membrane 40 like [Source:HGNC Symbol;Acc:HGNC:25756]	protein_coding	75	213	45	100	349	87	110	158	48	212	62	515	192	297	46	106	65	222	26	56	209	259	388	138	34	115	97	173	141	336	58	93	20	429	2	115	234	85	49	279	2	0	61	25	31
ENSG00000284035	ENSG00000284035	MIR5187	microRNA 5187 [Source:HGNC Symbol;Acc:HGNC:43523]	miRNA	0	14	0	6	23	5	3	8	6	9	4	25	6	12	1	4	2	4	0	5	4	12	20	4	7	4	4	8	3	10	1	11	0	23	0	6	9	2	1	8	0	0	0	0	0
ENSG00000143257	ENSG00000143257	NR1I3	nuclear receptor subfamily 1 group I member 3 [Source:HGNC Symbol;Acc:HGNC:7969]	protein_coding	29	99	30	47	177	56	52	84	20	130	30	250	93	161	39	53	38	136	14	50	139	173	164	71	4	100	57	114	87	236	23	47	11	165	2	57	115	38	51	108	3	2	12	59	28
ENSG00000188931	ENSG00000188931	CFAP126	cilia and flagella associated protein 126 [Source:HGNC Symbol;Acc:HGNC:32325]	protein_coding	6	15	0	11	17	3	27	2	1	33	0	0	16	6	1	4	11	13	0	27	26	82	17	9	5	15	0	16	42	27	5	1	2	9	26	1	23	1	22	22	0	0	0	19	11
ENSG00000236484	ENSG00000236484	RRM2P2	ribonucleotide reductase M2 polypeptide pseudogene 2 [Source:HGNC Symbol;Acc:HGNC:10454]	processed_pseudogene	0	1	0	1	0	2	0	0	0	0	0	1	0	0	2	0	1	8	1	0	0	0	0	0	3	1	2	1	0	2	0	1	0	0	0	3	0	0	3	0	0	0	0	1	6
ENSG00000283696	ENSG00000283696		novel transcript	lncRNA	8	15	3	12	0	18	11	13	13	40	7	30	0	4	9	0	7	26	1	22	0	10	8	17	0	25	14	10	20	62	14	10	6	46	33	1	14	0	1	0	0	0	13	69	6
ENSG00000288093	ENSG00000288093		novel transcript	lncRNA	2	14	1	15	2	20	2	14	8	25	0	1	4	7	32	4	8	1	3	37	0	33	11	21	7	10	17	28	26	20	27	19	5	30	10	8	13	5	13	3	0	0	0	38	29
ENSG00000215840	ENSG00000215840		ribosomal protein S2 (RPS2) pseudogene	processed_pseudogene	2	8	2	1	2	1	5	1	2	15	1	10	1	15	1	0	0	4	0	7	5	14	4	1	0	8	2	4	7	26	1	1	0	9	0	37	4	0	2	0	1	0	0	2	7
ENSG00000277882	ENSG00000277882		COMM domain containing 6 (COMMD6) pseudogene	processed_pseudogene	0	9	0	3	3	0	0	0	4	5	0	0	0	0	1	1	2	5	1	4	5	3	8	0	0	6	5	5	0	10	0	0	0	0	24	1	1	0	5	0	0	3	0	0	0
ENSG00000277762	ENSG00000277762	RN7SL261P	RNA, 7SL, cytoplasmic 261, pseudogene [Source:HGNC Symbol;Acc:HGNC:46277]	misc_RNA	0	17	2	0	15	7	0	3	12	7	0	0	0	0	5	0	0	0	0	6	4	14	12	11	6	2	5	9	0	0	2	1	0	0	0	0	3	1	1	0	0	0	0	6	0
ENSG00000227139	ENSG00000227139		novel transcript	lncRNA	0	0	0	0	0	3	0	0	0	0	0	0	0	0	0	0	0	11	0	4	0	14	0	5	0	0	1	4	1	0	0	0	0	1	1	0	0	0	0	0	0	0	3	0	2
ENSG00000265107	ENSG00000265107	GJA5	gap junction protein alpha 5 [Source:HGNC Symbol;Acc:HGNC:4279]	protein_coding	71	229	91	229	291	292	126	100	78	329	156	101	159	112	338	196	87	147	57	159	634	191	263	147	44	246	178	228	269	71	360	35	12	392	0	151	320	2	101	200	446	624	73	55	20
ENSG00000274415	ENSG00000274415		novel transcript, antisense to GJA5	lncRNA	29	112	57	110	168	145	53	40	35	150	69	34	95	52	202	97	41	77	22	89	307	91	117	78	28	118	92	117	123	29	167	21	5	195	0	50	138	0	55	76	227	319	0	34	2
ENSG00000223728	ENSG00000223728		PRAME family member 17 (PRAMEF17) pseudogene	processed_pseudogene	0	0	0	1	0	0	0	0	0	0	0	0	0	0	0	0	0	0	0	0	0	0	0	0	0	3	1	0	1	0	0	0	0	0	0	0	0	0	2	0	0	0	34	31	5
ENSG00000121634	ENSG00000121634	GJA8	gap junction protein alpha 8 [Source:HGNC Symbol;Acc:HGNC:4281]	protein_coding	2	4	0	17	36	23	0	2	4	14	0	0	0	3	3	11	3	1	0	19	3	72	5	32	5	12	10	4	13	18	24	5	1	2	5	0	13	1	15	8	0	0	0	10	3
ENSG00000188092	ENSG00000188092	GPR89B	G protein-coupled receptor 89B [Source:HGNC Symbol;Acc:HGNC:13840]	protein_coding	5	54	3	6	21	8	39	6	1	16	23	127	18	13	8	17	18	61	11	11	18	60	13	30	5	17	7	36	80	42	7	21	0	43	2	2	0	1	41	0	2	0	16	4	106
ENSG00000215859	ENSG00000215859	PDZK1P1	PDZ domain containing 1 pseudogene 1 [Source:HGNC Symbol;Acc:HGNC:31974]	transcribed_unprocessed_pseudogene	2	35	7	2	3	0	8	5	8	4	25	2	0	1	8	2	2	10	0	11	21	35	11	5	2	9	7	7	65	19	38	6	9	11	8	18	58	0	31	2	1	0	0	41	6
ENSG00000274372	ENSG00000274372	LINC02804	long intergenic non-protein coding RNA 2804 [Source:HGNC Symbol;Acc:HGNC:54338]	lncRNA	2	0	3	6	2	9	0	3	11	0	0	0	0	0	10	0	0	20	3	15	26	0	21	0	2	3	3	3	53	0	20	0	17	37	1	1	14	0	23	17	376	0	0	60	14
ENSG00000229828	ENSG00000229828	PDE4DIPP1	PDE4DIP pseudogene 1 [Source:HGNC Symbol;Acc:HGNC:50867]	unprocessed_pseudogene	0	6	0	5	1	7	0	0	1	3	0	0	0	0	0	0	2	9	0	2	30	15	45	1	1	0	3	4	0	0	0	1	0	0	4	1	4	2	0	18	0	0	0	6	6
ENSG00000198658	ENSG00000198658	ABHD17AP1	ABHD17A pseudogene 1 [Source:HGNC Symbol;Acc:HGNC:28394]	unprocessed_pseudogene	5	8	4	1	1	3	7	3	1	6	1	6	0	6	3	5	1	3	0	1	5	6	6	5	2	10	3	3	7	2	1	2	2	8	0	13	6	3	6	19	0	1	17	2	19
ENSG00000236497	ENSG00000236497	LINC01744	long intergenic non-protein coding RNA 1744 [Source:HGNC Symbol;Acc:HGNC:52532]	lncRNA	0	10	1	2	11	9	0	1	1	22	0	0	0	1	2	0	2	7	0	23	4	6	0	0	1	13	3	4	0	48	1	3	1	0	11	2	0	0	1	0	0	0	12	68	5
ENSG00000284928	ENSG00000284928		novel transcript	lncRNA	0	0	0	0	1	2	0	0	0	13	0	0	0	0	0	0	0	1	0	13	0	9	8	7	0	1	0	0	2	33	0	7	0	0	3	0	0	1	0	1	1	1	0	38	12
ENSG00000223949	ENSG00000223949	ROR1-AS1	ROR1 antisense RNA 1 [Source:HGNC Symbol;Acc:HGNC:40508]	lncRNA	1	16	9	18	24	10	1	4	5	7	0	11	2	0	14	0	16	7	1	96	2	108	28	57	7	12	17	22	18	15	7	2	1	3	8	7	7	18	12	22	0	0	31	23	66
ENSG00000116688	ENSG00000116688	MFN2	mitofusin 2 [Source:HGNC Symbol;Acc:HGNC:16877]	protein_coding	2326	2380	345	398	1627	1718	2271	1244	687	2532	1399	2514	2236	1533	1358	2436	870	2581	467	1180	2143	2996	2099	1885	565	2524	1490	2139	3742	4509	1058	1027	692	3468	559	1693	3183	1805	2492	2312	3600	4298	30	112	84
ENSG00000188800	ENSG00000188800	TMCO2	transmembrane and coiled-coil domains 2 [Source:HGNC Symbol;Acc:HGNC:23312]	protein_coding	0	10	1	7	6	19	0	9	4	1	0	19	0	1	11	2	7	5	4	3	5	12	7	4	5	2	5	22	16	11	4	0	1	3	6	0	0	0	0	0	0	0	0	13	1
ENSG00000084073	ENSG00000084073	ZMPSTE24	zinc metallopeptidase STE24 [Source:HGNC Symbol;Acc:HGNC:12877]	protein_coding	298	337	141	103	344	179	440	122	207	121	317	413	523	225	274	237	168	252	91	193	867	351	387	161	61	319	176	269	550	165	204	172	130	356	208	2	24	1	355	194	3	0	49	100	21
ENSG00000231296	ENSG00000231296		pseudogene similar to part of RIO kinase 2 (yeast) (RIOK2)	processed_pseudogene	3	31	3	0	13	6	5	0	2	0	3	15	5	0	1	0	1	2	1	6	20	4	17	3	3	12	8	18	9	3	4	2	1	1	2	1	13	0	0	0	0	0	0	0	3
ENSG00000049089	ENSG00000049089	COL9A2	collagen type IX alpha 2 chain [Source:HGNC Symbol;Acc:HGNC:2218]	protein_coding	60	67	7	8	44	123	48	2	56	39	24	322	22	72	12	111	24	80	16	52	118	20	60	97	23	107	98	83	198	204	80	83	29	130	131	38	11	7	48	1	18	0	85	93	40
ENSG00000284677	ENSG00000284677		novel transcript	lncRNA	0	0	0	0	15	22	1	0	0	1	0	14	0	0	0	0	0	14	0	1	0	0	0	5	0	0	0	12	0	0	7	0	0	0	1	1	2	0	0	1	0	0	0	4	7
ENSG00000187801	ENSG00000187801	ZFP69B	ZFP69 zinc finger protein B [Source:HGNC Symbol;Acc:HGNC:28053]	protein_coding	0	28	3	24	126	0	6	34	26	52	51	163	23	30	0	11	0	83	4	17	82	59	52	52	0	18	0	37	63	102	15	27	0	26	3	19	25	174	0	38	0	328	0	0	8
ENSG00000260920	ENSG00000260920		novel transcript, sense overlapping with ZNF643	lncRNA	0	40	0	16	103	18	6	13	6	3	0	173	9	7	18	20	7	59	0	57	17	118	24	34	5	50	5	30	55	66	11	9	0	8	36	0	0	0	10	51	0	0	4	25	1
ENSG00000158887	ENSG00000158887	MPZ	myelin protein zero [Source:HGNC Symbol;Acc:HGNC:7225]	protein_coding	2	9	1	2	3	6	4	3	6	2	3	13	0	7	1	1	0	4	0	4	10	8	2	2	2	5	6	22	0	0	0	3	1	8	14	5	7	15	19	10	76	0	13	11	7
ENSG00000255054	ENSG00000255054		novel protein	protein_coding	226	344	104	110	406	206	409	185	120	375	130	440	295	217	240	357	97	249	88	114	556	374	418	290	54	335	290	275	645	374	135	113	109	468	285	205	324	250	455	221	1041	636	38	1094	110
ENSG00000228172	ENSG00000228172		novel transcript	lncRNA	59	100	33	34	246	69	115	64	43	111	60	120	92	84	55	140	35	53	23	32	134	139	140	91	10	94	86	74	183	86	41	26	32	175	140	58	89	141	121	72	250	153	68	252	60
ENSG00000117640	ENSG00000117640	MTFR1L	mitochondrial fission regulator 1 like [Source:HGNC Symbol;Acc:HGNC:28836]	protein_coding	1132	1566	699	613	2190	1133	2097	856	699	1839	777	2424	1660	989	982	1806	386	1344	476	502	2634	1795	2375	1558	274	1642	1468	1447	3341	1810	894	442	667	2381	1202	1156	1432	1287	2416	892	5933	3369	133	5925	646
ENSG00000272478	ENSG00000272478		novel transcript, antisense to MTFR1L	lncRNA	430	664	292	208	781	460	892	327	288	740	353	952	695	379	423	718	165	498	188	169	1036	721	991	634	111	691	607	569	1337	739	362	184	251	986	283	338	507	410	867	294	1928	1137	11	1699	175
ENSG00000127423	ENSG00000127423	AUNIP	aurora kinase A and ninein interacting protein [Source:HGNC Symbol;Acc:HGNC:28363]	protein_coding	468	859	301	235	921	552	954	476	317	1212	404	1203	782	547	511	837	188	720	213	269	1120	794	1103	789	125	1042	801	849	1400	1185	411	199	265	1130	306	357	529	432	907	440	2030	1436	27	1842	191
ENSG00000182749	ENSG00000182749	PAQR7	progestin and adipoQ receptor family member 7 [Source:HGNC Symbol;Acc:HGNC:23146]	protein_coding	1	40	3	2	23	13	18	0	2	84	0	14	15	10	45	1	3	12	11	18	1	14	19	22	2	18	9	18	32	48	16	4	9	19	36	4	2	4	4	0	20	0	0	11	14
ENSG00000207302	ENSG00000207302	Y_RNA	Y RNA [Source:RFAM;Acc:RF00019]	misc_RNA	4	7	0	1	11	3	2	0	6	2	0	0	0	0	1	0	0	7	2	12	1	6	4	2	4	0	5	10	7	11	10	0	0	1	4	0	2	0	11	4	0	0	7	0	1
ENSG00000117632	ENSG00000117632	STMN1	stathmin 1 [Source:HGNC Symbol;Acc:HGNC:6510]	protein_coding	608	3190	346	593	1934	1439	1555	1479	821	4513	1023	4160	1912	4032	661	1188	297	2620	449	884	1189	1211	2521	2559	350	4182	4366	4870	2136	4078	864	655	423	2356	1361	1130	1221	3024	711	1493	2808	4710	6050	3	1442
ENSG00000283938	ENSG00000283938	MIR3917	microRNA 3917 [Source:HGNC Symbol;Acc:HGNC:38911]	miRNA	88	350	50	57	188	168	203	146	89	530	108	457	182	511	86	144	39	263	45	93	161	162	259	285	29	489	573	682	234	488	91	66	42	259	88	57	94	231	61	148	149	336	513	0	97
ENSG00000187147	ENSG00000187147	RNF220	ring finger protein 220 [Source:HGNC Symbol;Acc:HGNC:25552]	protein_coding	260	695	96	182	535	407	315	380	152	526	242	990	347	496	258	357	130	783	92	321	439	931	470	464	76	508	302	510	610	877	217	313	114	1136	224	672	569	527	467	1129	932	1563	43	119	139
ENSG00000126106	ENSG00000126106	TMEM53	transmembrane protein 53 [Source:HGNC Symbol;Acc:HGNC:26186]	protein_coding	173	442	60	152	323	228	199	212	112	312	139	554	233	301	162	220	84	409	39	189	332	479	298	256	34	294	202	282	348	410	161	162	84	721	84	530	284	271	256	1014	505	1018	25	38	413
ENSG00000198520	ENSG00000198520	ARMH1	armadillo like helical domain containing 1 [Source:HGNC Symbol;Acc:HGNC:34345]	protein_coding	35	251	22	29	88	168	99	66	33	230	39	256	68	166	44	50	20	143	9	69	11	136	93	110	42	150	225	438	76	233	47	84	12	255	97	23	89	388	100	325	1	177	1726	41	106
ENSG00000142945	ENSG00000142945	KIF2C	kinesin family member 2C [Source:HGNC Symbol;Acc:HGNC:6393]	protein_coding	62	402	8	155	181	265	156	284	116	678	231	516	238	475	101	271	48	444	48	230	64	323	176	648	51	990	368	526	105	1001	47	25	26	108	99	548	46	714	21	490	0	642	30	33	41
ENSG00000142937	ENSG00000142937	RPS8	ribosomal protein S8 [Source:HGNC Symbol;Acc:HGNC:10441]	protein_coding	1922	4541	850	1478	4125	3345	3561	2226	937	3632	1908	7358	1854	3668	1381	2921	783	4211	726	1556	3389	3796	3649	3356	354	3670	1768	2852	4578	3927	1499	1750	1192	8989	2239	2533	2462	5622	2907	3626	4567	5729	9993	1261	1897
ENSG00000264294	ENSG00000264294	SNORD55	small nucleolar RNA, C/D box 55 [Source:HGNC Symbol;Acc:HGNC:10205]	snoRNA	5	11	2	0	15	12	10	3	0	6	11	10	11	3	0	4	0	16	1	3	15	5	9	0	0	7	1	2	12	18	6	10	1	15	76	7	0	104	21	28	4	0	0	0	1
ENSG00000234093	ENSG00000234093	RPS15AP11	ribosomal protein S15a pseudogene 11 [Source:HGNC Symbol;Acc:HGNC:36707]	processed_pseudogene	1	2	0	6	1	6	0	0	1	20	0	7	0	1	0	3	1	9	0	15	0	45	1	0	0	3	2	3	0	5	2	2	0	2	0	1	1	1	1	0	1	0	0	27	1
ENSG00000142959	ENSG00000142959	BEST4	bestrophin 4 [Source:HGNC Symbol;Acc:HGNC:17106]	protein_coding	2	2	0	17	16	4	3	0	3	10	2	14	3	4	17	1	14	26	0	10	9	3	19	13	3	13	3	29	17	25	15	6	0	0	123	14	2	7	9	1	3	0	28	16	20
ENSG00000173846	ENSG00000173846	PLK3	polo like kinase 3 [Source:HGNC Symbol;Acc:HGNC:2154]	protein_coding	858	540	241	114	958	271	1266	287	209	430	214	1081	752	492	573	657	249	405	190	160	676	311	592	479	19	279	255	503	1328	729	665	903	304	2686	1298	1341	978	202	574	512	939	708	26	22	418
ENSG00000117425	ENSG00000117425	PTCH2	patched 2 [Source:HGNC Symbol;Acc:HGNC:9586]	protein_coding	3	12	1	13	5	9	1	3	1	19	0	0	0	0	9	5	6	16	2	12	9	62	6	24	1	6	3	18	41	51	11	6	1	2	94	22	16	9	16	19	0	0	121	89	98
ENSG00000226499	ENSG00000226499		ribosomal protein S2 (RPS2) pseudogene	processed_pseudogene	0	3	1	2	8	3	8	1	0	10	0	3	1	0	15	0	2	2	1	0	2	6	4	2	2	5	6	10	6	0	2	1	1	2	9	13	0	3	16	0	2	1	1	0	11
ENSG00000070785	ENSG00000070785	EIF2B3	eukaryotic translation initiation factor 2B subunit gamma [Source:HGNC Symbol;Acc:HGNC:3259]	protein_coding	141	744	83	188	768	327	299	374	100	352	207	670	251	380	373	222	64	553	129	207	376	708	454	471	72	638	180	315	576	770	200	272	142	816	287	649	220	927	378	784	605	388	38	54	252
ENSG00000268949	ENSG00000268949	MRPS17P1	mitochondrial ribosomal protein S17 pseudogene 1 [Source:HGNC Symbol;Acc:HGNC:29734]	processed_pseudogene	0	13	9	4	15	17	2	3	2	0	0	7	1	0	11	0	2	27	1	18	2	31	1	11	13	11	9	25	14	29	5	2	2	0	112	17	3	53	45	2	0	0	0	27	32
ENSG00000126107	ENSG00000126107	HECTD3	HECT domain E3 ubiquitin protein ligase 3 [Source:HGNC Symbol;Acc:HGNC:26117]	protein_coding	198	894	82	178	409	538	501	378	140	440	257	1175	317	445	74	226	142	608	131	258	380	728	992	611	24	663	295	644	1319	722	281	201	101	892	639	9	55	472	307	507	1049	113	40	96	38
ENSG00000126088	ENSG00000126088	UROD	uroporphyrinogen decarboxylase [Source:HGNC Symbol;Acc:HGNC:12591]	protein_coding	1146	5021	628	1383	2943	3299	1850	3568	891	4145	1783	5233	1860	2529	1108	2494	807	8463	502	3740	2614	2966	4997	7479	605	7217	1505	2821	4704	11733	1205	1307	779	6481	1116	5215	2832	6206	1772	2647	1443	5345	11394	4624	721
ENSG00000162408	ENSG00000162408	NOL9	nucleolar protein 9 [Source:HGNC Symbol;Acc:HGNC:26265]	protein_coding	61	174	29	72	141	246	91	81	89	184	38	486	29	181	72	70	24	230	23	111	168	325	176	186	48	250	112	333	183	361	101	56	25	254	286	11	205	26	60	71	8	44	264	70	82
ENSG00000229519	ENSG00000229519		ribosomal protein L34 (RPL34) pseudogene	processed_pseudogene	0	2	1	1	0	0	3	0	0	1	0	5	4	0	4	0	0	4	0	3	1	17	3	0	4	3	1	4	12	2	0	1	0	1	15	0	0	0	6	12	0	0	0	0	3
ENSG00000173662	ENSG00000173662	TAS1R1	taste 1 receptor member 1 [Source:HGNC Symbol;Acc:HGNC:14448]	protein_coding	1	31	3	15	1	52	1	0	0	10	0	0	0	0	14	1	5	38	0	6	2	83	0	2	0	1	0	18	3	31	11	0	0	4	68	9	0	5	6	57	4	0	32	55	12
ENSG00000204859	ENSG00000204859	ZBTB48	zinc finger and BTB domain containing 48 [Source:HGNC Symbol;Acc:HGNC:4930]	protein_coding	188	177	47	113	323	284	226	94	62	177	142	488	180	129	43	185	48	123	38	71	207	30	207	122	29	134	181	120	275	265	176	109	50	467	617	667	153	273	125	361	7	8	144	65	151
ENSG00000288629	ENSG00000288629		novel protein	protein_coding	16	24	4	3	0	1	13	6	4	19	3	13	22	18	16	4	3	35	5	5	1	30	14	4	6	14	4	5	7	15	0	7	8	9	43	0	0	0	7	5	0	0	0	0	0
ENSG00000171488	ENSG00000171488	LRRC8C	leucine rich repeat containing 8 VRAC subunit C [Source:HGNC Symbol;Acc:HGNC:25075]	protein_coding	95	202	46	52	131	148	131	44	45	118	26	1051	144	257	161	0	52	112	32	134	82	341	121	101	61	88	46	114	43	229	55	30	14	252	546	2	56	7	22	297	557	704	139	49	26
ENSG00000070886	ENSG00000070886	EPHA8	EPH receptor A8 [Source:HGNC Symbol;Acc:HGNC:3391]	protein_coding	2	0	0	10	2	1	0	0	8	0	0	0	0	5	0	1	3	0	2	2	2	30	5	7	0	1	1	14	7	13	9	0	0	2	13	22	10	5	6	0	12	0	51	155	59
ENSG00000223776	ENSG00000223776	LGALS8-AS1	LGALS8 antisense RNA 1 [Source:HGNC Symbol;Acc:HGNC:40340]	lncRNA	30	85	13	25	70	59	71	37	20	79	26	88	53	95	18	43	21	74	6	51	81	101	65	51	9	94	41	64	103	91	20	44	17	103	25	32	52	81	26	189	100	102	639	9	46
ENSG00000273058	ENSG00000273058		novel transcript	lncRNA	0	8	2	2	0	33	0	0	0	12	0	0	0	1	0	0	0	1	0	0	0	17	0	6	0	11	0	9	0	22	0	0	2	0	0	0	0	0	0	0	0	0	0	49	1
ENSG00000230325	ENSG00000230325		novel transcript	lncRNA	83	185	26	58	64	140	91	120	48	227	67	235	82	167	47	114	40	231	31	87	210	111	120	92	26	120	102	142	267	261	79	82	29	208	138	110	94	137	49	109	20	94	42	0	32
ENSG00000119285	ENSG00000119285	HEATR1	HEAT repeat containing 1 [Source:HGNC Symbol;Acc:HGNC:25517]	protein_coding	496	1751	151	432	748	1221	737	797	381	1189	415	1829	763	1334	377	892	328	1528	243	682	1068	904	1110	925	143	1292	915	1094	1392	2073	410	612	215	1389	876	668	685	624	541	821	259	664	650	3569	169
ENSG00000226498	ENSG00000226498	RPSAP21	ribosomal protein SA pseudogene 21 [Source:HGNC Symbol;Acc:HGNC:36928]	processed_pseudogene	0	21	3	0	0	20	1	1	2	22	0	0	0	4	27	0	7	8	1	23	12	40	6	1	3	8	16	23	2	54	10	1	0	15	129	0	1	1	43	0	0	0	0	4	3
ENSG00000244020	ENSG00000244020	MT1HL1	metallothionein 1H like 1 [Source:HGNC Symbol;Acc:HGNC:31864]	protein_coding	0	0	0	0	20	11	0	0	1	10	0	0	2	1	0	0	0	9	0	7	0	30	2	0	4	6	0	10	7	8	3	0	0	10	57	0	2	0	0	0	0	0	0	0	4
ENSG00000225886	ENSG00000225886		novel transcript, antisense to IFI6	lncRNA	0	6	0	4	36	4	1	1	4	13	0	12	0	4	9	0	0	8	3	13	0	12	1	3	2	4	0	32	3	51	3	2	0	0	0	11	0	0	0	0	3	0	1	28	2
ENSG00000206767	ENSG00000206767	RNU6-949P	RNA, U6 small nuclear 949, pseudogene [Source:HGNC Symbol;Acc:HGNC:47912]	snRNA	0	1	1	8	24	0	1	1	13	21	0	2	0	1	4	0	1	3	0	7	0	15	2	0	4	3	3	16	0	30	4	4	0	0	0	9	0	0	0	0	0	0	2	0	0
ENSG00000287244	ENSG00000287244		novel transcript	lncRNA	0	0	0	0	0	8	0	0	0	16	0	0	0	0	1	0	0	0	0	10	0	20	0	0	0	0	0	9	2	0	0	0	0	0	14	3	2	0	1	0	0	0	111	29	5
ENSG00000230833	ENSG00000230833	RPEP3	ribulose-5-phosphate-3-epimerase pseudogene 3 [Source:HGNC Symbol;Acc:HGNC:44522]	processed_pseudogene	0	1	0	21	0	2	0	4	0	0	0	1	0	0	3	0	0	0	0	10	0	0	0	13	0	1	2	20	1	24	0	1	0	0	1	6	0	0	14	0	0	0	37	0	5
ENSG00000117758	ENSG00000117758	STX12	syntaxin 12 [Source:HGNC Symbol;Acc:HGNC:11430]	protein_coding	1026	2367	600	541	2100	1160	1716	1119	643	2209	993	2237	1168	2027	822	1227	444	1691	455	934	2276	1851	2334	1012	207	1245	656	860	2743	1634	722	815	396	2181	810	535	749	1183	756	1461	1204	267	22	18	37
ENSG00000286433	ENSG00000286433		novel transcript, antisense to PPP1R8	lncRNA	9	37	1	16	40	26	12	8	17	67	5	34	17	10	14	13	8	55	2	14	76	11	26	17	7	28	13	37	31	43	21	3	1	35	5	3	4	2	4	18	0	0	48	7	8
ENSG00000117751	ENSG00000117751	PPP1R8	protein phosphatase 1 regulatory subunit 8 [Source:HGNC Symbol;Acc:HGNC:9296]	protein_coding	174	391	34	57	190	210	204	136	123	270	130	667	224	281	160	201	137	379	80	123	469	200	267	255	34	265	150	239	387	433	156	128	76	473	132	5	55	3	113	109	0	1	0	7	13
ENSG00000130775	ENSG00000130775	THEMIS2	thymocyte selection associated family member 2 [Source:HGNC Symbol;Acc:HGNC:16839]	protein_coding	2942	2445	876	843	4427	3399	5266	1675	1456	2908	1581	4882	1793	1579	778	3662	1165	3858	727	1317	2140	2954	2242	2054	283	3459	2006	2281	2863	5118	1320	1882	728	6951	2527	1693	5391	4793	1980	4796	2358	6921	2165	60	1847
ENSG00000117748	ENSG00000117748	RPA2	replication protein A2 [Source:HGNC Symbol;Acc:HGNC:10290]	protein_coding	1558	2391	518	647	2219	1856	2189	979	812	2576	1327	5531	1438	2086	622	1413	626	2484	796	1540	1763	1486	1562	1691	261	2923	1737	2370	3096	3417	867	1400	505	3447	715	3168	2308	2417	1389	2567	2988	4689	8	2939	876
ENSG00000230239	ENSG00000230239	PDE4DIPP9	PDE4DIP pseudogene 9 [Source:HGNC Symbol;Acc:HGNC:55100]	unprocessed_pseudogene	0	5	2	7	1	5	0	3	3	5	0	0	0	0	0	0	0	0	0	6	27	6	0	3	0	1	0	0	0	0	2	0	0	1	5	1	0	0	0	0	1	0	9	23	12
ENSG00000235241	ENSG00000235241		cyclin-dependent kinase 5 (CDK5) pseudogene	processed_pseudogene	33	16	12	9	47	28	48	26	25	52	11	26	23	31	17	44	10	32	6	7	75	44	61	35	0	16	22	9	43	42	19	14	8	57	13	48	59	23	64	90	111	199	0	3	38
ENSG00000272426	ENSG00000272426		novel transcript	lncRNA	1	11	0	10	34	7	1	4	7	10	0	0	1	6	20	9	1	16	0	4	13	30	1	22	0	11	4	15	12	45	9	5	1	1	0	0	0	0	10	1	0	0	0	0	44
ENSG00000117122	ENSG00000117122	MFAP2	microfibril associated protein 2 [Source:HGNC Symbol;Acc:HGNC:7033]	protein_coding	37	0	19	0	239	4	66	10	6	0	0	3	111	0	48	3	16	1	2	0	269	15	214	3	11	0	59	1	401	0	74	0	43	0	67	7	119	4	118	6	7	0	0	56	209
ENSG00000286898	ENSG00000286898		novel transcript, antisense to MFAP2	lncRNA	6	0	4	0	74	0	10	4	1	0	0	0	28	0	29	0	6	0	0	0	64	7	64	0	4	0	18	0	108	0	19	0	3	0	4	0	30	2	34	5	0	0	0	25	65
ENSG00000226526	ENSG00000226526		novel transcript	lncRNA	10	27	3	9	3	18	16	13	0	0	19	51	38	14	6	12	10	19	4	12	33	32	8	18	1	55	6	26	16	40	6	15	2	48	0	7	5	1	16	0	3	0	0	25	7
ENSG00000159363	ENSG00000159363	ATP13A2	ATPase cation transporting 13A2 [Source:HGNC Symbol;Acc:HGNC:30213]	protein_coding	99	172	28	79	219	132	174	83	24	34	142	508	248	106	69	141	65	112	28	67	327	261	120	181	21	659	143	309	212	337	74	145	34	400	20	19	70	4	25	11	13	4	132	128	76
ENSG00000117118	ENSG00000117118	SDHB	succinate dehydrogenase complex iron sulfur subunit B [Source:HGNC Symbol;Acc:HGNC:10681]	protein_coding	2471	3251	651	760	2484	1771	3474	1348	1118	2720	1637	3806	1808	2700	820	1712	635	2532	694	1177	2257	3318	2500	2038	290	2706	1955	2498	3021	2407	1346	981	843	4984	1696	1201	2500	2252	1318	3180	4075	5076	11139	1511	1265
ENSG00000117115	ENSG00000117115	PADI2	peptidyl arginine deiminase 2 [Source:HGNC Symbol;Acc:HGNC:18341]	protein_coding	3628	2195	663	832	2832	4742	4470	2311	961	1796	1708	965	3519	2222	1231	3506	2387	7620	776	1632	1192	2528	4826	3356	120	2735	5911	7208	2083	3279	2299	3801	312	3034	524	4481	3315	435	1677	4769	1111	3518	630	53	810
ENSG00000204362	ENSG00000204362	LINC02783	long intergenic non-protein coding RNA 2783 [Source:HGNC Symbol;Acc:HGNC:54303]	lncRNA	0	0	2	10	11	3	1	5	4	3	0	0	2	0	1	0	2	21	2	15	4	13	9	31	1	5	4	3	0	55	3	2	0	2	22	13	6	5	1	1	21	0	61	40	34
ENSG00000282843	ENSG00000282843		novel transcript	lncRNA	0	0	0	0	1	2	1	0	0	0	0	0	0	0	0	0	2	0	2	5	0	0	0	13	1	0	0	2	0	28	1	0	0	1	14	7	4	2	5	0	0	0	8	3	11
ENSG00000142623	ENSG00000142623	PADI1	peptidyl arginine deiminase 1 [Source:HGNC Symbol;Acc:HGNC:18367]	protein_coding	0	25	1	17	4	32	3	4	3	28	0	15	0	0	5	4	15	23	11	30	7	23	7	1	8	33	19	11	9	39	2	4	0	0	23	25	18	11	8	3	4	1	175	95	47
ENSG00000142619	ENSG00000142619	PADI3	peptidyl arginine deiminase 3 [Source:HGNC Symbol;Acc:HGNC:18337]	protein_coding	1	12	2	9	44	45	2	4	1	15	0	3	1	2	5	11	1	30	0	18	4	53	15	32	5	20	1	21	76	27	9	7	4	4	26	8	5	4	0	3	14	0	204	20	36
ENSG00000273264	ENSG00000273264		novel transcript	lncRNA	0	10	1	7	0	17	2	0	0	1	0	0	0	0	10	0	0	16	2	1	0	0	1	5	1	3	0	3	0	8	4	0	4	3	0	2	0	0	4	0	0	0	1	0	0
ENSG00000282057	ENSG00000282057		novel transcript	lncRNA	1	28	1	21	38	37	7	1	8	12	0	0	0	1	43	1	5	12	3	35	15	18	5	12	4	47	8	18	77	17	2	0	4	16	8	78	8	12	27	7	5	5	47	38	14
ENSG00000230285	ENSG00000230285		novel transcript	lncRNA	0	1	0	0	0	5	0	0	9	0	0	0	0	0	0	0	0	0	0	3	0	0	0	0	0	4	0	0	0	0	0	0	0	0	0	0	0	0	10	0	5	0	0	0	0
ENSG00000142871	ENSG00000142871	CCN1	cellular communication network factor 1 [Source:HGNC Symbol;Acc:HGNC:2654]	protein_coding	294	19	190	6	847	1	475	22	154	32	177	0	1158	118	436	44	197	12	75	20	1154	165	518	59	52	15	192	14	2902	2	295	9	246	0	963	2	551	1	1239	64	896	1	8	13	131
ENSG00000234419	ENSG00000234419	CICP13	capicua transcriptional repressor pseudogene 13 [Source:HGNC Symbol;Acc:HGNC:37907]	processed_pseudogene	0	0	0	3	1	5	0	0	0	0	0	0	0	0	0	0	0	0	0	0	0	0	0	1	0	1	1	0	3	0	1	6	0	1	0	14	2	0	0	1	1	2	0	30	7
ENSG00000276997	ENSG00000276997		novel transcript	lncRNA	3	7	6	2	16	7	0	3	1	3	4	9	0	1	11	1	0	10	2	13	3	10	4	0	4	3	1	2	10	13	6	2	1	1	0	5	3	1	5	0	4	0	0	0	9
ENSG00000267305	ENSG00000267305		general transcription factor IIi (GTF2I) pseudogene	unprocessed_pseudogene	1	4	0	6	11	2	0	0	8	9	0	0	0	0	2	0	0	11	0	7	2	6	1	0	2	0	1	1	1	0	6	0	1	1	0	1	0	0	2	0	0	0	0	0	6
ENSG00000143512	ENSG00000143512	HHIPL2	HHIP like 2 [Source:HGNC Symbol;Acc:HGNC:25842]	protein_coding	0	33	6	43	3	30	0	13	8	18	0	0	0	0	12	0	4	17	0	35	15	76	7	6	0	9	20	41	5	42	0	2	4	17	12	98	2	1	4	44	0	0	11	33	19
ENSG00000143498	ENSG00000143498	TAF1A	TATA-box binding protein associated factor, RNA polymerase I subunit A [Source:HGNC Symbol;Acc:HGNC:11532]	protein_coding	14	121	13	60	73	157	41	27	11	69	0	38	35	124	57	41	3	90	25	88	198	41	33	27	21	116	68	71	50	104	111	32	26	56	220	1	6	223	105	162	8	0	8	4	4
ENSG00000225265	ENSG00000225265	TAF1A-AS1	TAF1A antisense RNA 1 [Source:HGNC Symbol;Acc:HGNC:40573]	lncRNA	2	53	2	35	49	51	9	8	25	31	2	34	25	17	47	6	5	39	3	72	47	58	35	9	27	39	17	42	14	65	25	15	4	8	92	1	18	21	19	36	4	0	0	9	94
ENSG00000154305	ENSG00000154305	MIA3	MIA SH3 domain ER export factor 3 [Source:HGNC Symbol;Acc:HGNC:24008]	protein_coding	269	287	68	49	148	349	227	102	215	310	280	472	346	267	169	118	61	455	96	267	364	185	444	237	79	564	171	192	1034	593	186	65	142	265	80	6	249	254	33	140	8	0	20	24	111
ENSG00000272750	ENSG00000272750		novel transcript, antisense to MIA3	lncRNA	70	68	11	1	28	74	86	22	50	54	57	158	91	80	48	19	16	70	25	90	87	29	149	43	19	185	48	41	312	154	49	24	37	92	0	3	55	82	36	60	2	0	0	3	6
ENSG00000186063	ENSG00000186063	AIDA	axin interactor, dorsalization associated [Source:HGNC Symbol;Acc:HGNC:25761]	protein_coding	439	736	140	222	971	440	704	542	380	683	484	1190	712	635	402	625	204	808	230	422	1240	678	1127	797	161	891	317	478	1869	963	441	364	300	894	164	614	185	218	596	268	193	267	6	21	132
ENSG00000162819	ENSG00000162819	BROX	BRO1 domain and CAAX motif containing [Source:HGNC Symbol;Acc:HGNC:26512]	protein_coding	830	1037	232	245	845	791	1044	484	464	878	825	1539	774	645	467	670	344	1092	237	572	953	1000	1074	726	90	974	467	785	1402	1078	486	549	219	1243	202	468	630	587	415	282	2997	880	12954	1466	403
ENSG00000287684	ENSG00000287684		novel transcript, antisense to FAM177B	lncRNA	11	25	4	8	27	26	4	17	17	3	0	3	10	19	22	19	30	92	2	30	17	4	2	17	16	48	4	17	12	50	3	1	8	39	13	2	2	2	19	20	2	0	12	7	15
ENSG00000234523	ENSG00000234523	NDUFB1P2	NADH:ubiquinone oxidoreductase subunit B1 pseudogene 2 [Source:HGNC Symbol;Acc:HGNC:37815]	processed_pseudogene	0	13	0	23	5	8	8	1	11	0	0	3	0	0	5	2	0	1	2	5	9	18	3	1	9	5	4	3	3	2	5	2	2	7	0	0	0	0	0	0	0	0	0	0	0
ENSG00000287338	ENSG00000287338		novel transcript	lncRNA	0	28	6	17	71	49	0	27	6	88	0	6	18	5	18	0	4	17	5	33	16	60	11	57	3	64	10	52	3	7	7	6	1	46	70	6	47	14	32	0	6	0	7	24	18
ENSG00000187554	ENSG00000187554	TLR5	toll like receptor 5 [Source:HGNC Symbol;Acc:HGNC:11851]	protein_coding	241	248	64	140	467	181	174	195	149	659	110	184	85	270	115	1031	148	836	131	357	72	590	425	480	85	361	92	330	531	812	226	238	56	782	431	49	305	5	542	116	8	910	85	39	223
ENSG00000226601	ENSG00000226601		novel transcript	lncRNA	0	17	0	0	0	1	0	4	0	0	0	0	0	0	0	1	0	0	0	22	0	40	0	1	0	10	0	6	1	0	5	0	0	0	83	0	0	0	33	3	0	0	0	8	5
ENSG00000164010	ENSG00000164010	ERMAP	erythroblast membrane associated protein (Scianna blood group) [Source:HGNC Symbol;Acc:HGNC:15743]	protein_coding	276	763	65	154	1064	593	350	443	151	525	549	546	354	230	294	347	300	1039	105	722	840	284	1091	654	107	894	319	486	771	944	353	271	97	675	318	168	765	936	130	409	288	844	982	153	177
ENSG00000164011	ENSG00000164011	ZNF691	zinc finger protein 691 [Source:HGNC Symbol;Acc:HGNC:28028]	protein_coding	99	87	14	9	164	77	168	47	67	171	32	204	122	86	81	0	28	26	8	61	257	82	94	144	11	95	89	75	178	39	33	40	43	142	139	2	158	1	93	196	0	0	0	33	6
ENSG00000233708	ENSG00000233708		epidermodysplasia verruciformis 1 (EVER1) pseudogene	processed_pseudogene	0	19	0	8	0	9	0	0	0	15	0	0	0	0	25	0	1	33	0	0	0	18	0	2	0	0	1	2	0	9	1	0	0	1	2	11	1	1	3	61	1	0	3	65	10
ENSG00000237090	ENSG00000237090	MKRN8P	makorin ring finger protein 8, pseudogene [Source:HGNC Symbol;Acc:HGNC:7120]	processed_pseudogene	0	0	0	0	0	23	0	0	3	38	0	0	1	0	0	0	0	6	0	13	0	0	0	0	3	0	1	10	2	0	0	0	0	0	0	0	1	6	0	0	0	0	4	0	4
ENSG00000283973	ENSG00000283973		novel transcript	lncRNA	6	9	0	9	18	13	4	14	1	1	0	20	0	2	7	0	0	47	3	5	0	5	12	24	0	61	1	15	0	11	9	1	0	16	4	3	5	1	3	0	0	1	0	16	2
ENSG00000154309	ENSG00000154309	DISP1	dispatched RND transporter family member 1 [Source:HGNC Symbol;Acc:HGNC:19711]	protein_coding	26	144	44	48	96	77	29	59	40	197	169	144	73	148	44	74	63	93	21	134	117	149	143	71	43	92	65	120	100	100	147	31	30	81	66	13	154	86	126	150	11	112	47	78	103
ENSG00000231407	ENSG00000231407	GORAB-AS1	GORAB antisense RNA 1 [Source:HGNC Symbol;Acc:HGNC:54051]	lncRNA	2	18	1	31	1	24	0	17	10	7	0	0	0	1	8	2	5	3	0	20	33	76	1	0	1	6	1	29	1	37	6	0	1	1	0	9	3	1	6	0	0	0	0	44	26
ENSG00000229570	ENSG00000229570	GAPDHP58	glyceraldehyde 3 phosphate dehydrogenase pseudogene 58 [Source:HGNC Symbol;Acc:HGNC:4142]	processed_pseudogene	0	13	0	0	0	0	0	0	0	0	3	0	0	0	0	1	0	0	0	16	0	2	0	0	0	16	0	9	1	0	3	0	1	0	0	0	0	1	0	1	0	0	0	3	5
ENSG00000203857	ENSG00000203857	HSD3B1	hydroxy-delta-5-steroid dehydrogenase, 3 beta- and steroid delta-isomerase 1 [Source:HGNC Symbol;Acc:HGNC:5217]	protein_coding	0	10	0	1	0	12	0	0	2	2	0	16	0	0	16	0	1	15	0	47	0	0	0	0	0	7	0	4	0	34	5	0	0	0	1	0	2	0	0	38	0	0	14	5	12
ENSG00000249798	ENSG00000249798	HSD3BP3	hydroxy-delta-5-steroid dehydrogenase, 3 beta, pseudogene 3 [Source:HGNC Symbol;Acc:HGNC:5221]	unprocessed_pseudogene	0	5	0	5	20	6	0	2	0	3	0	0	0	0	5	0	0	18	0	18	0	31	0	0	0	6	0	9	3	28	2	2	7	0	46	0	9	0	0	1	0	0	0	5	6
ENSG00000203855	ENSG00000203855	HSD3BP4	hydroxy-delta-5-steroid dehydrogenase, 3 beta, pseudogene 4 [Source:HGNC Symbol;Acc:HGNC:5222]	unprocessed_pseudogene	0	12	0	6	3	12	0	1	0	24	0	0	4	0	0	0	0	0	7	8	6	27	3	1	0	14	6	0	0	10	7	3	0	0	2	1	0	0	1	47	3	0	6	6	1
ENSG00000198857	ENSG00000198857	HSD3BP5	hydroxy-delta-5-steroid dehydrogenase, 3 beta, pseudogene 5 [Source:HGNC Symbol;Acc:HGNC:5223]	transcribed_unprocessed_pseudogene	0	11	0	0	1	0	0	2	0	6	0	1	5	0	3	0	0	6	0	8	0	16	0	0	0	13	0	3	0	24	0	2	0	7	1	0	4	4	4	25	0	0	0	0	7
ENSG00000143067	ENSG00000143067	ZNF697	zinc finger protein 697 [Source:HGNC Symbol;Acc:HGNC:32034]	protein_coding	0	11	7	1	0	5	23	9	0	1	0	2	2	4	0	0	0	4	0	7	0	0	3	0	2	3	7	13	0	20	10	8	0	6	56	15	3	3	36	5	4	0	45	66	39
ENSG00000134240	ENSG00000134240	HMGCS2	3-hydroxy-3-methylglutaryl-CoA synthase 2 [Source:HGNC Symbol;Acc:HGNC:5008]	protein_coding	0	5	7	5	0	107	31	6	13	21	103	180	0	334	5	1	2	11	0	24	58	25	0	11	1	56	13	10	27	63	4	5	5	3	2	3	41	4	32	0	4	0	45	0	20
ENSG00000134193	ENSG00000134193	REG4	regenerating family member 4 [Source:HGNC Symbol;Acc:HGNC:22977]	protein_coding	0	2	0	6	2	2	0	2	0	13	0	0	0	14	3	0	3	16	7	15	0	3	0	2	1	5	2	11	0	22	1	0	2	0	1	5	2	0	2	0	1	0	8	8	17
ENSG00000215864	ENSG00000215864	NBPF7P	NBPF member 7, pseudogene [Source:HGNC Symbol;Acc:HGNC:31989]	unprocessed_pseudogene	0	6	0	2	0	8	0	0	0	44	0	0	0	0	1	0	0	17	0	17	33	28	2	1	2	26	0	3	6	2	0	7	0	8	1	1	0	2	3	23	0	0	29	8	7
ENSG00000134249	ENSG00000134249	ADAM30	ADAM metallopeptidase domain 30 [Source:HGNC Symbol;Acc:HGNC:208]	protein_coding	1	1	0	3	0	21	0	1	0	0	0	1	0	1	0	0	4	0	3	58	0	8	0	2	1	11	0	3	0	0	6	4	1	0	1	21	17	1	0	0	2	1	0	6	5
ENSG00000092621	ENSG00000092621	PHGDH	phosphoglycerate dehydrogenase [Source:HGNC Symbol;Acc:HGNC:8923]	protein_coding	76	342	92	66	574	180	264	163	74	150	99	345	347	275	406	185	80	682	68	339	416	344	369	279	74	603	159	228	1429	471	276	207	119	250	477	431	367	198	514	1112	3	8	28	60	493
ENSG00000027644	ENSG00000027644	INSRR	insulin receptor related receptor [Source:HGNC Symbol;Acc:HGNC:6093]	protein_coding	4	0	1	10	19	2	6	3	0	1	0	0	1	0	11	0	2	9	1	4	7	16	15	0	5	15	0	2	23	9	5	0	0	0	8	137	10	3	5	51	5	8	77	62	58
ENSG00000241992	ENSG00000241992	RN7SL831P	RNA, 7SL, cytoplasmic 831, pseudogene [Source:HGNC Symbol;Acc:HGNC:46847]	misc_RNA	0	10	0	4	5	21	0	5	5	0	0	0	0	2	10	0	5	14	0	4	0	14	9	4	6	14	9	4	6	0	0	1	0	0	0	1	6	0	0	0	0	0	0	0	2
ENSG00000137970	ENSG00000137970	RPL7P9	ribosomal protein L7 pseudogene 9 [Source:HGNC Symbol;Acc:HGNC:37028]	processed_pseudogene	114	196	58	103	159	136	238	136	45	172	137	342	145	204	97	159	48	181	46	91	225	154	218	149	29	143	102	146	308	194	112	81	56	371	124	146	102	164	97	121	238	289	793	80	116
ENSG00000285698	ENSG00000285698		Novel transcript	lncRNA	0	14	1	1	0	7	0	2	0	14	0	0	0	0	1	1	0	1	3	32	0	1	0	0	1	3	1	15	0	14	1	1	0	0	0	11	0	0	9	0	1	0	0	0	6
ENSG00000228035	ENSG00000228035	NGF-AS1	NGF antisense RNA 1 [Source:HGNC Symbol;Acc:HGNC:53922]	lncRNA	16	28	2	18	115	19	9	1	31	18	35	8	20	3	67	23	55	15	0	16	72	8	20	5	14	5	0	33	280	7	58	0	24	0	160	5	0	0	0	0	0	0	0	13	8
ENSG00000226973	ENSG00000226973		renin (REN) pseudogene	unprocessed_pseudogene	0	0	0	0	0	0	0	0	1	6	0	0	0	0	0	2	0	0	0	0	0	0	0	0	1	0	0	0	0	3	0	1	0	0	2	4	2	0	1	0	0	6	2	9	16
ENSG00000130764	ENSG00000130764	LRRC47	leucine rich repeat containing 47 [Source:HGNC Symbol;Acc:HGNC:29207]	protein_coding	297	647	115	149	533	449	402	203	219	577	458	1091	438	229	259	313	198	593	150	186	609	438	932	409	26	459	408	296	1059	1313	212	242	221	881	763	18	525	916	320	525	772	663	119	61	36
ENSG00000266075	ENSG00000266075	RN7SL574P	RNA, 7SL, cytoplasmic 574, pseudogene [Source:HGNC Symbol;Acc:HGNC:46590]	misc_RNA	0	18	0	7	1	21	0	0	5	54	0	0	1	0	14	1	12	20	0	4	5	19	7	7	4	3	8	3	1	25	24	0	0	0	8	0	48	0	18	23	1	1	8	26	4
ENSG00000272153	ENSG00000272153		novel transcript, antisense to LRRC47	lncRNA	59	134	18	31	81	79	58	30	40	106	69	227	86	36	68	61	44	91	36	26	124	86	162	86	6	72	57	57	212	276	42	66	44	166	147	1	121	148	56	73	132	95	2	25	2
ENSG00000230026	ENSG00000230026		dentatorubral-pallidoluysian atrophy (atrophin-1) (DRPLA) pseudogene	processed_pseudogene	4	7	1	3	0	2	2	4	3	5	0	1	1	0	3	3	3	38	0	9	14	29	4	0	5	4	6	20	4	0	7	0	0	0	78	4	14	1	13	6	2	0	5	17	27
ENSG00000285177	ENSG00000285177		novel transcript, antisense to TBCE	lncRNA	1	1	4	5	21	6	3	2	5	18	0	13	0	1	14	0	6	8	0	2	18	4	11	1	4	0	5	2	4	4	6	0	1	0	30	1	10	4	23	11	3	0	0	0	4
ENSG00000284770	ENSG00000284770	TBCE	tubulin folding cofactor E [Source:HGNC Symbol;Acc:HGNC:11582]	protein_coding	198	659	81	245	692	201	285	277	160	694	276	618	445	495	273	445	139	601	66	301	746	960	573	247	121	431	320	466	677	379	258	162	102	809	34	12	387	282	100	225	17	795	44	300	267
ENSG00000229795	ENSG00000229795	RPS21P1	ribosomal protein S21 pseudogene 1 [Source:HGNC Symbol;Acc:HGNC:36401]	transcribed_processed_pseudogene	0	11	0	0	26	9	3	0	0	0	12	16	9	5	0	7	0	32	0	0	0	3	2	0	0	0	6	2	0	1	0	7	1	23	0	0	16	1	9	0	0	0	0	0	4
ENSG00000238236	ENSG00000238236	MTCYBP14	MT-CYB pseudogene 14 [Source:HGNC Symbol;Acc:HGNC:51960]	processed_pseudogene	0	13	1	23	0	13	0	4	3	0	0	0	8	0	12	1	10	22	0	19	0	30	29	24	12	1	0	14	12	27	2	0	0	0	57	3	0	3	0	1	0	0	0	2	24
ENSG00000235638	ENSG00000235638	MTND6P14	MT-ND6 pseudogene 14 [Source:HGNC Symbol;Acc:HGNC:39477]	processed_pseudogene	0	0	0	0	0	0	0	0	2	0	0	0	0	0	0	0	0	0	0	11	0	0	0	0	1	0	0	0	0	0	8	0	0	0	3	0	0	0	0	0	0	0	0	3	4
ENSG00000227236	ENSG00000227236		solute carrier family 39 (zinc transporter), member 14 pseudogene (SLC39A14)	processed_pseudogene	0	0	0	0	0	0	0	3	0	20	0	0	0	3	4	0	0	0	0	6	0	53	2	0	2	3	4	10	0	0	2	1	0	0	0	8	0	0	0	3	0	1	0	14	7
ENSG00000198837	ENSG00000198837	DENND4B	DENN domain containing 4B [Source:HGNC Symbol;Acc:HGNC:29044]	protein_coding	188	246	61	52	369	212	180	94	133	285	103	416	281	289	91	470	92	442	41	140	72	166	244	282	9	316	184	380	284	499	212	188	98	391	21	353	154	30	30	241	9	319	57	129	58
ENSG00000160741	ENSG00000160741	CRTC2	CREB regulated transcription coactivator 2 [Source:HGNC Symbol;Acc:HGNC:27301]	protein_coding	205	273	36	42	316	181	354	96	96	290	138	361	163	203	83	235	62	253	34	108	160	103	285	153	26	273	147	167	434	407	106	140	138	330	108	1092	571	7	331	323	0	390	3	24	95
ENSG00000282386	ENSG00000282386		novel transcript, antisense to SLC39A1	lncRNA	1	3	5	5	0	13	0	6	5	1	16	4	11	6	0	0	1	0	0	2	14	4	23	0	2	12	7	9	0	1	0	0	0	0	0	1	0	4	0	0	0	0	17	38	2
ENSG00000273026	ENSG00000273026		novel transcript, antisense to SLC39A1	lncRNA	0	0	0	2	0	5	0	0	0	19	9	0	0	7	0	0	0	0	0	7	0	14	0	6	1	0	0	7	2	17	0	3	0	22	28	0	0	0	0	0	0	0	0	0	4
ENSG00000143578	ENSG00000143578	CREB3L4	cAMP responsive element binding protein 3 like 4 [Source:HGNC Symbol;Acc:HGNC:18854]	protein_coding	75	90	29	25	9	47	99	40	27	57	95	164	47	58	8	25	48	102	12	34	151	67	71	52	9	78	59	83	94	112	49	36	26	144	57	19	45	39	28	6	100	56	27	28	96
ENSG00000143543	ENSG00000143543	JTB	jumping translocation breakpoint [Source:HGNC Symbol;Acc:HGNC:6201]	protein_coding	2173	4071	707	1072	2690	2334	3662	1988	1056	3646	1606	5300	2595	2536	935	2100	926	2978	602	1340	2582	3439	3140	2782	300	3102	1717	3084	3474	3809	1366	1471	916	7336	1660	2939	3898	3188	2145	4356	4500	5299	9402	2778	2019
ENSG00000285641	ENSG00000285641		novel protein	protein_coding	3615	11893	1512	2905	6288	5245	6838	5700	2343	11868	3946	10217	5220	5312	3075	7916	1931	6120	1316	3338	7673	11218	7505	5795	969	6922	4143	6443	8732	7863	3181	3406	1936	16125	2724	4171	6983	5644	4067	7986	5692	7012	13391	3114	3541
ENSG00000143545	ENSG00000143545	RAB13	RAB13, member RAS oncogene family [Source:HGNC Symbol;Acc:HGNC:9762]	protein_coding	1595	8234	858	1922	3808	3104	3375	3972	1368	8722	2502	5370	2808	2955	2236	6097	1086	3394	767	2140	5332	8110	4667	3195	704	4120	2571	3559	5537	4305	1896	2080	1083	9268	1381	1755	3760	3129	2305	4352	2119	2740	6391	1057	2029
ENSG00000177954	ENSG00000177954	RPS27	ribosomal protein S27 [Source:HGNC Symbol;Acc:HGNC:10416]	protein_coding	1538	2108	715	1210	3815	2274	2570	1284	705	2218	1816	9070	1385	2473	946	2556	710	2797	727	970	2548	2450	2506	1824	290	2175	915	1598	2935	2752	1186	1143	806	5825	3238	7238	4166	6723	3570	8291	7835	10157	20108	6916	3493
ENSG00000200220	ENSG00000200220	RNU6-179P	RNA, U6 small nuclear 179, pseudogene [Source:HGNC Symbol;Acc:HGNC:47142]	snRNA	0	0	0	5	10	9	4	0	0	7	0	0	0	0	8	0	4	8	0	3	0	0	0	3	1	4	4	8	0	13	2	0	0	3	0	0	2	25	6	0	0	0	10	2	0
ENSG00000231837	ENSG00000231837	RPS7P2	ribosomal protein S7 pseudogene 2 [Source:HGNC Symbol;Acc:HGNC:36079]	processed_pseudogene	0	5	0	0	7	15	0	1	3	2	0	0	0	0	9	0	2	0	0	2	0	1	0	4	5	20	3	16	0	1	0	2	0	0	0	0	0	0	0	0	0	1	0	0	3
ENSG00000162642	ENSG00000162642	C1orf52	chromosome 1 open reading frame 52 [Source:HGNC Symbol;Acc:HGNC:24871]	protein_coding	227	431	87	160	349	213	594	210	104	314	138	504	347	253	115	229	78	356	122	219	517	212	302	224	58	345	212	259	561	336	175	135	100	540	173	163	288	86	208	134	296	484	34	26	105
ENSG00000223254	ENSG00000223254	Y_RNA	Y RNA [Source:RFAM;Acc:RF00019]	misc_RNA	7	1	0	0	4	14	10	6	3	7	0	3	0	0	0	0	0	4	1	4	1	5	4	2	5	6	0	1	0	1	13	0	1	1	0	0	0	0	0	1	0	0	62	0	0
ENSG00000223653	ENSG00000223653	BCL10-AS1	BCL10 antisense RNA 1 [Source:HGNC Symbol;Acc:HGNC:55868]	lncRNA	104	114	9	36	150	95	170	68	42	113	74	140	80	65	69	113	50	116	14	81	60	182	140	92	13	137	81	100	84	83	86	57	27	152	69	96	126	90	58	70	136	184	0	65	19
ENSG00000116198	ENSG00000116198	CEP104	centrosomal protein 104 [Source:HGNC Symbol;Acc:HGNC:24866]	protein_coding	166	486	76	109	291	442	310	164	229	506	160	736	368	230	188	415	192	460	87	219	152	447	268	329	88	500	266	423	879	446	158	90	44	554	451	21	490	39	460	251	5	822	121	174	317
ENSG00000169598	ENSG00000169598	DFFB	DNA fragmentation factor subunit beta [Source:HGNC Symbol;Acc:HGNC:2773]	protein_coding	60	168	22	68	159	108	57	88	58	187	37	123	69	32	33	153	14	273	23	73	191	133	195	60	34	120	127	66	17	201	45	33	8	254	12	9	56	584	223	1	2	35	37	91	45
ENSG00000288626	ENSG00000288626		novel protein	protein_coding	4	10	0	0	18	9	8	2	4	5	2	5	0	0	6	17	1	9	0	7	0	17	2	2	0	5	2	7	12	8	0	4	2	0	28	0	0	1	0	0	0	0	0	0	4
ENSG00000162836	ENSG00000162836	ACP6	acid phosphatase 6, lysophosphatidic [Source:HGNC Symbol;Acc:HGNC:29609]	protein_coding	124	105	18	37	75	98	269	76	60	261	222	161	136	84	81	145	69	201	30	132	70	121	183	180	25	134	143	147	290	213	64	59	28	180	86	454	220	17	61	158	1	41	76	40	56
ENSG00000244568	ENSG00000244568	RN7SL654P	RNA, 7SL, cytoplasmic 654, pseudogene [Source:HGNC Symbol;Acc:HGNC:46670]	misc_RNA	0	0	1	0	1	9	0	0	0	6	0	0	0	0	0	0	0	0	0	7	0	0	7	0	4	10	0	1	0	40	0	0	0	3	0	0	0	1	11	0	0	0	0	1	0
ENSG00000116667	ENSG00000116667	C1orf21	chromosome 1 open reading frame 21 [Source:HGNC Symbol;Acc:HGNC:15494]	protein_coding	492	355	266	98	1456	104	1312	173	274	207	769	1529	971	416	659	100	465	228	377	78	1215	509	1710	263	148	287	313	145	2487	395	664	86	485	620	150	456	405	310	1000	181	632	0	159	85	326
ENSG00000230470	ENSG00000230470		novel transcript	lncRNA	0	0	0	2	1	0	0	1	4	0	0	0	1	0	1	0	0	25	0	7	0	10	1	1	2	9	0	2	0	1	3	0	0	0	38	3	0	0	0	0	0	0	1	0	0
ENSG00000232036	ENSG00000232036		novel pseudogene	processed_pseudogene	0	2	0	0	1	1	0	0	0	0	0	0	0	0	1	28	0	10	0	0	0	2	1	0	2	0	0	3	0	1	0	0	0	1	2	1	0	0	0	0	0	0	0	40	6
ENSG00000285847	ENSG00000285847		novel transcript	lncRNA	2	27	0	17	34	48	8	4	1	20	6	1	5	2	17	1	0	12	0	87	20	76	3	18	1	22	2	49	46	111	18	6	0	29	2	32	11	3	29	37	6	2	13	68	43
ENSG00000286378	ENSG00000286378		novel transcript	lncRNA	5	25	0	10	0	2	6	0	9	0	6	0	0	0	11	0	0	3	0	8	0	131	5	7	5	12	1	9	0	14	1	0	0	6	3	9	0	0	0	0	1	0	13	12	14
ENSG00000261326	ENSG00000261326	LINC01355	long intergenic non-protein coding RNA 1355 [Source:HGNC Symbol;Acc:HGNC:50584]	lncRNA	2	22	3	1	10	12	0	4	4	8	0	12	0	0	16	1	7	0	0	40	31	13	12	1	10	4	17	32	12	11	6	2	0	3	1	11	1	2	7	0	0	0	0	5	6
ENSG00000284726	ENSG00000284726		novel transcript	lncRNA	2	4	0	8	1	1	0	0	15	2	0	12	0	0	2	1	0	0	1	4	3	3	2	2	8	3	0	5	3	0	2	0	0	6	27	1	0	0	3	7	1	0	0	0	4
ENSG00000125945	ENSG00000125945	ZNF436	zinc finger protein 436 [Source:HGNC Symbol;Acc:HGNC:20814]	protein_coding	227	384	70	73	1260	114	406	144	58	390	268	432	222	146	180	231	126	210	87	94	194	286	582	149	51	265	180	169	1213	506	183	0	137	175	2	6	178	5	0	225	9	1	17	31	485
ENSG00000271420	ENSG00000271420		novel transcript	lncRNA	5	8	6	10	29	6	9	0	10	3	0	0	18	2	35	0	13	21	1	22	1	52	16	0	9	8	2	5	9	21	13	6	1	3	64	5	7	1	24	11	0	0	67	25	6
ENSG00000204219	ENSG00000204219	TCEA3	transcription elongation factor A3 [Source:HGNC Symbol;Acc:HGNC:11615]	protein_coding	32	31	69	16	715	4	216	21	43	24	38	46	166	30	72	38	47	38	44	54	325	36	255	30	37	76	25	28	613	69	110	7	61	46	446	3	133	14	117	30	0	13	72	6	29
ENSG00000232482	ENSG00000232482		single-stranded DNA binding protein (SSBP1) pseudogene	processed_pseudogene	1	4	0	2	7	0	4	1	0	3	0	0	3	0	10	0	5	13	0	7	7	59	7	6	8	0	3	5	1	31	0	1	0	1	24	0	24	0	0	0	0	0	0	0	13
ENSG00000285779	ENSG00000285779		novel protein	protein_coding	1724	3100	626	816	2750	1706	2938	1456	908	2855	1337	3874	2521	2070	912	1544	877	2293	522	952	2335	2618	2752	2110	246	2190	1356	2191	3669	3072	1272	1183	795	5743	1315	3325	3115	1729	2110	3147	4280	4214	8183	1348	1293
ENSG00000162885	ENSG00000162885	B3GALNT2	beta-1,3-N-acetylgalactosaminyltransferase 2 [Source:HGNC Symbol;Acc:HGNC:28596]	protein_coding	142	517	81	200	530	174	216	229	129	672	123	519	342	320	342	377	90	486	95	279	551	846	411	228	81	334	289	386	608	455	333	126	96	843	75	23	231	99	111	305	6	733	61	603	161
ENSG00000270780	ENSG00000270780		ribosomal protein L13a (RPL13A) pseudogene	processed_pseudogene	0	3	0	0	4	3	0	0	1	4	0	1	0	1	0	0	0	0	1	4	0	8	0	0	1	0	2	2	1	1	2	0	0	0	4	3	0	5	1	4	0	1	8	1	0
ENSG00000273112	ENSG00000273112		novel transcript, readthrough between FCGR2A and FCGR2C polymormphic pseudogene	lncRNA	905	478	289	172	976	707	1626	307	364	524	676	807	1001	746	414	879	398	901	267	399	375	530	1048	633	85	997	548	379	863	977	605	518	310	1850	275	764	821	491	402	835	798	678	1238	684	306
ENSG00000173110	ENSG00000173110	HSPA6	heat shock protein family A (Hsp70) member 6 [Source:HGNC Symbol;Acc:HGNC:5239]	protein_coding	1689	610	121	159	206	227	741	333	408	449	685	829	561	3644	86	179	309	564	525	591	293	604	624	757	69	658	448	597	543	807	362	155	286	599	218	615	1300	538	422	1645	403	2256	0	6	203
ENSG00000224203	ENSG00000224203	RPS23P10	ribosomal protein S23 pseudogene 10 [Source:HGNC Symbol;Acc:HGNC:48342]	unprocessed_pseudogene	0	12	2	9	14	21	3	13	0	2	0	0	12	0	1	0	3	4	1	19	11	15	2	12	4	16	8	32	15	1	6	3	0	7	2	1	0	0	17	7	0	0	0	0	0
ENSG00000225217	ENSG00000225217	HSPA7	heat shock protein family A (Hsp70) member 7 (pseudogene) [Source:HGNC Symbol;Acc:HGNC:5240]	unprocessed_pseudogene	128	33	4	8	1	6	20	10	0	5	3	13	3	268	20	2	0	5	6	5	0	3	3	26	0	11	0	1	35	22	4	1	1	1	12	4	56	4	6	17	15	1	68	8	28
ENSG00000231586	ENSG00000231586	RPS23P9	ribosomal protein S23 pseudogene 9 [Source:HGNC Symbol;Acc:HGNC:48341]	unprocessed_pseudogene	0	1	2	7	0	7	0	0	0	0	0	0	0	1	13	4	0	12	3	7	0	0	0	2	3	7	3	8	0	29	3	1	0	2	55	0	2	0	2	0	0	0	0	0	1
ENSG00000234211	ENSG00000234211		novel transcript, antisense to FCGR2B	lncRNA	28	21	12	6	33	8	65	5	7	26	19	43	42	22	5	10	8	23	11	6	44	7	28	14	5	9	18	5	29	12	26	6	11	33	33	7	41	84	12	2	67	1	132	279	28
ENSG00000213075	ENSG00000213075	RPL31P11	ribosomal protein L31 pseudogene 11 [Source:HGNC Symbol;Acc:HGNC:35849]	transcribed_processed_pseudogene	0	19	0	2	1	11	5	3	4	10	0	0	0	3	4	0	1	26	0	20	8	30	1	2	14	3	8	10	0	31	0	0	0	2	0	5	0	0	9	0	0	2	0	0	2
ENSG00000143125	ENSG00000143125	PROK1	prokineticin 1 [Source:HGNC Symbol;Acc:HGNC:18454]	protein_coding	0	0	7	4	3	3	8	1	7	0	2	0	0	0	0	5	0	0	0	3	1	0	41	2	0	0	0	3	15	9	4	0	0	0	8	5	49	2	0	2	0	0	3	2	7
ENSG00000283999	ENSG00000283999		novel transcript	lncRNA	0	5	6	6	1	3	0	6	0	5	0	1	4	0	1	3	1	1	0	1	2	7	12	0	0	2	0	2	3	8	0	1	0	0	1	0	1	1	5	1	8	4	4	23	4
ENSG00000240194	ENSG00000240194	CYMP	chymosin, pseudogene [Source:HGNC Symbol;Acc:HGNC:2588]	transcribed_unitary_pseudogene	0	5	6	4	6	3	0	6	0	11	0	0	4	1	12	2	1	13	0	3	2	10	14	0	0	2	0	2	3	14	1	4	0	1	4	7	4	1	5	1	3	4	4	27	2
ENSG00000235407	ENSG00000235407	CYMP-AS1	CYMP antisense RNA 1 [Source:HGNC Symbol;Acc:HGNC:52509]	lncRNA	1	1	6	1	0	0	0	0	0	0	0	3	0	0	0	0	0	2	0	1	0	1	0	0	0	2	0	0	0	0	0	1	0	0	0	0	3	2	3	1	0	8	1	22	10
ENSG00000143105	ENSG00000143105	KCNA10	potassium voltage-gated channel subfamily A member 10 [Source:HGNC Symbol;Acc:HGNC:6219]	protein_coding	1	0	0	0	14	0	0	0	0	0	0	0	0	0	0	0	0	0	0	2	0	1	19	0	0	0	0	4	0	0	0	1	0	0	0	1	0	0	0	0	0	0	0	13	11
ENSG00000199710	ENSG00000199710	Y_RNA	Y RNA [Source:RFAM;Acc:RF00019]	misc_RNA	1	0	0	0	26	11	2	2	0	4	1	3	0	0	3	6	0	0	0	6	0	5	2	3	2	1	0	0	0	1	1	0	2	2	1	0	9	11	8	0	0	0	0	14	1
ENSG00000237415	ENSG00000237415	NRBF2P3	nuclear receptor binding factor 2 pseudogene 3 [Source:HGNC Symbol;Acc:HGNC:44606]	processed_pseudogene	3	9	5	2	0	1	4	2	16	5	0	3	0	1	13	4	4	14	0	11	2	15	2	2	3	7	4	8	8	18	1	0	3	0	0	0	3	2	17	0	1	0	9	2	2
ENSG00000177301	ENSG00000177301	KCNA2	potassium voltage-gated channel subfamily A member 2 [Source:HGNC Symbol;Acc:HGNC:6220]	protein_coding	3	39	7	10	21	6	14	10	6	53	0	0	0	1	6	35	2	21	3	24	1	65	38	15	4	64	8	14	18	38	14	10	19	4	67	14	27	16	38	22	9	8	188	269	87
ENSG00000226828	ENSG00000226828	LINC02774	long intergenic non-protein coding RNA 2774 [Source:HGNC Symbol;Acc:HGNC:27923]	lncRNA	0	0	1	7	0	4	0	1	0	0	0	8	0	0	2	0	0	8	0	12	32	29	0	1	0	3	1	2	2	17	0	0	0	3	55	5	4	1	3	26	0	0	8	11	22
ENSG00000279774	ENSG00000279774		novel transcript	TEC	0	8	4	3	2	5	1	1	7	12	0	0	0	0	16	0	0	32	1	22	0	16	2	0	10	9	4	4	8	11	10	3	0	0	27	4	2	0	14	3	0	0	0	20	9
ENSG00000229960	ENSG00000229960		novel transcript	lncRNA	0	13	1	7	0	13	0	4	6	41	0	0	3	0	4	1	7	12	0	14	0	38	2	0	5	7	5	26	0	18	2	0	2	1	25	2	0	1	12	1	0	0	0	0	25
ENSG00000286486	ENSG00000286486		novel transcript	lncRNA	0	15	0	3	0	4	0	0	0	0	0	0	0	3	28	0	0	3	0	5	5	127	0	9	0	8	0	25	0	1	4	1	0	0	1	1	0	0	5	1	1	0	0	21	17
ENSG00000237759	ENSG00000237759		novel transcript	lncRNA	0	0	0	0	0	18	0	0	2	13	0	5	0	0	7	0	0	12	0	5	0	1	0	1	15	1	2	2	0	21	2	0	0	0	0	0	0	0	5	0	0	0	0	19	3
ENSG00000287531	ENSG00000287531		novel transcript	lncRNA	4	5	1	2	0	5	0	2	0	2	0	3	0	0	15	2	6	3	0	6	1	4	0	1	1	7	1	0	3	15	0	0	0	1	12	0	0	0	18	9	0	0	0	0	2
ENSG00000225855	ENSG00000225855	RUSC1-AS1	RUSC1 antisense RNA 1 [Source:HGNC Symbol;Acc:HGNC:26680]	lncRNA	795	2186	296	492	1574	1021	1490	802	409	1697	697	2567	1247	1539	466	1244	305	1557	254	714	1702	1675	1573	1740	166	1629	1061	1504	1975	1746	550	765	468	2862	942	1007	1068	1591	1186	1982	4299	4089	13817	1606	690
ENSG00000283701	ENSG00000283701	MIR555	microRNA 555 [Source:HGNC Symbol;Acc:HGNC:32811]	miRNA	1	2	2	15	2	11	3	2	4	31	0	30	0	3	0	24	0	3	0	20	7	21	3	9	1	13	10	14	2	6	6	0	3	7	28	0	0	0	12	0	0	8	0	0	0
ENSG00000227773	ENSG00000227773	ASH1L-IT1	ASH1L intronic transcript 1 [Source:HGNC Symbol;Acc:HGNC:41449]	lncRNA	3	4	0	0	1	12	2	2	6	14	0	4	8	1	1	0	4	2	0	1	3	12	0	0	11	16	2	2	7	1	5	1	1	0	10	20	3	2	7	0	0	0	0	2	4
ENSG00000237872	ENSG00000237872	POU5F1P4	POU class 5 homeobox 1 pseudogene 4 [Source:HGNC Symbol;Acc:HGNC:33310]	processed_pseudogene	0	1	0	0	1	8	3	0	0	0	0	1	0	0	0	0	0	6	3	0	5	1	2	1	0	6	0	1	0	0	0	0	0	0	4	6	5	0	1	0	0	0	26	12	7
ENSG00000225082	ENSG00000225082	DAP3P1	death associated protein 3 pseudogene 1 [Source:HGNC Symbol;Acc:HGNC:17624]	unprocessed_pseudogene	1	8	0	4	7	7	2	12	7	2	0	0	0	3	2	1	2	7	4	11	5	33	2	7	12	0	11	14	7	9	7	0	0	6	0	3	1	0	9	8	0	0	0	0	1
ENSG00000232519	ENSG00000232519		novel transcript, antisense to MSTO1	lncRNA	1	14	0	0	5	5	1	5	2	1	0	8	2	4	0	3	1	5	0	2	0	10	3	6	0	9	3	11	12	13	5	2	0	12	2	0	0	17	1	6	0	11	0	37	0
ENSG00000160752	ENSG00000160752	FDPS	farnesyl diphosphate synthase [Source:HGNC Symbol;Acc:HGNC:3631]	protein_coding	928	2569	345	606	1781	1173	1753	961	492	1987	796	2963	1478	1795	560	1506	368	1824	308	810	2055	2015	1850	2029	199	1989	1277	1801	2319	2086	659	924	552	3368	1108	1249	1283	1933	1403	2377	5350	5074	17039	1997	888
ENSG00000121957	ENSG00000121957	GPSM2	G protein signaling modulator 2 [Source:HGNC Symbol;Acc:HGNC:29501]	protein_coding	328	672	104	202	528	456	720	415	309	989	389	722	615	842	245	270	185	891	244	368	480	384	997	663	165	1510	1036	1018	1502	975	341	175	127	419	500	48	615	391	581	284	3	915	10	90	76
ENSG00000223026	ENSG00000223026	RN7SKP247	RN7SK pseudogene 247 [Source:HGNC Symbol;Acc:HGNC:45971]	misc_RNA	0	2	0	6	6	1	1	1	4	0	0	0	0	3	4	0	4	7	0	0	0	5	3	0	3	1	1	6	2	0	0	0	0	2	0	2	0	0	1	0	0	0	0	8	1
ENSG00000225721	ENSG00000225721		novel transcript	lncRNA	313	756	165	256	643	540	578	370	142	682	325	1238	370	693	240	476	136	708	108	242	577	658	611	701	49	742	268	491	702	738	233	262	184	1347	296	578	293	768	378	704	537	711	1522	134	186
ENSG00000188396	ENSG00000188396	DYNLT4	dynein light chain Tctex-type 4 [Source:HGNC Symbol;Acc:HGNC:32315]	protein_coding	111	67	34	11	106	31	180	33	31	42	27	158	135	49	70	45	29	61	24	10	63	53	71	44	4	39	30	46	153	89	83	86	41	336	125	93	115	27	46	43	62	60	89	6	67
ENSG00000223779	ENSG00000223779		novel pseudogene, similar to phosphodiesterase 4D interacting protein PDE4DIP	unprocessed_pseudogene	0	10	0	0	13	7	2	1	5	41	0	4	0	0	1	0	6	5	0	15	8	58	0	10	1	11	4	26	0	7	0	5	1	4	4	4	12	3	1	0	0	4	17	0	2
ENSG00000233430	ENSG00000233430	PDE4DIPP3	PDE4DIP pseudogene 3 [Source:HGNC Symbol;Acc:HGNC:55082]	unprocessed_pseudogene	0	0	2	16	6	10	0	0	0	14	1	3	8	3	0	0	0	0	0	1	13	9	0	1	0	0	8	7	5	2	1	0	1	0	0	0	0	0	0	0	0	0	0	0	0
ENSG00000265531	ENSG00000265531	FCGR1CP	Fc gamma receptor Ic, pseudogene [Source:HGNC Symbol;Acc:HGNC:3615]	unprocessed_pseudogene	5	20	7	4	2	19	7	5	1	4	36	60	28	36	2	1	0	52	1	32	0	65	17	38	0	1	31	33	4	29	1	48	0	89	2	0	0	17	2	101	0	0	33	0	3
ENSG00000234571	ENSG00000234571	H2BP2	H2B histone pseudogene 2 [Source:HGNC Symbol;Acc:HGNC:20654]	transcribed_unprocessed_pseudogene	5	4	0	20	3	0	3	6	0	5	5	14	8	6	1	16	1	10	0	18	0	35	32	9	0	4	12	17	0	5	1	5	3	10	30	1	0	9	20	9	0	0	0	32	18
ENSG00000082482	ENSG00000082482	KCNK2	potassium two pore domain channel subfamily K member 2 [Source:HGNC Symbol;Acc:HGNC:6277]	protein_coding	37	4	14	1	21	0	59	0	0	12	0	1	114	0	25	0	8	3	0	16	58	6	223	0	0	0	15	0	149	0	0	0	22	1	0	3	0	0	22	0	0	0	12	8	136
ENSG00000116747	ENSG00000116747	RO60	Ro60, Y RNA binding protein [Source:HGNC Symbol;Acc:HGNC:11313]	protein_coding	810	2065	341	453	2826	1513	1113	971	686	1557	1087	3665	1736	1320	1032	1435	505	2422	429	787	1065	1556	2123	1501	214	2205	1094	1361	2523	3244	947	812	417	1922	1275	2080	768	604	1168	951	1667	990	3504	1036	671
ENSG00000118729	ENSG00000118729	CASQ2	calsequestrin 2 [Source:HGNC Symbol;Acc:HGNC:1513]	protein_coding	0	5	2	23	27	21	1	8	5	64	0	1	0	1	12	2	6	6	1	55	0	2	8	4	2	46	5	20	7	82	9	4	4	5	126	9	3	5	3	0	2	3	45	39	27
ENSG00000134207	ENSG00000134207	SYT6	synaptotagmin 6 [Source:HGNC Symbol;Acc:HGNC:18638]	protein_coding	5	11	0	4	4	0	0	0	1	1	0	4	1	7	0	2	0	0	0	34	1	3	2	4	0	2	0	25	0	0	1	2	11	1	14	13	4	5	0	13	0	1	67	42	39
ENSG00000163467	ENSG00000163467	TSACC	TSSK6 activating cochaperone [Source:HGNC Symbol;Acc:HGNC:30636]	protein_coding	1	9	2	11	4	48	7	5	11	5	1	9	0	6	11	7	2	30	0	11	0	34	3	26	11	11	3	8	11	52	8	4	0	3	9	0	25	0	11	13	0	0	0	19	4
ENSG00000243710	ENSG00000243710	CFAP57	cilia and flagella associated protein 57 [Source:HGNC Symbol;Acc:HGNC:26485]	protein_coding	1	60	3	24	69	61	10	11	22	99	0	5	6	18	26	14	31	43	1	82	39	104	37	17	42	35	19	30	38	121	28	3	3	64	34	22	42	11	90	5	5	4	6	62	71
ENSG00000117395	ENSG00000117395	EBNA1BP2	EBNA1 binding protein 2 [Source:HGNC Symbol;Acc:HGNC:15531]	protein_coding	276	1178	144	321	837	686	418	406	181	728	324	1357	418	749	346	613	139	1441	102	465	579	1067	810	1136	79	948	296	797	1006	1176	298	410	247	2015	901	1004	180	1323	536	2289	2260	1963	3755	77	570
ENSG00000116874	ENSG00000116874	WARS2	tryptophanyl tRNA synthetase 2, mitochondrial [Source:HGNC Symbol;Acc:HGNC:12730]	protein_coding	176	282	28	89	382	152	217	192	80	98	284	488	403	220	251	241	21	414	24	204	445	240	542	145	23	305	92	104	664	257	49	104	21	255	512	0	131	0	224	340	84	499	0	156	14
ENSG00000065600	ENSG00000065600	PACC1	proton activated chloride channel 1 [Source:HGNC Symbol;Acc:HGNC:25593]	protein_coding	18	79	3	19	101	27	21	81	8	87	15	41	50	139	30	83	30	54	10	87	5	112	3	38	6	34	28	44	175	185	21	46	13	167	3	6	39	0	2	91	3	0	0	18	12
ENSG00000009780	ENSG00000009780	FAM76A	family with sequence similarity 76 member A [Source:HGNC Symbol;Acc:HGNC:28530]	protein_coding	66	201	23	47	233	79	71	80	80	195	57	92	120	79	96	3	46	156	57	85	208	151	173	64	27	144	80	147	391	95	84	51	38	210	278	83	72	70	253	221	414	72	10	56	62
ENSG00000023572	ENSG00000023572	GLRX2	glutaredoxin 2 [Source:HGNC Symbol;Acc:HGNC:16065]	protein_coding	152	337	46	66	458	302	241	215	86	276	185	490	248	246	92	300	54	404	68	160	171	316	512	237	39	371	156	286	443	340	178	128	65	442	291	510	333	134	150	210	202	1104	918	321	265
ENSG00000077254	ENSG00000077254	USP33	ubiquitin specific peptidase 33 [Source:HGNC Symbol;Acc:HGNC:20059]	protein_coding	823	1180	302	245	1403	1009	1212	895	625	1151	603	1686	1112	1025	798	1324	484	1109	428	709	1277	1452	1456	936	168	1387	810	952	1870	1456	429	535	239	1250	953	4	982	1911	1813	520	5	1860	0	9	122
ENSG00000134644	ENSG00000134644	PUM1	pumilio RNA binding family member 1 [Source:HGNC Symbol;Acc:HGNC:14957]	protein_coding	844	2656	474	568	3008	1442	1411	914	858	2791	1202	5074	1805	1334	524	1721	619	3020	435	1192	2609	1687	2243	1566	321	2914	1103	1731	3702	2768	959	916	556	2487	1484	1165	1675	890	1911	2453	1988	3128	16	52	52
ENSG00000215788	ENSG00000215788	TNFRSF25	TNF receptor superfamily member 25 [Source:HGNC Symbol;Acc:HGNC:11910]	protein_coding	7	17	5	14	11	7	10	8	7	1	0	145	0	6	13	62	3	11	10	19	14	13	11	15	2	2	12	22	21	68	11	8	13	64	1	37	13	5	9	5	8	0	6	23	74
ENSG00000117834	ENSG00000117834	SLC5A9	solute carrier family 5 member 9 [Source:HGNC Symbol;Acc:HGNC:22146]	protein_coding	186	41	47	37	111	101	87	22	80	146	74	88	29	30	85	297	69	156	47	103	0	123	275	126	5	128	49	105	72	133	110	92	42	185	28	645	363	3	2	84	865	0	3597	109	272
ENSG00000117625	ENSG00000117625	RCOR3	REST corepressor 3 [Source:HGNC Symbol;Acc:HGNC:25594]	protein_coding	736	677	146	310	1223	499	873	563	501	835	741	1045	667	527	306	339	245	693	215	329	497	584	1299	987	124	819	398	720	1434	869	461	233	203	1368	537	724	202	528	949	215	2013	173	10	634	458
ENSG00000179902	ENSG00000179902	CFAP276	cilia and flagella associated protein 276 [Source:HGNC Symbol;Acc:HGNC:32331]	protein_coding	0	0	0	2	4	0	1	1	0	0	0	0	0	0	4	1	5	3	0	6	2	39	3	0	1	3	6	5	0	0	0	3	0	0	9	2	1	0	1	7	6	3	45	2	7
ENSG00000020633	ENSG00000020633	RUNX3	RUNX family transcription factor 3 [Source:HGNC Symbol;Acc:HGNC:10473]	protein_coding	43	104	39	74	528	222	121	72	49	216	498	3271	187	390	73	232	84	340	55	208	279	192	143	182	33	301	193	301	228	1227	156	261	44	782	154	459	110	405	174	280	182	39	9	66	80
ENSG00000121766	ENSG00000121766	ZCCHC17	zinc finger CCHC-type containing 17 [Source:HGNC Symbol;Acc:HGNC:30246]	protein_coding	457	1393	242	288	880	806	880	696	464	1500	480	2099	571	1201	327	678	192	909	299	386	969	1104	1127	1088	173	1460	987	1312	1192	1257	411	417	297	1792	711	1071	520	801	1428	1760	1161	3249	4482	2	277
ENSG00000143157	ENSG00000143157	POGK	pogo transposable element derived with KRAB domain [Source:HGNC Symbol;Acc:HGNC:18800]	protein_coding	339	1055	248	451	869	841	544	466	326	849	674	999	858	489	233	1649	85	741	165	557	984	963	881	411	120	700	769	841	1051	1134	466	454	237	1219	36	29	1167	15	256	225	5	1234	135	36	379
ENSG00000162614	ENSG00000162614	NEXN	nexilin F-actin binding protein [Source:HGNC Symbol;Acc:HGNC:29557]	protein_coding	82	51	74	48	299	178	114	74	61	230	115	158	161	102	82	103	58	101	52	147	220	161	411	240	53	196	79	82	461	272	67	58	86	144	59	543	198	207	544	178	1454	1	5	41	96
ENSG00000160781	ENSG00000160781	PAQR6	progestin and adipoQ receptor family member 6 [Source:HGNC Symbol;Acc:HGNC:30132]	protein_coding	9	3	1	0	16	0	4	2	0	33	0	2	36	3	0	7	13	15	4	0	48	5	30	9	1	11	13	6	49	1	25	1	1	17	6	9	5	4	4	1	13	6	36	19	30
ENSG00000143344	ENSG00000143344	RGL1	ral guanine nucleotide dissociation stimulator like 1 [Source:HGNC Symbol;Acc:HGNC:30281]	protein_coding	925	2182	863	311	2342	986	1509	1052	672	1403	1509	1238	827	726	830	1183	275	1822	735	1223	3877	3232	3112	629	127	483	568	578	2197	2009	621	902	645	2369	1218	15	693	608	737	2828	2	747	17	18	273
ENSG00000162613	ENSG00000162613	FUBP1	far upstream element binding protein 1 [Source:HGNC Symbol;Acc:HGNC:4004]	protein_coding	222	869	142	224	669	452	327	370	255	1190	398	1692	370	627	209	759	152	831	123	454	256	566	619	618	73	1048	550	645	350	980	341	429	88	923	655	715	137	353	426	451	807	361	41	42	214
ENSG00000116882	ENSG00000116882	HAO2	hydroxyacid oxidase 2 [Source:HGNC Symbol;Acc:HGNC:4810]	protein_coding	0	0	19	8	4	1	6	7	7	1	0	70	0	77	2	0	0	2	0	4	63	0	0	0	2	33	1	1	0	0	1	1	0	1	0	6	5	0	2	0	4	0	0	14	11
ENSG00000198758	ENSG00000198758	EPS8L3	EPS8 like 3 [Source:HGNC Symbol;Acc:HGNC:21297]	protein_coding	1	12	0	2	9	0	0	0	0	0	0	9	0	6	0	0	1	2	0	1	3	6	3	2	0	0	2	2	7	0	0	1	0	1	3	11	3	3	7	4	5	6	128	56	37
ENSG00000117569	ENSG00000117569	PTBP2	polypyrimidine tract binding protein 2 [Source:HGNC Symbol;Acc:HGNC:17662]	protein_coding	79	183	24	61	85	128	106	93	99	206	44	110	26	170	60	106	3	115	8	116	70	108	289	220	29	91	69	266	302	82	76	63	42	180	10	17	25	602	106	0	3	22	71	79	15
ENSG00000142856	ENSG00000142856	ITGB3BP	integrin subunit beta 3 binding protein [Source:HGNC Symbol;Acc:HGNC:6157]	protein_coding	327	452	88	123	541	301	418	272	193	830	258	602	279	477	155	234	148	499	130	167	435	400	580	613	99	594	349	484	574	796	249	178	227	928	259	397	256	535	301	295	214	810	1678	39	415
ENSG00000158022	ENSG00000158022	TRIM63	tripartite motif containing 63 [Source:HGNC Symbol;Acc:HGNC:16007]	protein_coding	0	16	1	15	58	43	0	2	12	58	10	7	23	0	10	3	3	58	2	33	13	66	1	36	5	36	6	27	26	85	7	5	0	13	13	5	0	2	2	22	0	7	0	36	28
ENSG00000116396	ENSG00000116396	KCNC4	potassium voltage-gated channel subfamily C member 4 [Source:HGNC Symbol;Acc:HGNC:6236]	protein_coding	48	62	9	31	83	55	56	36	24	180	8	44	43	23	54	54	18	89	20	87	67	79	125	34	15	48	33	90	123	65	38	27	35	112	61	68	63	23	48	11	13	0	183	219	136
ENSG00000058668	ENSG00000058668	ATP2B4	ATPase plasma membrane Ca2+ transporting 4 [Source:HGNC Symbol;Acc:HGNC:817]	protein_coding	84	140	32	107	287	178	43	89	122	279	148	522	30	105	69	347	183	381	41	176	236	488	301	439	55	356	94	226	289	391	110	137	62	457	173	99	72	4	78	91	8	1	21	73	49
ENSG00000163875	ENSG00000163875	MEAF6	MYST/Esa1 associated factor 6 [Source:HGNC Symbol;Acc:HGNC:25674]	protein_coding	848	1151	372	335	1539	785	1589	639	515	1214	1349	3099	1014	1335	660	1085	292	1051	370	573	1325	1087	1615	843	189	1070	906	1229	2280	1257	582	461	362	1896	567	963	1316	1923	879	1289	1978	708	9428	1774	412
ENSG00000282872	ENSG00000282872	C1orf232	chromosome 1 open reading frame 230 [Source:HGNC Symbol;Acc:HGNC:53426]	protein_coding	0	0	0	0	0	0	0	0	1	2	0	0	0	0	0	0	0	3	0	3	0	0	2	2	1	3	0	0	0	1	7	0	0	0	2	0	4	22	1	1	0	2	83	17	7
ENSG00000131238	ENSG00000131238	PPT1	palmitoyl-protein thioesterase 1 [Source:HGNC Symbol;Acc:HGNC:9325]	protein_coding	1083	1105	497	322	2639	703	3100	596	550	863	1234	2290	1320	2570	1122	1230	1037	1248	707	617	1661	1517	2153	728	183	1456	1570	1164	1884	1068	1298	514	671	2236	877	1305	1124	1161	704	5585	2859	2579	9735	46	880
ENSG00000171680	ENSG00000171680	PLEKHG5	pleckstrin homology and RhoGEF domain containing G5 [Source:HGNC Symbol;Acc:HGNC:29105]	protein_coding	20	42	7	3	151	51	14	64	19	86	24	75	28	5	54	62	27	26	9	16	58	97	79	46	4	56	10	6	34	22	27	33	30	52	12	20	30	6	11	56	13	4	134	134	95
ENSG00000244457	ENSG00000244457	ENO1P1	enolase 1 pseudogene 1 [Source:HGNC Symbol;Acc:HGNC:3352]	transcribed_processed_pseudogene	16	56	2	8	127	6	16	7	2	42	31	528	2	73	8	2	19	45	2	43	74	17	50	69	7	7	5	49	8	151	47	44	22	48	0	2	67	39	65	64	0	3	3	1	10
ENSG00000116977	ENSG00000116977	LGALS8	galectin 8 [Source:HGNC Symbol;Acc:HGNC:6569]	protein_coding	942	2877	428	741	1230	1676	2008	1457	690	2367	770	3472	1424	2644	693	1407	656	2526	371	1234	2337	2222	2006	1327	290	2004	1476	1833	2741	2948	743	1353	435	3455	1440	1149	1234	1569	813	2688	1784	2634	10214	793	702
ENSG00000229372	ENSG00000229372	SZT2-AS1	SZT2 antisense RNA 1 [Source:HGNC Symbol;Acc:HGNC:41225]	lncRNA	7	0	1	13	57	13	6	3	9	3	24	45	8	1	3	0	0	22	6	2	1	10	10	10	0	22	17	4	11	43	12	0	2	19	0	0	0	0	2	0	0	0	0	0	4
ENSG00000229348	ENSG00000229348	HYI-AS1	HYI antisense RNA 1 [Source:HGNC Symbol;Acc:HGNC:41173]	lncRNA	0	0	0	0	0	2	3	6	3	0	0	1	0	0	0	0	0	8	0	23	18	26	18	0	0	14	0	2	0	0	0	0	6	0	0	0	1	0	0	0	0	0	0	5	2
ENSG00000242485	ENSG00000242485	MRPL20	mitochondrial ribosomal protein L20 [Source:HGNC Symbol;Acc:HGNC:14478]	protein_coding	492	1090	182	246	737	615	806	427	214	885	375	1329	517	743	293	499	196	838	176	344	854	903	885	775	80	748	424	596	862	848	371	355	274	1700	705	1340	920	2241	662	1564	2443	1559	1325	58	1118
ENSG00000264293	ENSG00000264293	RN7SL657P	RNA, 7SL, cytoplasmic 657, pseudogene [Source:HGNC Symbol;Acc:HGNC:46673]	misc_RNA	0	8	6	1	0	4	0	0	0	17	0	25	0	0	0	0	0	6	0	16	0	7	1	23	0	0	0	7	2	20	0	0	0	0	6	6	0	2	0	0	0	0	0	0	2
ENSG00000272455	ENSG00000272455	MRPL20-DT	MRPL20 divergent transcript [Source:HGNC Symbol;Acc:HGNC:54814]	lncRNA	9	11	0	4	1	0	0	1	3	4	0	6	10	0	2	12	1	5	0	12	0	3	0	8	3	17	2	8	16	7	1	1	0	0	3	2	0	0	0	0	0	0	153	17	5
ENSG00000225905	ENSG00000225905	ANKRD65-AS1	ANKRD65 antisense RNA 1 [Source:HGNC Symbol;Acc:HGNC:55844]	lncRNA	5	1	0	0	4	0	1	0	4	0	0	1	12	1	2	0	2	2	0	1	31	0	7	2	0	0	0	0	14	3	3	0	3	3	0	5	1	9	3	5	4	0	8	21	7
ENSG00000179403	ENSG00000179403	VWA1	von Willebrand factor A domain containing 1 [Source:HGNC Symbol;Acc:HGNC:30910]	protein_coding	13	19	12	5	34	19	27	13	6	7	14	20	19	7	20	26	12	8	4	1	45	72	26	5	1	4	12	7	42	13	28	2	10	29	144	288	41	9	63	75	13	0	74	86	113
ENSG00000215915	ENSG00000215915	ATAD3C	ATPase family AAA domain containing 3C [Source:HGNC Symbol;Acc:HGNC:32151]	protein_coding	3	26	9	17	31	44	13	11	11	52	0	15	9	7	28	9	23	29	9	21	28	115	14	62	25	48	25	18	22	43	45	8	8	21	113	29	50	13	43	60	7	9	97	61	59
ENSG00000236085	ENSG00000236085	ACTG1P4	actin gamma 1 pseudogene 4 [Source:HGNC Symbol;Acc:HGNC:149]	processed_pseudogene	0	6	0	0	0	0	0	0	1	1	0	0	0	0	0	1	0	1	0	10	0	9	0	0	0	0	0	0	0	0	0	0	0	0	0	1	0	0	3	2	0	0	5	28	8
ENSG00000135776	ENSG00000135776	ABCB10	ATP binding cassette subfamily B member 10 [Source:HGNC Symbol;Acc:HGNC:41]	protein_coding	187	1471	97	384	1089	1037	373	800	166	1224	561	1498	375	464	363	669	142	2356	114	1071	416	521	1784	2638	134	2254	318	609	891	3025	159	262	176	1171	400	1876	126	1288	378	546	6	482	34	44	343
ENSG00000201492	ENSG00000201492	RNA5SP78	RNA, 5S ribosomal pseudogene 78 [Source:HGNC Symbol;Acc:HGNC:42855]	rRNA_pseudogene	3	14	0	0	0	2	0	5	1	0	0	0	0	0	11	0	8	11	2	14	0	0	9	0	6	0	5	14	0	15	0	0	0	7	29	0	0	0	6	12	0	0	0	0	1
ENSG00000135763	ENSG00000135763	URB2	URB2 ribosome biogenesis homolog [Source:HGNC Symbol;Acc:HGNC:28967]	protein_coding	14	220	31	40	18	122	2	14	1	149	0	236	62	139	53	104	35	177	19	101	1	166	58	91	28	184	44	217	104	83	52	96	1	308	19	797	52	5	14	55	0	5	26	11	47
ENSG00000225984	ENSG00000225984	HMGB1P26	high mobility group box 1 pseudogene 26 [Source:HGNC Symbol;Acc:HGNC:39117]	processed_pseudogene	1	18	0	14	3	1	0	1	1	2	0	2	1	1	1	1	0	2	0	9	9	26	1	2	0	13	2	4	1	7	1	0	2	13	1	22	0	2	2	0	0	0	0	0	2
ENSG00000169914	ENSG00000169914	OTUD3	OTU deubiquitinase 3 [Source:HGNC Symbol;Acc:HGNC:29038]	protein_coding	5	39	11	1	52	7	31	15	20	13	6	120	44	6	64	0	23	14	5	38	13	137	12	37	16	26	3	48	112	68	14	5	12	19	11	29	109	2	90	77	26	0	33	83	32
ENSG00000269956	ENSG00000269956	MKNK1-AS1	MKNK1 antisense RNA 1 [Source:HGNC Symbol;Acc:HGNC:44129]	lncRNA	270	368	58	71	304	407	417	205	114	343	232	416	330	243	65	394	48	614	53	258	129	404	228	262	27	423	155	244	338	843	140	392	107	1025	238	509	336	14	125	549	0	792	1355	4	122
ENSG00000162456	ENSG00000162456	KNCN	kinocilin [Source:HGNC Symbol;Acc:HGNC:26488]	protein_coding	1	2	1	0	2	0	0	3	2	1	0	10	0	0	1	0	1	0	1	7	0	3	0	12	0	3	2	12	0	9	5	0	0	0	5	3	1	1	1	3	23	5	13	3	18
[truncated: 37,485 more rows]
[truncated: 183 more columns]

## Sheet: Table S2
Table S2. The 1317 DEGs at 12 hours after reperfusion compared to before reperfusion
[truncated: 1,318 more rows]

## Sheet: Table S3
Table S3. ROC analysis of 1317 DEGs at 12 hours after reperfusion
ENSEMBL ID	Symbol	Description	Sensitivity	Specificity	Accuracy	AUC
[truncated: 1,317 more rows]

## Sheet: Table S4
Table S4. 357 DEGs with a minimum specificity and sensitivity of 80%
[truncated: 358 more rows]

[truncated: 7 more sheets: Table S5, Table S6, Table S7, Table S8, Table S9, Table S10, Table S11]
